# Supplementary material for: Robo2 regulates synaptic oxytocin content by affecting actin dynamics
Source: eLife. 2019 Jun 10;8:e45650. doi: 10.7554/eLife.45650 (PMC6590984; doi:10.7554/eLife.45650)
Supplement: Figure 1—source data 1. — The excel sheet includes values for weighted colocalization coefficients calculated from confocal images of immunostained transgenic (oxt:gal4; UAS:Syp-EGFP) larval neurohypophysis. [file elife-45650-fig1-data1.xlsx]

## Sheet: 1E
Weighted Colocalization coeficient OXT (cy5) with respect to Syp-EGFP (antiGFP)
Slice	Sample 1	Sample 2	Sample 3	Sample 4	Sample 5
1	0.635	0.748	0.728	0.771	0.69
2	0.629	0.889	0.89	0.882	0.829
3	0.654	0.939	0.96	0.924	0.906
4	0.688	0.973	0.98	0.948	0.924
5	0.688	0.987	0.986	0.953	0.93
6	0.679	0.991	0.988	0.957	0.936
7	0.659	0.995	0.991	0.961	0.944
8	0.623	0.997	0.993	0.973	0.943
9	0.583	0.994	0.998	0.967	0.92
10				0.923
Average	0.648667	0.945889	0.946	0.9259	0.891333
Overall Average	0.871558
