# Supplementary material for: Robo2 regulates synaptic oxytocin content by affecting actin dynamics
Source: eLife. 2019 Jun 10;8:e45650. doi: 10.7554/eLife.45650 (PMC6590984; doi:10.7554/eLife.45650)
Supplement: Figure 2—source data 1. — The excel sheet includes values for number and volume of neurohypophyseal synapses and OXT puncta upon hyperosmotic challenge. [file elife-45650-fig2-data1.xlsx]

## Sheet: 2B
Neurohypophyseal synapses count
Naive	20minsSalt	60minsSalt	Recovery
358	294	361	328
422	316	423	372
410	397	366	304
514	352	272	343
301	420	313	310
367	316	431	422
328	228	303	328
407	263	216	468
311	268	214	320
293		333	296
272		352	282
298		262
344
407
425
296
267
393
222
437
343
425
520
277
360
245
444
428
497
223

## Sheet: 2C
Neurohypophyseal synapses volume (mm3)
Naive	20minsSalt	60minsSalt	Recovery
1.30567	1.1496	1.12207	1.00961
1.1342	1.0952	1.06385	1.22662
1.12604	1.07815	1.12513	1.1038
1.28875	1.15784	1.24147	1.06309
1.27474	1.01188	1.07916	1.10146
1.21692	1.03262	0.986768	1.19447
1.30919	0.914316	1.05175	1.08216
1.29758	1.13166	1.18115	1.18714
1.16166	0.983249	1.11894	1.23281
1.22667		1.14193	1.07702
1.24967		1.08522	1.26433
1.188		1.11541
1.17378
1.23396
1.08153
1.1298
1.0893
1.15809
0.968736
1.12066
1.16451
1.06801
1.12189
1.17944
1.15697
1.26943
1.19405
1.14882
1.11813
1.02639

## Sheet: 2D
Neurohypophyseal synapses positive OXT puncta count
Naive	20minsSalt	60minsSalt	Recovery
252	249	283	255
283	249	307	252
306	322	278	234
412	260	240	257
213	337	233	218
289	247	361	325
300	168	227	262
376	200	182	396
221	214	183	240
207		265	215
213		256	221
214		232
229
305
345
238
201
275
169
339
255
305
398
199
277
180
374
332
342
162

## Sheet: 2E
Neurohypophyseal synapses positive OXT puncta volume (mm3)
Naive	20minsSalt	60minsSalt	Recovery
1.57433	1.42876	1.36961	1.22699
1.58959	1.21031	1.28819	1.61489
1.43377	1.2462	1.32608	1.44722
1.67325	1.49	1.34129	1.37193
1.59682	1.34707	1.28837	1.50763
1.43435	1.32817	1.29632	1.35456
1.39144	1.21	1.16733	1.29273
1.29147	1.50845	1.27621	1.25686
1.52694	1.18583	1.24787	1.56655
1.773		1.3618	1.36991
1.47128		1.4008	1.61996
1.64702		1.24885
1.77268
1.66618
1.25471
1.29264
1.4441
1.63829
1.17806
1.54737
1.66297
1.46543
1.43686
1.42425
1.61133
1.70058
1.28682
1.45513
1.50322
1.42955

## Sheet: 3G
Neurohypophyseal synapses count
Btx-	Btx+	Btx+ ST
739	467	592
577	515	568
545	477	433
531	478	484
508	664	455
616	561	517
423	344	656
577	564	512
564	529	490
624	551	478
507	516	553
547	466	577
627	554
	566

## Sheet: 3H
Neurohypophyseal synapses volume (mm3)
Btx-	Btx+	Btx+ ST
0.871287	1.23063	1.25491
1.06641	1.08373	1.19533
1.07028	1.07397	1.24502
1.00819	1.42538	1.12386
0.911214	1.14989	1.02937
0.982141	1.1283	1.15393
1.24049	1.14497	1.15534
0.965132	1.12171	1.10368
1.11982	1.17454	1.08286
1.18435	0.994717	0.951646
1.19973	1.32107	1.05816
1.13367	1.05304	1.14304
1.38611	1.1449
	1.20906

## Sheet: 3I
Neurohypophyseal synapses positive OXT puncta count
Btx-	Btx+	Btx+ ST
331	222	171
258	255	208
257	139	150
200	235	125
222	356	206
297	301	201
163	197	326
285	251	246
138	287	216
145	315	161
192	267	202
169	248	162
238	284
	146

## Sheet: 3J
Neurohypophyseal synapses positive OXT puncta volume (mm3)
Btx-	Btx+	Btx+ ST
0.829568	1.05749	0.970315
0.826807	0.967702	0.950958
0.792847	0.89395	0.997585
0.77107	1.16248	1.03988
0.854094	1.03717	0.835421
0.751242	0.884477	0.990866
0.805801	1.17959	0.882379
0.749014	1.11012	0.957262
0.767675	0.987753	1.07797
0.730327	0.967626	0.795593
0.767877	0.960446	0.918655
0.837137	0.947467	0.790017
0.786893	1.06439
	0.818269
