# Supplementary material for: Robo2 regulates synaptic oxytocin content by affecting actin dynamics
Source: eLife. 2019 Jun 10;8:e45650. doi: 10.7554/eLife.45650 (PMC6590984; doi:10.7554/eLife.45650)
Supplement: Figure 3—source data 1. — The excel sheet includes values for number and volume of neurohypophyseal synapses and OXT puncta from confocal imaging of larvae that were subjected to DMSO vs cytochalasin treatment or embryos that underwent transgenesis experiment for OXT-neuron specific EGFP vs cofilin expression. [file elife-45650-fig3-data1.xlsx]

## Sheet: 3E
Neurohypophyseal synapses count
DMSO	Cyto-D
417	396
488	402
461	416
553	456
504	327
465	560
549	201
676	352
	435
	383
	361
	433
514.125	393.5
74.4856	81.5797
S pooled 1	78.0327			Cohen's D1:	1.54583
S pooled 2	78.1132			Cohen's D2:	1.54423
S pooled 3	78.8967			Cohen's D3:	1.5289

## Sheet: 3F
Neurohypophyseal synapses volume (mm3)
DMSO	Cyto-D
1.03568	0.87984
0.910186	0.99432
0.885726	0.969939
0.947425	0.810767
1.11984	0.892927
1.0237	0.9284
0.926875	0.996504
0.980513	0.902761
	0.892439
	0.939065
	0.952033
	0.949615
0.978744	0.925717
0.0726285	0.050949
S pooled 1	0.0617887			Cohen's D1:	0.858193
S pooled 2	0.0627323			Cohen's D2:	0.845284
S pooled 3	0.0603131			Cohen's D3:	0.879189

## Sheet: 3G
Neurohypophyseal synapses positive OXT puncta count
DMSO	Cyto-D
316	318
341	295
311	347
393	307
397	257
366	420
321	156
422	237
	310
	294
	290
	350
358.375	298.417
39.5852	62.0933
S pooled 1	50.8392			Cohen's D1:	1.17937
S pooled 2	52.07			Cohen's D2:	1.1515
S pooled 3	54.457			Cohen's D3:	1.10102

## Sheet: 3H
Neurohypophyseal synapses positive OXT puncta volume (mm3)
DMSO	Cyto-D
1.29696	1.15044
1.20568	1.12132
1.09172	1.11929
1.12148	0.968149
1.45845	0.991112
1.17405	1.07202
1.24581	1.21019
1.2065	1.07627
	1.00255
	1.17058
	1.08863
	1.16922
1.22508	1.09498
0.107181	0.0737096
S pooled 1	0.0904453			Cohen's D1:	1.43841
S pooled 2	0.0919807			Cohen's D2:	1.4144
S pooled 3	0.088248			Cohen's D3:	1.47423

## Sheet: 3J
Neurohypophyseal OXT puncta count
EGFP-	EGFP+
198	171
261	250
289	285
248	266
293	304
202	190
277	310
204	184
187	204
214	271
283	258
267	265
239	159
379	326
223	217
211	273
213	214
282	223
261	187
	224
249	239.05
45.5943	47.4273
S pooled 1	46.5108			Cohen's D1:	0.213929
S pooled 2	46.5198			Cohen's D2:	0.213887
S pooled 3	46.5446			Cohen's D3:	0.213773

## Sheet: 3K
Neurohypophyseal OXT puncta volume (mm3)
EGFP-	EGFP+
0.839171	0.828387
0.836022	0.769539
0.846174	0.822004
0.679562	0.89435
0.786868	0.757556
1.11542	0.849919
0.766596	0.796915
0.819424	0.921383
1.012	0.826609
0.743329	0.788854
0.767618	0.950467
0.954238	0.700533
0.830207	0.873513
0.776661	0.698598
0.968386	0.966291
0.759782	0.647534
0.968829	1.00475
0.888643	0.889488
0.862813	0.925988
	0.907917
0.853776	0.84103
0.105233	0.0932443
S pooled 1	0.0992386			Cohen's D1:	0.128435
S pooled 2	0.0994195			Cohen's D2:	0.128201
S pooled 3	0.0992576			Cohen's D3:	0.12841

## Sheet: 3M
Neurohypophyseal OXT puncta count
Cofilin-EGFP -	Cofilin-EGFP +
316	217
206	241
176	303
128	186
270	227
269	190
220	239
195	229
233	203
279	169
209	121
	172
	164
	168
	203
227.364	202.133
50.9122	41.8105
S pooled 1	46.3613			Cohen's D1:	0.54421
S pooled 2	46.5841			Cohen's D2:	0.541607
S pooled 3	45.8231			Cohen's D3:	0.550603

## Sheet: 3N
Neurohypophyseal OXT puncta volume (mm3)
Cofilin-EGFP -	Cofilin-EGFP +
0.812201	0.849288
0.837803	0.786387
0.927924	0.703928
0.836976	0.781193
0.922515	0.799565
0.824943	0.866071
0.84435	0.796698
0.973928	0.785802
0.822815	0.905956
0.924063	0.82271
0.939938	0.792227
	0.965825
	0.776365
	0.738838
	0.93447
0.87886	0.820355
0.0557977	0.0693992
S pooled 1	0.0625984			Cohen's D1:	0.934604
S pooled 2	0.0629668			Cohen's D2:	0.929137
S pooled 3	0.0640837			Cohen's D3:	0.912943
