# Supplementary material for: Robo2 regulates synaptic oxytocin content by affecting actin dynamics
Source: eLife. 2019 Jun 10;8:e45650. doi: 10.7554/eLife.45650 (PMC6590984; doi:10.7554/eLife.45650)
Supplement: Figure 4—source data 1. — The excel sheet includes values for FRAP data of neurohypophyseal synaptic Lifeact-EGFP in robo2 +/+ vs robo2 -/- larvae. The full-scale normalized values, dynamic and stable fraction generated from Easy-Frap software are shown. [file elife-45650-fig4-data1.xlsx]

## Sheet: 4D_WT
time	3a.txt	3b.txt	5a.txt	5b.txt	5c.txt	6a.txt	6b.txt	6c.txt	7a.txt	7b.txt	7c.txt	12a.txt	12b.txt	12c.txt	19a.txt	19b.txt	19c.txt	20a.txt	20b.txt
0	0	0	0	0	0	0	0	0	0	0	0	0	0	0	0	0	0	0	0
0.351	0.138217	-0.0184069	0.183775	-0.0686126	0.0225366	0.031093	0.0785001	0.104343	0.0055395	-0.115134	0.0127605	0.0190111	0.0694412	0.0254696	0.0864924	0.0418015	0.0660271	-0.0264805	-0.0504026
0.691	0.25336	0.203108	0.140013	0.0661678	0.00285408	0.117332	0.0670625	0.052746	0.0512813	-0.0504327	0.0549343	0.0165855	-0.0494963	-0.018457	0.135822	0.0753023	0.0383424	0.0892813	-0.0240903
1.03	0.159935	-0.0123836	0.0951894	-0.0115824	0.0739598	0.0703343	0.0766572	0.188151	0.0969752	0.131529	0.193628	0.00095219	0.105468	0.0577812	0.0770222	0.0159222	0.0708415	0.0333114	-0.0107209
1.385	0.152615	0.038647	0.128629	0.0563429	0.0965882	0.111166	0.093097	0.111319	0.0651412	-0.122775	0.0888388	0.0703351	0.126816	0.0338492	0.0989852	0.103488	0.143006	0.0707179	0.0663525
1.735	0.209085	0.0812685	0.210249	0.0883609	0.0697148	0.0744032	0.0873173	0.157951	0.20411	0.145545	0.14677	0.0347747	0.0988309	-0.00131026	0.133068	0.0984586	0.107657	0.159551	0.0686523
2.075	0.297359	0.100104	0.24387	0.17734	0.141913	0.216529	0.146595	0.186532	0.173069	0.121599	0.159133	0.00688955	0.10462	0.0762315	0.113451	0.125979	0.107555	0.118319	0.106026
2.418	0.264524	0.0529641	0.206964	0.0937459	0.136899	0.219996	0.145648	0.1896	0.186255	0.146968	0.206896	0.166892	0.277445	0.246679	0.210374	0.150708	0.137554	0.175333	0.222656
2.766	0.172806	-0.019344	0.280431	0.154935	0.219696	0.229076	0.090935	0.203118	0.146023	0.0776679	0.228942	0.149024	0.178337	0.114076	0.198736	0.131219	0.150987	0.185527	0.143214
3.106	0.18802	0.110279	0.234962	0.275404	0.121519	0.117219	0.149327	0.161884	0.240376	0.228164	0.270732	0.181697	0.088032	0.188737	0.193696	0.162212	0.182711	0.163919	0.221415
3.457	0.156378	0.160138	0.280535	0.120541	0.179277	0.0963991	0.162774	0.23534	0.141122	0.177936	0.270145	0.182643	0.220781	0.242428	0.295151	0.167129	0.2233	0.159212	0.153064
3.787	0.505832	0.288451	0.325086	0.13026	0.19846	0.233605	0.169556	0.279287	0.182272	0.174186	0.227162	0.139345	0.344292	0.208964	0.296014	0.175598	0.201975	0.147121	0.32305
4.135	0.35346	0.250424	0.377331	0.191559	0.208094	0.209065	0.152759	0.254777	0.23352	0.241964	0.17223	0.123348	0.206132	0.221847	0.252485	0.214068	0.199203	0.193983	0.203642
4.47	0.226123	0.152281	0.367832	0.351529	0.275717	0.151509	0.160628	0.275045	0.198472	0.11442	0.225354	0.178153	0.217114	0.179206	0.32752	0.239834	0.205518	0.324048	0.264379
4.841	0.233716	0.129215	0.200697	0.186832	0.264125	0.319687	0.156078	0.21773	0.315224	-0.0239395	0.29893	0.193283	0.215728	0.231989	0.256401	0.239816	0.257397	0.301939	0.321042
5.241	0.349718	0.158129	0.295496	0.14379	0.203425	0.177442	0.158291	0.338908	0.301632	0.0619301	0.26025	0.0893351	0.330625	0.199968	0.225318	0.258493	0.207646	0.373094	0.373503
5.581	0.417689	0.256207	0.420433	0.309123	0.291361	0.240645	0.192605	0.295236	0.206385	0.228908	0.317673	0.187325	0.386504	0.271602	0.303935	0.248601	0.269788	0.236111	0.269874
5.92	0.413046	0.184669	0.43363	0.226933	0.271862	0.25659	0.163862	0.36873	0.250916	0.313166	0.286711	0.160161	0.429982	0.255677	0.289165	0.307557	0.280348	0.118542	0.143396
6.272	0.463152	0.334874	0.465075	0.286482	0.299571	0.197983	0.189552	0.303349	0.312169	0.372261	0.347365	0.166204	0.354755	0.310169	0.226707	0.230464	0.261947	0.31668	0.304867
6.621	0.317622	0.249752	0.298365	0.240834	0.244017	0.209357	0.162339	0.293726	0.282494	0.218709	0.277155	0.305261	0.304912	0.308263	0.301792	0.278124	0.276894	0.293728	0.278007
6.95	0.524311	0.288172	0.314875	0.312833	0.278116	0.389678	0.19253	0.394729	0.27855	0.187259	0.363131	0.238352	0.336375	0.221989	0.333821	0.263228	0.319479	0.300589	0.263704
7.301	0.499434	0.211368	0.396735	0.453157	0.314971	0.311229	0.247552	0.342528	0.258511	0.313839	0.334208	0.23456	0.206833	0.265401	0.320785	0.252503	0.309112	0.288064	0.351877
7.646	0.306968	0.168691	0.382147	0.160387	0.296875	0.269024	0.186436	0.354949	0.326921	0.240123	0.321878	0.226506	0.349528	0.279989	0.280434	0.256043	0.282265	0.339692	0.20576
7.985	0.304556	0.276874	0.316305	0.274851	0.332696	0.236853	0.241137	0.295423	0.269238	0.357997	0.368175	0.281261	0.420955	0.243813	0.384887	0.320476	0.347984	0.35738	0.337371
8.325	0.543781	0.309678	0.353536	0.320733	0.375461	0.389739	0.244184	0.344945	0.226197	0.346147	0.332008	0.285668	0.354351	0.303817	0.331457	0.312944	0.30915	0.34865	0.376112
8.675	0.375433	0.266542	0.36633	0.289849	0.23517	0.32939	0.219153	0.311303	0.285828	0.361042	0.380132	0.284067	0.42561	0.373591	0.356779	0.399094	0.369245	0.36247	0.392539
9.025	0.513243	0.255844	0.345546	0.276845	0.363698	0.278611	0.237965	0.34972	0.302037	0.299614	0.405175	0.305678	0.528762	0.447213	0.389551	0.266176	0.354571	0.470042	0.456972
9.363	0.331107	0.267098	0.348158	0.292556	0.348026	0.294111	0.227425	0.451524	0.347145	0.39969	0.415526	0.233317	0.383035	0.289516	0.406943	0.33927	0.30624	0.334481	0.399247
9.706	0.422622	0.36076	0.532728	0.314296	0.395522	0.27453	0.236235	0.357418	0.315268	0.253962	0.350802	0.32251	0.394854	0.361264	0.31128	0.329468	0.323666	0.27607	0.383684
10.045	0.188918	0.268512	0.466343	0.401918	0.330666	0.301688	0.219873	0.383567	0.319804	0.424427	0.4188	0.415072	0.541918	0.466411	0.347793	0.366917	0.291576	0.425104	0.386337
10.396	0.498336	0.299034	0.367101	0.298939	0.339566	0.310371	0.247317	0.36575	0.36472	0.285147	0.388941	0.298623	0.375331	0.435948	0.320583	0.363298	0.326401	0.503501	0.511057
10.8	0.339628	0.361704	0.424714	0.369937	0.396541	0.322549	0.256894	0.4964	0.357343	0.331666	0.28737	0.29003	0.435183	0.31886	0.405916	0.346022	0.34878	0.600104	0.438614
11.07	0.595812	0.396707	0.401403	0.395694	0.265688	0.320449	0.246762	0.422259	0.338043	0.482441	0.443098	0.250343	0.422386	0.350634	0.317468	0.375972	0.31939	0.322684	0.353394
11.419	0.661985	0.286029	0.458286	0.41055	0.37892	0.462475	0.234767	0.513561	0.288603	0.514904	0.342917	0.311677	0.479239	0.4029	0.407089	0.331903	0.443336	0.334512	0.411466
11.759	0.388938	0.337222	0.477669	0.269015	0.299396	0.311842	0.246982	0.342472	0.364456	0.58626	0.482488	0.325079	0.459349	0.453689	0.461156	0.368236	0.377131	0.336832	0.375934
12.119	0.631229	0.302043	0.492576	0.472693	0.398483	0.196116	0.253832	0.411598	0.375327	0.448201	0.45632	0.186238	0.263622	0.366461	0.379942	0.344142	0.332874	0.503568	0.561766
12.448	0.467206	0.367563	0.446459	0.288305	0.433408	0.349634	0.287071	0.416409	0.369308	0.710137	0.491454	0.35113	0.453229	0.396586	0.405996	0.335494	0.373807	0.607013	0.483082
12.785	0.535934	0.210837	0.448054	0.421653	0.372194	0.473964	0.257159	0.424683	0.379537	0.363697	0.486809	0.333878	0.428107	0.380943	0.448476	0.382063	0.374792	0.459736	0.350819
13.129	0.697192	0.399432	0.462414	0.436399	0.407547	0.318637	0.292907	0.339337	0.404114	0.382632	0.453648	0.329562	0.578436	0.451947	0.512318	0.363346	0.426909	0.538607	0.531443
13.469	0.568534	0.310094	0.477036	0.276976	0.345417	0.357651	0.247803	0.396284	0.31956	0.398446	0.41228	0.352752	0.557412	0.386785	0.443942	0.287086	0.369226	0.544287	0.464766
13.829	0.476675	0.461731	0.438558	0.372954	0.349265	0.337178	0.266781	0.375682	0.434698	0.417919	0.400437	0.34096	0.591387	0.502835	0.452721	0.374342	0.413577	0.419923	0.405298
14.169	0.567871	0.319677	0.449243	0.393897	0.405073	0.398521	0.331357	0.412204	0.4552	0.575581	0.542499	0.351628	0.487517	0.442887	0.453264	0.402629	0.374237	0.445037	0.360751
14.509	0.586326	0.390483	0.534458	0.478392	0.467002	0.343083	0.313253	0.433117	0.359956	0.514018	0.487388	0.338757	0.409727	0.401449	0.458239	0.378475	0.37837	0.544173	0.439856
14.85	0.536592	0.26949	0.526995	0.455541	0.437679	0.321516	0.268832	0.442132	0.373813	0.450863	0.518347	0.337932	0.452235	0.514059	0.419192	0.407725	0.402118	0.535733	0.595565
15.189	0.578133	0.442001	0.506724	0.37635	0.452939	0.302218	0.263089	0.347163	0.30234	0.310132	0.397911	0.306922	0.425292	0.315277	0.474539	0.463926	0.376874	0.363389	0.427185
15.55	0.342077	0.460235	0.533627	0.419843	0.479449	0.204137	0.241549	0.335563	0.343558	0.266818	0.551755	0.389806	0.584872	0.401845	0.516001	0.399214	0.439579	0.424829	0.497707
15.989	0.427662	0.474881	0.598989	0.415921	0.445487	0.39325	0.337225	0.462972	0.39094	0.448399	0.559173	0.320841	0.412119	0.338949	0.521206	0.374233	0.375767	0.453324	0.50004
16.238	0.622656	0.327189	0.554918	0.435668	0.406559	0.413083	0.270742	0.428103	0.41235	0.341944	0.604994	0.442417	0.668098	0.383751	0.508066	0.384402	0.485384	0.491782	0.585937
16.59	0.589392	0.358539	0.558372	0.375737	0.439263	0.233021	0.288467	0.378037	0.461895	0.552846	0.576494	0.361233	0.485187	0.459779	0.478584	0.335313	0.419164	0.445357	0.40663
16.93	0.361998	0.242283	0.629607	0.487151	0.497648	0.410938	0.343793	0.487493	0.391676	0.455179	0.524391	0.442134	0.41971	0.406592	0.513963	0.447579	0.418176	0.472592	0.467986
17.28	0.515277	0.291166	0.581013	0.497694	0.478184	0.353871	0.283503	0.391218	0.371354	0.425796	0.441745	0.372593	0.570842	0.466986	0.552549	0.428121	0.472386	0.66003	0.436339
17.63	0.526282	0.297302	0.533895	0.576848	0.45197	0.392026	0.309895	0.422655	0.442551	0.755541	0.566731	0.407473	0.519881	0.536897	0.507192	0.392899	0.361015	0.53109	0.50348
17.968	0.497187	0.408445	0.586271	0.451461	0.454905	0.476961	0.27552	0.499892	0.48319	0.562373	0.593793	0.358507	0.58405	0.501362	0.385642	0.306392	0.447832	0.589963	0.458926
18.318	0.44472	0.40161	0.603687	0.59422	0.408448	0.370309	0.303501	0.440027	0.346177	0.444671	0.406895	0.454432	0.664758	0.516751	0.500083	0.397807	0.41016	0.516853	0.592454
18.659	0.754227	0.304962	0.601143	0.426865	0.459504	0.445421	0.31598	0.528448	0.359225	0.522051	0.560497	0.323214	0.543757	0.555382	0.393067	0.41409	0.39413	0.457463	0.581116
19.011	0.76157	0.36332	0.576323	0.451511	0.460831	0.307276	0.258259	0.396726	0.421028	0.58581	0.581844	0.370203	0.586459	0.523617	0.561845	0.460744	0.460961	0.45431	0.415658
19.34	0.517142	0.284579	0.516415	0.412799	0.384847	0.423931	0.298395	0.454018	0.505834	0.587474	0.586911	0.402326	0.605598	0.46341	0.435133	0.441206	0.4494	0.493787	0.528281
19.689	0.742702	0.464819	0.510672	0.457871	0.444914	0.486779	0.384265	0.432138	0.459788	0.488399	0.506263	0.389349	0.470034	0.581029	0.458065	0.425248	0.420392	0.693363	0.686459
20.03	0.515504	0.22083	0.473324	0.302183	0.428468	0.388486	0.316536	0.456491	0.390728	0.526945	0.538819	0.413074	0.406318	0.500169	0.447501	0.353903	0.373549	0.516665	0.529814
20.369	0.530847	0.469309	0.594112	0.440521	0.501759	0.443146	0.357177	0.609674	0.434328	0.681463	0.602735	0.433759	0.452787	0.481627	0.556332	0.470687	0.498827	0.51282	0.471977
20.721	0.45298	0.289219	0.550021	0.42472	0.447036	0.491225	0.314572	0.538251	0.465056	0.400937	0.511383	0.407537	0.582029	0.467739	0.509364	0.392746	0.492509	0.515202	0.485828
21.052	0.657102	0.419607	0.546045	0.515889	0.444058	0.4119	0.266877	0.532868	0.565926	0.490335	0.635105	0.360033	0.553726	0.502222	0.454988	0.407858	0.43766	0.520118	0.545331
21.4	0.660297	0.496182	0.45837	0.54264	0.464836	0.376464	0.300891	0.49068	0.470347	0.632857	0.686705	0.441927	0.667152	0.454429	0.605139	0.404041	0.411425	0.440693	0.554877
21.75	0.543654	0.396653	0.657534	0.438224	0.49364	0.256824	0.274389	0.397932	0.423338	0.533788	0.534748	0.292265	0.493072	0.50149	0.616888	0.443437	0.503546	0.651509	0.583073
22.089	0.564755	0.371936	0.504698	0.464726	0.412139	0.396935	0.398522	0.521175	0.428344	0.611608	0.539733	0.367842	0.487703	0.460563	0.464015	0.412596	0.411446	0.526468	0.52439
22.439	0.628258	0.370424	0.547015	0.502579	0.529873	0.472314	0.31431	0.530063	0.506414	0.613567	0.498358	0.453915	0.621387	0.46594	0.514221	0.468976	0.484007	0.64286	0.75169
22.774	0.747857	0.471265	0.564205	0.564422	0.493702	0.381391	0.295151	0.396982	0.436061	0.668398	0.540196	0.415068	0.595797	0.578419	0.540559	0.48076	0.436923	0.544149	0.56709
23.128	0.639154	0.486645	0.731183	0.536878	0.560242	0.477446	0.357914	0.5257	0.627441	0.949338	0.586104	0.419193	0.451733	0.495234	0.447073	0.457146	0.507401	0.613382	0.647929
23.462	0.673402	0.434354	0.594874	0.473	0.502201	0.434953	0.362099	0.456403	0.472752	0.400475	0.521777	0.451473	0.517563	0.709554	0.513037	0.443587	0.427782	0.512328	0.530398
23.812	0.45571	0.569502	0.558878	0.47121	0.494003	0.434042	0.334683	0.439894	0.518605	0.648093	0.586384	0.560829	0.80087	0.569075	0.560092	0.44976	0.478011	0.498909	0.545625
24.15	0.713003	0.373845	0.618684	0.561889	0.541618	0.368403	0.365729	0.422874	0.505539	0.628117	0.608075	0.46244	0.512771	0.631802	0.489322	0.431544	0.450589	0.681893	0.598349
24.493	0.681795	0.489789	0.715127	0.586094	0.498073	0.471988	0.30579	0.439547	0.559525	0.726436	0.643789	0.375337	0.541435	0.474087	0.490187	0.401132	0.432576	0.666263	0.551158
24.842	0.729335	0.39244	0.55373	0.472208	0.492003	0.460299	0.276515	0.428664	0.487137	0.673387	0.608051	0.395667	0.479844	0.571009	0.47962	0.41877	0.406678	0.591451	0.598851
25.171	0.442958	0.499011	0.52499	0.428903	0.468054	0.403197	0.439506	0.541849	0.510658	0.57913	0.647317	0.382013	0.618755	0.541066	0.53071	0.486991	0.443823	0.571543	0.50693
25.522	0.782171	0.439699	0.688905	0.433879	0.515804	0.38044	0.310168	0.48351	0.491671	0.508185	0.636274	0.522124	0.787782	0.761426	0.550745	0.476631	0.459585	0.64309	0.581516
25.863	0.886666	0.434964	0.615872	0.488599	0.463283	0.441658	0.357296	0.5172	0.506909	0.567447	0.550433	0.489152	0.622309	0.722946	0.478021	0.454729	0.441045	0.38257	0.462962
26.205	0.60836	0.424903	0.567471	0.589479	0.51049	0.418202	0.313867	0.488238	0.548021	0.622964	0.715515	0.327061	0.414563	0.500376	0.572298	0.496296	0.472827	0.669337	0.582211
26.555	0.790355	0.439204	0.56851	0.448648	0.550719	0.448954	0.353684	0.493794	0.42677	0.548741	0.54616	0.545189	0.743589	0.829532	0.476868	0.38686	0.468756	0.482674	0.3805
26.896	0.342036	0.451021	0.671228	0.464314	0.549727	0.528198	0.332014	0.576587	0.498093	0.577306	0.430954	0.518191	0.760878	0.716476	0.45	0.505856	0.505332	0.574231	0.556842
27.239	0.617249	0.298114	0.744674	0.576522	0.552761	0.558406	0.348268	0.581825	0.488479	0.669462	0.651361	0.425536	0.711284	0.648494	0.513789	0.441109	0.544755	0.549103	0.534115
27.589	0.493816	0.347679	0.596765	0.401938	0.529224	0.461678	0.342032	0.499426	0.514455	0.742093	0.608078	0.379324	0.672484	0.529008	0.548017	0.587015	0.544899	0.476254	0.558496
27.928	0.548459	0.49361	0.690742	0.560769	0.539236	0.308644	0.428069	0.541393	0.568645	0.61027	0.591926	0.475257	0.65124	0.75993	0.451711	0.429926	0.460821	0.55668	0.44303
28.388	0.737428	0.55376	0.551752	0.448097	0.449554	0.435681	0.35696	0.492865	0.522339	0.721805	0.64313	0.421085	0.637436	0.599783	0.540707	0.465051	0.49457	0.562666	0.561915
28.609	0.772136	0.468397	0.510627	0.570235	0.489777	0.575549	0.3954	0.574186	0.469964	0.50661	0.514242	0.488665	0.621096	0.587795	0.517862	0.460399	0.493219	0.548865	0.575855
28.958	0.622956	0.664253	0.656548	0.627054	0.515352	0.562244	0.340812	0.51617	0.494785	0.609206	0.618051	0.509906	0.649774	0.683174	0.527382	0.464715	0.480468	0.554933	0.611928
29.297	0.643277	0.386432	0.641263	0.547874	0.520128	0.337596	0.404493	0.565139	0.617023	0.63044	0.573794	0.414414	0.519672	0.666915	0.531948	0.530279	0.524003	0.625054	0.565625
29.638	0.672958	0.402208	0.59587	0.588244	0.463142	0.456079	0.361251	0.554297	0.500009	0.568141	0.581789	0.494779	0.60584	0.696997	0.536595	0.458037	0.461254	0.545873	0.575564
29.987	0.692676	0.334192	0.586406	0.483939	0.525629	0.42136	0.235389	0.48927	0.342534	0.451701	0.603509	0.496632	0.561756	0.628436	0.558285	0.548754	0.543178	0.497196	0.620152
30.327	0.688103	0.392435	0.765091	0.486175	0.555539	0.493895	0.363771	0.571417	0.476211	0.441042	0.54351	0.405498	0.486082	0.729996	0.521571	0.571723	0.559	0.731087	0.671152
30.668	0.602226	0.581412	0.598319	0.492946	0.565253	0.359094	0.40058	0.535301	0.582121	0.672547	0.551763	0.469907	0.695558	0.794884	0.571221	0.511632	0.574698	0.648531	0.587257
31.016	0.733782	0.413011	0.585156	0.562372	0.476915	0.483147	0.385147	0.500379	0.506743	0.647259	0.60612	0.472523	0.642449	0.717088	0.559852	0.470535	0.506084	0.553001	0.593306
31.358	0.882568	0.468271	0.623732	0.427909	0.469796	0.423653	0.351326	0.567474	0.520572	0.600618	0.648709	0.512252	0.637854	0.715821	0.5289	0.443991	0.476733	0.626448	0.598855
31.708	0.790647	0.552466	0.638097	0.568256	0.548576	0.432033	0.267935	0.482259	0.589744	0.594324	0.702109	0.490261	0.510526	0.67326	0.580031	0.53852	0.554886	0.515307	0.502915
32.037	0.450577	0.407104	0.666215	0.565202	0.576667	0.517559	0.305512	0.531015	0.626305	0.47694	0.671745	0.535061	0.60219	0.788183	0.617702	0.509926	0.550749	0.595326	0.575029
32.388	0.799565	0.446254	0.675203	0.539927	0.569814	0.568703	0.354661	0.538619	0.643995	0.627954	0.574722	0.591424	0.728722	0.687137	0.621163	0.470566	0.544468	0.574188	0.628208
32.728	1.06168	0.892999	0.641863	0.535688	0.564395	0.402877	0.407348	0.633342	0.559598	0.612536	0.536895	0.454622	0.869327	0.664888	0.590386	0.536561	0.589732	0.575168	0.541342
33.068	0.801045	0.395715	0.750359	0.47578	0.636135	0.477696	0.405061	0.617048	0.511873	0.674386	0.664936	0.548605	0.494902	0.616306	0.633705	0.465149	0.557786	0.616545	0.504953
33.418	0.797798	0.522275	0.667775	0.469201	0.597189	0.470683	0.392435	0.650327	0.539123	0.704569	0.635887	0.521966	0.748402	0.707741	0.645729	0.604141	0.609071	0.750199	0.639169
33.758	0.56762	0.417727	0.665013	0.434872	0.52238	0.404102	0.322051	0.54206	0.45122	0.498938	0.486282	0.505471	0.515412	0.591478	0.687706	0.477969	0.517443	0.528837	0.499057
34.109	0.979063	0.437163	0.613763	0.50097	0.54637	0.560898	0.421611	0.501659	0.57051	0.515272	0.568722	0.552185	0.556516	0.702369	0.559769	0.55358	0.6417	0.434835	0.561125
34.447	0.776798	0.543797	0.668156	0.458365	0.518538	0.486083	0.395758	0.532436	0.543806	0.665762	0.598805	0.518308	0.629336	0.75228	0.628474	0.520059	0.540181	0.494263	0.629732
34.787	0.648744	0.618886	0.75789	0.553508	0.568477	0.471445	0.440192	0.678717	0.514759	0.610714	0.610925	0.430252	0.622682	0.560037	0.718461	0.489226	0.567397	0.632828	0.578267
35.139	0.888457	0.5458	0.699442	0.652412	0.610267	0.40302	0.353855	0.440717	0.447888	0.530748	0.681634	0.425582	0.555029	0.546085	0.645175	0.656522	0.635137	0.57786	0.506578
35.588	0.645207	0.347995	0.571578	0.535982	0.59167	0.50737	0.343549	0.519015	0.5716	0.61875	0.657183	0.505204	0.611894	0.674241	0.611503	0.51867	0.566954	0.609271	0.586178
35.818	0.813323	0.527984	0.676951	0.53371	0.580371	0.368235	0.316976	0.457625	0.494242	0.829162	0.626718	0.547644	0.739601	0.792004	0.601673	0.518145	0.587003	0.727089	0.647553
36.159	0.954893	0.538543	0.654985	0.606363	0.59185	0.414399	0.382185	0.617119	0.524368	0.495585	0.610361	0.503488	0.772213	0.661349	0.584076	0.653179	0.54878	0.663156	0.494848
36.508	0.645227	0.511967	0.703915	0.499593	0.59921	0.573709	0.380105	0.633102	0.53215	0.523353	0.660304	0.412402	0.601317	0.782483	0.642071	0.493486	0.524633	0.635989	0.568224
36.859	0.75254	0.445478	0.708075	0.468489	0.624171	0.493218	0.419341	0.595294	0.59855	0.728104	0.663725	0.479652	0.750836	0.593721	0.537391	0.652214	0.56467	0.487897	0.490458
37.208	0.472183	0.573432	0.78538	0.638521	0.668882	0.490745	0.399124	0.60926	0.505653	0.65186	0.549934	0.44561	0.630263	0.682357	0.524674	0.439982	0.497746	0.688225	0.557505
37.547	0.915336	0.611789	0.646384	0.569383	0.603529	0.511355	0.348721	0.601578	0.480937	0.611118	0.600299	0.489416	0.501135	0.740437	0.594557	0.492623	0.535611	0.738053	0.685398
37.889	0.620342	0.437652	0.917441	0.617394	0.640239	0.580821	0.374271	0.650968	0.493579	0.615291	0.579209	0.571407	0.792609	0.765941	0.641362	0.527731	0.593129	0.571833	0.5789
38.228	0.69336	0.41465	0.819985	0.54403	0.571115	0.518868	0.383314	0.548358	0.547488	0.68473	0.683495	0.394358	0.441221	0.624214	0.532309	0.541354	0.511806	0.630583	0.616079
38.589	0.606599	0.608178	0.799858	0.614906	0.713251	0.588892	0.409194	0.566938	0.524957	0.667131	0.658924	0.514032	0.670666	0.704458	0.660153	0.561088	0.580056	0.630627	0.59018
38.937	0.977671	0.611647	0.755385	0.543036	0.532333	0.527215	0.526857	0.656145	0.518292	0.763608	0.568452	0.424288	0.572993	0.657761	0.619527	0.524495	0.593801	0.649593	0.585628
39.277	0.848682	0.677456	0.656411	0.623733	0.528778	0.482891	0.348619	0.570401	0.469728	0.415379	0.499539	0.507766	0.702322	0.745946	0.57004	0.525214	0.591773	0.55753	0.53298
39.623	0.718121	0.464431	0.678052	0.45544	0.488939	0.40342	0.364359	0.572092	0.590822	0.776426	0.697449	0.562636	0.609331	0.673107	0.658851	0.545545	0.576493	0.670612	0.598596
39.964	0.67633	0.436371	0.688539	0.685644	0.637495	0.4259	0.391558	0.634039	0.532735	0.646544	0.675774	0.517593	0.635991	0.782431	0.629564	0.528753	0.523564	0.676782	0.612457
40.314	0.750115	0.453871	0.677071	0.5295	0.642403	0.56532	0.433956	0.484067	0.496162	0.506737	0.654198	0.58662	0.917799	0.724926	0.716302	0.554068	0.544961	0.594012	0.616593
40.655	0.583465	0.409545	0.633436	0.46203	0.555124	0.494389	0.324528	0.569562	0.536068	0.652714	0.64928	0.521301	0.52381	0.835601	0.663375	0.56348	0.59615	0.624328	0.598494
40.995	0.644477	0.431906	0.738755	0.647812	0.59932	0.497106	0.43004	0.629896	0.666655	0.703885	0.719617	0.520379	0.472371	0.652953	0.586823	0.497698	0.61337	0.680428	0.725881
41.334	0.719126	0.63466	0.642829	0.579153	0.586787	0.504073	0.412148	0.581088	0.725877	0.731527	0.725393	0.53779	0.793129	0.859605	0.582546	0.567676	0.578202	0.559436	0.557591
41.797	1.04034	0.639343	0.604448	0.656792	0.620121	0.698685	0.429358	0.678159	0.551937	0.546079	0.665105	0.60538	0.659666	0.90735	0.641017	0.560676	0.649418	0.655833	0.677828
42.027	0.541158	0.571005	0.598347	0.483672	0.492575	0.468446	0.440602	0.585928	0.623543	0.652443	0.761754	0.567978	0.545741	0.612314	0.547116	0.541327	0.534966	0.647991	0.689697
42.368	0.806617	0.656285	0.664462	0.656392	0.668789	0.533907	0.457423	0.580817	0.648857	0.561979	0.702365	0.575135	0.62677	0.780326	0.537388	0.627421	0.609	0.590733	0.616662
42.717	0.790077	0.596283	0.67619	0.704366	0.681706	0.389333	0.344372	0.551746	0.653591	0.505861	0.671292	0.48548	0.646095	0.687846	0.636459	0.538802	0.56431	0.519368	0.597782
43.06	0.857096	0.624791	0.675631	0.624364	0.603755	0.432293	0.343956	0.500286	0.615826	0.644541	0.645576	0.466373	0.655742	0.654112	0.606554	0.511338	0.554443	0.59521	0.685141
43.399	0.940928	0.653203	0.75513	0.533146	0.567883	0.550094	0.402986	0.530948	0.654612	0.883813	0.726514	0.493283	0.781517	0.736252	0.580492	0.584873	0.629451	0.687766	0.551761
43.748	1.02387	0.671434	0.588382	0.587246	0.596266	0.458765	0.326923	0.540762	0.544364	0.637717	0.688085	0.59429	0.811027	0.785312	0.625037	0.643193	0.622832	0.645017	0.558616
44.089	0.751456	0.592471	0.705026	0.565736	0.532504	0.617543	0.410877	0.556751	0.52241	0.711065	0.624496	0.53522	0.650385	0.738701	0.693789	0.619672	0.54132	0.611405	0.642793
44.438	0.579363	0.366276	0.77009	0.587158	0.616598	0.402284	0.353913	0.523939	0.54088	0.65848	0.619532	0.469251	0.763042	0.80856	0.621455	0.474361	0.576117	0.549314	0.627718
44.779	0.836816	0.493537	0.63052	0.529816	0.644389	0.634038	0.437784	0.667565	0.605011	0.640558	0.661122	0.565684	0.694887	0.785733	0.606393	0.578443	0.617226	0.510768	0.576649
45.138	0.807939	0.490389	0.634052	0.678614	0.627503	0.427758	0.34125	0.737494	0.519066	0.673512	0.615518	0.529297	0.775925	0.873542	0.796617	0.621943	0.600371	0.595596	0.637974
45.477	0.612426	0.471679	0.68409	0.60276	0.582246	0.59657	0.44186	0.621467	0.506422	0.566383	0.50363	0.509624	0.772479	0.762123	0.737979	0.615997	0.704805	0.555992	0.52538
45.819	0.854658	0.550982	0.826862	0.75569	0.675824	0.462079	0.377961	0.640558	0.630516	0.665812	0.655484	0.57412	0.859097	0.993003	0.66863	0.499833	0.613191	0.640793	0.629563
46.158	0.687687	0.615077	0.727437	0.642826	0.599553	0.577193	0.467589	0.75362	0.569989	0.778472	0.767379	0.450403	0.511376	0.602201	0.710123	0.531952	0.692118	0.645713	0.723651
46.498	0.807695	0.67184	0.668434	0.567213	0.646753	0.443798	0.403263	0.628865	0.570697	0.60658	0.710703	0.547815	0.643401	0.757061	0.627531	0.530277	0.555241	0.510041	0.568096
46.848	0.741782	0.514851	0.62796	0.646242	0.662682	0.508221	0.400282	0.607188	0.563628	0.685748	0.587547	0.585042	0.682236	0.809216	0.676244	0.588099	0.658046	0.663524	0.701424
47.198	0.964979	0.744435	0.568326	0.62277	0.603589	0.616883	0.414518	0.681085	0.538636	0.699691	0.614109	0.538476	1.02796	0.817477	0.591072	0.605085	0.598136	0.676351	0.646643
47.538	0.85802	0.605476	0.700402	0.478879	0.544749	0.503537	0.395187	0.658877	0.571586	0.694994	0.685537	0.638965	0.828398	0.866029	0.662089	0.543794	0.536736	0.67451	0.624129
47.877	0.783478	0.487362	0.849524	0.56424	0.580377	0.671793	0.445296	0.683003	0.556632	0.601196	0.692959	0.580866	0.676852	0.848711	0.69494	0.620276	0.620538	0.753375	0.825109
48.217	0.93616	0.579242	0.674253	0.635753	0.6298	0.478994	0.493404	0.6347	0.557617	0.697094	0.673041	0.638548	0.757514	0.733683	0.616542	0.599933	0.556129	0.796175	0.701312
48.557	0.742585	0.421881	0.731578	0.522642	0.607414	0.565579	0.461151	0.712747	0.641902	0.788617	0.757306	0.621951	0.796471	0.887234	0.720003	0.615972	0.603547	0.680994	0.7152
48.908	0.665893	0.560023	0.717649	0.588901	0.634036	0.402177	0.37882	0.503568	0.570565	0.681022	0.720474	0.532738	0.686818	0.80501	0.560151	0.591195	0.645802	0.600305	0.57108
49.246	0.838603	0.520461	0.828429	0.610121	0.688584	0.402046	0.321838	0.53951	0.619084	0.626156	0.641874	0.552192	0.592865	0.85558	0.693306	0.590159	0.664806	0.672931	0.649258
49.586	0.978441	0.650429	0.79474	0.559783	0.677942	0.644817	0.426317	0.570463	0.544491	0.593168	0.582127	0.60138	0.767143	0.872309	0.56652	0.536541	0.598588	0.564648	0.676246
49.936	0.82175	0.565891	0.666063	0.539409	0.607033	0.575608	0.379988	0.610837	0.544218	0.597342	0.670986	0.531474	0.71026	0.698906	0.756885	0.590615	0.714184	0.633152	0.644121
50.276	0.882698	0.601395	0.667889	0.585435	0.515644	0.443718	0.417065	0.650864	0.619816	0.807652	0.833011	0.555591	0.675576	0.902765	0.754625	0.572297	0.638092	0.63053	0.673857
50.638	0.585231	0.540104	0.54448	0.553576	0.527481	0.493473	0.330369	0.597053	0.545608	0.829609	0.724046	0.495322	0.737723	0.807461	0.698437	0.561921	0.642218	0.573637	0.740722
50.976	0.693664	0.466894	0.751988	0.648	0.586725	0.599298	0.380294	0.598975	0.640175	0.752489	0.722613	0.545433	0.680428	1.04266	0.669126	0.617615	0.646909	0.681776	0.70811
51.316	0.865554	0.508001	0.748836	0.626824	0.627992	0.609702	0.431834	0.536931	0.578815	0.756807	0.783288	0.515233	0.797779	0.652358	0.662856	0.621803	0.605503	0.611012	0.531269
51.667	0.799709	0.571707	0.585639	0.492903	0.570468	0.563617	0.444595	0.688959	0.571327	0.753561	0.754163	0.569395	0.63516	0.732153	0.68163	0.568123	0.541671	0.634682	0.639114
52.016	0.754123	0.575374	0.760487	0.585145	0.609891	0.497364	0.453061	0.682757	0.600519	0.788788	0.695162	0.519193	0.680004	0.736792	0.629546	0.672226	0.648218	0.57842	0.688452
52.357	0.811504	0.584202	0.699426	0.576409	0.59328	0.500839	0.47008	0.692906	0.589804	0.707368	0.613654	0.636853	0.858193	0.820595	0.719004	0.693072	0.652205	0.680687	0.636096
52.691	0.718189	0.453958	0.692509	0.678445	0.651652	0.408559	0.348127	0.578048	0.663932	0.791158	0.832496	0.539665	0.742129	0.787445	0.715278	0.651349	0.728699	0.652481	0.727273
53.036	0.64793	0.606006	0.635074	0.615319	0.584346	0.455011	0.398526	0.550743	0.664502	0.90932	0.757194	0.631355	0.740011	0.862093	0.71318	0.619843	0.621044	0.660548	0.634086
53.378	0.709399	0.572909	0.819249	0.583716	0.606674	0.562598	0.417856	0.596113	0.517596	0.585438	0.597034	0.618564	0.650914	0.80092	0.774734	0.661059	0.633768	0.626641	0.703894
53.726	0.79918	0.489936	0.720715	0.687241	0.545996	0.511892	0.410965	0.574782	0.540532	0.649166	0.671282	0.40143	0.667784	0.778362	0.676078	0.582666	0.692706	0.85486	0.822661
54.217	0.833823	0.557879	0.787887	0.593297	0.653846	0.421018	0.468266	0.537933	0.652115	0.605233	0.665151	0.607405	0.6867	0.849685	0.594966	0.61761	0.653562	0.538697	0.587643
54.417	0.676934	0.491153	0.724376	0.579042	0.677822	0.473861	0.314023	0.662679	0.627513	0.580064	0.793966	0.525833	0.644945	0.80022	0.8032	0.768755	0.701284	0.622327	0.625145
54.757	0.996888	0.589884	0.74994	0.489482	0.639417	0.574501	0.414724	0.711918	0.660243	0.67179	0.708846	0.533166	0.725072	0.808566	0.657208	0.667723	0.553115	0.89334	0.742536
55.1	0.979094	0.519609	0.811549	0.640316	0.714666	0.565516	0.438054	0.658217	0.585954	0.725497	0.772291	0.719881	0.843246	0.922184	0.693369	0.574255	0.620623	0.725837	0.658813
55.439	0.699084	0.554043	0.74493	0.696435	0.75073	0.487646	0.418485	0.693597	0.533469	0.622597	0.72247	0.474786	0.669136	0.732227	0.648768	0.652074	0.592256	0.802898	0.757873
55.788	1.03387	0.713557	0.646305	0.575781	0.603867	0.543545	0.530041	0.639988	0.624624	0.696122	0.801518	0.647773	0.722862	0.894783	0.690277	0.587665	0.585528	0.64711	0.726517
56.125	1.02438	0.560275	0.892315	0.678616	0.674325	0.606354	0.503632	0.756671	0.599981	0.774577	0.795791	0.630871	0.605115	0.917747	0.700872	0.57641	0.541625	0.576325	0.52896
56.469	0.858122	0.604414	0.864057	0.793919	0.73228	0.464341	0.451796	0.576338	0.676148	0.731506	0.761129	0.625308	0.65831	0.856053	0.663612	0.608896	0.654759	0.690471	0.738181
56.808	0.797229	0.580426	0.88957	0.58068	0.695052	0.500552	0.458959	0.653919	0.541581	0.706888	0.656729	0.698012	0.802472	0.893867	0.625765	0.621629	0.684395	0.807078	0.619992
57.152	0.840823	0.654067	0.805076	0.549326	0.689052	0.541281	0.504178	0.547674	0.48011	0.477531	0.682201	0.554193	0.662223	0.80089	0.647629	0.657913	0.662245	0.639249	0.63904
57.494	1.04158	0.729501	0.921646	0.805248	0.709335	0.378476	0.446335	0.591213	0.512362	0.634166	0.779947	0.54245	0.521535	0.858113	0.677386	0.603972	0.699019	0.698269	0.639205
57.844	1.03421	0.691407	0.652768	0.61685	0.627288	0.552641	0.467964	0.718302	0.544878	0.699388	0.712674	0.559134	0.657718	0.835593	0.798062	0.635389	0.693577	0.61272	0.486604
58.186	0.931043	0.66075	0.785875	0.567529	0.607265	0.473238	0.433108	0.636914	0.641182	0.65962	0.67469	0.497549	0.569892	0.720981	0.699468	0.514556	0.581935	0.54402	0.582586
58.533	0.762073	0.634804	0.725951	0.518467	0.634871	0.612418	0.481286	0.642186	0.697728	0.754238	0.723363	0.62282	0.800525	0.883051	0.646451	0.615502	0.623403	0.728628	0.67734
58.873	0.739594	0.688262	0.590911	0.639105	0.729766	0.571513	0.435581	0.612554	0.746399	0.954195	0.819126	0.584056	0.722739	0.814367	0.651101	0.603924	0.639668	0.652371	0.787916
59.214	0.93759	0.447509	0.673687	0.531005	0.56824	0.500345	0.446145	0.603238	0.64352	0.614036	0.721016	0.63689	0.813426	0.827542	0.656076	0.594035	0.595411	0.835637	0.678073
59.573	0.782867	0.590975	0.837012	0.530565	0.65758	0.514338	0.42127	0.622829	0.690653	0.895344	0.759839	0.630996	0.701463	0.839842	0.645746	0.616907	0.627476	0.616715	0.577064
59.925	0.817496	0.628636	0.794999	0.706285	0.709855	0.418749	0.391276	0.654535	0.63646	0.76535	0.720039	0.532859	0.749835	0.911765	0.583873	0.585933	0.562362	0.760816	0.721237
60.254	0.660013	0.719183	0.682631	0.633985	0.681361	0.478318	0.45503	0.607027	0.585735	0.660719	0.656089	0.567938	0.772709	0.775471	0.672843	0.542703	0.584891	0.657805	0.683755
60.604	0.831713	0.626687	0.72661	0.659599	0.690041	0.542848	0.486174	0.614794	0.613265	0.74473	0.791989	0.52684	0.619949	0.76719	0.619456	0.660816	0.644187	1.00942	0.860622
60.945	0.863715	0.503719	0.77186	0.734297	0.635338	0.374298	0.389946	0.619041	0.656424	0.681932	0.630786	0.607999	0.715367	0.909559	0.753975	0.692946	0.590814	0.601794	0.575136
61.419	0.932157	0.550759	0.710099	0.583008	0.659719	0.641341	0.460517	0.706162	0.616814	0.816589	0.899947	0.579312	0.791073	0.719006	0.761177	0.740082	0.74352	0.67045	0.686501
61.647	0.877583	0.549159	0.728817	0.567305	0.669383	0.480196	0.506434	0.608571	0.683179	0.800944	0.658893	0.497803	0.65555	0.869996	0.85166	0.722172	0.6672	0.697027	0.627266
61.997	0.82313	0.437109	0.668925	0.586032	0.611827	0.54709	0.479413	0.628515	0.729317	0.718763	0.686636	0.589822	0.697373	0.762289	0.785819	0.686581	0.760349	0.705443	0.73057
62.338	0.747749	0.550238	0.721353	0.572007	0.609346	0.518166	0.479556	0.589888	0.590858	0.574689	0.662319	0.620331	0.689839	0.685427	0.630838	0.588596	0.626005	0.56517	0.556031
62.678	0.694023	0.548275	0.753356	0.590414	0.609968	0.650171	0.554884	0.697757	0.480083	0.72714	0.549813	0.641967	0.786504	1.0365	0.730606	0.601097	0.676799	0.586947	0.63632
63.039	0.980016	0.773322	0.791468	0.627402	0.719003	0.531218	0.56532	0.685692	0.609228	0.642073	0.727904	0.597234	0.686721	0.789179	0.691465	0.721385	0.72958	0.62846	0.707996
63.467	0.719746	0.569624	0.706381	0.530372	0.759595	0.572066	0.476466	0.67706	0.844245	0.897404	0.902195	0.548363	0.579542	0.745993	0.649973	0.55678	0.668084	0.696525	0.665594
63.796	0.70091	0.53371	0.828177	0.667673	0.719572	0.593485	0.542022	0.61664	0.630786	0.772993	0.838088	0.540771	0.654028	0.79522	0.77329	0.735403	0.731963	0.646847	0.694769
64.146	0.917056	0.678411	0.856526	0.543595	0.695741	0.517046	0.419943	0.652135	0.575238	0.79482	0.780021	0.451722	0.631214	0.784698	0.771592	0.614825	0.664804	0.748895	0.696929
64.489	1.00135	0.666993	0.65666	0.576081	0.640561	0.473629	0.495247	0.62493	0.622878	0.864462	0.743006	0.478285	0.664918	0.918939	0.73639	0.58549	0.668708	0.722545	0.703865
64.837	0.824811	0.684558	0.730284	0.49827	0.718018	0.573484	0.397158	0.736058	0.692305	0.949851	0.705514	0.619385	0.735489	0.933377	0.772834	0.654766	0.644767	0.562893	0.594556
65.198	0.928351	0.608682	0.808295	0.520266	0.658791	0.452539	0.48461	0.615086	0.600801	0.890715	0.679355	0.634433	0.771538	0.876693	0.69133	0.629322	0.678734	0.677133	0.669419
65.535	0.87021	0.506679	0.679996	0.74396	0.724809	0.432478	0.472248	0.51091	0.667632	0.67278	0.728473	0.57012	0.735179	0.923835	0.717172	0.660865	0.64793	0.540279	0.612121
65.874	0.687177	0.575188	0.805484	0.56134	0.677182	0.431156	0.387585	0.634773	0.604997	0.73136	0.760137	0.612371	0.719903	1.03752	0.740766	0.6099	0.683875	0.714215	0.744613
66.226	1.04277	0.612083	0.705158	0.728158	0.639348	0.568351	0.532133	0.736529	0.638285	0.807089	0.814906	0.615671	0.8125	0.990819	0.786701	0.65406	0.770355	0.626158	0.653854
66.566	0.926645	0.573993	0.89247	0.672194	0.721721	0.373854	0.426522	0.614461	0.571636	0.854616	0.849153	0.542698	0.727202	0.737152	0.811609	0.733685	0.743365	0.696637	0.73824
66.914	0.873775	0.560377	0.7164	0.587743	0.719502	0.431968	0.50399	0.6219	0.548209	0.818669	0.694763	0.588391	0.932317	0.992424	0.724272	0.71575	0.748427	0.737433	0.624023
67.266	1.03798	0.773241	0.857168	0.597348	0.691571	0.539462	0.496003	0.605135	0.703321	0.989742	0.736934	0.647311	0.837479	0.966606	0.784995	0.734442	0.724648	0.63728	0.66891
67.605	0.834485	0.58909	0.720912	0.705094	0.680766	0.52491	0.506647	0.576836	0.574223	0.618428	0.752494	0.641556	0.652643	0.857443	0.781863	0.755265	0.733632	0.640053	0.725793
67.956	0.924212	0.596374	0.762949	0.610815	0.776105	0.442234	0.446284	0.690929	0.595414	0.736346	0.780125	0.623409	0.678541	0.881661	0.772079	0.751488	0.632855	0.626755	0.706916
68.295	1.07702	0.643609	0.737321	0.682694	0.734431	0.501508	0.464716	0.685513	0.576033	0.721334	0.733084	0.62956	0.680779	0.945998	0.744034	0.732701	0.64267	0.653342	0.630291
68.645	1.14479	0.658691	0.763073	0.678152	0.688679	0.440043	0.480772	0.623948	0.580453	0.803926	0.771387	0.682891	1.03946	1.15784	0.631635	0.755417	0.739549	0.753133	0.685762
68.976	1.046	0.710894	0.705896	0.530789	0.618777	0.563105	0.481453	0.695095	0.566633	0.707579	0.832488	0.551001	0.745339	0.881159	0.777199	0.701945	0.776481	0.615506	0.62358
69.325	0.758037	0.663537	0.803937	0.78235	0.678388	0.444883	0.472411	0.547534	0.61267	0.829665	0.774105	0.693164	0.76063	0.892329	0.706963	0.640774	0.727912	0.820881	0.698796
69.786	0.806726	0.472278	0.742216	0.589438	0.743477	0.387819	0.564184	0.678596	0.664327	0.524949	0.673945	0.622714	0.769678	0.978224	0.768344	0.800538	0.79015	0.80582	0.80997
70.005	1.11128	0.555217	0.813697	0.572717	0.758543	0.469657	0.526536	0.617136	0.590557	0.831073	0.685967	0.56153	0.806507	0.891294	0.752113	0.645595	0.718468	0.705308	0.703919

## Sheet: 4D_Homo
time	1a.txt	1b.txt	1c.txt	2a.txt	2b.txt	2c.txt	9a.txt	9b.txt	9c.txt	11a.txt	11b.txt	11c.txt	15a.txt	15b.txt	15c.txt	17a.txt	17b.txt	17c.txt	24a.txt	24b.txt	24c.txt
0	0	0	0	0	0	0	0	0	0	0	0	0	0	0	0	0	0	0	0	0	0
0.351	0.00671025	0.00767181	-0.0175229	-0.0306402	0.02146	0.0531819	-0.0147706	0.0382072	0.0438549	0.0156416	0.0972695	0.0234006	-0.13789	0.0408894	-0.0859971	0.0985382	0.0415438	0.0400733	0.0703122	0.117965	0.123789
0.691	0.0594665	0.016307	0.0233762	0.0228599	0.0343316	0.1117	-0.0240316	0.0784909	-0.0279248	0.0675999	0.129041	0.045622	-0.12906	0.180278	0.0871674	0.0659318	0.0763818	0.011233	0.112485	0.112748	0.0920128
1.03	0.118225	0.123258	0.12586	0.082468	0.0344305	0.107551	-0.0841795	0.0625603	0.0973348	0.046461	0.330418	0.0726802	0.00955819	0.259144	0.103751	0.0673817	0.0851373	0.0748382	0.10355	0.0990965	0.0916486
1.385	0.0169902	0.0855462	0.103412	0.128077	0.0719225	0.0941142	0.0691875	0.135466	0.150152	0.0452089	0.144977	0.0657009	0.173868	0.25933	0.075693	0.122347	0.157831	0.0679442	0.102995	0.172687	0.16997
1.735	0.0230158	0.103164	0.0922619	0.106148	0.0919192	0.121381	-0.0170621	0.0433753	0.0290984	0.104285	0.170125	0.0994123	0.0246807	0.146583	0.0770094	0.119263	0.157896	0.0761965	0.152191	0.12709	0.0952744
2.075	0.096455	0.136882	0.0950682	0.147361	0.132492	0.147851	0.102648	0.165124	0.169329	0.0797156	0.240495	0.187255	-0.0692951	0.252503	0.168474	0.162729	0.153038	0.0620898	0.190893	0.172391	0.160807
2.418	0.0770387	0.0714614	0.135339	0.0817275	0.110259	0.111285	0.0772372	0.131651	0.0195068	0.13183	0.175752	0.138885	0.100515	0.190854	0.14456	0.175965	0.193897	0.111361	0.229193	0.243702	0.172021
2.766	0.10543	0.0810512	0.133147	0.167022	0.111651	0.137467	0.234488	0.300218	0.234021	0.123915	0.19292	0.222864	0.147808	0.306204	0.295283	0.149961	0.176072	0.149468	0.20533	0.21282	0.245317
3.106	0.173797	0.161699	0.237583	0.204673	0.123401	0.164916	0.14184	0.270101	0.122569	0.157015	0.238936	0.113026	0.179992	0.219108	0.321895	0.180147	0.213553	0.102513	0.30416	0.24145	0.309953
3.457	0.204868	0.188243	0.2102	0.157193	0.152929	0.181939	0.172844	0.181994	0.248113	0.130992	0.207772	0.191958	0.241387	0.224325	0.255189	0.147689	0.194925	0.149944	0.316696	0.234179	0.274739
3.787	0.183027	0.122319	0.248684	0.184688	0.138105	0.136639	0.157927	0.118161	0.121542	0.162763	0.284573	0.159025	0.316497	0.40623	0.185648	0.160335	0.245872	0.177557	0.279442	0.247041	0.31615
4.135	0.189744	0.237313	0.252077	0.251812	0.186803	0.201228	0.0605086	0.113513	0.185348	0.1618	0.290305	0.245267	-0.0213487	0.192691	0.0757801	0.244919	0.293379	0.179205	0.36776	0.292794	0.347569
4.47	0.164772	0.204474	0.29633	0.197737	0.168673	0.175569	0.160956	0.116724	0.143052	0.153187	0.250065	0.238085	0.163229	0.27207	0.103559	0.180134	0.224871	0.200919	0.312375	0.254578	0.330938
4.841	0.195221	0.174623	0.22216	0.212443	0.22312	0.163509	0.121365	0.264323	0.103661	0.115288	0.323764	0.224595	0.204465	0.24553	0.227524	0.244309	0.259681	0.215353	0.350314	0.217949	0.277155
5.241	0.19273	0.22569	0.260603	0.31731	0.191068	0.229346	0.158041	0.302157	0.290056	0.190036	0.283559	0.28011	0.269824	0.184739	0.263011	0.198292	0.251411	0.259592	0.323625	0.285874	0.347943
5.581	0.265151	0.257087	0.322425	0.332206	0.252535	0.300258	0.120104	0.188628	0.201502	0.234047	0.212785	0.2494	0.261047	0.304806	0.279131	0.276331	0.278972	0.208636	0.380355	0.376396	0.350679
5.92	0.21777	0.19274	0.38738	0.268026	0.24319	0.243587	0.197111	0.164141	0.200513	0.184125	0.260293	0.319967	0.221067	0.277313	0.489029	0.280123	0.309466	0.24038	0.395476	0.29122	0.376088
6.272	0.20656	0.211628	0.242162	0.192864	0.228753	0.265378	0.0710439	0.0894871	0.108236	0.213433	0.371241	0.342995	0.253251	0.212109	0.247731	0.254458	0.314709	0.291764	0.347436	0.326418	0.346781
6.621	0.287	0.290079	0.301945	0.186835	0.216675	0.247525	0.190095	0.203124	0.235575	0.192414	0.334222	0.338699	0.3298	0.201586	0.233254	0.318111	0.357512	0.254639	0.332306	0.252207	0.404288
6.95	0.176817	0.237387	0.282462	0.231885	0.211314	0.275372	0.159253	0.297932	0.252885	0.199642	0.42327	0.26096	0.274148	0.331834	0.35799	0.205888	0.325913	0.248787	0.402686	0.351593	0.502079
7.301	0.16791	0.214963	0.315066	0.304887	0.270628	0.265453	0.255547	0.296522	0.2919	0.169446	0.356193	0.286113	0.244601	0.288278	0.256638	0.229293	0.253332	0.2568	0.361533	0.314475	0.481622
7.646	0.307066	0.29053	0.32354	0.341543	0.25748	0.244847	0.197075	0.270817	0.189171	0.198018	0.336562	0.355801	0.288658	0.205179	0.287103	0.198989	0.312354	0.253584	0.317969	0.267676	0.419107
7.985	0.353429	0.22935	0.421273	0.269988	0.268723	0.200871	0.195023	0.30414	0.218104	0.179092	0.393823	0.289196	0.15567	0.208718	0.284911	0.310977	0.397898	0.329946	0.32545	0.304433	0.373018
8.325	0.22852	0.273984	0.257361	0.36872	0.272508	0.335951	0.263955	0.231275	0.338239	0.22667	0.428633	0.349047	0.128178	0.253875	0.154477	0.308788	0.410893	0.364661	0.466034	0.376333	0.470929
8.675	0.295305	0.244631	0.25136	0.261989	0.289646	0.263076	0.241348	0.201062	0.219318	0.206046	0.377977	0.403018	0.469165	0.178246	0.098882	0.355984	0.364101	0.319284	0.497394	0.450928	0.584957
9.025	0.271556	0.304064	0.393526	0.318788	0.269405	0.290657	0.151047	0.22805	0.278349	0.26585	0.305041	0.372042	0.437374	0.404339	0.517305	0.25891	0.352508	0.270713	0.495342	0.349562	0.417647
9.363	0.288422	0.316624	0.278913	0.28174	0.315597	0.254824	0.206281	0.259359	0.262712	0.217245	0.364847	0.358772	0.546993	0.479328	0.40287	0.328964	0.362982	0.308681	0.421739	0.36916	0.419583
9.706	0.303559	0.302166	0.342381	0.286122	0.239331	0.262359	0.261196	0.299603	0.349789	0.255907	0.440329	0.390622	0.309921	0.270092	0.365676	0.331656	0.424042	0.387065	0.372933	0.354667	0.349753
10.045	0.277012	0.241284	0.296076	0.316761	0.283699	0.361404	0.250435	0.342868	0.312286	0.242957	0.425515	0.353517	0.368191	0.474907	0.355011	0.299411	0.330299	0.305691	0.50322	0.337869	0.464583
10.396	0.342231	0.311356	0.409169	0.296671	0.282587	0.323452	0.260969	0.220227	0.298872	0.240656	0.368928	0.307034	0.238351	0.316016	0.276843	0.297383	0.363711	0.297667	0.491725	0.384927	0.387715
10.8	0.36329	0.359201	0.389429	0.277859	0.254072	0.344285	0.220335	0.214324	0.274658	0.257612	0.356703	0.378556	0.3322	0.323027	0.442985	0.384589	0.426394	0.378665	0.442238	0.384682	0.393894
11.07	0.257743	0.298261	0.317203	0.369976	0.291524	0.294332	0.294952	0.276743	0.334732	0.252498	0.408472	0.380258	0.304224	0.405	0.359185	0.32043	0.414738	0.349849	0.445688	0.342592	0.456243
11.419	0.311724	0.236936	0.322579	0.29138	0.352469	0.30337	0.230826	0.2876	0.344193	0.281904	0.372665	0.428494	0.344387	0.355002	0.460544	0.359372	0.408274	0.388746	0.403341	0.363441	0.421734
11.759	0.307654	0.270408	0.362146	0.332504	0.313803	0.332152	0.279883	0.284446	0.290884	0.253445	0.457815	0.412426	0.383348	0.279942	0.34379	0.306203	0.392927	0.328922	0.44851	0.414714	0.449098
12.119	0.240901	0.33913	0.307854	0.220429	0.254976	0.248841	0.31402	0.255879	0.350047	0.219991	0.378864	0.396674	0.511996	0.401383	0.437329	0.38423	0.40072	0.384391	0.437067	0.356407	0.47157
12.448	0.310628	0.27901	0.365376	0.268044	0.280582	0.349372	0.3448	0.263418	0.292383	0.313153	0.495116	0.319957	0.617364	0.429633	0.64156	0.368492	0.458054	0.383976	0.450191	0.390562	0.440826
12.785	0.25695	0.265981	0.347605	0.354181	0.328765	0.361048	0.381935	0.318014	0.389693	0.231886	0.252249	0.406153	0.520334	0.439412	0.295961	0.366364	0.449889	0.359572	0.465541	0.386769	0.458767
13.129	0.358381	0.285421	0.362015	0.320664	0.291231	0.309545	0.361268	0.20877	0.403271	0.251194	0.431788	0.390329	0.24541	0.303645	0.228786	0.303225	0.426634	0.376558	0.431846	0.347831	0.469437
13.469	0.347372	0.331141	0.394533	0.333991	0.342841	0.269211	0.322721	0.229341	0.367424	0.314053	0.506767	0.465828	0.219133	0.298646	0.259674	0.382297	0.389457	0.399855	0.442187	0.367792	0.417151
13.829	0.276537	0.307916	0.35894	0.372082	0.418646	0.31659	0.249446	0.249572	0.266033	0.306562	0.378212	0.402995	0.530318	0.355827	0.475794	0.337379	0.438544	0.417996	0.455162	0.416544	0.464772
14.169	0.260746	0.348295	0.376458	0.366531	0.371053	0.358906	0.260775	0.25798	0.248059	0.275608	0.503609	0.448901	0.0910467	0.303064	0.391644	0.323688	0.395384	0.343333	0.446432	0.432542	0.432116
14.509	0.355425	0.260936	0.369237	0.338878	0.36336	0.44364	0.337729	0.443979	0.358559	0.303207	0.462849	0.366291	0.65176	0.446692	0.356885	0.293641	0.415523	0.356105	0.424575	0.425777	0.409737
14.85	0.318503	0.330566	0.405903	0.355289	0.326774	0.373265	0.322549	0.213104	0.203057	0.314759	0.48891	0.446371	0.340104	0.436035	0.352505	0.344957	0.444529	0.375763	0.408679	0.375917	0.459878
15.189	0.335536	0.307262	0.317105	0.294448	0.334543	0.283149	0.31133	0.341492	0.361062	0.2988	0.494009	0.439987	0.326385	0.391198	0.528711	0.362692	0.425038	0.418708	0.446345	0.352167	0.408341
15.55	0.329647	0.300466	0.387563	0.334172	0.388118	0.364337	0.280679	0.315756	0.382026	0.352004	0.391546	0.478331	0.41937	0.569285	0.358881	0.363876	0.50915	0.446008	0.537942	0.403698	0.530497
15.989	0.460135	0.38631	0.50306	0.300017	0.318131	0.339953	0.369061	0.290408	0.444248	0.296479	0.478873	0.450599	0.247919	0.405238	0.538084	0.383275	0.514243	0.433718	0.501244	0.410984	0.462253
16.238	0.45367	0.38961	0.447639	0.43844	0.427006	0.394546	0.397773	0.392931	0.461126	0.270564	0.482815	0.445999	0.502097	0.501717	0.380222	0.364157	0.42638	0.397414	0.454032	0.369086	0.431396
16.59	0.377253	0.316617	0.422489	0.438949	0.385542	0.370242	0.339562	0.278453	0.420874	0.306294	0.387776	0.473703	0.517314	0.428353	0.713615	0.444627	0.430046	0.417791	0.514712	0.353235	0.444985
16.93	0.42461	0.320558	0.406147	0.331057	0.376238	0.333835	0.438733	0.421238	0.379859	0.306003	0.487422	0.516096	0.430425	0.418251	0.574711	0.470844	0.45599	0.397163	0.503738	0.408429	0.445305
17.28	0.348697	0.330955	0.367748	0.329196	0.38118	0.395427	0.2968	0.297443	0.317968	0.324216	0.420972	0.443457	0.243918	0.307466	0.263763	0.397894	0.44212	0.363633	0.620351	0.498249	0.504093
17.63	0.408681	0.36455	0.471876	0.428787	0.379711	0.335952	0.340662	0.302644	0.47654	0.35994	0.520211	0.484695	0.410135	0.277817	0.476459	0.372927	0.453047	0.365122	0.517729	0.415089	0.48024
17.968	0.347395	0.425184	0.295287	0.334509	0.365721	0.36569	0.343086	0.285209	0.324033	0.271438	0.459667	0.375367	0.439309	0.368359	0.456839	0.483011	0.500034	0.403582	0.464599	0.389822	0.406173
18.318	0.376515	0.426749	0.421155	0.401265	0.398205	0.344427	0.310764	0.336646	0.358276	0.351715	0.4633	0.46353	0.410235	0.353499	0.385668	0.389072	0.443709	0.399192	0.64328	0.536065	0.569185
18.659	0.378685	0.458593	0.422305	0.434099	0.379592	0.337443	0.344082	0.30346	0.336084	0.325057	0.428234	0.530226	0.253526	0.383569	0.385858	0.399498	0.490969	0.442832	0.496393	0.43165	0.479897
19.011	0.469345	0.367531	0.433025	0.349103	0.352936	0.393166	0.375722	0.293404	0.318734	0.401499	0.57526	0.649643	0.465438	0.381608	0.36917	0.436762	0.492943	0.417434	0.528788	0.331211	0.519101
19.34	0.446533	0.366005	0.457389	0.386208	0.394153	0.403422	0.245935	0.311889	0.398392	0.407969	0.505902	0.521324	0.678395	0.502354	0.573946	0.430595	0.456328	0.396276	0.582569	0.473685	0.462374
19.689	0.422588	0.373911	0.514472	0.380872	0.343095	0.401956	0.327467	0.390134	0.453586	0.343003	0.449287	0.423923	0.447599	0.368019	0.443779	0.404719	0.467394	0.443477	0.527033	0.367951	0.418744
20.03	0.375766	0.415572	0.402319	0.337754	0.382717	0.325124	0.347944	0.231293	0.347597	0.371917	0.47862	0.416318	0.419951	0.424158	0.420281	0.396196	0.495247	0.399106	0.528908	0.432634	0.455596
20.369	0.368284	0.443911	0.46912	0.461742	0.478742	0.456087	0.366616	0.356733	0.368097	0.317637	0.455806	0.484905	0.29424	0.292556	0.374749	0.441002	0.532345	0.466733	0.520919	0.469005	0.460943
20.721	0.328731	0.413899	0.394216	0.393706	0.422837	0.403559	0.491962	0.307451	0.428281	0.367283	0.459788	0.459685	0.632533	0.447054	0.533198	0.423435	0.517285	0.444074	0.481705	0.360859	0.419621
21.052	0.329497	0.382572	0.49505	0.361235	0.435608	0.376247	0.355146	0.336539	0.38858	0.335722	0.5128	0.44201	0.5378	0.481051	0.497872	0.432673	0.503897	0.476068	0.529266	0.453498	0.425696
21.4	0.380733	0.339364	0.451418	0.401812	0.454669	0.396015	0.402164	0.269864	0.341122	0.390227	0.344458	0.529844	0.60836	0.415874	0.545704	0.42473	0.487292	0.468145	0.514236	0.47273	0.423808
21.75	0.452146	0.374168	0.384089	0.343008	0.400997	0.36638	0.412129	0.399412	0.480308	0.409497	0.595711	0.659952	0.405973	0.499008	0.410441	0.431884	0.46491	0.434986	0.522982	0.400818	0.501938
22.089	0.442363	0.421562	0.433965	0.382158	0.399204	0.383008	0.33084	0.366287	0.436038	0.387653	0.578688	0.602167	0.384587	0.346618	0.442221	0.388641	0.532895	0.467908	0.538643	0.443488	0.550726
22.439	0.51407	0.426481	0.56492	0.384609	0.480637	0.472439	0.237752	0.260905	0.271419	0.401535	0.574362	0.562617	0.478638	0.570714	0.422864	0.470642	0.495281	0.531109	0.572611	0.462015	0.554677
22.774	0.389017	0.410114	0.390609	0.331083	0.379965	0.44789	0.35795	0.413029	0.398955	0.404105	0.613839	0.670299	0.753832	0.563674	0.567745	0.4127	0.534708	0.513083	0.535199	0.465135	0.498868
23.128	0.397575	0.316228	0.464038	0.348948	0.405628	0.412561	0.232566	0.310344	0.276351	0.416691	0.56715	0.524206	0.389412	0.573313	0.561256	0.389188	0.415669	0.35772	0.542069	0.482533	0.592488
23.462	0.418151	0.402827	0.469499	0.409909	0.455779	0.487651	0.362802	0.360152	0.542646	0.386315	0.487206	0.605552	0.477569	0.394401	0.47987	0.506971	0.521995	0.456103	0.682679	0.532195	0.565762
23.812	0.352661	0.421438	0.41748	0.406859	0.453045	0.466839	0.458629	0.465196	0.474344	0.41737	0.619796	0.491422	0.753975	0.45089	0.485073	0.445879	0.55936	0.505197	0.530076	0.420794	0.525599
24.15	0.475737	0.466004	0.444369	0.395564	0.414568	0.469152	0.366145	0.259818	0.445557	0.363235	0.450949	0.614241	0.422091	0.472468	0.477846	0.438632	0.522859	0.478722	0.535413	0.489058	0.509184
24.493	0.414358	0.459309	0.520226	0.388591	0.450006	0.400658	0.431339	0.423621	0.499486	0.254144	0.445048	0.51091	0.450284	0.563751	0.611969	0.444341	0.549161	0.514335	0.477419	0.358053	0.526114
24.842	0.359413	0.451686	0.561983	0.423596	0.430737	0.400367	0.250725	0.242881	0.371646	0.376393	0.506749	0.544059	0.269813	0.351269	0.564324	0.421874	0.471867	0.486592	0.488724	0.41389	0.479402
25.171	0.367701	0.458816	0.500141	0.291516	0.413517	0.44389	0.472239	0.384746	0.388707	0.415272	0.554761	0.577002	0.668292	0.585156	0.64683	0.490772	0.493918	0.469493	0.575773	0.458009	0.505719
25.522	0.445618	0.364289	0.540362	0.408279	0.399456	0.406953	0.490932	0.418163	0.567096	0.339768	0.509076	0.494657	0.380658	0.434639	0.513253	0.472591	0.508579	0.515775	0.558388	0.425271	0.483883
25.863	0.462557	0.482285	0.549471	0.476888	0.47822	0.426345	0.359322	0.432381	0.384796	0.355995	0.641908	0.512378	0.495971	0.423498	0.710765	0.460384	0.537998	0.437698	0.653182	0.495808	0.575385
26.205	0.417397	0.426862	0.453024	0.475261	0.466803	0.47435	0.41064	0.389717	0.418622	0.333941	0.4313	0.465242	0.534431	0.56809	0.608959	0.439922	0.461271	0.514516	0.572836	0.451078	0.663259
26.555	0.386754	0.378367	0.449488	0.446698	0.494128	0.464945	0.442253	0.38036	0.442972	0.358712	0.458225	0.470422	0.377924	0.357164	0.545331	0.456174	0.526035	0.484226	0.610133	0.497121	0.579798
26.896	0.492139	0.481297	0.510552	0.335144	0.496659	0.397869	0.547589	0.371312	0.35172	0.402075	0.52359	0.590035	0.703456	0.568952	0.750534	0.469931	0.512393	0.478668	0.583953	0.502389	0.603496
27.239	0.357606	0.394493	0.487072	0.412404	0.433926	0.389443	0.360871	0.26691	0.398297	0.382435	0.591252	0.585529	0.528096	0.564801	0.465717	0.426746	0.488712	0.542464	0.532826	0.442806	0.578336
27.589	0.421696	0.464972	0.407521	0.480644	0.494074	0.541465	0.44185	0.313067	0.605871	0.358119	0.441378	0.466853	0.585607	0.426321	0.592978	0.423089	0.497736	0.416481	0.630026	0.520511	0.583884
27.928	0.47429	0.406107	0.506347	0.465965	0.50093	0.451138	0.42493	0.313919	0.496953	0.353611	0.562704	0.5356	0.421256	0.663131	0.688876	0.454409	0.482085	0.506264	0.58698	0.493928	0.546968
28.388	0.397144	0.36685	0.543198	0.311185	0.445816	0.414759	0.428835	0.309311	0.447924	0.410155	0.465426	0.536741	0.595368	0.486765	0.631048	0.451979	0.520673	0.42441	0.601475	0.49812	0.599225
28.609	0.455077	0.476346	0.585757	0.422939	0.467491	0.45514	0.629779	0.409108	0.534546	0.394676	0.483341	0.617387	0.511568	0.447661	0.455552	0.389538	0.475485	0.441807	0.533564	0.514401	0.556994
28.958	0.4939	0.500119	0.506868	0.269114	0.396292	0.427807	0.626497	0.527303	0.494677	0.384552	0.611311	0.548032	0.625939	0.589426	0.512666	0.459837	0.504858	0.501467	0.618878	0.473016	0.592415
29.297	0.504289	0.477683	0.48482	0.474809	0.468132	0.443764	0.490332	0.472742	0.561856	0.380201	0.504468	0.569091	0.290327	0.411889	0.689018	0.462455	0.551746	0.507967	0.63666	0.504356	0.619656
29.638	0.424774	0.467206	0.500665	0.391047	0.485718	0.366326	0.468773	0.365228	0.58546	0.39344	0.479998	0.499815	0.44979	0.467804	0.358819	0.513077	0.54347	0.503515	0.594458	0.46126	0.675235
29.987	0.441093	0.416983	0.529638	0.385361	0.445759	0.429159	0.449518	0.277772	0.346499	0.385105	0.614834	0.527331	0.342993	0.403492	0.56081	0.490159	0.570263	0.47587	0.560489	0.495143	0.64675
30.327	0.438103	0.47883	0.500089	0.388255	0.470687	0.365786	0.502398	0.399901	0.334131	0.398054	0.484886	0.551388	0.446518	0.498251	0.573527	0.505822	0.57204	0.53623	0.570516	0.496854	0.596073
30.668	0.436708	0.445056	0.457751	0.481904	0.472506	0.463083	0.474639	0.383832	0.346023	0.366583	0.521471	0.507235	0.393558	0.472698	0.617062	0.455619	0.496563	0.495773	0.597467	0.522898	0.667584
31.016	0.422111	0.512017	0.521774	0.473688	0.543265	0.499217	0.517982	0.329734	0.448502	0.337255	0.593756	0.625748	0.48605	0.388279	0.569706	0.447344	0.51622	0.48688	0.639039	0.484814	0.620424
31.358	0.37236	0.400691	0.516551	0.429883	0.496303	0.511614	0.534988	0.391084	0.578022	0.435796	0.563905	0.480458	0.615276	0.480902	0.673497	0.498546	0.570881	0.618168	0.521995	0.4802	0.582889
31.708	0.428642	0.481765	0.525281	0.482877	0.58449	0.405756	0.542043	0.346188	0.568216	0.43822	0.634645	0.608926	0.533134	0.529365	0.574849	0.453232	0.467002	0.448302	0.676344	0.511731	0.696621
32.037	0.499496	0.549544	0.483434	0.396267	0.482549	0.400915	0.489668	0.434944	0.482343	0.384606	0.594952	0.533622	0.272271	0.334216	0.523717	0.443311	0.519677	0.491228	0.559749	0.547615	0.525646
32.388	0.384913	0.411411	0.435716	0.469919	0.519864	0.51135	0.413465	0.428636	0.417459	0.40247	0.649439	0.530991	0.517421	0.550203	0.551891	0.515145	0.575954	0.528519	0.623987	0.480091	0.555297
32.728	0.517451	0.553136	0.546374	0.480728	0.529912	0.47429	0.412252	0.433107	0.511611	0.426132	0.611667	0.520152	0.655155	0.602668	0.891449	0.51051	0.521384	0.464923	0.563049	0.557833	0.590293
33.068	0.414541	0.38236	0.534285	0.416859	0.447998	0.50544	0.432401	0.320955	0.463461	0.389304	0.570009	0.610708	0.307528	0.462821	0.520139	0.508786	0.531459	0.499323	0.55491	0.581919	0.638168
33.418	0.44055	0.417441	0.473513	0.429693	0.480079	0.497431	0.499375	0.436505	0.533613	0.375476	0.520019	0.587373	0.404178	0.509964	0.63314	0.435908	0.513188	0.456363	0.545907	0.526678	0.611132
33.758	0.519322	0.488666	0.504796	0.408585	0.564684	0.475846	0.380051	0.403369	0.529081	0.39483	0.595741	0.596509	0.395102	0.487167	0.579244	0.434808	0.483882	0.502495	0.630081	0.55704	0.640359
34.109	0.361915	0.465072	0.528582	0.407921	0.591573	0.450634	0.474925	0.473757	0.503925	0.411933	0.554373	0.594047	0.513571	0.429136	0.49773	0.666042	0.57978	0.537015	0.611578	0.569412	0.718287
34.447	0.567113	0.461822	0.614073	0.424975	0.541007	0.434361	0.609548	0.457727	0.533323	0.451533	0.531363	0.479338	0.517423	0.377964	0.551053	0.519123	0.499135	0.511637	0.527371	0.502502	0.645875
34.787	0.444298	0.469956	0.492669	0.474324	0.493046	0.517537	0.625265	0.440682	0.588569	0.421784	0.553103	0.562429	0.496184	0.446396	0.57931	0.538019	0.613162	0.527155	0.722685	0.590867	0.744724
35.139	0.434129	0.50016	0.522007	0.427781	0.531562	0.47575	0.509228	0.470179	0.646298	0.422462	0.598794	0.544909	0.448226	0.497052	0.53924	0.446236	0.52153	0.499644	0.690574	0.621311	0.666921
35.588	0.528084	0.480666	0.48053	0.492883	0.558599	0.478802	0.412425	0.212461	0.382103	0.4087	0.56035	0.549818	0.760034	0.558384	0.52104	0.460108	0.523033	0.478305	0.663584	0.57415	0.708716
35.818	0.498674	0.478142	0.555089	0.313958	0.447005	0.416631	0.529858	0.306112	0.410152	0.420003	0.654587	0.586149	0.394447	0.433555	0.485855	0.542991	0.530256	0.601585	0.655127	0.534382	0.724775
36.159	0.502553	0.475257	0.624438	0.562364	0.591581	0.569236	0.405962	0.333822	0.446667	0.438895	0.601499	0.619898	0.464921	0.385227	0.406254	0.495649	0.583227	0.503851	0.568627	0.505857	0.613626
36.508	0.467641	0.523015	0.480821	0.372997	0.48304	0.487176	0.602271	0.506952	0.464705	0.414204	0.664991	0.617609	0.528056	0.588911	0.726307	0.538318	0.597274	0.486241	0.623905	0.46804	0.614629
36.859	0.449683	0.53316	0.514658	0.344573	0.459176	0.459897	0.570495	0.459343	0.559107	0.422819	0.595249	0.47567	0.543509	0.505471	0.647492	0.470169	0.587265	0.527697	0.63047	0.55964	0.681855
37.208	0.43816	0.481297	0.546725	0.464828	0.573351	0.560858	0.391053	0.400196	0.479442	0.429916	0.602626	0.619813	0.754156	0.495957	0.685874	0.498025	0.585994	0.531989	0.652206	0.445705	0.692103
37.547	0.496493	0.552968	0.484671	0.389841	0.514677	0.443104	0.45423	0.436653	0.503682	0.36758	0.745012	0.586654	0.462523	0.518238	0.526643	0.5107	0.624701	0.57133	0.615144	0.522907	0.575778
37.889	0.42145	0.523221	0.567475	0.350826	0.511059	0.482618	0.616554	0.375676	0.647544	0.457022	0.636398	0.655336	0.629016	0.543301	0.729413	0.6087	0.586869	0.569965	0.516252	0.494446	0.615318
38.228	0.45005	0.426973	0.49461	0.440237	0.516695	0.550895	0.370713	0.303026	0.41971	0.372599	0.558122	0.573436	0.437848	0.563906	0.594128	0.482028	0.559072	0.562952	0.662242	0.499942	0.648294
38.589	0.435983	0.448634	0.5384	0.428494	0.56786	0.490011	0.42071	0.400487	0.501031	0.347165	0.524707	0.595267	0.744058	0.699862	0.680582	0.538834	0.541899	0.528331	0.665246	0.508761	0.619837
38.937	0.499324	0.488246	0.474486	0.473426	0.544188	0.519175	0.443455	0.431681	0.470366	0.450363	0.760011	0.700908	0.400198	0.484642	0.64173	0.470712	0.551618	0.45156	0.659824	0.549015	0.661615
39.277	0.472751	0.482627	0.525455	0.350543	0.497223	0.432724	0.482147	0.348541	0.464508	0.436573	0.662789	0.60007	0.640243	0.488624	0.569323	0.517639	0.540904	0.545376	0.670427	0.511447	0.74891
39.623	0.535874	0.511926	0.560734	0.497844	0.571062	0.485696	0.635269	0.443424	0.657275	0.411295	0.660077	0.716672	0.461439	0.508901	0.555246	0.566874	0.601189	0.620038	0.642837	0.504927	0.601427
39.964	0.450674	0.415934	0.539758	0.566986	0.583505	0.622843	0.492045	0.388154	0.516914	0.498137	0.612719	0.602266	0.5355	0.599904	0.670521	0.57283	0.545512	0.637995	0.52212	0.489112	0.639125
40.314	0.383817	0.477359	0.409662	0.436465	0.596011	0.609223	0.596401	0.425956	0.467927	0.476003	0.72576	0.646605	0.408196	0.537706	0.632053	0.473491	0.59166	0.534288	0.590385	0.561715	0.722548
40.655	0.454674	0.469514	0.597782	0.50638	0.564824	0.491599	0.56825	0.413504	0.554114	0.484917	0.653668	0.699852	0.36863	0.408209	0.649543	0.487851	0.547946	0.507394	0.652566	0.474136	0.579013
40.995	0.517424	0.473701	0.558891	0.451991	0.617965	0.46573	0.608106	0.393815	0.443122	0.428436	0.605314	0.54341	0.679936	0.580059	0.592966	0.496603	0.613701	0.558093	0.676235	0.496672	0.681883
41.334	0.575414	0.472641	0.527334	0.533758	0.542059	0.541036	0.555579	0.528429	0.567215	0.458419	0.643996	0.685881	0.54657	0.578913	0.611835	0.574851	0.64217	0.614079	0.644369	0.608211	0.662765
41.797	0.647599	0.607306	0.619109	0.616467	0.62481	0.618822	0.552605	0.398108	0.531697	0.452135	0.72115	0.801574	0.415441	0.515925	0.520104	0.481926	0.572411	0.561469	0.64944	0.591476	0.645722
42.027	0.52021	0.430317	0.451513	0.449932	0.547868	0.551961	0.410329	0.404241	0.546325	0.452397	0.557468	0.637585	0.614077	0.43239	0.569486	0.502656	0.536041	0.551388	0.665766	0.522996	0.641815
42.368	0.495337	0.495636	0.524406	0.49499	0.551733	0.52815	0.493346	0.414179	0.482561	0.426346	0.567488	0.630168	0.432955	0.446843	0.656225	0.622349	0.602847	0.518263	0.63281	0.44814	0.656433
42.717	0.461173	0.486527	0.610101	0.406419	0.532127	0.532246	0.521364	0.403865	0.584199	0.432599	0.567967	0.60899	0.402919	0.480211	0.719219	0.520377	0.596567	0.609942	0.685016	0.581786	0.695081
43.06	0.528751	0.398334	0.421299	0.4751	0.486863	0.448099	0.641201	0.44762	0.661621	0.434106	0.47519	0.58961	0.515073	0.601628	0.701074	0.581544	0.643368	0.68091	0.78849	0.586458	0.637607
43.399	0.406879	0.515397	0.580681	0.45989	0.568315	0.471467	0.526581	0.484377	0.448112	0.487991	0.646998	0.615495	0.742963	0.535206	0.678613	0.492094	0.551279	0.500015	0.619223	0.47699	0.526949
43.748	0.461477	0.479942	0.545094	0.497389	0.561125	0.462083	0.487248	0.434837	0.525439	0.513467	0.68865	0.721094	0.521857	0.548311	0.780027	0.539579	0.565466	0.535439	0.655555	0.509701	0.626512
44.089	0.4422	0.466212	0.560636	0.577602	0.565171	0.542665	0.496169	0.537808	0.531539	0.464012	0.533967	0.663377	0.411824	0.55995	0.654425	0.546328	0.643641	0.587505	0.619321	0.513217	0.627552
44.438	0.555454	0.50098	0.548314	0.417643	0.547048	0.451993	0.508502	0.369802	0.492076	0.462152	0.590052	0.731644	0.578222	0.551947	0.53076	0.538569	0.573317	0.500994	0.669514	0.49144	0.649345
44.779	0.452753	0.443916	0.543394	0.428073	0.570965	0.550255	0.568487	0.529499	0.53217	0.435936	0.584115	0.640876	0.653365	0.601372	0.575891	0.5696	0.54458	0.540057	0.673255	0.511521	0.688426
45.138	0.519733	0.438622	0.609441	0.346207	0.624571	0.514685	0.602672	0.452761	0.442428	0.43012	0.664797	0.640897	0.683929	0.399035	0.644321	0.507837	0.558322	0.498856	0.659263	0.477179	0.636053
45.477	0.4043	0.530962	0.498356	0.476413	0.539203	0.600334	0.610811	0.559101	0.608763	0.382319	0.615844	0.553659	0.605402	0.714595	0.873232	0.59434	0.564977	0.550932	0.682475	0.539894	0.661095
45.819	0.496116	0.402916	0.555924	0.428056	0.576974	0.473779	0.535789	0.388406	0.525632	0.437248	0.660543	0.727077	0.492002	0.368996	0.673381	0.465875	0.635965	0.576192	0.724626	0.54909	0.771327
46.158	0.502836	0.50138	0.609192	0.445687	0.63237	0.540058	0.536309	0.367635	0.525979	0.408934	0.737636	0.640342	0.4669	0.527232	0.759133	0.511632	0.591547	0.480599	0.626502	0.461098	0.631883
46.498	0.590867	0.479399	0.557036	0.520367	0.65723	0.500721	0.600925	0.495404	0.59831	0.503097	0.671364	0.673046	0.469344	0.47981	0.578256	0.552745	0.588837	0.526899	0.630468	0.524138	0.6589
46.848	0.60359	0.555144	0.572901	0.466233	0.511389	0.425875	0.450661	0.541689	0.45246	0.43236	0.619879	0.680988	0.332046	0.563879	0.419812	0.474044	0.568655	0.481992	0.659877	0.565972	0.685054
47.198	0.486945	0.517126	0.521533	0.436266	0.516771	0.589635	0.348518	0.391823	0.632079	0.502193	0.756537	0.786715	0.438388	0.588312	0.66154	0.500304	0.580895	0.470943	0.664115	0.509973	0.671256
47.538	0.461302	0.473292	0.528355	0.549441	0.58585	0.499058	0.500669	0.552987	0.563607	0.462639	0.544491	0.703338	0.739884	0.603691	0.713852	0.524366	0.584736	0.579195	0.713062	0.533702	0.713194
47.877	0.674403	0.527947	0.693202	0.419433	0.575848	0.535479	0.570023	0.342843	0.626877	0.414926	0.63132	0.645319	0.5938	0.528879	0.67357	0.546815	0.592058	0.529727	0.680589	0.501585	0.664349
48.217	0.563705	0.495146	0.528649	0.4194	0.601139	0.559219	0.541159	0.405198	0.516147	0.419779	0.670777	0.533472	0.594524	0.727679	0.765181	0.540512	0.611666	0.54149	0.62463	0.479802	0.680032
48.557	0.520944	0.500977	0.50329	0.604928	0.671473	0.648855	0.434643	0.296238	0.522033	0.446993	0.566811	0.672832	0.339469	0.456986	0.647721	0.545053	0.611334	0.586268	0.690558	0.513168	0.634682
48.908	0.506735	0.433494	0.529165	0.538471	0.58987	0.507155	0.499252	0.460092	0.650955	0.379615	0.615668	0.64572	0.384077	0.548534	0.790186	0.585596	0.593473	0.60965	0.610945	0.502822	0.616886
49.246	0.593335	0.621485	0.555403	0.490783	0.645844	0.565797	0.613089	0.46698	0.591682	0.489028	0.684853	0.552303	0.470809	0.406278	0.660433	0.546187	0.617077	0.619365	0.727552	0.513456	0.650194
49.586	0.541174	0.510177	0.53916	0.419514	0.603345	0.497832	0.478036	0.424994	0.503605	0.416025	0.561091	0.587545	0.550626	0.582833	0.581322	0.585312	0.629441	0.558291	0.614807	0.493917	0.665468
49.936	0.505649	0.573481	0.542331	0.384077	0.521586	0.520643	0.479672	0.302162	0.492164	0.424036	0.707064	0.639012	0.557925	0.476188	0.714655	0.469181	0.552947	0.540965	0.64882	0.647314	0.779082
50.276	0.479427	0.513813	0.593657	0.484757	0.597091	0.613499	0.444239	0.3664	0.499955	0.413167	0.629032	0.690658	0.244258	0.407302	0.488914	0.509516	0.59736	0.549409	0.629352	0.557971	0.668809
50.638	0.542921	0.499296	0.577316	0.427157	0.645574	0.581921	0.557581	0.454701	0.5572	0.438071	0.54398	0.64377	0.61147	0.683957	0.732934	0.537354	0.629429	0.581519	0.718103	0.586873	0.767564
50.976	0.61376	0.485595	0.636387	0.57414	0.654147	0.600645	0.527495	0.377159	0.508476	0.444522	0.628566	0.583324	0.634944	0.573839	0.728536	0.447753	0.593408	0.574729	0.675116	0.525212	0.664854
51.316	0.498777	0.493371	0.534531	0.549577	0.642692	0.585902	0.598199	0.567399	0.677093	0.485897	0.709346	0.56949	0.610444	0.428948	0.542794	0.55704	0.575961	0.565073	0.765507	0.543392	0.703403
51.667	0.611165	0.454178	0.549863	0.492293	0.585142	0.592084	0.693644	0.458949	0.508451	0.445355	0.607603	0.746202	0.669146	0.538216	0.662695	0.53147	0.599887	0.58009	0.726747	0.576477	0.730454
52.016	0.651971	0.532609	0.694236	0.383306	0.609219	0.521932	0.529395	0.323177	0.442482	0.496168	0.664265	0.591812	0.685289	0.543041	0.584288	0.480918	0.619044	0.599408	0.728982	0.689503	0.616603
52.357	0.597479	0.452887	0.552758	0.43317	0.611248	0.499441	0.615495	0.471517	0.548318	0.555569	0.704893	0.552935	0.551606	0.598032	0.653901	0.510942	0.622038	0.600546	0.668272	0.505514	0.679899
52.691	0.583322	0.543986	0.609171	0.602419	0.609257	0.521683	0.67139	0.533626	0.652586	0.430441	0.790083	0.579807	0.515274	0.45845	0.731099	0.551887	0.600492	0.628549	0.687796	0.572967	0.588642
53.036	0.482933	0.440738	0.462319	0.654143	0.688965	0.654819	0.560282	0.402292	0.548446	0.553025	0.80697	0.643337	0.406097	0.409619	0.707034	0.534291	0.582109	0.600435	0.691254	0.489667	0.605563
53.378	0.442744	0.394087	0.494382	0.528051	0.61997	0.63782	0.682124	0.472513	0.571932	0.455503	0.681617	0.640732	0.712968	0.651042	0.698544	0.493426	0.549252	0.547878	0.658271	0.574536	0.618085
53.726	0.483653	0.480677	0.492899	0.463188	0.601056	0.506242	0.564728	0.546367	0.641946	0.499749	0.683061	0.622833	0.513583	0.528279	0.791147	0.551431	0.590708	0.553442	0.70773	0.618513	0.632278
54.217	0.542427	0.552435	0.552949	0.49954	0.556101	0.587177	0.593365	0.489019	0.523593	0.517732	0.784798	0.689853	0.428133	0.394849	0.585175	0.575617	0.56494	0.554476	0.718212	0.54827	0.604665
54.417	0.5296	0.405863	0.541988	0.539339	0.686074	0.559951	0.508686	0.485354	0.524233	0.438295	0.769361	0.678705	0.607156	0.523765	0.766982	0.566139	0.686452	0.596352	0.588038	0.492295	0.589785
54.757	0.491632	0.448498	0.561921	0.504776	0.573032	0.586014	0.502523	0.425049	0.5009	0.46393	0.741931	0.704186	0.617201	0.554793	0.629848	0.462457	0.545979	0.531105	0.726795	0.566706	0.708062
55.1	0.661851	0.573018	0.581107	0.490157	0.581918	0.539782	0.547697	0.529526	0.596926	0.50781	0.717703	0.694193	0.332805	0.498387	0.721593	0.571275	0.681354	0.644278	0.822425	0.529302	0.634097
55.439	0.500586	0.466154	0.542323	0.522061	0.526758	0.560081	0.630681	0.475348	0.547001	0.439416	0.669216	0.692263	0.633261	0.579443	0.691579	0.586609	0.671539	0.596571	0.638452	0.567029	0.650295
55.788	0.511847	0.373854	0.502667	0.485883	0.575557	0.572809	0.670907	0.496466	0.570748	0.440938	0.648874	0.630246	0.64658	0.458738	0.490656	0.477397	0.59862	0.668182	0.61944	0.584836	0.660819
56.125	0.572172	0.615198	0.630956	0.503347	0.661914	0.611141	0.715927	0.447951	0.68295	0.426246	0.60871	0.600661	0.461559	0.457169	0.643376	0.558669	0.671577	0.556971	0.670475	0.520917	0.718227
56.469	0.61363	0.614707	0.669524	0.485693	0.589277	0.509606	0.492879	0.418067	0.49437	0.48386	0.641137	0.615768	0.774849	0.543595	0.729533	0.646397	0.690412	0.656827	0.654384	0.553191	0.74323
56.808	0.565315	0.452446	0.632114	0.541592	0.62353	0.567883	0.720487	0.534481	0.63392	0.452864	0.641237	0.665633	0.577232	0.467211	0.634517	0.534098	0.641796	0.53589	0.807328	0.584939	0.751861
57.152	0.587733	0.412808	0.510296	0.493142	0.637443	0.583836	0.619438	0.456054	0.444407	0.527766	0.747691	0.673113	0.439519	0.540677	0.558148	0.512491	0.606092	0.587803	0.629913	0.473631	0.663548
57.494	0.596507	0.551664	0.64905	0.446185	0.556294	0.546673	0.664089	0.516721	0.583049	0.473024	0.759057	0.673558	0.466466	0.497797	0.589073	0.547879	0.619401	0.638922	0.677986	0.452353	0.624534
57.844	0.582492	0.473952	0.576248	0.433913	0.571939	0.591058	0.556317	0.450472	0.596077	0.496628	0.664919	0.657967	0.401654	0.621304	0.778921	0.561975	0.648359	0.631624	0.764944	0.503333	0.656551
58.186	0.653055	0.570649	0.581399	0.474448	0.607105	0.522956	0.625293	0.47665	0.495657	0.406061	0.639443	0.593264	0.603812	0.566589	0.739271	0.582848	0.66972	0.633183	0.708997	0.427264	0.590402
58.533	0.529678	0.482407	0.559805	0.663148	0.674701	0.641618	0.393258	0.325236	0.529643	0.479452	0.74499	0.665564	0.463288	0.508774	0.639269	0.58824	0.645487	0.623516	0.674641	0.559845	0.606855
58.873	0.524769	0.454482	0.518831	0.493775	0.61503	0.605596	0.543915	0.494863	0.659887	0.566558	0.720301	0.72304	0.642652	0.54294	0.799228	0.540765	0.613832	0.626078	0.641669	0.49332	0.638868
59.214	0.539178	0.576978	0.632483	0.537784	0.658364	0.647837	0.647867	0.466356	0.506743	0.475037	0.700424	0.721216	0.365832	0.533327	0.570115	0.612929	0.6727	0.625607	0.751277	0.600639	0.751938
59.573	0.509959	0.497115	0.602899	0.4394	0.596596	0.614288	0.67506	0.451231	0.451017	0.492785	0.851835	0.69262	0.617909	0.686557	0.629587	0.476492	0.580461	0.492986	0.63732	0.57111	0.615334
59.925	0.558957	0.517996	0.565105	0.5229	0.671492	0.551051	0.700835	0.440115	0.502482	0.506535	0.654443	0.752698	0.312377	0.391493	0.579365	0.534002	0.579486	0.618737	0.715581	0.514543	0.658289
60.254	0.520022	0.499434	0.587351	0.537914	0.67108	0.627206	0.593236	0.385089	0.444991	0.537647	0.817912	0.683354	0.345125	0.458242	0.572581	0.56635	0.612499	0.586295	0.715812	0.58462	0.682189
60.604	0.447797	0.426009	0.52306	0.487899	0.642759	0.610318	0.56951	0.480245	0.548719	0.544436	0.864149	0.739493	0.532022	0.433491	0.665914	0.547441	0.680427	0.566894	0.719801	0.542391	0.593041
60.945	0.645003	0.6212	0.66717	0.455766	0.579506	0.593516	0.655253	0.368631	0.491808	0.52644	0.646284	0.608377	0.734046	0.660193	0.764933	0.600941	0.643267	0.627289	0.776312	0.536723	0.721231
61.419	0.614741	0.554411	0.60205	0.514328	0.639877	0.548279	0.560707	0.395993	0.742838	0.504952	0.682701	0.673184	0.31874	0.425559	0.649112	0.586887	0.698944	0.6721	0.699137	0.547755	0.655705
61.647	0.44711	0.547009	0.615447	0.665682	0.648377	0.562904	0.661874	0.456487	0.554789	0.450447	0.70734	0.660674	0.374432	0.622847	0.557104	0.575205	0.62647	0.557206	0.758584	0.531133	0.794375
61.997	0.659386	0.560418	0.619039	0.522586	0.653438	0.596824	0.732466	0.453027	0.606582	0.423246	0.589575	0.666351	0.819106	0.671735	0.709018	0.547036	0.673144	0.671476	0.763974	0.579238	0.761306
62.338	0.555719	0.621479	0.601381	0.466452	0.637343	0.601077	0.730277	0.4919	0.707727	0.408172	0.826927	0.698553	0.476702	0.308283	0.645027	0.640735	0.661448	0.563166	0.66609	0.572305	0.726084
62.678	0.577381	0.554382	0.626082	0.557415	0.614634	0.637401	0.875537	0.587997	0.704813	0.484883	0.722014	0.676776	0.555264	0.435376	0.676439	0.537758	0.659179	0.607427	0.675452	0.456525	0.598838
63.039	0.497565	0.556452	0.599692	0.557446	0.64765	0.666822	0.612754	0.510547	0.547686	0.515411	0.694509	0.709205	0.502734	0.531006	0.79864	0.61489	0.653943	0.64063	0.669431	0.536371	0.725071
63.467	0.551567	0.575216	0.656921	0.445867	0.535802	0.572806	0.542835	0.417145	0.567082	0.542679	0.780373	0.697734	0.55651	0.45199	0.667717	0.600897	0.643224	0.605739	0.660469	0.603722	0.766825
63.796	0.550093	0.539005	0.556244	0.379455	0.619167	0.569257	0.581851	0.430921	0.641007	0.543567	0.837324	0.684561	0.563259	0.453418	0.604409	0.539694	0.64216	0.610114	0.626224	0.495293	0.653518
64.146	0.537665	0.44442	0.49803	0.553077	0.626598	0.583843	0.684526	0.521099	0.533153	0.399547	0.753093	0.558177	0.568898	0.562693	0.810482	0.620725	0.645885	0.606049	0.723884	0.58327	0.672924
64.489	0.50908	0.598541	0.627674	0.470707	0.634663	0.699851	0.507373	0.313362	0.476646	0.501768	0.831056	0.684221	0.548016	0.651795	0.60783	0.489461	0.619775	0.530614	0.697201	0.548279	0.705491
64.837	0.518227	0.507893	0.508138	0.528505	0.619108	0.594822	0.499043	0.37094	0.496575	0.420337	0.736048	0.648201	0.489509	0.327682	0.627939	0.551847	0.630918	0.618586	0.647374	0.604395	0.647793
65.198	0.486353	0.591279	0.525487	0.571979	0.662868	0.611463	0.628136	0.477886	0.490859	0.519761	0.816585	0.697519	0.508596	0.436886	0.558853	0.580727	0.650735	0.581047	0.709392	0.51227	0.706872
65.535	0.564429	0.502307	0.599304	0.594629	0.641019	0.600606	0.476643	0.346868	0.536919	0.465059	0.780212	0.724024	0.479648	0.48486	0.574007	0.585889	0.686568	0.72935	0.674677	0.576707	0.790858
65.874	0.622882	0.616879	0.697587	0.483646	0.662693	0.604883	0.684518	0.51216	0.73537	0.435809	0.669297	0.682051	0.354608	0.394176	0.526057	0.596458	0.644769	0.686687	0.810734	0.58009	0.741173
66.226	0.558396	0.521771	0.530494	0.489391	0.649915	0.624957	0.584941	0.429911	0.570698	0.516339	0.84826	0.732415	0.487811	0.413679	0.607811	0.608332	0.659544	0.625653	0.654713	0.514098	0.735605
66.566	0.501254	0.552613	0.548211	0.59475	0.766141	0.701266	0.515118	0.353503	0.459264	0.48302	0.767353	0.640242	0.382743	0.338355	0.549784	0.553041	0.714456	0.603564	0.753863	0.724996	0.737189
66.914	0.513212	0.521422	0.553617	0.454678	0.620192	0.550135	0.491874	0.334213	0.565554	0.512276	0.686652	0.744657	0.73934	0.535313	0.620121	0.636515	0.716816	0.695689	0.664684	0.6127	0.710488
67.266	0.647884	0.515878	0.585656	0.481902	0.587399	0.585353	0.597796	0.522013	0.532268	0.473949	0.656856	0.633097	0.492006	0.489663	0.629915	0.618417	0.605584	0.605987	0.765435	0.748384	0.857456
67.605	0.606908	0.628458	0.614126	0.475015	0.712502	0.646259	0.680236	0.429382	0.462525	0.463583	0.616806	0.641132	0.673585	0.517202	0.74376	0.618869	0.648849	0.562918	0.690662	0.631253	0.763
67.956	0.639629	0.557176	0.618407	0.588633	0.647484	0.619808	0.744914	0.463671	0.483786	0.481021	0.757642	0.679408	0.804054	0.741084	0.691622	0.595069	0.589367	0.630346	0.748339	0.655193	0.697818
68.295	0.646765	0.552537	0.646496	0.451195	0.699184	0.626188	0.692656	0.408108	0.544629	0.478212	0.682331	0.691523	0.282814	0.36638	0.496991	0.549192	0.643142	0.601906	0.652365	0.669448	0.69214
68.645	0.617259	0.50541	0.659148	0.479166	0.630392	0.529554	0.785744	0.474264	0.554706	0.497683	0.783032	0.76477	0.742065	0.451189	0.576829	0.630481	0.68956	0.641137	0.663951	0.572108	0.794276
68.976	0.559029	0.568891	0.570083	0.574914	0.730085	0.652915	0.615089	0.564477	0.700468	0.501925	0.796195	0.604321	0.423192	0.447039	0.658402	0.506259	0.64548	0.559056	0.624562	0.531999	0.643453
69.325	0.546535	0.5688	0.505492	0.541065	0.758864	0.706641	0.510703	0.453759	0.610451	0.508297	0.642879	0.651637	0.550583	0.559325	0.63937	0.542117	0.668124	0.605793	0.65524	0.569271	0.768703
69.786	0.57963	0.643543	0.520167	0.41266	0.592216	0.578283	0.533878	0.331582	0.485045	0.451705	0.643002	0.636205	0.485602	0.579275	0.700621	0.584044	0.661847	0.677826	0.615696	0.595172	0.758024
70.005	0.667533	0.621643	0.676845	0.493924	0.662007	0.694298	0.641983	0.523815	0.597145	0.445801	0.686696	0.569329	0.377123	0.560816	0.656758	0.667181	0.644952	0.717836	0.674772	0.515492	0.688111

## Sheet: 4E
Mobile fraction
robo2 +/+	robo2 -/-
0.93	0.58
0.63	0.54
0.52	0.58
0.76	0.51
0.62	0.69
0.69	0.66
0.52	0.66
0.49	0.46
0.65	0.58
0.63	0.49
0.73	0.78
0.74	0.67
0.6	0.52
0.73	0.52
0.96	0.67
0.75	0.58
0.71	0.64
0.72	0.61
0.45	0.7
0.67	0.56
0.66	0.71
0.674286	0.605238
0.12331	0.0816858
S pooled 1	0.102498			Cohen's D1:	0.673648
S pooled 2	0.10459			Cohen's D2:	0.660176
S pooled 3	0.10459			Cohen's D3:	0.660176

## Sheet: 4F
Stable fraction
robo2 +/+	robo2 -/-
0.07	0.42
0.37	0.46
0.48	0.42
0.24	0.49
0.38	0.31
0.31	0.34
0.48	0.34
0.51	0.54
0.35	0.42
0.37	0.51
0.27	0.22
0.26	0.33
0.4	0.48
0.27	0.48
0.04	0.33
0.25	0.42
0.29	0.36
0.28	0.39
0.55	0.3
0.33	0.44
0.34	0.29
0.325714	0.394762
0.12331	0.0816858
S pooled 1	0.102498			Cohen's D1:	0.673648
S pooled 2	0.10459			Cohen's D2:	0.660176
S pooled 3	0.10459			Cohen's D3:	0.660176
