# Supplementary material for: Robo2 regulates synaptic oxytocin content by affecting actin dynamics
Source: eLife. 2019 Jun 10;8:e45650. doi: 10.7554/eLife.45650 (PMC6590984; doi:10.7554/eLife.45650)
Supplement: Figure 5—source data 1. — The excel sheet includes values for number and volume of neurohypophyseal synapses and OXT puncta from confocal imaging of larval neurohypophysis of multiple experiments namely: 1) robo2 +/+ vs robo2 -/- 2) Mock vs morpholino-injected embryos 3) Mosaic transgenesis experiments by hypophyseal expression of tRFP vs slit3. [file elife-45650-fig5-data1.xlsx]

## Sheet: 5A
Neurohypophyseal synapse count
robo2 +/+	robo2 -/-
426	312
286	365
313	398
409	319
278	336
373	226
327	355
314	337
229	197
243	254
360	238
362	224
344	298
	273
	288
	361
	322
328	300.176
57.0681	55.7971
S pooled 1	56.4326			Cohen's D1:	0.49304
S pooled 2	56.4362			Cohen's D2:	0.493008
S pooled 3	56.3454			Cohen's D3:	0.493803

## Sheet: 5B
Neurohypohyseal synapse volume (mm3)
robo2 +/+	robo2 -/-
1.2532	1.18715
1.14711	1.19081
1.11936	1.18448
1.19248	1.41017
1.69325	1.24886
1.20648	1.42812
1.44982	1.06736
1.34943	1.1463
1.38946	1.50208
1.38445	1.20267
1.25717	1.34282
1.18516	1.27026
1.17789	1.15137
	1.43916
	1.21403
	1.28092
	1.19354
1.29271	1.26236
0.152521	0.117923
S pooled 1	0.135222			Cohen's D1:	0.224471
S pooled 2	0.136324			Cohen's D2:	0.222656
S pooled 3	0.13385			Cohen's D3:	0.226771

## Sheet: 5C
Neurohypophyseal synapse positive OXT puncta count
robo2 +/+	robo2 -/-
278	210
269	406
291	430
236	183
142	260
186	80
205	307
174	56
240	30
260	62
353	125
307	212
295	414
	308
	298
	322
	260
248.923	233.118
57.2786	125.212
S pooled 1	91.2452			Cohen's D1:	0.173219
S pooled 2	97.3623			Cohen's D2:	0.162336
S pooled 3	101.808			Cohen's D3:	0.155247

## Sheet: 5D
Neurohypophyseal synapse positive OXT puncta volume (mm3)
robo2 +/+	robo2 -/-
1.3195	1.14704
1.10706	0.989619
1.04775	0.991959
0.964184	1.05848
0.673182	1.04727
0.735845	0.852885
1.0048	0.831019
1.13602	0.849175
1.24093	0.451144
1.0361	0.543174
1.22811	0.774212
1.13783	0.829384
1.24192	1.08174
	0.95178
	0.995139
	1.18342
	0.957502
1.06717	0.91382
0.184489	0.189214
S pooled 1	0.186852			Cohen's D1:	0.820715
S pooled 2	0.186866			Cohen's D2:	0.820649
S pooled 3	0.187204			Cohen's D3:	0.819171

## Sheet: 5E
Number of neurohypophyseal projecting axons
robo2 +/+	robo2 -/-
13	8
7	9
9	12
10	9
7	8
9	5
8	8
8	9
11	7
11	9
7	5
12	10
10	7
	10
	9
	10
	9
9.38462	8.47059
1.90297	1.71902
S pooled 1	1.81099			Cohen's D1:	0.50471
S pooled 2	1.81333			Cohen's D2:	0.50406
S pooled 3	1.80016			Cohen's D3:	0.507748

## Sheet: 5F
Neurohypophyseal synapse count
Mock	slit3 MO
251	351
352	228
323	194
308	301
259	262
366	275
190	201
359	310
308	304
389	316
309	186
207	350
271	212
229	264
198
287.933	268.143
62.2537	54.5054
S pooled 1	58.3796			Cohen's D1:	0.338997
S pooled 2	58.508			Cohen's D2:	0.338253
S pooled 3	58.651			Cohen's D3:	0.337428

## Sheet: 5G
Neurohypohyseal synapse volume (mm3)
Mock	slit3 MO
1.00442	0.991406
0.982002	0.963981
0.900777	0.917064
1.13535	0.820093
1.01576	0.946697
0.937917	0.972832
0.932768	0.999044
1.2385	0.974067
0.9355	1.02628
0.933094	1.10687
0.973905	0.952639
1.10607	0.982127
0.937553	0.965466
1.0458	0.966435
1.2916
1.02473	0.970358
0.114435	0.059499
S pooled 1	0.0869672			Cohen's D1:	0.625245
S pooled 2	0.0912019			Cohen's D2:	0.596214
S pooled 3	0.0921669			Cohen's D3:	0.589971

## Sheet: 5H
Neurohypophyseal synapse positive OXT puncta count
Mock	slit3 MO
284	340
411	222
311	206
313	354
268	262
366	212
249	216
363	217
267	373
351	400
375	184
203	321
200	131
210	299
195
291.067	266.929
69.026	77.94
S pooled 1	73.483			Cohen's D1:	0.328485
S pooled 2	73.618			Cohen's D2:	0.327883
S pooled 3	73.4531			Cohen's D3:	0.328619

## Sheet: 5I
Neurohypophyseal synapse positive OXT puncta volume (mm3)
Mock	slit3 MO
0.853585	0.986133
0.85211	0.702935
0.81083	0.828776
1.07592	0.730236
1.0297	0.746114
0.802422	0.613831
0.941502	0.928322
1.21725	0.73047
0.99573	0.889079
0.928535	0.9014
0.798785	0.783175
0.868582	0.737027
0.875848	0.772018
0.988219	0.878341
0.93185
0.931391	0.80199
0.111913	0.0992674
S pooled 1	0.10559			Cohen's D1:	1.2255
S pooled 2	0.105779			Cohen's D2:	1.22331
S pooled 3	0.106013			Cohen's D3:	1.22062

## Sheet: 5J
Number of neurohypophyseal projecting axons
Mock	slit3 MO
11	9
13	10
11	13
9	16
10	12
14	11
10	10
12	18
9	14
9	9
11	10
14	14
13	7
15	14
7
11.2	11.9286
2.19697	2.93901
S pooled 1	2.56799			Cohen's D1:	0.283713
S pooled 2	2.59465			Cohen's D2:	0.280798
S pooled 3	2.58101			Cohen's D3:	0.282281

[truncated: 2 more sheets: 5O, 5R]
