# Supplementary material for: Robo2 regulates synaptic oxytocin content by affecting actin dynamics
Source: eLife. 2019 Jun 10;8:e45650. doi: 10.7554/eLife.45650 (PMC6590984; doi:10.7554/eLife.45650)
Supplement: Figure 6—source data 1. — The excel sheet includes values for FRAP data of neurohypophyseal synaptic OXT-EGFP in robo2 +/+ vs robo2 -/- larvae. The full-scale normalized values generated from Easy-Frap software are shown. [file elife-45650-fig6-data1.xlsx]

## Sheet: 6I_WT
time	4a.txt	4b.txt	4c.txt	6a.txt	6b.txt	6d.txt	7a.txt	7b.txt	7c.txt	10a.txt	10b.txt	10c.txt	12a.txt	12b.txt	12c.txt	14a.txt	14b.txt	14c.txt	15a.txt	15b.txt	16a.txt	16b.txt	17b.txt	17c.txt
0	0	0	0	0	0	0	0	0	0	0	0	0	0	0	0	0	0	0	0	0	0	0	0	0
1.022	-0.00396255	0.0214549	-0.00918005	0.0294337	-0.00121642	0.013011	0.0195765	0.0103713	0.0186694	-0.0120694	0.00697931	0.0144228	-0.00654869	0.0100786	-0.00347357	-0.0086983	0.0156212	0.00406298	0.027723	0.0177314	0.0390588	0.0394917	-0.0276268	0.0130945
2.036	0.008601	0.0493401	-0.0110441	-0.0149613	0.00875653	0.0130051	0.0284419	0.00538875	0.018026	-0.0349477	0.0175664	0.0106039	0.00433594	0.0302545	0.00175006	-0.000216863	0.0131752	-0.000293712	0.037974	-0.00058153	0.0173669	0.00782689	-0.0452201	-0.0221701
3.053	0.0193452	0.0102984	0.000189085	-0.00286893	-0.00514814	-0.000496789	0.010035	0.00044762	0.0246695	-0.0147343	-0.0126076	0.0141544	-0.021075	0.0220656	0.0157365	-0.00726864	0.0288217	0.0141077	0.0150759	0.0274298	0.028084	0.0634316	0.0114197	0.0418323
4.053	0.00344257	0.0335954	-0.00934502	0.01355	0.00220778	0.00106717	0.0432961	0.0103038	0.016247	-0.00837087	0.0107806	0.0319084	-0.00253516	0.022943	0.0074352	-0.0296275	0.042875	-0.00600291	-0.00564826	0.0239455	0.0164911	0.00894929	-0.0045968	-0.028998
5.082	0.0292387	0.0413797	-0.00657997	0.0520114	0.00248094	0.0118617	0.0381723	0.0191387	0.0424381	-0.0316151	0.0266583	0.0217364	-0.00606876	0.041076	0.00704817	-0.0247209	0.0490158	0.0132754	0.00768382	0.0187629	0.00547272	0.0454454	-0.0816485	-0.0097477
6.099	0.00688232	0.0550533	0.00986041	0.0287885	0.0143106	0.0187914	0.0261658	0.0251445	0.0358957	0.0242481	0.0105045	0.0460914	-0.0058682	0.0410038	0.0100807	0.0196034	-0.00461135	0.00361884	0.0525723	0.0270658	0.0213514	0.00607085	-0.00605186	0.0218538
7.116	0.0120471	0.0657531	-0.00408861	-0.0195755	0.0161336	0.00984969	0.0366064	0.0112607	0.0229015	-0.0196093	-0.0030656	0.00840584	0.000697737	0.0258402	0.0109257	0.0201057	0.0205174	-0.0114324	0.0245498	0.0144795	0.0159643	0.0237887	-0.0443281	0.0916169
8.135	0.00856935	0.0624648	0.00238509	0.000646357	0.0134952	0.00386346	0.0433347	0.00840216	0.0347326	0.0154265	0.018735	0.0300919	-0.00575789	0.0262777	0.016921	0.0247059	0.0242257	0.0265114	0.0498997	0.0192956	0.0339432	0.0362892	-0.0171485	-0.0415831
9.142	0.0171837	0.0663747	0.01052	0.0373031	0.0134823	0.00907626	0.0257552	0.000791217	0.0189604	-0.00558604	0.0366951	0.0176132	-0.00294471	0.0159054	0.0133895	0.0161625	0.0214509	0.00696719	-0.00442806	0.0183978	0.0326705	-0.00101699	-0.0150244	-0.0513437
10.161	0.0210143	0.0575626	0.00112465	0.0354331	0.0169655	0.0115644	0.0152181	0.0205084	0.0131556	-0.0220638	0.0450043	0.0476389	-0.00145449	0.0376594	0.0128452	-0.0121287	0.0233799	0.0240379	0.04809	0.00566263	0.0308642	0.0514699	-0.00824814	0.0748075
11.192	0.0378901	0.0748534	0.0305417	0.0146604	0.0112322	0.0121771	0.0554245	0.0181423	0.0465617	0.00090076	0.0186564	0.014122	0.00890717	0.031254	0.0190688	0.0584759	0.0154993	-0.00812081	0.0500171	0.00888567	0.00725659	0.0740541	-0.0199647	0.0495845
12.22	0.0276299	0.0554204	0.00308225	0.0281903	0.0131045	0.00953028	0.0593331	0.0374346	0.0375057	-0.0496197	0.0348492	0.0277237	0.000413306	0.0452036	0.0323359	0.024768	0.00887864	0.0118846	0.0340679	0.0221498	0.016104	0.0455786	0.0267625	-0.0504907
13.221	0.0285631	0.0814742	-0.0038423	0.0429234	0.0326618	0.000109385	0.0658172	0.0271563	0.0290737	0.0317593	0.0345769	0.0280743	0.00484629	0.029331	0.0156726	0.0210635	0.034941	0.0124064	0.0460737	0.0391309	0.0348901	0.0255011	0.0118561	0.0268164
14.232	0.0536384	0.104655	-0.00211752	0.0253241	0.0204903	0.00772844	0.065801	0.00964549	0.0495937	0.0373114	0.0459851	0.0245975	0.00655336	0.0354489	0.0251961	0.0330063	0.0306232	0.0163487	0.0623595	0.0497216	0.00559358	0.08232	-0.00895443	-0.0231951
15.265	0.0451129	0.0761513	0.0142333	0.0656565	0.0101472	-0.00384934	0.100476	0.0131913	0.0519109	0.033406	0.0385508	0.0354331	0.0090784	0.0477682	0.0370801	0.0482709	0.0165962	0.00844874	0.062795	0.0293552	0.0215429	0.0319242	-0.0898766	-0.0640429
16.28	0.0350648	0.0829988	0.0410616	0.0903767	0.00648631	-0.00230224	0.0451485	0.0499159	0.0235393	0.0238524	0.0363048	0.0407152	0.00621198	0.0248363	0.0240727	-0.0123442	0.0315577	0.0117022	0.0855786	0.0392556	0.0366236	0.0592246	0.00524954	0.0875477
17.291	0.0440046	0.0929845	0.00454867	0.0709756	0.0421612	0.019735	0.0502419	0.0349546	0.0548041	0.0361784	0.0375827	0.0307056	0.00627078	0.0379028	0.036453	0.0425218	0.0514303	0.0335231	0.0729784	0.0364855	0.0674301	-0.0166226	-0.0896491	0.0300606
18.305	0.0622498	0.105773	0.0267843	0.0228863	0.0484784	0.0104906	0.0449599	0.0153999	0.0314177	0.0143046	0.0502001	0.0754352	0.00204111	0.0504824	0.0334293	0.0231456	0.0448569	0.0160107	0.0113369	0.0501557	0.0441544	0.0336993	-0.0271235	0.0193304
19.333	0.049867	0.109101	0.0411062	0.0426801	0.04437	0.024706	0.0836915	0.018043	0.0528128	0.103237	0.0568552	0.064875	0.00366368	0.0332291	0.0504937	0.0587496	0.0419265	0.00915851	0.042189	0.0344971	0.0425702	0.0489146	-0.0205155	0.0553159
20.961	0.0522747	0.0694036	0.0422175	0.0929471	0.0388036	0.0296514	0.0866004	0.0159759	0.0639659	0.0355714	0.0428621	0.0647969	0.00911491	0.0337831	0.0293523	0.0410231	0.0275519	0.0235462	0.0539935	0.0404745	0.0219061	0.0363324	-0.00613224	0.038025
21.964	0.0561633	0.0973257	0.0324598	0.0584135	0.0290674	0.00301263	0.0721436	0.0311098	0.0634352	0.0588728	0.063023	0.0558429	0.0038967	0.0377795	0.0271055	0.0243538	0.0293196	0.0333407	0.046493	0.0552843	0.014175	0.0924056	-0.0301215	-0.012286
22.993	0.0419532	0.0938098	0.00554586	0.0611689	0.0339033	0.0213364	0.0635849	0.0335006	0.0620376	0.0457351	0.0249359	0.0326336	0.00162567	0.0488027	0.0337682	0.0638534	0.0277247	0.0241319	0.0656498	0.0408584	0.0610105	0.093226	0.0292958	0.0859116
24.004	0.0661266	0.0941377	0.0154556	0.0037343	0.0396415	0.013902	0.0658054	0.0124364	0.0495836	0.0178953	0.0505385	0.0603269	0.0135427	0.0479491	0.0586173	0.0845362	0.0281473	0.00869913	0.0533094	0.049644	0.0308493	0.0724887	-0.00833934	0.063663
25.032	0.0504053	0.108605	0.0287901	0.0743349	0.0384805	0.0170149	0.0907751	0.0165706	0.0748296	0.0292694	0.0700592	0.061841	0.0137417	0.0516708	0.0357256	0.0378264	0.0380167	0.015126	0.0709426	0.0431249	0.0572452	0.117036	0.00904472	0.00411373
26.033	0.0551113	0.0816639	0.0399894	0.0609794	0.0365405	0.010081	0.0904761	0.0299624	0.0478779	0.0565058	0.0441137	0.0710654	0.00930765	0.0351304	0.0285663	0.0763159	0.0447732	0.0140033	0.0612207	0.056994	0.0689264	0.0989201	-0.0276781	-0.000218009
27.066	0.0383129	0.103767	0.030209	0.0303154	0.0471354	-0.00527097	0.0935787	0.0322096	0.0628419	0.0166787	0.0376752	0.0604072	0.0152568	0.0450187	0.0371218	-0.0102258	0.0399484	0.0287967	0.0579561	0.0411847	0.059473	0.0778494	-0.0406367	0.0149123
28.072	0.060543	0.116952	-0.00541002	0.0418269	0.0450659	0.0107609	0.0879792	0.0343363	0.0601822	0.016178	0.0422267	0.0765934	0.024595	0.0369348	0.0460704	0.0141605	0.0468869	0.0351149	0.0486006	0.0424859	0.0859389	0.0618352	0.0412772	0.0701703
29.102	0.0693331	0.0908463	0.00372221	0.0806305	0.0657274	0.0071567	0.0798285	0.0489239	0.0393834	0.0207643	0.0381042	0.0619165	0.0110364	0.0502298	0.0492567	0.00277169	0.0472685	0.0423379	0.07774	0.0433247	0.0766926	0.0637638	0.0209881	0.0241793
30.125	0.0431447	0.122466	0.0321369	0.0194406	0.0522468	0.0332997	0.0962088	0.0551034	0.059822	0.0372155	0.0402425	0.0304674	0.0190301	0.0522789	0.0446899	0.0641407	0.0507422	0.0272463	0.0702065	0.0621876	0.0720617	0.0725708	-0.0040377	0.0960177
31.139	0.0569436	0.105494	0.000465534	0.0781398	0.0429594	0.0196002	0.0850542	0.0301943	0.0876651	0.0236407	0.0570472	0.0691057	0.0195944	0.0458407	0.0438454	0.0386597	0.0508374	0.035743	0.0681462	0.028687	0.0780235	0.0746026	-0.0583595	0.0452607
32.148	0.0674571	0.124906	0.0180277	0.0764965	0.0400481	0.0138317	0.0669193	0.0218185	0.0682652	-0.0210713	0.0862665	0.0615707	0.0244414	0.05199	0.0469021	0.0308808	0.0372382	0.0172806	0.050986	0.0525544	0.0811742	0.11697	0.0177009	0.0518093
33.182	0.0608783	0.101337	0.00553575	0.0543303	0.041715	0.0175072	0.062442	0.0268354	0.0695334	0.0551583	0.0550427	0.0537844	0.0198602	0.0435773	0.0425814	0.0347977	0.0445388	0.0567793	0.0665048	0.0375566	0.0591893	0.120323	0.0374753	0.0473365
34.179	0.0684116	0.0993472	0.0134733	0.0878293	0.0382697	0.0122188	0.0921735	0.0437101	0.11065	0.0239944	0.0984525	0.073643	0.00589676	0.037037	0.050662	0.0498367	0.0486547	0.0338524	0.0793816	0.0485452	0.0747073	0.0745445	0.0241141	-0.0259027
35.199	0.0405303	0.113331	0.0233299	0.10458	0.0409808	0.00566167	0.0850119	0.0406283	0.103258	0.0515165	0.0896305	0.0520898	0.0229924	0.044973	0.0516861	0.0455371	0.0400864	0.0616096	0.0735232	0.0466072	0.0534034	0.0561157	0.0165486	0.0929725
36.218	0.051382	0.110293	0.0369612	0.0570061	0.0451656	0.0218425	0.107992	0.0183291	0.0754738	0.082841	0.0748936	0.0348404	0.0298415	0.0692647	0.0655348	0.0310841	0.0350607	0.0631718	0.0812182	0.0508454	0.0917298	0.0757285	-0.00867228	0.0338569
37.241	0.0508105	0.0992812	0.0258971	0.0440453	0.0252889	0.0118792	0.100097	0.0421911	0.0843864	0.0381494	0.090766	0.084656	0.0345682	0.0559563	0.0337273	0.101772	0.0462894	0.0740913	0.0823435	0.0530085	0.104874	0.0772325	0.027747	0.0241063
38.27	0.0591163	0.133243	0.0292926	0.0259907	0.0242748	0.024535	0.0531092	0.0377437	0.0820075	0.0326397	0.0836588	0.0664402	0.0231257	0.0522482	0.0473423	0.02765	0.0401981	0.0495713	0.075298	0.0497812	0.077158	0.0996936	0.0371424	0.0857606
39.29	0.0505934	0.12515	0.0209701	0.0528301	0.0507179	0.0101492	0.0674747	0.0349876	0.0805398	0.0103392	0.0453971	0.0878823	0.0310121	0.0400684	0.041132	0.0293971	0.0524092	0.0424273	0.109327	0.0562735	0.0600249	0.0801974	0.0897118	0.0524513
40.3	0.0603993	0.170223	0.0474589	0.0381366	0.0483213	0.0105493	0.0638934	0.0334445	0.0597687	-0.00496428	0.0386064	0.0708391	0.0262737	0.0371767	0.047557	0.0786716	0.0572515	0.040556	0.0707207	0.0533203	0.0442598	0.0813032	0.0142951	0.0957882
41.329	0.074496	0.142154	0.0638399	0.0176158	0.0714705	0.00491661	0.0929152	0.0427059	0.0761659	0.0239763	0.0523496	0.0510932	0.0159879	0.0434994	0.0529017	0.0348721	0.0556531	0.0465945	0.0700399	0.0472879	0.0353029	0.0829622	0.00510787	0.0286211
42.346	0.0819519	0.120869	0.0321275	0.0658042	0.0437661	0.0233323	0.080726	0.0443316	0.0896291	0.00917113	0.0760687	0.0711793	0.015288	0.0575772	0.0420889	0.083281	0.0450925	0.039583	0.0815177	0.061373	0.105124	0.0925097	0.0268558	0.104408
43.357	0.0517315	0.102015	0.0217866	0.0515835	0.0495311	0.0115166	0.0625528	0.0591051	0.0573439	0.0872208	0.0450327	0.0608282	0.0206613	0.0389198	0.0592456	0.0806479	0.061962	0.059131	0.0540759	0.0503726	0.0823501	0.108516	0.0691842	0.0289633
44.366	0.0660173	0.115845	0.02876	0.0802241	0.0407889	0.0158769	0.082754	0.0232816	0.0856025	0.0395512	0.0555358	0.0559183	0.0334842	0.0414056	0.0570006	0.0428529	0.0827249	0.0441503	0.0839107	0.057541	0.0843166	0.0404371	0.0884616	0.114956
45.396	0.0765556	0.0871274	0.0368728	0.0555356	0.061679	0.00956904	0.0771028	0.0525012	0.090592	0.0633134	0.0734359	0.0784891	0.0506762	0.0439519	0.0593281	0.12282	0.0676031	0.0722333	0.109503	0.0534273	0.0235942	0.0552893	0.0582475	-0.0425289
46.416	0.0633664	0.144745	0.034498	0.110571	0.0558652	0.0206726	0.0431465	0.0395684	0.06765	0.116175	0.0703684	0.0580369	0.0370562	0.0489773	0.0440899	0.0900432	0.0681219	0.0415767	0.0713641	0.0568629	0.0708574	0.0601725	0.0779257	0.144406
47.436	0.0752032	0.121918	0.0219319	0.0464387	0.0228472	0.0149119	0.0731933	0.0777892	0.077529	0.00142355	0.0475129	0.0523367	0.0302906	0.0396091	0.0573208	0.0542228	0.0758918	0.0568434	0.0598901	0.0578664	0.00921363	0.0711357	0.0914453	0.0489882
48.445	0.0657789	0.133604	0.025636	0.0373887	0.0437024	0.00371943	0.105496	0.0456819	0.0620427	0.0733625	0.0579737	0.104515	0.030522	0.0465219	0.050138	0.103662	0.0593222	0.0493161	0.0641496	0.0622682	0.0407541	0.0772334	0.0353116	0.054603
49.484	0.0706502	0.147871	0.0257321	0.14384	0.0515373	0.00804441	0.0850882	0.0500689	0.0625538	0.0396088	0.0557257	0.0351615	0.0507023	0.0591035	0.0577375	0.0720562	0.06222	0.0235681	0.112258	0.0390046	0.0635679	0.0758551	0.0322782	-0.0179204
50.485	0.0934073	0.116487	0.00722688	0.0759397	0.0231031	0.0138366	0.0817973	0.06738	0.0873044	0.0428886	0.0841023	0.0713786	0.0303449	0.0495387	0.0485103	0.0500287	0.046852	0.0387536	0.101063	0.0580222	0.139597	0.0690104	0.0214794	-0.00740824
51.495	0.0788031	0.127497	0.0321116	0.046366	0.0525297	0.0134726	0.0862553	0.0795559	0.0555746	0.0494492	0.0482918	0.0584392	0.0426726	0.0426879	0.0760165	0.0505307	0.0626724	0.0557085	0.0740443	0.0435962	0.0816687	0.0952621	0.0850817	0.0840334
52.518	0.0957941	0.142719	0.0429958	0.0404401	0.0831859	0.025117	0.0522341	0.0697717	0.0621454	0.0276376	0.0535695	0.0898031	0.0458014	0.0662397	0.0560707	0.101855	0.091211	0.0481772	0.105676	0.0442354	0.0887151	0.0913199	0.0433583	0.00972315
53.526	0.0750249	0.177614	0.0298343	0.0646252	0.0807768	0.0242	0.0692257	0.0470812	0.0820756	0.0937509	0.0875033	0.0755805	0.0479032	0.0501065	0.0617189	0.100352	0.0679575	0.0493303	0.0912895	0.047424	0.120695	0.073778	0.0178275	-0.0351388
54.546	0.100632	0.148408	0.0155916	0.0660952	0.0820947	0.0192475	0.0972591	0.0660289	0.090975	0.0516317	0.068367	0.0962196	0.0457514	0.0544547	0.0555086	0.036015	0.0888392	0.0448509	0.0809983	0.0396171	0.0921193	0.0926337	0.0497048	0.00818966
55.555	0.0706566	0.153934	0.0184918	0.0724511	0.067307	0.0214478	0.076015	0.0591708	0.0757008	0.0464093	0.0689885	0.0876995	0.047658	0.062169	0.0632809	0.0706083	0.0803327	0.0595493	0.117375	0.0508371	0.109459	0.0773242	0.00889863	-0.00274618
56.566	0.0848109	0.174606	0.0561981	0.143327	0.0599395	0.028536	0.100921	0.0538217	0.0859773	0.0234423	0.0716371	0.060164	0.0453153	0.0481374	0.0507765	0.0412815	0.0673752	0.0795527	0.114548	0.0586733	0.0877199	0.0752185	0.107386	0.0119125
57.586	0.062829	0.138478	0.0575759	0.0365336	0.0684152	0.0260199	0.107184	0.0790678	0.0853385	0.0748686	0.0561931	0.0799657	0.0527258	0.0399768	0.0454812	0.0586661	0.0686233	0.0578541	0.102902	0.0643581	0.0721261	0.0549973	0.0814796	0.0230858
58.595	0.0886986	0.141136	0.0571902	0.115757	0.0919322	0.0166864	0.102526	0.0681935	0.0923502	0.0390968	0.0618456	0.0997772	0.0541547	0.0416218	0.0547529	0.0860416	0.0657416	0.0740412	0.102424	0.0480736	0.0754803	0.0524567	0.0832876	0.0829384
59.615	0.0907347	0.14322	0.067371	0.0995377	0.0961054	0.0168931	0.122237	0.0667626	0.0987757	0.0434262	0.0919724	0.0793542	0.0578632	0.069012	0.0659887	0.0968262	0.0739081	0.0290367	0.107396	0.0479521	0.0807235	0.0693821	0.0267416	0.0013652
60.625	0.0907668	0.162544	0.0544702	0.0838834	0.0689915	0.0188477	0.102863	0.0802328	0.0929025	0.0931647	0.0995139	0.0938961	0.0735762	0.0446139	0.0621127	0.0218795	0.0613639	0.0586318	0.0852399	0.0612583	0.0235137	0.094477	0.101466	0.0268607
61.645	0.0657028	0.144165	0.0136745	0.0425871	0.0746784	0.0317456	0.104914	0.0673499	0.0975882	0.0128972	0.0786626	0.0770001	0.0594505	0.0534817	0.0501485	0.0703652	0.0643184	0.0448944	0.112645	0.0649755	0.0955721	0.060501	0.0643408	0.0338901
62.651	0.0758761	0.140787	0.0671088	0.0734356	0.0479712	0.0183483	0.0554816	0.0558227	0.0870111	0.0496841	0.0928907	0.117022	0.0579928	0.0592583	0.0568296	0.0674417	0.0656116	0.0423872	0.11725	0.0555398	0.0686369	0.0423176	0.0423767	0.190146
63.682	0.0849465	0.153217	0.0351495	0.0901216	0.0657248	0.0180506	0.102145	0.0968189	0.0874363	0.0687425	0.0834082	0.104939	0.0484564	0.0503369	0.0673087	0.0378748	0.0801981	0.0471471	0.0752412	0.0581006	0.109653	0.113625	0.0845466	0.051866
64.701	0.0711017	0.165655	0.0359546	0.0881349	0.0508544	0.00147984	0.083948	0.0669925	0.0988182	0.0229918	0.0904564	0.0692495	0.056957	0.0555643	0.0805311	0.0864288	0.0757682	0.0613056	0.132897	0.06086	0.110517	0.0988685	0.0409256	0.0513008
65.711	0.0608898	0.129883	0.0793609	0.0587649	0.0836867	0.0159485	0.111796	0.060768	0.115014	0.0839448	0.0753304	0.0868555	0.0671735	0.0389871	0.061577	0.0842603	0.0533599	0.0455804	0.0952217	0.0522991	0.0565386	0.0711888	0.0274099	0.0478608
66.731	0.0659042	0.154246	0.0387017	0.0426342	0.0656233	0.0360626	0.0863682	0.0906133	0.107656	0.0586019	0.0696961	0.0785423	0.0656759	0.0483233	0.0559236	0.066841	0.0546024	0.0534771	0.111689	0.0431658	0.0927045	0.00774123	0.0911008	0.0950279
67.75	0.0636329	0.15037	0.0195831	0.140327	0.0578302	0.0171839	0.104645	0.0643189	0.114774	0.000335152	0.0757274	0.0633139	0.0531087	0.0547177	0.0493367	0.0988554	0.0846805	0.0557593	0.0841204	0.0566178	0.0922448	0.0740683	0.0373392	0.0974889
68.761	0.0762149	0.170654	0.034555	0.103104	0.0376606	0.0313082	0.108646	0.0532303	0.0991872	0.0409723	0.0556574	0.0771032	0.0605753	0.0632058	0.0614511	0.061787	0.0693052	0.0422192	0.0852337	0.0452275	0.0986427	0.109809	0.0936126	-0.0291605
69.77	0.0748016	0.154001	0.0589322	0.123076	0.0610595	0.0334256	0.097759	0.0620918	0.100924	0.0569102	0.0873212	0.0923783	0.0353404	0.0572398	0.057488	0.0176723	0.0958612	0.0534535	0.113352	0.0618212	0.123707	0.0981036	0.0196199	0.0678048
70.781	0.0815018	0.146393	0.071774	0.102853	0.0629799	0.034584	0.0993672	0.0609398	0.100306	0.0593033	0.0598267	0.0943248	0.0400036	0.0433745	0.0642436	0.0700638	0.0700692	0.046797	0.0807348	0.0612349	0.083839	0.0873242	0.0859757	0.059841
71.801	0.0588051	0.150947	0.0639178	0.0648646	0.0410887	0.0297191	0.116799	0.0686441	0.0773139	0.0744633	0.0733785	0.0954091	0.0512061	0.0496871	0.0737533	0.0975875	0.0835108	0.0607752	0.0978822	0.0602622	0.105474	0.0414555	0.0773324	0.0540014
72.81	0.0727245	0.171391	0.0318295	0.0972975	0.0559846	0.0282502	0.105927	0.0677507	0.063434	0.0979577	0.120264	0.0843283	0.0848328	0.0445634	0.0649828	0.078187	0.0657502	0.0467563	0.0754443	0.0745308	0.0887556	0.0611858	0.0556264	0.0984836
73.83	0.0843489	0.136935	0.0373637	0.0782419	0.116921	0.0218509	0.0765838	0.0568815	0.0786166	0.0782157	0.0867546	0.0774769	0.0634567	0.0727623	0.0612134	0.102681	0.0712527	0.0464558	0.0911729	0.0565625	0.118872	0.0895158	0.0297784	0.053065
74.85	0.0879862	0.133754	0.0452101	0.0972246	0.0370704	0.0354551	0.098062	0.0599015	0.0803429	0.0310049	0.102958	0.118865	0.0645178	0.0471718	0.0572771	0.0904714	0.0785556	0.0251592	0.105372	0.0638421	0.155286	0.0639277	0.0657333	0.0706266
75.869	0.0729911	0.144257	0.0506592	0.10841	0.0464593	0.0296918	0.108366	0.0554201	0.0832691	0.0554808	0.130853	0.0937085	0.068237	0.0574412	0.0603603	0.105471	0.0416904	0.0538159	0.113691	0.0644955	0.10319	0.073461	0.101732	0.057197
76.883	0.0496942	0.175021	0.0550439	0.12209	0.0678734	0.038321	0.112802	0.0851007	0.12241	0.0479575	0.0845825	0.0966031	0.046383	0.0682012	0.0721379	0.0620467	0.104713	0.0514309	0.107529	0.0688654	0.0824167	0.0749813	0.107027	0.0612867
77.9	0.0724204	0.15538	0.0531551	0.113947	0.049504	0.0246572	0.0690795	0.0858362	0.130455	0.0405408	0.112675	0.083642	0.0545596	0.0437461	0.0669868	0.110303	0.111995	0.0436735	0.125215	0.0700854	0.101045	0.080548	0.0551462	-0.0079782
78.92	0.0689036	0.153549	0.033458	0.110225	0.0375816	0.0349967	0.141584	0.0730824	0.117888	0.0600357	0.0720277	0.0945335	0.0484176	0.0572885	0.0458903	0.109985	0.0735586	0.0445443	0.10539	0.0705009	0.076352	0.0809751	0.0795683	0.122216
79.926	0.076772	0.1433	0.0475234	0.147917	0.0487096	0.0148097	0.0813771	0.061905	0.0828184	0.092098	0.0926539	0.0874946	0.0658589	0.0437988	0.0547045	0.0663963	0.0946484	0.0536444	0.10057	0.0707893	0.0551001	0.0942007	0.023616	0.0933595
80.937	0.0522159	0.173266	0.0301518	0.120063	0.0539791	0.0316726	0.101369	0.085447	0.127637	0.0088257	0.0876601	0.0890649	0.0571453	0.0628751	0.0699692	0.085768	0.0816805	0.0530755	0.106577	0.0740709	0.0852993	0.089438	0.0424221	0.0549156
81.946	0.0858344	0.164151	0.0414311	0.162502	0.0770678	0.0325078	0.114097	0.114552	0.126036	0.102451	0.0754754	0.103911	0.0712874	0.0496141	0.0757288	0.130682	0.082395	0.0614267	0.135528	0.0692179	0.117657	0.0706328	0.145073	0.0680964
82.966	0.0701802	0.128244	0.0691319	0.122612	0.0436232	0.0232636	0.110585	0.0977681	0.111028	0.0946641	0.0974057	0.0869424	0.071554	0.0619788	0.0677296	0.0796906	0.102592	0.0408521	0.107783	0.0542754	0.102748	0.0414968	0.151919	0.129475
83.977	0.0740455	0.148126	0.0424246	0.128797	0.0483606	0.0268236	0.100983	0.0693797	0.127559	0.0156945	0.0943217	0.110783	0.067145	0.0427015	0.0538341	0.0676228	0.0992631	0.0528897	0.105319	0.0641757	0.0932142	0.0967389	0.114328	0.0543477
84.996	0.0861367	0.174165	0.048903	0.116038	0.0524183	0.0339371	0.0907991	0.115335	0.101904	0.0233792	0.0669166	0.0964659	0.0607362	0.0439167	0.0690496	0.0617742	0.0912097	0.0374024	0.105128	0.0741998	0.0692587	0.112075	0.00774672	0.0336731
86.016	0.0736547	0.173524	0.00902967	0.124532	0.0571135	0.0361795	0.116079	0.095412	0.096603	0.0868154	0.103165	0.0879108	0.0630462	0.0411225	0.067816	0.0723508	0.0708083	0.0415225	0.126716	0.0582355	0.0658044	0.084928	0.143539	0.0197684
87.027	0.0794691	0.13281	0.0561437	0.12504	0.0474637	0.0612099	0.0980712	0.0978561	0.098363	0.0753662	0.0927636	0.080641	0.0683694	0.0419131	0.0817639	0.0936194	0.106053	0.0603187	0.113849	0.0862044	0.0888635	0.0732034	0.0693946	0.0719841
88.036	0.103822	0.145769	0.0448583	0.144144	0.0554248	0.0390996	0.100711	0.0427476	0.113432	0.113969	0.0891018	0.0963492	0.0861754	0.0780227	0.07544	0.0820354	0.0909209	0.0592945	0.14341	0.0699705	0.0663477	0.0700117	0.124393	0.0975318
89.056	0.0888103	0.148585	0.0499772	0.104862	0.0700585	0.0386366	0.101797	0.0621119	0.0892898	0.0460628	0.0582644	0.1174	0.0611896	0.0719291	0.0567114	0.093128	0.102276	0.042766	0.134483	0.0621933	0.0986015	0.10727	0.0997417	0.0435197
90.056	0.101974	0.148031	0.0347301	0.112942	0.0689745	0.0222095	0.0716014	0.0666526	0.0954604	0.0706782	0.0630975	0.0802776	0.0652922	0.0607929	0.0613539	0.0503529	0.0602917	0.0550528	0.102683	0.0554756	0.0897096	0.0996102	0.0340548	0.0975796
91.076	0.0674543	0.183436	0.075607	0.133227	0.0748222	0.0506417	0.112804	0.0639318	0.0909878	0.0997817	0.0580581	0.0824914	0.10074	0.0548739	0.0567117	0.132479	0.121236	0.0510765	0.136545	0.0638194	0.0905395	0.0291398	0.0302241	0.0620848
92.096	0.0903571	0.149463	0.0528476	0.127784	0.101152	0.0344758	0.0949457	0.0676251	0.108622	0.121031	0.061797	0.126834	0.0683061	0.0572272	0.0627249	0.0652376	0.098754	0.0363506	0.130688	0.0797014	0.090858	0.0756022	0.0970126	0.0991016
93.107	0.0814377	0.159138	0.0644922	0.106384	0.0924296	0.0405177	0.120998	0.0754307	0.088645	0.0456285	0.0653996	0.135466	0.0708437	0.0579531	0.0855211	0.0844009	0.117684	0.0466844	0.136486	0.0738049	0.0995906	0.0755335	0.0837946	0.0525563
94.113	0.0760821	0.169163	0.0319621	0.202808	0.0722739	0.0352861	0.11932	0.0781806	0.112591	0.0792257	0.077345	0.123518	0.0707141	0.0581252	0.0556445	0.0669661	0.105037	0.0594747	0.14146	0.0569934	0.133198	0.0677683	0.0773912	0.0416585
95.133	0.0913467	0.15384	0.0499268	0.123077	0.0650624	0.0221105	0.123362	0.0843778	0.115233	0.067844	0.0875107	0.100329	0.0679142	0.0498981	0.0535541	0.0960165	0.107111	0.0446602	0.0972578	0.0727063	0.110503	0.0357677	0.0476225	0.0479113
96.146	0.0959209	0.142616	0.0754604	0.162418	0.0652115	0.0488817	0.0794612	0.0741578	0.111035	0.0490613	0.0959168	0.0933545	0.06913	0.0625678	0.0717722	0.0761224	0.0793971	0.0497037	0.14891	0.0719255	0.126813	0.0939672	0.195337	0.118308
97.166	0.0911652	0.143815	0.0271923	0.135942	0.084899	0.0388114	0.0974421	0.0722763	0.0960125	0.0563061	0.0919693	0.101048	0.0724152	0.0609522	0.055131	0.0785149	0.0854249	0.00889048	0.159088	0.0730229	0.0925135	0.0939472	0.143263	0.13388
98.172	0.0861184	0.133969	0.0445205	0.108374	0.0742671	0.0352823	0.0889269	0.0805687	0.11371	0.0672264	0.0900006	0.0899655	0.0872358	0.0583751	0.0726097	0.0996227	0.129633	0.0251365	0.103588	0.0856726	0.0819338	0.0592733	0.0849369	0.148203
99.192	0.0905034	0.134035	0.0594213	0.144173	0.0807277	0.0317345	0.0956171	0.0585345	0.103884	0.0830567	0.0916825	0.119338	0.0899715	0.0782288	0.0735231	0.0991681	0.105021	0.0233173	0.13733	0.0770751	0.0676134	0.112685	0.0328568	0.103198
100.215	0.0998439	0.153431	0.0384176	0.0828121	0.0735715	0.0412875	0.118705	0.0690233	0.119087	0.0695514	0.0752007	0.0881825	0.085623	0.0802645	0.0659554	0.0989018	0.116108	0.0301949	0.134262	0.0623611	0.134687	0.0760574	0.172286	0.0990563
101.229	0.0834143	0.171139	0.0455656	0.126941	0.0566645	0.0323861	0.101515	0.0625476	0.0915132	0.0524973	0.0523512	0.102512	0.0801633	0.0653989	0.0686849	0.0948698	0.109913	0.0297711	0.16605	0.0787587	0.0977857	0.0593047	0.0547819	0.107049
102.237	0.088411	0.181002	0.05843	0.0837712	0.0658547	0.0400245	0.128011	0.066145	0.0798901	0.0603114	0.0880879	0.0986965	0.0817934	0.07499	0.0643668	0.131992	0.128845	0.0303654	0.122363	0.076901	0.0719996	0.117554	0.0528095	0.153123
103.274	0.087976	0.19032	0.0552513	0.0931121	0.0762941	0.0462566	0.124333	0.0885553	0.0937442	0.071517	0.0659185	0.1314	0.1097	0.0851207	0.0796003	0.137787	0.101581	0.0379849	0.119273	0.101321	0.0505031	0.0803701	0.127867	0.127166
104.288	0.0816744	0.104912	0.0607618	0.148178	0.0884209	0.0450828	0.0769181	0.0775482	0.0884124	0.0844835	0.0974735	0.0963556	0.0967308	0.0745459	0.0708272	0.139273	0.122855	0.0287105	0.124945	0.0617977	0.165399	0.112351	0.168395	0.149173
105.308	0.108567	0.180142	0.0169372	0.137539	0.0631569	0.0454469	0.100661	0.0777805	0.0889076	0.0948748	0.0541561	0.120919	0.0844708	0.0665331	0.058473	0.124876	0.120311	0.0576773	0.103744	0.0757363	0.129512	0.0517542	0.0851076	0.0358488
106.319	0.130338	0.159849	0.0508825	0.154099	0.0711021	0.0737074	0.130163	0.0766868	0.0922035	0.117244	0.0701643	0.0719362	0.0627369	0.041227	0.0597711	0.0660325	0.119324	0.0227893	0.138826	0.0922581	0.0799254	0.0918557	0.035573	0.132378
107.328	0.111688	0.125318	0.0751181	0.189502	0.08566	0.0565928	0.093557	0.113174	0.0774056	0.0765883	0.0724429	0.0931517	0.0929346	0.065966	0.0792699	0.12683	0.108323	0.0301247	0.134462	0.0612865	0.105082	0.0646273	0.109924	0.0800534
108.367	0.10902	0.153575	0.0595667	0.167098	0.0822646	0.0486126	0.11755	0.094341	0.0800854	0.130499	0.0729877	0.133429	0.0844792	0.0873281	0.0712631	0.0859536	0.0974435	0.0297909	0.139242	0.0819636	0.117242	0.0938211	0.0490344	0.155236
109.378	0.0880169	0.170478	0.0281314	0.106932	0.0604503	0.0492425	0.138862	0.070254	0.0816273	0.0949726	0.0789689	0.099207	0.0903007	0.0592369	0.0798582	0.0987155	0.119462	0.0507467	0.168006	0.0961508	0.149038	0.0452632	0.0672288	0.142654
110.387	0.108441	0.179686	0.05119	0.169355	0.0995752	0.0516644	0.112834	0.0555541	0.0891719	0.11833	0.0695511	0.107122	0.082954	0.0715301	0.0437381	0.143215	0.0963715	0.0433655	0.127236	0.066791	0.121376	0.0851769	9.17997e-05	0.0648131
111.398	0.0884709	0.150259	0.0773172	0.133153	0.0803177	0.0754238	0.117816	0.0834353	0.100672	0.0900763	0.0668203	0.0960549	0.0950004	0.0738814	0.0661454	0.146749	0.112303	0.0504189	0.157005	0.0873526	0.127615	0.075577	0.0931173	0.173111
112.418	0.100661	0.152281	0.0659797	0.191995	0.0653892	0.064203	0.118422	0.0618289	0.119221	0.085617	0.0670524	0.103789	0.0957367	0.0616398	0.0924982	0.0990916	0.101614	0.0417808	0.183417	0.0797094	0.137868	0.0861324	0.0750651	0.157965
113.441	0.102327	0.155422	0.0487749	0.240764	0.0460584	0.0765609	0.0998204	0.077804	0.10733	0.0623686	0.0888109	0.0933968	0.056419	0.0629077	0.0543014	0.112891	0.0932774	0.0362784	0.112231	0.093151	0.099891	0.0652187	0.0599286	0.137178
114.447	0.10785	0.190095	0.0467953	0.122049	0.061314	0.0496134	0.0880458	0.0763444	0.120532	0.0679285	0.0860162	0.129491	0.0725324	0.0580984	0.0856845	0.144708	0.115444	0.0447425	0.130283	0.0697179	0.137682	0.11963	0.0813421	0.12945
115.48	0.116298	0.1819	0.0594218	0.143758	0.068374	0.0636765	0.0994767	0.0893212	0.100959	0.0799243	0.0775289	0.114938	0.0863136	0.093836	0.0515129	0.0992793	0.120064	0.0529943	0.098531	0.0828128	0.123505	0.0849074	0.176802	0.184375
116.497	0.0720374	0.148339	0.0695968	0.110887	0.0518146	0.0650211	0.104315	0.0824657	0.100488	0.0613937	0.0858663	0.10227	0.112874	0.0460655	0.0704322	0.075896	0.0719866	0.0690593	0.142886	0.0803414	0.0688788	0.0815952	0.12162	0.162054
117.506	0.0739031	0.221151	0.0716045	0.124017	0.114586	0.0599778	0.0931873	0.0715055	0.103463	0.066612	0.0816718	0.0925936	0.091602	0.0604932	0.057524	0.114601	0.112069	0.0435794	0.119411	0.108052	0.143821	0.0667363	0.15129	0.145137
118.52	0.118864	0.160615	0.0709374	0.143074	0.0829891	0.0459823	0.0749874	0.0608153	0.0897589	0.128128	0.0621507	0.118847	0.102726	0.0644501	0.0629974	0.102733	0.140325	0.05189	0.14334	0.0993824	0.0975442	0.0663244	0.165052	0.140118
119.537	0.11205	0.180712	0.0593078	0.12736	0.0876237	0.0443526	0.10055	0.0878605	0.0902332	0.133131	0.0821754	0.126582	0.115152	0.0674647	0.0773227	0.0637315	0.120957	0.0461787	0.159769	0.0850181	0.108897	0.151648	0.138231	0.0995193
120.548	0.0907579	0.173547	0.0538502	0.107575	0.0689312	0.0793584	0.122917	0.0818346	0.0982968	0.0932255	0.0802278	0.11091	0.0948982	0.0801708	0.0620142	0.0655793	0.128107	0.0513664	0.117437	0.0902177	0.132702	0.0702293	0.134713	0.193675
121.557	0.131336	0.18017	0.0757642	0.204572	0.0885459	0.0826049	0.0809327	0.0773142	0.115381	0.1392	0.0850185	0.102201	0.0981826	0.0522782	0.0857483	0.069932	0.104229	0.0644536	0.120408	0.081976	0.105271	0.0581756	0.108352	0.204207
122.574	0.109948	0.187268	0.0611679	0.120349	0.073976	0.0561797	0.123725	0.078033	0.110103	0.135192	0.0736576	0.0948919	0.120611	0.0430325	0.0709474	0.123094	0.0869983	0.0637902	0.149814	0.0912241	0.0959049	0.0714801	0.119019	0.134328
123.577	0.127717	0.174526	0.0554018	0.233838	0.0831061	0.0648083	0.102535	0.0928461	0.118746	0.088802	0.078464	0.0854073	0.11083	0.0808939	0.0884082	0.09435	0.0919982	0.0529158	0.195891	0.0572335	0.119999	0.0687378	0.0788934	0.184046
124.61	0.12893	0.152978	0.0592049	0.173115	0.0864213	0.0671188	0.0820234	0.0982988	0.0999833	0.0605213	0.0800408	0.0905055	0.086348	0.0759689	0.0852006	0.10488	0.0982304	0.0735655	0.163296	0.101335	0.110329	0.0682786	0.119054	0.0816084
125.619	0.121177	0.181778	0.0730396	0.187848	0.066003	0.0486563	0.139154	0.0798558	0.116393	0.0677272	0.105436	0.131929	0.117369	0.0647799	0.0630494	0.129193	0.125741	0.0630388	0.133626	0.0817398	0.102274	0.117931	0.140986	0.115036
126.63	0.099724	0.224296	0.0715443	0.203079	0.089879	0.0724868	0.0950375	0.0920659	0.098854	0.0771159	0.0937613	0.106467	0.100206	0.0611811	0.0853565	0.209299	0.11414	0.0513651	0.113936	0.0906786	0.119596	0.067814	0.137754	0.171184
127.639	0.119149	0.183741	0.0586903	0.146957	0.0792965	0.0624529	0.122374	0.0699879	0.0848068	0.0688453	0.0719901	0.108812	0.0786725	0.059228	0.0549368	0.106485	0.133745	0.0567504	0.164227	0.0759227	0.106668	0.0953587	0.0862525	0.163501
128.659	0.11168	0.16225	0.0605234	0.15393	0.100457	0.069057	0.0973182	0.0826323	0.0890245	0.0737304	0.0904923	0.132211	0.0895376	0.0754846	0.0817136	0.0619973	0.101243	0.0592672	0.139361	0.0899268	0.0953238	0.0699749	0.0981791	0.139123
129.664	0.0998778	0.147108	0.0576516	0.175698	0.0920627	0.0659383	0.0945023	0.070437	0.0930372	0.0580979	0.0755897	0.101182	0.115684	0.07082	0.0802838	0.0379609	0.110041	0.0495895	0.170842	0.0816536	0.111036	0.0995538	0.15503	0.179233
130.699	0.1164	0.154868	0.0646317	0.175564	0.0743156	0.0669158	0.108189	0.0744173	0.0752107	0.058698	0.0661689	0.0925026	0.108119	0.0778993	0.0855452	0.0810889	0.109044	0.0423651	0.134711	0.0955675	0.108305	0.0821018	0.166962	0.20483
131.719	0.113924	0.183642	0.126883	0.136621	0.110803	0.0492491	0.102836	0.0876001	0.0788984	0.123913	0.0749651	0.117455	0.096677	0.0592132	0.0857962	0.0997138	0.131681	0.0548302	0.10394	0.0826312	0.101894	0.0454548	0.0960786	0.254021
132.726	0.117874	0.181103	0.0789565	0.143627	0.102014	0.0592304	0.123349	0.072838	0.118491	0.082747	0.0699694	0.117419	0.104804	0.0519419	0.0776324	0.0715154	0.135489	0.0619238	0.139493	0.0909675	0.12189	0.0767623	0.0648064	0.21312
133.746	0.127029	0.144014	0.0862278	0.185337	0.0699308	0.0502066	0.108131	0.0777062	0.0955993	0.0718052	0.0633892	0.125166	0.106182	0.0458759	0.0821025	0.105288	0.112452	0.0598917	0.173051	0.1232	0.107588	0.0620769	0.0919578	0.0809276
134.766	0.113465	0.157372	0.0964516	0.168941	0.086632	0.0570413	0.0793272	0.0873575	0.077754	0.0914118	0.0807275	0.109275	0.0774126	0.0490596	0.0804737	0.0945553	0.110493	0.0697784	0.201767	0.119457	0.10548	0.0696388	0.13282	0.189436
135.792	0.116855	0.151107	0.0564154	0.139958	0.0929869	0.0511078	0.128	0.0923094	0.103013	0.0662939	0.0837389	0.0962051	0.100723	0.0723923	0.086762	0.0377435	0.12107	0.0577466	0.121105	0.119035	0.152176	0.0533534	0.138163	0.219461
136.792	0.120212	0.197104	0.0922134	0.170841	0.0796784	0.0713139	0.124922	0.060146	0.0841178	0.0369703	0.102033	0.11595	0.0933064	0.0618691	0.069393	0.089352	0.104203	0.0414155	0.164864	0.0891614	0.104479	0.087152	0.171562	0.246999
137.822	0.132713	0.133288	0.101866	0.137924	0.0601091	0.0635948	0.0899429	0.0876475	0.087116	0.121839	0.0480383	0.0905079	0.10749	0.0575427	0.0867814	0.0935214	0.10323	0.0313062	0.130299	0.0999554	0.122193	0.0883167	0.10407	0.13293
138.822	0.130604	0.169589	0.09349	0.223361	0.100558	0.0662971	0.0955714	0.0802199	0.0713052	0.0666269	0.0588559	0.11905	0.0879957	0.0750305	0.099505	0.162092	0.0799106	0.0362874	0.168634	0.102819	0.0983577	0.0789996	0.0504166	0.205774
139.842	0.118969	0.144103	0.107525	0.123851	0.0652829	0.0718476	0.0940789	0.0868944	0.0783019	0.075821	0.0981234	0.096728	0.117856	0.055726	0.0939654	0.106473	0.101677	0.0558285	0.155045	0.099651	0.0952647	0.0258604	0.134061	0.150692
140.848	0.146404	0.140422	0.0811122	0.104211	0.0988426	0.0663191	0.109004	0.0810064	0.0724194	0.0507665	0.0519461	0.0930113	0.121723	0.0371223	0.0838094	0.156834	0.0933255	0.0609084	0.162349	0.0977206	0.10065	0.0677461	0.176145	0.236156
141.871	0.116001	0.15932	0.0645184	0.183801	0.0925891	0.0591896	0.0947575	0.0645251	0.109332	0.0837868	0.0880571	0.099646	0.111722	0.0552285	0.0841292	0.0632159	0.113553	0.0708672	0.139237	0.0857305	0.122453	0.0769233	0.115489	0.267348
142.879	0.135648	0.132879	0.0874937	0.162303	0.0915843	0.0682888	0.080759	0.0561422	0.118168	0.0899784	0.108502	0.127645	0.124575	0.0509665	0.104687	0.108133	0.118067	0.049879	0.130807	0.0855373	0.0738915	0.0887156	0.128932	0.200422
143.891	0.13509	0.117105	0.0733079	0.22347	0.0883755	0.0558528	0.0895956	0.0642522	0.0924739	0.119511	0.081065	0.0974845	0.106055	0.0508017	0.0992477	0.0545934	0.120746	0.0370422	0.154514	0.086603	0.114001	0.0943448	0.170919	0.173205
144.911	0.119138	0.163651	0.0948856	0.167012	0.0588661	0.0850838	0.108419	0.0677942	0.0862904	0.0822351	0.1041	0.10382	0.0930448	0.053103	0.0833399	0.0865498	0.11189	0.0698219	0.178946	0.0783	0.112714	0.0896328	0.129916	0.206405
145.941	0.12109	0.139855	0.0744506	0.202961	0.0700641	0.0681357	0.0650742	0.0825	0.112833	0.0435514	0.0624487	0.144444	0.0946511	0.0583239	0.090925	0.081809	0.108137	0.0770041	0.141114	0.10282	0.0689917	0.0457237	0.131224	0.194268
146.958	0.087783	0.158394	0.0598221	0.162911	0.0638108	0.063416	0.083754	0.0757149	0.114943	0.105665	0.0511265	0.107879	0.0943229	0.0630351	0.0836241	0.0946784	0.108315	0.0847343	0.142258	0.0904829	0.0873261	0.0562856	0.119052	0.287776
147.967	0.122286	0.127595	0.0854768	0.181576	0.075312	0.0610382	0.0970554	0.0958463	0.137696	0.0948226	0.0575341	0.112175	0.128083	0.0782725	0.10544	0.0885101	0.108164	0.0322486	0.127666	0.0908385	0.113909	0.0618163	0.147715	0.108636
148.984	0.134076	0.155133	0.118152	0.135113	0.0833959	0.0673462	0.104964	0.09342	0.102271	0.0837862	0.0912677	0.116456	0.110177	0.0547484	0.0988358	0.152085	0.114362	0.0521722	0.160316	0.0825397	0.130779	0.111267	0.0731224	0.100198
150.017	0.127528	0.16194	0.0768436	0.207249	0.0985479	0.0689217	0.0773229	0.092187	0.110589	0.0691889	0.0956214	0.115483	0.116035	0.0557848	0.113248	0.0874678	0.116236	0.0682782	0.152791	0.105347	0.0915455	0.102579	0.0938694	0.176665
151.027	0.129727	0.137085	0.102252	0.189907	0.0575233	0.0594852	0.0989916	0.0929811	0.101949	0.0970647	0.0684894	0.104577	0.108095	0.054398	0.0916737	0.11436	0.111146	0.0564008	0.160938	0.0961916	0.114262	0.0799293	0.116485	0.173918
152.043	0.135163	0.151917	0.0645241	0.182154	0.0795787	0.0572249	0.0862028	0.123779	0.07912	0.102339	0.0740415	0.101303	0.0925346	0.0618224	0.0812006	0.0778857	0.107199	0.0411823	0.140834	0.0991808	0.0858138	0.0851771	0.201422	0.229355
153.051	0.133031	0.127873	0.0883044	0.167911	0.0598844	0.0634898	0.0761827	0.107672	0.0963256	0.108068	0.0834629	0.122492	0.0918522	0.0516979	0.0965126	0.14293	0.118755	0.0311819	0.145678	0.0856689	0.140321	0.0959642	0.116318	0.130379
154.083	0.121167	0.111242	0.0976162	0.167848	0.0923782	0.0503406	0.0790945	0.107726	0.110526	0.0823867	0.116227	0.109409	0.107103	0.0728009	0.0979507	0.103346	0.141355	0.053711	0.121875	0.11009	0.0966485	0.0859402	0.137903	0.100616
155.103	0.141139	0.122812	0.0888921	0.23347	0.0825861	0.0651324	0.0728917	0.0822607	0.0960961	0.133982	0.0829564	0.123953	0.121582	0.0503555	0.0752004	0.0841754	0.102726	0.0271464	0.13507	0.112232	0.126002	0.0799684	0.0947736	0.185465
156.114	0.140222	0.154963	0.10084	0.176309	0.0787378	0.0584627	0.0981006	0.0933696	0.0955928	0.100999	0.0943214	0.0923379	0.0948657	0.0693955	0.116438	0.13423	0.134989	0.069901	0.164775	0.0951954	0.100062	0.109797	0.13434	0.141204
157.123	0.116222	0.108567	0.12523	0.194195	0.0784894	0.0580215	0.0953919	0.102405	0.0838084	0.0986939	0.0968105	0.151283	0.0938991	0.0657598	0.09907	0.170075	0.114384	0.037258	0.175923	0.0877511	0.0739651	0.101696	0.138599	0.200499
158.143	0.130441	0.105733	0.0705691	0.169644	0.0722502	0.0600416	0.0804321	0.076872	0.0947416	0.0405	0.079937	0.131659	0.118922	0.0703134	0.0916323	0.0852682	0.11772	0.0398555	0.150334	0.0989132	0.102116	0.0766313	0.0688486	0.162067
159.153	0.143974	0.147711	0.0939197	0.151634	0.0926207	0.0758969	0.124528	0.0926188	0.12676	0.123718	0.0854231	0.151758	0.101892	0.0694541	0.103536	0.121092	0.124571	0.0383264	0.18581	0.106489	0.112689	0.076507	0.0606349	0.167866
160.17	0.143805	0.114861	0.0825684	0.133	0.074167	0.0500706	0.0759105	0.0893801	0.0906899	0.111747	0.0818824	0.135017	0.099189	0.0604178	0.092176	0.0898458	0.120235	0.0523603	0.158983	0.0979304	0.0982712	0.128197	0.124239	0.158902
161.19	0.151763	0.128446	0.0953816	0.226234	0.0761419	0.0778007	0.0872227	0.115358	0.070126	0.144443	0.0842657	0.108623	0.100934	0.0964557	0.106889	0.0896343	0.106615	0.0571871	0.181766	0.112902	0.101281	0.0566428	0.117089	0.142868
162.19	0.129296	0.169912	0.0833255	0.229739	0.078033	0.080424	0.0549533	0.108648	0.102316	0.0649613	0.0912924	0.143017	0.112096	0.075132	0.0863603	0.0888634	0.118163	0.0656853	0.181929	0.0873218	0.11391	0.101813	0.0700308	0.257182
163.213	0.128099	0.103417	0.0687446	0.155038	0.0710574	0.0798353	0.0966562	0.0826702	0.0909442	0.0830044	0.0686524	0.124015	0.0879714	0.0745713	0.107629	0.0959118	0.116364	0.0501226	0.158146	0.0927388	0.0944349	0.0801375	0.126075	0.317638
164.224	0.146488	0.138433	0.0898422	0.197998	0.0946627	0.0692098	0.0958532	0.104615	0.0895196	0.0555952	0.113149	0.146131	0.118878	0.0777015	0.0966361	0.0935736	0.122083	0.0549268	0.143428	0.133945	0.100404	0.0687393	0.14792	0.331649
165.262	0.127417	0.109006	0.0922667	0.168325	0.0671773	0.09001	0.065193	0.0924296	0.0831185	0.102823	0.0973561	0.151744	0.1141	0.0397237	0.0946028	0.111105	0.097483	0.0600654	0.182791	0.113137	0.133379	0.106204	0.102331	0.249643
166.281	0.143871	0.118504	0.108852	0.143551	0.102412	0.071927	0.0710659	0.0994841	0.0755859	0.0902829	0.0964411	0.136058	0.0889679	0.0689246	0.109113	0.14776	0.13251	0.0529327	0.142116	0.105687	0.0914705	0.0808053	0.11593	0.262243
167.292	0.140398	0.119486	0.140271	0.120327	0.0820343	0.0846998	0.0983019	0.107348	0.0765479	0.00962056	0.105813	0.154728	0.105628	0.0695286	0.114782	0.120677	0.106301	0.0629442	0.149596	0.104799	0.106547	0.0923844	0.0991741	0.253805
168.312	0.140804	0.123775	0.0913954	0.196063	0.106839	0.0839246	0.0733589	0.109705	0.0733571	0.0527364	0.0878274	0.13999	0.0698365	0.064557	0.10044	0.144836	0.119657	0.059725	0.166453	0.0986337	0.121	0.0749089	0.121988	0.2544
169.338	0.147862	0.107626	0.109526	0.189099	0.109555	0.0611054	0.108411	0.0980055	0.0660005	0.106876	0.0683348	0.12632	0.118092	0.07318	0.0976092	0.0964036	0.143891	0.0520241	0.199917	0.110529	0.105424	0.114333	0.147742	0.18831
170.342	0.130414	0.144776	0.12163	0.108958	0.0800903	0.0731122	0.116465	0.106112	0.0730067	0.0432647	0.110431	0.165417	0.0992429	0.0659929	0.118364	0.0836484	0.126716	0.0656151	0.166346	0.0822859	0.100847	0.0980983	0.197909	0.270173
171.352	0.115044	0.108139	0.124795	0.169949	0.111878	0.0826005	0.118097	0.115425	0.0657547	0.0698496	0.0684179	0.15656	0.0997865	0.0688407	0.122455	0.106297	0.13043	0.0394514	0.125684	0.102019	0.129409	0.0907102	0.144879	0.32484
172.362	0.13809	0.108548	0.0692172	0.166339	0.0972767	0.0681673	0.108648	0.0975208	0.073109	0.0437632	0.066808	0.142798	0.14341	0.0689351	0.118501	0.134286	0.127696	0.0629596	0.134505	0.114306	0.0880082	0.0766615	0.103224	0.246089
173.385	0.139025	0.13166	0.0830471	0.190637	0.0866308	0.067004	0.0695409	0.107245	0.0631897	0.126849	0.0950023	0.127933	0.118351	0.050884	0.133276	0.0825917	0.138713	0.0758599	0.208898	0.102629	0.098625	0.1334	0.138356	0.260793
174.399	0.140145	0.156743	0.0876799	0.217088	0.094665	0.0897015	0.0879853	0.0765927	0.0858293	0.00920677	0.106901	0.131682	0.104093	0.062675	0.117284	0.190257	0.141888	0.0701386	0.169611	0.125765	0.124667	0.0671387	0.144743	0.199399
175.405	0.115546	0.13163	0.088723	0.143794	0.0792707	0.0919705	0.0845656	0.11832	0.0653988	0.118421	0.0975491	0.139771	0.139229	0.0644193	0.121793	0.129405	0.132528	0.065255	0.174787	0.114314	0.0965491	0.0473589	0.133948	0.199082
176.428	0.139782	0.115704	0.0831022	0.259476	0.099196	0.0582475	0.0794559	0.102469	0.07942	0.0929828	0.09683	0.117215	0.107473	0.044511	0.11386	0.0980231	0.109656	0.0693224	0.161792	0.116939	0.133226	0.102482	0.17835	0.23434
177.439	0.124766	0.141075	0.0829939	0.104505	0.0875018	0.085975	0.0876173	0.0995059	0.0737282	0.124348	0.0716114	0.125196	0.0932829	0.0559559	0.126739	0.146914	0.124955	0.0573758	0.207196	0.107064	0.105312	0.0580884	0.146355	0.283744
178.459	0.134058	0.10979	0.0622605	0.214614	0.0997678	0.0551867	0.091376	0.0995168	0.0932345	0.109567	0.0870881	0.126394	0.115845	0.0669285	0.108981	0.146049	0.123092	0.0522863	0.16282	0.125735	0.078317	0.0924386	0.132663	0.190025
179.468	0.121055	0.122821	0.10395	0.173269	0.0833617	0.0764932	0.0838221	0.101311	0.0994347	0.0690601	0.0712595	0.118655	0.119718	0.077416	0.111919	0.166391	0.120515	0.0749409	0.230883	0.0996325	0.109832	0.0634243	0.124573	0.192294
180.498	0.137826	0.117358	0.070291	0.196145	0.0890962	0.0751022	0.0914886	0.114924	0.111768	0.108757	0.0899317	0.129535	0.111521	0.0898447	0.100659	0.118911	0.104155	0.0665788	0.165331	0.113545	0.0839759	0.0927761	0.145031	0.162698
181.572	0.128322	0.110485	0.110871	0.210042	0.0715905	0.0642864	0.0816108	0.097857	0.0726466	0.124171	0.123015	0.112317	0.100756	0.0834758	0.116431	0.119062	0.12347	0.0682981	0.131074	0.112917	0.109807	0.107236	0.108562	0.111693
182.595	0.136728	0.128838	0.113179	0.211234	0.0847168	0.0662335	0.111777	0.0797837	0.0926945	0.0849786	0.103425	0.147761	0.127555	0.0643487	0.115129	0.0830484	0.137248	0.0725249	0.177311	0.119928	0.104617	0.114829	0.0981508	0.291758
183.602	0.141071	0.120802	0.126136	0.213336	0.0755902	0.0698201	0.0857199	0.085813	0.0764443	0.0777001	0.0975279	0.118312	0.0949546	0.0582966	0.114965	0.148109	0.0888191	0.0758001	0.204839	0.102729	0.089899	0.0644918	0.0558961	0.190095
184.612	0.163209	0.112514	0.116064	0.129792	0.0743589	0.085486	0.090776	0.124111	0.077278	0.140469	0.0981795	0.0950776	0.115128	0.0567419	0.103726	0.121282	0.120064	0.0504328	0.141705	0.137773	0.0926113	0.0663144	0.0934428	0.223712
185.632	0.092045	0.12493	0.0904684	0.197618	0.0854786	0.0826006	0.0900065	0.0761122	0.0938276	0.0830075	0.092994	0.132415	0.131861	0.0624581	0.119859	0.0924467	0.116832	0.0655854	0.163888	0.102168	0.0943087	0.0613865	0.143679	0.335655
186.636	0.114697	0.126818	0.0787537	0.161714	0.0925755	0.0843324	0.0882625	0.0980664	0.0887487	0.12335	0.0938317	0.129744	0.123402	0.0620147	0.123781	0.162377	0.118411	0.0506492	0.187319	0.112803	0.10156	0.0894715	0.138615	0.227117
187.652	0.13922	0.151776	0.116799	0.243368	0.0775403	0.081895	0.0668293	0.0608521	0.0899784	0.107784	0.0896882	0.158572	0.129749	0.0683417	0.110652	0.144904	0.129413	0.0639652	0.162617	0.0830761	0.1086	0.0335146	0.12747	0.237167
188.671	0.106434	0.143363	0.113687	0.230845	0.0740402	0.0653678	0.107458	0.101224	0.0877066	0.0913518	0.15051	0.131535	0.139576	0.0547162	0.113874	0.078782	0.125339	0.0566627	0.192621	0.13304	0.125776	0.110297	0.091839	0.302592
189.696	0.136715	0.148405	0.0950865	0.180224	0.0884919	0.0651936	0.0864587	0.114675	0.0868702	0.133058	0.110423	0.186141	0.125961	0.085199	0.126643	0.0967585	0.139242	0.0635989	0.191442	0.105637	0.1107	0.0611321	0.143887	0.291376
190.705	0.1078	0.14373	0.0773705	0.163919	0.114108	0.0848916	0.141323	0.12161	0.0947294	0.131258	0.120749	0.122914	0.133233	0.0620473	0.127917	0.140425	0.1322	0.0563537	0.186147	0.107691	0.0729024	0.0916437	0.21281	0.23498
191.713	0.14267	0.17524	0.101103	0.191702	0.0807537	0.0887556	0.114684	0.125972	0.092036	0.0719162	0.116626	0.144404	0.137181	0.0816396	0.109187	0.177526	0.114414	0.0604654	0.17948	0.110391	0.105543	0.0807083	0.073768	0.215744
192.722	0.129046	0.145508	0.076617	0.233638	0.0867023	0.0623864	0.0990095	0.113197	0.101718	0.133952	0.108164	0.113466	0.121984	0.0475131	0.104201	0.106799	0.119172	0.0574365	0.135479	0.122939	0.110183	0.131644	0.242766	0.224852
193.733	0.138942	0.110017	0.109795	0.186282	0.105012	0.0781675	0.0775921	0.117354	0.0806124	0.0801662	0.0813668	0.129388	0.135457	0.0809083	0.103859	0.129075	0.0950827	0.0617549	0.167959	0.110322	0.0928742	0.133717	0.138825	0.290777
194.752	0.126818	0.154967	0.073227	0.135971	0.0704471	0.0973847	0.139318	0.0869182	0.0769656	0.107566	0.111205	0.148251	0.127452	0.0692418	0.0959422	0.114198	0.114178	0.0731981	0.173173	0.0865687	0.102226	0.120403	0.145734	0.231524
195.762	0.137906	0.113484	0.121497	0.260002	0.0602359	0.0774548	0.105298	0.0895452	0.0862822	0.113641	0.139967	0.117258	0.146478	0.0645178	0.135758	0.146866	0.140385	0.0685957	0.186136	0.126168	0.137735	0.104755	0.120682	0.229044
196.792	0.122101	0.110797	0.123852	0.170591	0.0794599	0.0787489	0.083476	0.0767099	0.108201	0.0463054	0.107972	0.150124	0.14738	0.0592623	0.108364	0.120509	0.130042	0.06836	0.189909	0.123172	0.100424	0.129277	0.122983	0.188755
197.815	0.125384	0.115298	0.0954341	0.19041	0.104335	0.0834642	0.105078	0.113745	0.0859334	0.0730816	0.0906089	0.142181	0.114177	0.0536277	0.127457	0.0739733	0.15181	0.060264	0.174247	0.119383	0.0987361	0.134718	0.133221	0.17705
198.835	0.118466	0.12081	0.130318	0.15371	0.0809742	0.0677585	0.086161	0.0933417	0.0999791	0.072006	0.110107	0.105703	0.143062	0.0614371	0.10578	0.118731	0.11751	0.0521675	0.185243	0.12405	0.0960133	0.0830312	0.155109	0.149184
199.844	0.135138	0.105394	0.0646503	0.121988	0.0976161	0.0732867	0.094651	0.0880114	0.104404	0.0583411	0.120672	0.130654	0.118143	0.0713145	0.114723	0.0823764	0.129478	0.0671836	0.190625	0.106246	0.150762	0.0796265	0.103356	0.301407
200.855	0.13962	0.15304	0.0706274	0.178448	0.0982758	0.0686837	0.132022	0.10682	0.112354	0.0875823	0.0828972	0.143647	0.130532	0.0431256	0.112789	0.116434	0.119002	0.0362006	0.16942	0.123977	0.109414	0.0937174	0.10844	0.197075
201.861	0.10899	0.159294	0.0708665	0.141841	0.0661697	0.0753874	0.129352	0.0996663	0.114717	0.0976026	0.102301	0.110515	0.119151	0.0777998	0.0931787	0.134021	0.107014	0.0524875	0.207441	0.118292	0.123957	0.0641055	0.139208	0.1649
202.894	0.137863	0.142337	0.0821601	0.143728	0.0811616	0.0764227	0.115108	0.0945988	0.123712	0.05064	0.0732533	0.108452	0.112307	0.0570618	0.104198	0.106125	0.15237	0.0544878	0.175827	0.127062	0.153951	0.0676105	0.14402	0.240013
203.891	0.12295	0.140902	0.0997905	0.160636	0.0718755	0.0800523	0.11624	0.0957581	0.114088	0.0846909	0.0989006	0.136286	0.133273	0.0652767	0.135791	0.130834	0.123931	0.0539226	0.177011	0.144816	0.092611	0.114067	0.224905	0.290257
204.905	0.119421	0.122859	0.0897689	0.197161	0.0830484	0.0623811	0.0989542	0.126917	0.110867	0.0603786	0.139444	0.125214	0.140817	0.0655639	0.136984	0.0922594	0.166104	0.0672645	0.17815	0.102492	0.125494	0.107448	0.1382	0.136907
205.925	0.13386	0.127165	0.0819696	0.190838	0.0760839	0.0633799	0.117386	0.120178	0.0967178	0.089984	0.135986	0.160227	0.118692	0.0787074	0.10647	0.138855	0.137038	0.0526159	0.207163	0.11686	0.108421	0.101765	0.114813	0.281789
206.954	0.118663	0.0889751	0.0992961	0.226731	0.0694046	0.0649187	0.125552	0.119698	0.103768	0.10555	0.122706	0.112889	0.120176	0.0793524	0.107141	0.115781	0.124661	0.0424174	0.207224	0.129014	0.123578	0.107289	0.210984	0.255125
207.974	0.131319	0.135402	0.080079	0.159307	0.067117	0.0672353	0.122664	0.117716	0.118752	0.12286	0.0943074	0.156736	0.142128	0.0733273	0.119775	0.125862	0.144312	0.0697302	0.190257	0.108976	0.128127	0.0966714	0.139453	0.266137
208.984	0.104092	0.108606	0.0620425	0.278767	0.0777314	0.0792046	0.113531	0.120718	0.105012	0.0981286	0.117553	0.134492	0.144498	0.0586608	0.0936826	0.180506	0.154783	0.0573326	0.192575	0.110835	0.10671	0.145596	0.155255	0.28031
209.994	0.112658	0.10465	0.0826794	0.211566	0.102801	0.070285	0.106912	0.118829	0.112685	0.104152	0.101118	0.14279	0.11031	0.057469	0.090425	0.145996	0.108923	0.0603485	0.18452	0.122184	0.13218	0.0998057	0.118398	0.250188
211.013	0.107282	0.105574	0.0791049	0.219415	0.101054	0.0681274	0.122688	0.0888592	0.120362	0.0411968	0.120601	0.106505	0.145107	0.0817761	0.100574	0.116425	0.131129	0.0429434	0.183666	0.119339	0.109043	0.0811285	0.180506	0.202144
212.014	0.14388	0.138951	0.0889229	0.124162	0.0884498	0.104047	0.1265	0.0967161	0.104065	0.0562232	0.115415	0.171646	0.153225	0.0749173	0.103629	0.13705	0.117687	0.0600663	0.153762	0.100812	0.115043	0.0809974	0.129672	0.188774
213.036	0.114368	0.107977	0.0738722	0.165666	0.10769	0.0661886	0.0982143	0.10667	0.102193	0.0983436	0.0582532	0.171538	0.143539	0.065553	0.094041	0.0709312	0.133287	0.0553945	0.192579	0.0943184	0.129423	0.0949754	0.131535	0.293343
214.047	0.120174	0.143812	0.0787015	0.225753	0.105939	0.0787045	0.123044	0.124708	0.101844	0.0881575	0.0861774	0.135641	0.147093	0.0622924	0.117081	0.105556	0.123079	0.064638	0.211307	0.0994576	0.11037	0.0919595	0.139012	0.179495
215.07	0.131021	0.137269	0.075798	0.190642	0.0971836	0.0754325	0.134063	0.0912801	0.115095	0.106306	0.126787	0.155243	0.11845	0.0729865	0.113643	0.134917	0.129801	0.053842	0.204711	0.127285	0.0806999	0.0685132	0.168113	0.229223
216.073	0.127397	0.186528	0.0523835	0.20332	0.0957454	0.0915855	0.139304	0.0946933	0.0886178	0.151834	0.122997	0.144828	0.149288	0.0609291	0.105513	0.107587	0.12489	0.0423055	0.230939	0.111345	0.114819	0.0938078	0.167071	0.181889
217.09	0.122122	0.152416	0.0911386	0.137034	0.0908617	0.0713047	0.140706	0.0748721	0.133948	0.0846209	0.0869547	0.16551	0.129419	0.0837123	0.0787247	0.0847847	0.130754	0.0690103	0.185596	0.109923	0.145228	0.0415611	0.162815	0.421102
218.123	0.130952	0.158212	0.106521	0.154396	0.101885	0.0743421	0.144429	0.0794545	0.117969	0.0970525	0.104578	0.129589	0.132374	0.079178	0.117485	0.0943619	0.140684	0.0634685	0.207923	0.10316	0.102019	0.0770868	0.153447	0.246783
219.143	0.118359	0.126514	0.110563	0.21657	0.0829225	0.0859465	0.118751	0.0808355	0.100815	0.129948	0.104102	0.133677	0.140065	0.0636764	0.127728	0.11624	0.142824	0.0441081	0.213881	0.0950078	0.114528	0.154651	0.125856	0.207939
220.143	0.133202	0.125346	0.0933985	0.270269	0.0958501	0.0852761	0.135042	0.0839912	0.135609	0.0827329	0.14273	0.120485	0.150433	0.0780626	0.0926016	0.138335	0.0972636	0.0536873	0.233972	0.115826	0.0805716	0.104567	0.182442	0.192584
221.163	0.116719	0.122855	0.0560209	0.177664	0.0973247	0.0907924	0.120892	0.100693	0.113913	0.054247	0.0925367	0.146137	0.168174	0.0924139	0.0961428	0.135044	0.148537	0.059787	0.194765	0.11488	0.111706	0.14994	0.144397	0.238436
222.192	0.122028	0.103949	0.111415	0.20831	0.0908781	0.0749828	0.133674	0.103201	0.106426	0.100953	0.115003	0.126979	0.133271	0.074445	0.0872703	0.123872	0.120959	0.0627947	0.158995	0.127686	0.117664	0.0970111	0.18085	0.241233
223.209	0.120375	0.133187	0.110707	0.178866	0.0937334	0.08375	0.103104	0.112425	0.106545	0.04772	0.0997048	0.123286	0.152441	0.0559027	0.117523	0.172011	0.138405	0.0674815	0.211022	0.122501	0.0895698	0.122494	0.0883051	0.246009
224.219	0.107965	0.132185	0.113398	0.151933	0.0942279	0.0774011	0.152767	0.0929846	0.130008	0.0782653	0.0643871	0.12791	0.148729	0.0612142	0.110632	0.147131	0.118867	0.0576065	0.155542	0.110354	0.11033	0.129261	0.155599	0.22432
225.248	0.146614	0.137622	0.119526	0.200206	0.127515	0.0841983	0.112002	0.128968	0.125408	0.0515275	0.0770579	0.130069	0.145295	0.0825886	0.117124	0.138728	0.114407	0.0593977	0.194182	0.111987	0.0962129	0.103826	0.196212	0.262672
226.278	0.118716	0.141179	0.0959043	0.180533	0.115418	0.0810357	0.146912	0.112394	0.124316	0.115699	0.108227	0.184468	0.162302	0.0782281	0.0915987	0.152695	0.166678	0.0890482	0.199744	0.125568	0.095244	0.077427	0.14407	0.305845
227.301	0.0993325	0.141579	0.0990261	0.304972	0.089575	0.0873424	0.134626	0.0958431	0.0987175	0.029458	0.126967	0.145532	0.142179	0.0695361	0.104465	0.107222	0.139169	0.0756835	0.220452	0.12431	0.109179	0.0980425	0.128144	0.294613
228.307	0.110114	0.0997431	0.0956212	0.24641	0.0746333	0.0833481	0.11097	0.0628739	0.127498	0.137621	0.102853	0.135651	0.173562	0.0725348	0.100704	0.171019	0.119793	0.0870064	0.218828	0.108509	0.134284	0.128969	0.212103	0.29968
229.318	0.126461	0.132819	0.0977069	0.197395	0.0996564	0.0854892	0.0866392	0.0832658	0.131329	0.0569122	0.11664	0.140479	0.116231	0.0489093	0.135833	0.140986	0.153703	0.0685097	0.212844	0.114322	0.105534	0.0757926	0.150196	0.264086
230.361	0.0905823	0.12079	0.0891947	0.146852	0.0662228	0.08235	0.105543	0.122418	0.131951	0.110966	0.114646	0.164939	0.147658	0.0727045	0.113096	0.120533	0.132632	0.10464	0.252261	0.126057	0.10892	0.0878334	0.180358	0.17621
231.367	0.121511	0.105732	0.0831824	0.251506	0.0989952	0.0701106	0.122461	0.0835691	0.1306	0.107509	0.141041	0.15265	0.178864	0.0598465	0.102847	0.139825	0.115385	0.0638313	0.223393	0.105079	0.093054	0.0689793	0.175649	0.180176
232.381	0.114632	0.112529	0.108037	0.260781	0.0882067	0.0826376	0.172251	0.0924044	0.144409	0.0702998	0.101499	0.123462	0.16267	0.0514284	0.111708	0.145367	0.114174	0.060744	0.228892	0.110098	0.121493	0.0529476	0.163006	0.276406
233.39	0.116136	0.112018	0.0810944	0.211671	0.110965	0.0924785	0.163478	0.103514	0.0981781	0.0547649	0.0959009	0.124093	0.128123	0.0587436	0.133566	0.123729	0.112452	0.0601064	0.185926	0.120225	0.0920122	0.0899103	0.150378	0.493548
234.41	0.139946	0.141828	0.129467	0.192628	0.0791688	0.0837844	0.15642	0.0988557	0.117122	0.0689392	0.0666559	0.124639	0.149897	0.07361	0.112388	0.0532398	0.115754	0.0536643	0.199491	0.136087	0.0935285	0.0925222	0.151345	0.411252
235.42	0.128042	0.104931	0.0842068	0.337567	0.0877236	0.0850684	0.125034	0.122574	0.137448	0.0542881	0.108783	0.137924	0.171597	0.0480617	0.123348	0.13427	0.144188	0.0536551	0.213905	0.104649	0.11416	0.132492	0.189783	0.168937
236.44	0.130052	0.139629	0.0940721	0.234358	0.0823657	0.0799031	0.124056	0.0967902	0.157678	0.0579965	0.0860621	0.133664	0.15778	0.0765966	0.1349	0.158328	0.127532	0.0683422	0.197616	0.112825	0.109837	0.119842	0.203428	0.305282
237.46	0.124133	0.106691	0.0991452	0.198911	0.0861218	0.0770299	0.134618	0.142212	0.158395	0.100758	0.0949644	0.13517	0.16597	0.061732	0.0912234	0.0889573	0.091303	0.0609174	0.215363	0.119677	0.124821	0.114715	0.224651	0.291851
238.48	0.119444	0.138913	0.121926	0.245572	0.0906761	0.0845352	0.110853	0.12325	0.126026	0.0925647	0.116496	0.150412	0.130195	0.0787014	0.132069	0.153311	0.134473	0.0666405	0.204602	0.111966	0.108996	0.0787259	0.18417	0.316138
239.49	0.118342	0.130409	0.0997029	0.211681	0.0851076	0.0632959	0.126742	0.129636	0.144922	0.103514	0.124054	0.107024	0.174734	0.0778494	0.104614	0.163066	0.118014	0.0591245	0.257111	0.122505	0.129086	0.0990255	0.17196	0.26401
240.51	0.129873	0.129765	0.138615	0.185617	0.0902297	0.0697667	0.138825	0.100532	0.132055	0.158548	0.0861438	0.118703	0.167079	0.0490652	0.122441	0.15612	0.140159	0.0687612	0.20742	0.11771	0.12262	0.108984	0.176636	0.254441
241.53	0.108022	0.112743	0.0943428	0.135682	0.0859898	0.0903407	0.142402	0.0986837	0.147798	0.0636613	0.0870576	0.137956	0.143543	0.0609038	0.131624	0.144583	0.119119	0.0504272	0.218947	0.1408	0.109452	0.163826	0.158201	0.420116
242.55	0.127812	0.125505	0.141334	0.183674	0.110198	0.0766364	0.119024	0.0962638	0.1419	0.128651	0.0959729	0.160774	0.159544	0.0812403	0.11161	0.107706	0.111015	0.08268	0.253982	0.0992959	0.116595	0.14892	0.216027	0.276584
243.559	0.101086	0.155304	0.104575	0.13111	0.0948158	0.081868	0.103789	0.10138	0.162691	0.0365647	0.0882385	0.147061	0.16635	0.0527087	0.123588	0.148166	0.13012	0.055754	0.228379	0.0940988	0.0982167	0.0896248	0.116692	0.344604
244.715	0.129164	0.0998723	0.105329	0.172407	0.073063	0.0856312	0.123464	0.120467	0.155211	0.0747873	0.124119	0.124681	0.156676	0.0684262	0.110677	0.157036	0.162214	0.0742423	0.190218	0.118541	0.0834654	0.137143	0.202946	0.265223
245.609	0.0962866	0.141608	0.0886664	0.139487	0.0886176	0.090361	0.122696	0.0869623	0.144803	0.0862243	0.117825	0.145609	0.14463	0.0490994	0.105153	0.127641	0.140492	0.089892	0.176724	0.0948361	0.124327	0.154718	0.149058	0.32442
246.618	0.118952	0.130433	0.0977162	0.224655	0.100403	0.0827615	0.111385	0.101896	0.149414	0.082893	0.143612	0.137172	0.170376	0.054384	0.112487	0.071881	0.13283	0.0804145	0.230493	0.0990416	0.0670594	0.141889	0.140513	0.255535
247.638	0.140902	0.135772	0.0904045	0.232936	0.0869648	0.0783005	0.129052	0.114955	0.149304	0.08194	0.109433	0.136842	0.166524	0.0746677	0.095046	0.146869	0.157839	0.0666235	0.199826	0.137441	0.106787	0.173386	0.17383	0.24131
248.649	0.122787	0.141584	0.0970152	0.177956	0.0947855	0.0720258	0.107208	0.113037	0.125929	0.100686	0.0801771	0.121812	0.152971	0.0618514	0.0870492	0.136692	0.129583	0.0427633	0.2337	0.106542	0.107675	0.128344	0.150874	0.205066
249.678	0.107872	0.173458	0.12705	0.258823	0.0744792	0.0825111	0.13581	0.109045	0.132821	0.126168	0.103934	0.145565	0.170688	0.0932405	0.12392	0.105245	0.135757	0.0676283	0.251691	0.122225	0.0644394	0.106617	0.126604	0.34301
250.688	0.0872319	0.13881	0.126709	0.208948	0.102573	0.0760312	0.122575	0.122446	0.134537	0.0694461	0.0953112	0.144766	0.172977	0.0546186	0.0893685	0.137343	0.123676	0.0663885	0.204615	0.105033	0.108583	0.163054	0.146167	0.24211
251.708	0.0941435	0.144703	0.0771493	0.217325	0.101787	0.103151	0.11408	0.12333	0.15441	0.0598794	0.0791348	0.138118	0.151248	0.0744583	0.102101	0.153424	0.129968	0.0713769	0.22839	0.120532	0.115129	0.0967111	0.144214	0.271333
252.734	0.098626	0.14134	0.100627	0.239804	0.0954628	0.0701239	0.138239	0.127341	0.132469	0.098739	0.121956	0.160867	0.16654	0.0696616	0.105012	0.120625	0.158278	0.0639131	0.227073	0.122225	0.107949	0.127451	0.131591	0.238491
253.734	0.100448	0.0992345	0.0789067	0.213335	0.0629534	0.0668862	0.133196	0.127904	0.138249	0.087362	0.103239	0.161811	0.130525	0.0799099	0.110751	0.222234	0.117267	0.100085	0.193209	0.126642	0.129035	0.124969	0.24649	0.318799
254.745	0.125451	0.154671	0.10262	0.185078	0.103072	0.066398	0.151684	0.134469	0.120559	0.134528	0.0981419	0.134374	0.179612	0.089518	0.115481	0.0599716	0.125051	0.0897319	0.21546	0.0933034	0.139647	0.123709	0.195024	0.365353
255.765	0.0915635	0.167283	0.10574	0.181882	0.0879006	0.0666077	0.143059	0.123463	0.132407	0.0777277	0.121157	0.137568	0.152068	0.04702	0.121282	0.139212	0.141444	0.0739937	0.187866	0.113119	0.144596	0.11475	0.170814	0.366452
256.774	0.102766	0.129951	0.0823011	0.134183	0.094944	0.0855535	0.120289	0.111101	0.108537	0.108134	0.0909428	0.138757	0.165918	0.0697264	0.109356	0.148557	0.130479	0.0680835	0.236942	0.117883	0.121587	0.151892	0.151488	0.265864
257.794	0.113413	0.126676	0.105365	0.143496	0.0953679	0.0828941	0.0878706	0.123026	0.127873	0.160217	0.0803153	0.136872	0.12485	0.0603232	0.109743	0.160232	0.133341	0.0682649	0.18203	0.0979052	0.117582	0.0563719	0.177755	0.18367
258.805	0.100425	0.15588	0.0822996	0.201301	0.10123	0.090143	0.113282	0.106812	0.125421	0.0938108	0.121631	0.128383	0.178772	0.0635891	0.11619	0.125298	0.127958	0.0747877	0.223137	0.111076	0.137539	0.141075	0.153418	0.298083
259.824	0.121476	0.148342	0.0790591	0.31103	0.114087	0.0861428	0.116376	0.131571	0.128889	0.0770913	0.133209	0.150874	0.143132	0.0728667	0.0889813	0.172872	0.146525	0.0475772	0.201136	0.107409	0.106992	0.139611	0.175862	0.305171
260.834	0.0880387	0.131106	0.100205	0.137338	0.123386	0.0947898	0.136803	0.11669	0.139059	0.0637477	0.129377	0.126545	0.144248	0.0652025	0.0829149	0.130905	0.134249	0.0726814	0.282914	0.129451	0.165495	0.11713	0.16228	0.38992
261.844	0.0950019	0.13062	0.115394	0.188935	0.0843713	0.0870718	0.153778	0.101631	0.128034	0.10319	0.124257	0.164328	0.181363	0.0887038	0.094175	0.105854	0.113291	0.0342176	0.214018	0.102651	0.101721	0.0854348	0.20257	0.314212
262.864	0.0905551	0.127789	0.0767715	0.170621	0.0927832	0.0738088	0.1684	0.112108	0.134263	0.11761	0.120542	0.144057	0.166732	0.0672529	0.135715	0.0933126	0.130992	0.0644663	0.244514	0.109299	0.102236	0.164007	0.164846	0.310152
263.884	0.119123	0.124142	0.120453	0.220554	0.0956899	0.0741036	0.138811	0.114614	0.132721	0.109881	0.118008	0.11673	0.182728	0.0865111	0.103681	0.130198	0.140515	0.0830961	0.197664	0.109354	0.136398	0.0897756	0.204682	0.298611
264.904	0.111673	0.155067	0.0674684	0.200465	0.0788853	0.0703393	0.164055	0.11035	0.143509	0.0914539	0.0834219	0.133174	0.189356	0.0627023	0.106835	0.0948889	0.122441	0.0599085	0.279427	0.113498	0.160403	0.156313	0.226436	0.296331
265.921	0.115435	0.112658	0.0756819	0.218648	0.0795765	0.0842183	0.135138	0.103889	0.101764	0.0458204	0.139294	0.163757	0.185991	0.0941143	0.0867743	0.0940258	0.129888	0.0474013	0.230775	0.108813	0.125818	0.118077	0.087622	0.306213
266.933	0.0913611	0.158489	0.0903558	0.160002	0.0917633	0.0881469	0.128656	0.133571	0.14099	0.0712896	0.121011	0.129019	0.171756	0.0662853	0.1139	0.148606	0.120886	0.0649773	0.240299	0.125455	0.144515	0.1289	0.160884	0.370234
267.963	0.101201	0.111051	0.108581	0.252521	0.086305	0.0762005	0.128706	0.144888	0.125714	0.0701199	0.118748	0.128828	0.16647	0.0587401	0.0917729	0.142857	0.140279	0.0573616	0.192058	0.107609	0.118877	0.0915182	0.159497	0.302998
268.977	0.114958	0.109634	0.100241	0.185288	0.109519	0.0945998	0.102299	0.0845798	0.152113	0.199754	0.0942371	0.148195	0.179262	0.0732571	0.105225	0.166262	0.151457	0.100049	0.23399	0.0900414	0.188316	0.0987385	0.187408	0.218844
269.994	0.117111	0.130526	0.0725523	0.147808	0.104718	0.0753725	0.14041	0.0954383	0.08999	0.09198	0.101071	0.125815	0.171614	0.077925	0.12298	0.11246	0.139466	0.0775339	0.199187	0.0894773	0.17471	0.100896	0.241493	0.368901
271.013	0.114032	0.124327	0.072087	0.245111	0.125105	0.0601844	0.142829	0.108289	0.0891943	0.0625289	0.113482	0.138507	0.146009	0.0736253	0.118147	0.177285	0.110657	0.0751342	0.278452	0.101281	0.128922	0.105103	0.116322	0.330612
272.014	0.114423	0.132201	0.106988	0.236533	0.0775389	0.0707119	0.11451	0.119652	0.100543	0.112754	0.130075	0.134132	0.176187	0.0742156	0.077511	0.147994	0.133517	0.0600033	0.257305	0.111443	0.153817	0.0994921	0.146212	0.347833
273.034	0.113299	0.135723	0.0865164	0.197746	0.0865254	0.0790787	0.130751	0.138254	0.111328	0.0448489	0.112194	0.139752	0.186919	0.0896601	0.117405	0.130618	0.112858	0.0744502	0.248841	0.0865489	0.155546	0.116109	0.227104	0.338162
274.062	0.102472	0.117244	0.113913	0.235597	0.0825724	0.100103	0.114617	0.0895408	0.102914	0.12001	0.148394	0.154002	0.195107	0.067771	0.106992	0.136255	0.121188	0.0783645	0.226152	0.104305	0.144349	0.0702614	0.145651	0.361519
275.073	0.126157	0.122155	0.08889	0.196246	0.107726	0.0765217	0.112877	0.0998974	0.102704	0.123522	0.121389	0.106727	0.174288	0.0700334	0.104269	0.105018	0.12721	0.0550302	0.234311	0.112618	0.13537	0.0651127	0.21253	0.439269
276.093	0.110281	0.0706855	0.110455	0.151854	0.121548	0.0840597	0.138801	0.099677	0.105492	0.0726609	0.112934	0.114794	0.193658	0.063458	0.0956165	0.160563	0.12608	0.0794889	0.216712	0.116214	0.135926	0.116112	0.245796	0.295737
277.102	0.125829	0.100315	0.119325	0.215919	0.0968777	0.0898394	0.171461	0.103709	0.117325	0.0651531	0.113174	0.131889	0.203533	0.0614608	0.110983	0.125972	0.137129	0.0728025	0.239214	0.103758	0.158796	0.063974	0.202565	0.402959
278.122	0.102178	0.145481	0.104337	0.196808	0.102991	0.0880495	0.158973	0.126094	0.0989054	0.0868842	0.117457	0.148289	0.192355	0.0885892	0.134904	0.117921	0.135	0.0584386	0.236499	0.123133	0.145962	0.128764	0.217446	0.410447
279.133	0.126666	0.151576	0.119915	0.227426	0.0965919	0.0747202	0.170225	0.109019	0.0881898	0.103369	0.111288	0.137271	0.208051	0.081885	0.106065	0.105689	0.113108	0.0966628	0.271541	0.0938224	0.160605	0.165687	0.22095	0.345209
280.152	0.125502	0.102606	0.0788745	0.128826	0.11498	0.0979336	0.113607	0.104968	0.0907839	0.00458467	0.116319	0.125225	0.179618	0.0621838	0.113795	0.134478	0.133543	0.0802132	0.301321	0.108892	0.142138	0.125814	0.154142	0.470523
281.162	0.0985658	0.106227	0.0726861	0.198366	0.0874408	0.0819477	0.148046	0.137543	0.083078	0.0673782	0.121129	0.12687	0.207814	0.0656643	0.125335	0.136792	0.12	0.077779	0.248385	0.10767	0.137214	0.0706472	0.201579	0.355829
282.166	0.0974111	0.0991932	0.0877604	0.22141	0.114627	0.0868541	0.105453	0.149007	0.0909836	0.0726833	0.131203	0.108566	0.192922	0.0561567	0.108037	0.114373	0.138328	0.0781819	0.226806	0.110106	0.132308	0.100209	0.156406	0.305334
283.195	0.0925665	0.114623	0.123594	0.264265	0.0988875	0.0778966	0.129505	0.136354	0.109351	0.0791403	0.173789	0.142034	0.186988	0.0630328	0.10004	0.132241	0.127641	0.059823	0.282267	0.114168	0.139687	0.0918249	0.191826	0.35945
284.202	0.0987462	0.112864	0.104105	0.196323	0.107784	0.0837056	0.105236	0.121767	0.0979076	0.0380737	0.149813	0.112267	0.215808	0.0638186	0.119332	0.145745	0.13629	0.074498	0.252272	0.105517	0.162273	0.134322	0.205585	0.264947
285.221	0.0883972	0.142564	0.133412	0.235475	0.0970896	0.0729296	0.109073	0.12568	0.100214	0.0816901	0.16272	0.12141	0.186106	0.0544137	0.12357	0.154415	0.118165	0.0688575	0.291042	0.111542	0.149467	0.0506425	0.221998	0.378075
286.232	0.116489	0.101498	0.108231	0.124793	0.0856583	0.0925909	0.147139	0.137991	0.0885831	0.0229776	0.131605	0.137059	0.189425	0.0679413	0.126052	0.105871	0.121427	0.0832718	0.252862	0.128671	0.178517	0.110451	0.238916	0.417726
287.246	0.129708	0.0952701	0.0694412	0.155419	0.0857734	0.0864998	0.160387	0.165811	0.100148	0.0454973	0.133322	0.113055	0.192018	0.0740306	0.111499	0.200203	0.131505	0.090698	0.27254	0.118408	0.167498	0.126101	0.242956	0.365656
288.258	0.11658	0.140749	0.112064	0.229615	0.112576	0.0728487	0.108084	0.140159	0.0691684	0.0935163	0.116486	0.147323	0.221144	0.0487014	0.141569	0.154398	0.13675	0.0521348	0.24331	0.132527	0.157948	0.108723	0.185024	0.326389
289.294	0.0997767	0.142609	0.104955	0.196308	0.0936838	0.0789428	0.115399	0.149361	0.0870084	0.0804015	0.113826	0.143956	0.230804	0.0470671	0.124632	0.133345	0.159469	0.0590087	0.242894	0.123395	0.158946	0.130651	0.157817	0.239438
290.302	0.136831	0.110073	0.0925489	0.189026	0.0941715	0.0716006	0.126101	0.133117	0.108001	0.0611072	0.150248	0.15068	0.230105	0.0686368	0.123893	0.118057	0.117923	0.0905624	0.25187	0.106551	0.186347	0.150699	0.200368	0.439732
291.314	0.113199	0.115548	0.0926601	0.243172	0.0857076	0.0913371	0.146649	0.15006	0.0942059	0.0773297	0.128186	0.125762	0.211441	0.0818497	0.135215	0.1354	0.139519	0.0666086	0.282065	0.105279	0.115901	0.0880218	0.189892	0.310422
292.334	0.110772	0.133703	0.0917954	0.170798	0.100566	0.0847019	0.132522	0.111534	0.0842115	0.0576614	0.119174	0.155929	0.202182	0.064939	0.111301	0.120394	0.159958	0.073483	0.265597	0.104018	0.178611	0.134678	0.167754	0.211985
293.345	0.142048	0.116068	0.0958399	0.170328	0.0950909	0.085269	0.128217	0.113779	0.100662	0.071163	0.125745	0.145843	0.205988	0.052307	0.125883	0.177875	0.135112	0.0552602	0.26006	0.0981316	0.149539	0.117898	0.189088	0.307695
294.351	0.0909186	0.129538	0.112912	0.122179	0.0931955	0.105751	0.162548	0.111352	0.113523	0.087661	0.138344	0.118	0.221431	0.073999	0.104706	0.0793476	0.141357	0.0757368	0.246401	0.127293	0.145039	0.116332	0.255115	0.323671
295.371	0.111262	0.1022	0.105061	0.163779	0.0919532	0.0865682	0.166883	0.108201	0.114931	0.115335	0.120501	0.181022	0.209949	0.0567195	0.121086	0.115578	0.151456	0.0674241	0.277205	0.117443	0.171151	0.0854477	0.248808	0.349133
296.385	0.123321	0.106373	0.0968767	0.0891847	0.0853084	0.0708926	0.125958	0.119291	0.111636	0.09308	0.122826	0.184095	0.197217	0.0637008	0.103811	0.144712	0.136895	0.0764984	0.290972	0.111325	0.145574	0.140616	0.217935	0.447491
297.405	0.130299	0.103806	0.105369	0.119988	0.103347	0.106409	0.135376	0.0908704	0.093256	0.0988314	0.12943	0.183185	0.211251	0.0713654	0.0856118	0.106068	0.157474	0.0742326	0.282678	0.111965	0.158955	0.127295	0.182712	0.282631
298.411	0.119591	0.119465	0.0664997	0.202041	0.0994579	0.0944685	0.136079	0.0963448	0.126173	0.0624327	0.166367	0.155897	0.20939	0.0649258	0.089577	0.130687	0.148391	0.073395	0.320019	0.102676	0.128635	0.070507	0.19213	0.326839
299.422	0.11289	0.0804181	0.103623	0.139438	0.0935627	0.100251	0.144209	0.148015	0.110843	0.0657799	0.134145	0.18363	0.221976	0.0782378	0.103074	0.124906	0.169884	0.0712439	0.264642	0.119238	0.198097	0.0598609	0.200147	0.401824
300.444	0.0916443	0.112985	0.116335	0.123349	0.0891319	0.0869099	0.14022	0.104488	0.0935251	0.0924383	0.148985	0.160964	0.229371	0.0624103	0.115438	0.210661	0.148294	0.0780008	0.272571	0.0973885	0.148979	0.0625222	0.197214	0.440415
301.461	0.113866	0.136259	0.0864163	0.133071	0.0709917	0.0819911	0.15014	0.139341	0.0817896	0.0649609	0.147182	0.125094	0.206713	0.0826522	0.0874136	0.143973	0.152435	0.0609971	0.332543	0.130985	0.138134	0.0887762	0.279158	0.550904
302.467	0.104486	0.108625	0.0895061	0.194559	0.0745236	0.103614	0.144337	0.117475	0.0983616	0.0333052	0.116737	0.127172	0.189317	0.0728789	0.0751293	0.142402	0.143031	0.0687053	0.306512	0.122948	0.172627	0.0979883	0.215186	0.304399
303.478	0.124862	0.121901	0.125388	0.188274	0.118856	0.0906103	0.0977892	0.123164	0.0993853	0.136599	0.124432	0.133937	0.212597	0.0614116	0.0985531	0.129459	0.157553	0.0820058	0.323109	0.119522	0.171199	0.0449081	0.241548	0.324875

## Sheet: 6I_homo
time	13a.txt	13b.txt	13c.txt	18a.txt	18b.txt	18c.txt	19a.txt	19b.txt	19c.txt	1a.txt	1b.txt	1c.txt	1d.txt	1e.txt	1f.txt	1g.txt	1h.txt	1i.txt	1j.txt	1k.txt	1l.txt	2a.txt	2b.txt	2c.txt	2d.txt	2e.txt	2f.txt	2g.txt	2h.txt	2i.txt	2j.txt	3a.txt	3b.txt	3c.txt	3d.txt	3e.txt	3f.txt	3g.txt	3h.txt	3i.txt	3j.txt
0	0	0	0	0	0	0	0	0	0	0	0	0	0	0	0	0	0	0	0	0	0	0	0	0	0	0	0	0	0	0	0	0	0	0	0	0	0	0	0	0	0
1.022	0.00875608	0.00234625	-0.00433966	0.0350303	-0.00020739	-0.0110545	0.0369982	0.025338	0.00742899	0.00984323	-0.00136631	0.000376124	0.0348195	0.0230758	0.0328437	-0.00364208	-0.0291175	0.0225654	-0.0175708	-0.0123304	-0.0193221	-0.0030577	-0.0823986	-0.10816	-0.0552571	0.0163656	-0.0552571	-0.0359379	-0.0366664	0.00753934	-0.105138	0.00866411	0.0178633	0.0060447	-0.0157822	-0.0278275	-0.0157909	-0.028426	0.037137	0.00104816	0.00855044
2.036	0.0255287	-0.0173505	0.00120305	-0.00985688	0.00938726	-0.00474996	0.0171963	0.019734	-0.00147595	0.0168028	0.0130438	0.00278334	0.0304331	0.0343568	0.00556344	0.00842484	0.000527756	0.0311855	-0.0237187	-0.0110291	-0.00875419	0.0235808	0.00409358	0.00805149	-0.0146145	0.028281	-0.0146145	-0.0167531	-0.0181351	0.0519402	-0.0553009	0.00791761	0.0112192	-0.0265387	-0.0117926	-0.00103225	0.00438074	-0.0283588	0.0572934	0.000883648	0.00330808
3.053	0.0254298	0.00977887	0.0177802	0.0642478	0.0232714	0.0253985	-0.00727811	-0.00229779	0.00223636	-0.00384641	0.0158292	-0.00988569	0.0294484	0.0249141	0.0253212	4.28693e-06	0.00930969	0.0150876	-0.0153377	-0.0222937	-0.0467364	0.0144023	-0.0892108	-0.041684	-0.0407251	0.0603182	-0.0407251	-0.0231265	-0.0225476	0.014503	-0.0905685	0.0181259	0.0235758	0.0125573	-0.00813257	0.00351825	0.0210621	0.016885	0.0446963	0.0277402	-0.0261681
4.053	-0.00083803	0.024092	0.0244804	0.0873909	0.0123218	0.00703914	-0.0175382	0.00662504	0.0127842	0.0247876	0.0301269	0.0101032	0.0192799	0.00959242	0.017126	0.0133721	0.0142785	0.0137005	-0.01819	-0.00728745	0.00437591	0.0129054	0.0204714	0.00190585	-0.0974605	0.0486905	-0.0974605	-0.0254272	-0.0195569	0.042932	-0.0741229	0.0117224	0.021469	0.00163048	0.0128606	0.0354305	0.022094	-0.0113771	0.0457459	0.00179593	0.00280335
5.082	-0.00449456	-0.0132085	0.00504681	0.0247752	-0.000676972	0.0128292	0.0235453	-0.0175447	-0.00100341	0.0443205	0.027485	0.0178947	0.036104	0.00483012	0.00195201	0.0250545	0.0236332	0.0407548	-0.00764573	-0.00649433	-0.00922449	0.022829	-0.0534029	-0.0700758	-0.0209564	0.0636407	-0.0209564	-0.0240626	-0.0266863	0.0603934	-0.0548741	0.0130554	0.0272279	0.0104835	0.0137817	0.000607677	-0.000911119	-0.0164206	0.0867611	0.0502798	0.0216674
6.099	0.0281712	0.0082971	0.0241045	0.0345536	0.0168142	0.0220097	0.00649984	0.0074642	0.0118018	0.0407376	0.0129082	0.00542292	0.030547	0.0349377	0.0282626	0.029754	0.0377086	0.031639	-0.00795639	0.00125686	0.00751201	-0.014701	-0.0667653	-0.120159	-0.125652	-0.0129056	-0.125652	-0.00606527	-0.00388371	0.050368	-0.0726295	-0.0140902	0.0283858	0.0276976	-0.01498	0.0160611	-0.00215859	-0.00600784	0.0264189	-0.000286712	0.0260554
7.116	-0.0182371	0.000278066	0.0344555	0.0307717	0.00257563	0.0244736	0.0256582	0.0166386	0.012146	0.0430525	0.0411356	0.0199078	0.0102838	0.04359	0.0379004	0.0195908	0.0289441	0.0425303	-0.0135138	-0.00657085	0.00404234	0.00716016	-0.0123231	-0.0572374	-0.0458091	0.0711914	-0.0458091	-0.00883854	-0.0245333	0.0387999	-0.0615976	0.0210175	0.011774	0.0194776	0.0072988	-0.00114984	0.015608	-0.0150956	0.043804	-0.00864394	0.0213448
8.135	0.0165002	-0.00737871	0.0155444	0.0382024	0.0137711	0.0198367	0.00960005	0.0124868	0.0340649	0.0259131	0.0375641	0.0203261	0.0241592	-0.00922008	0.00852251	0.0101674	0.0159366	0.0363694	0.00266661	-0.0178341	0.00669317	0.0135046	-0.0090739	0.0316798	-0.0674958	0.0583238	-0.0674958	0.0234546	-0.00321719	0.0533382	-0.0545929	0.00830202	0.0308145	0.00768504	-0.0129622	-0.00301739	-0.0105907	-0.0163223	0.0283336	0.00954054	0.00649442
9.142	0.0200228	0.00706257	0.0210773	0.0333057	0.0316317	-0.0102419	0.0431429	0.0572094	0.0118491	0.04239	0.0206486	0.023182	0.0218745	0.0021888	0.0233408	0.0167208	0.0162801	0.0258006	-0.0185351	-0.00791681	-0.0319655	0.040436	-0.0247334	0.0101895	0.0621298	0.0908264	0.0621298	-0.0521827	-0.0158123	0.0481953	-0.00560882	0.0296068	0.0389543	0.0291321	0.0110935	0.036969	0.017509	0.0092022	0.0445127	-0.00528883	0.026953
10.161	0.00885195	0.00544625	0.0248082	0.0527567	0.0445056	0.00291354	0.0158215	0.0306446	0.019495	0.0527749	0.0417791	0.0161255	0.0214795	0.0184603	0.0393096	0.0174232	0.00080192	0.0315891	-0.0188694	-0.0181911	-0.00481888	-0.0038205	-0.0346439	-0.0574042	-0.0538727	0.172833	-0.0538727	-0.0101915	0.0111526	0.0801603	-0.0382111	0.0258238	0.0132893	0.0569965	0.0106656	0.00515198	-0.00471227	-0.0113394	-0.0255945	0.00111927	-0.0240916
11.192	-0.011443	0.00830717	0.0250382	0.0260416	0.0200194	0.00805655	-0.00375648	0.00800069	0.0104917	0.0592201	0.05869	0.0367724	0.0306038	0.0519694	0.00729819	-0.00395906	0.0358713	0.0496464	0.00914102	-0.0151621	0.00342862	0.0302728	-0.0470587	-0.107962	-0.0195735	0.066199	-0.0195735	-0.0186788	-0.0199413	0.0449586	-0.0742338	0.00393999	0.0238732	-0.0114536	0.015918	0.0214479	0.00313222	0.0105047	0.0215009	-0.0208232	-0.0214141
12.22	0.0178607	0.0146245	0.0561968	-0.00685506	0.0168526	0.00987967	0.0319965	0.063185	0.00418035	0.0526834	0.036684	0.0403734	0.0317172	0.0263462	0.032669	0.0418897	0.0231727	0.0426825	-0.0100293	-0.0117779	-0.0162339	0.0220254	0.00717501	-0.062491	-0.0488672	0.0938682	-0.0488672	0.0113358	-0.00799194	0.0661399	-0.0618494	0.0117981	0.00895388	-0.00755859	0.0138929	0.00275999	0.00937123	-0.0307856	0.0117524	0.00997365	0.0159549
13.221	0.0115875	0.00990055	0.0458013	0.0448999	0.00837507	0.0185137	0.0265552	0.0124271	0.0271579	0.0755439	0.0456662	0.0323826	0.0418551	0.0273955	0.0225024	0.00984325	0.0239489	0.0443285	0.0105517	-0.0136417	0.0160085	0.0249325	-0.026098	-0.00998162	-0.00426419	0.0827382	-0.00426419	-0.000353069	-0.0119832	0.0541207	-0.0256842	0.0154604	0.0264442	0.00653525	0.0105342	-0.0278521	-0.00288924	-0.0168786	0.0816113	0.0310577	0.00763429
14.232	0.0013551	0.0134964	0.0239817	0.0299591	0.00460475	0.0356753	0.0350414	-0.00141922	0.0173734	0.0398955	0.0416239	0.0193237	0.0238361	0.0356536	0.0122759	-0.00170822	0.0051986	0.0204746	0.00773491	-0.0123984	-0.0130601	-0.00695241	-0.0253133	-0.0323113	0.00701856	0.10088	0.00701856	0.000462715	-0.0215186	0.0377212	-0.0860265	0.0123157	0.0192552	0.0188567	0.00470953	0.0320999	0.0328569	-0.00101029	0.0620285	0.0423238	0.0259995
15.265	0.0220772	9.96215e-05	0.054391	0.0360996	0.0194493	0.0176137	0.00287216	-0.0313108	0.0147228	0.0612796	0.050704	0.026056	0.00481704	0.0665198	0.0472702	0.0209703	0.0355551	0.045096	-0.0401969	-0.0415085	-0.0446608	0.0971259	-0.0166801	-0.0269389	-0.0053618	0.0718219	-0.0053618	0.0317724	-0.00438101	0.0564816	-0.0105947	0.00639281	0.0263481	0.0248302	0.015403	-0.0111284	-0.000881326	0.00448394	0.0225796	0.0119609	0.0279151
16.28	0.0023155	0.0129701	0.0407716	0.0262455	0.0255288	0.0427838	0.00273173	0.0117873	0.0129498	0.0617237	0.0416505	0.0217732	0.0395549	0.0534233	0.0245739	0.0224923	0.0372403	0.0434014	0.0346497	0.0150511	0.00725053	0.0249141	-0.0415256	-0.041168	0.00249576	0.103858	0.00249576	0.030009	0.0181054	0.0687093	0.00468403	-0.0227108	0.0246441	0.0289281	0.0375817	0.0192018	0.0156584	-0.00289402	0.0346084	0.00734733	0.0106057
17.291	0.0326601	0.0202922	0.0361361	0.0648532	0.0305864	0.0503421	0.0099911	0.0326876	0.0197679	0.0256272	0.028868	0.0290577	0.0475841	0.0718752	0.0491361	0.00528398	0.0336822	0.0147152	-0.00210699	-0.00303667	-0.0345641	-0.0123023	-0.0250504	-0.0851152	-0.0759573	0.00642226	-0.0759573	0.0184594	0.00392905	0.0485328	-0.0206976	0.00487409	0.044961	0.0196496	0.0032518	-0.00440978	-0.00552271	-0.0241573	0.0504047	0.0185531	0.00961711
18.305	0.0395562	0.0319648	0.0441048	0.0555266	0.040763	0.0374081	0.0360722	0.0123911	0.0358625	0.0753083	0.0856672	0.0498727	0.0428527	0.094005	0.0748187	0.00796243	0.0121984	0.00861388	-0.0155303	-0.00417847	0.0040847	0.0133943	0.0293842	-0.0219569	-0.0316714	0.0747683	-0.0316714	0.010296	0.0246926	0.0955792	-0.00832013	0.00176954	0.044287	0.0496687	0.043787	0.00468927	0.0195135	-0.00548942	0.0580054	0.0197864	0.0433831
19.333	0.0156048	0.0335908	0.059883	0.0567606	0.0189814	0.00852716	0.051234	0.000429159	0.0267092	0.0547904	0.0665469	0.0626989	0.0233721	0.067057	0.0679838	0.0330011	0.0211697	0.0281421	0.0419005	0.00478785	-0.0132635	-0.00935197	-0.0286817	-0.0389065	-0.0759068	0.0253745	-0.0759068	-0.0137157	0.00452134	0.0623553	-0.0122402	0.0311398	0.0270248	0.0290463	0.0425273	-0.000475799	0.0148761	-0.0194666	0.0371453	0.000980462	0.037046
20.961	-0.0101567	0.0254741	0.0342348	-0.00285549	0.0032832	0.0310697	0.000265662	0.0422776	0.0272585	0.064828	0.0694182	0.0429704	0.0427477	0.0648218	0.0449262	0.0198418	0.0618967	0.0645199	0.00304916	-0.00153006	-0.0172472	0.0574211	-0.0287984	-0.0924456	-0.0222064	0.0853436	-0.0222064	-0.0213251	0.00137464	0.0700836	-0.00486999	0.030776	0.0144268	0.0244349	0.00402554	0.0017699	0.00270136	-0.0184247	0.0245248	-0.0170493	0.00480175
21.964	0.0324269	0.061844	0.0253924	-0.00272024	0.0306825	0.0544859	0.0190528	0.0443955	0.010174	0.0724589	0.0597323	0.0468467	0.0445866	0.0707991	0.0677231	0.0166389	0.0309212	0.0348515	-0.037797	-0.0167453	0.00255822	-0.00111657	-0.0778151	-0.0837767	-0.0603329	0.0538092	-0.0603329	-0.0199019	-0.00560203	0.0694615	-0.0307138	0.0301364	0.0419658	-0.0351009	0.0274046	0.0797547	0.00469	-0.00610595	0.0421492	0.04986	-0.00192223
22.993	0.0541593	0.0317801	0.0416646	0.0233656	0.0274127	0.0553477	0.00634931	0.0717978	0.027032	0.0566082	0.0452327	0.0330582	0.0353739	0.0791724	0.0714563	0.0651277	0.0696472	0.0550696	0.0301762	-0.00913432	0.00403261	-0.0265629	-0.0253744	-0.0684084	-0.06961	0.0551094	-0.06961	-0.00477604	-0.00476995	0.0549851	-0.0615183	0.00775597	0.0264757	0.00367369	0.0190553	-0.0118274	-0.000347956	-0.022623	0.0756819	0.0569964	0.000556263
24.004	-0.00548451	0.0297601	0.0253867	0.0583402	0.0371966	0.013664	0.022825	0.025069	0.0059452	0.093816	0.0410091	0.066545	0.0458467	0.0529578	0.0610716	0.0164527	0.0568391	0.0667026	0.0246847	0.0118172	0.0224142	0.0362009	-0.0738978	-0.0327372	-0.030585	0.077271	-0.030585	0.0363961	0.0342201	0.0928837	0.0180755	-0.0320479	0.0424732	0.0223793	0.0321261	0.00148616	-0.000645283	-0.0140658	0.0799334	0.0446387	0.0365675
25.032	0.0219664	0.0154332	0.045743	0.0381101	0.0626528	0.0154161	0.0294138	0.0644262	0.0235369	0.063629	0.0506765	0.0256956	0.0323555	0.0686805	0.0308591	0.0248658	0.0397291	0.0512499	0.0474175	0.0433985	0.0359419	0.0237519	-0.0335352	-0.104772	-0.0176198	0.145761	-0.0176198	0.0130285	0.00827642	0.0681846	-0.0395571	0.0594925	0.0494514	0.0443182	0.0568467	0.000963789	0.034122	0.00521833	0.0100746	0.0378457	0.00101743
26.033	0.0169499	0.0191608	0.03317	0.0464325	0.0542251	0.0401389	0.013481	0.0522218	0.0417134	0.0554153	0.0505638	0.0399462	0.0269957	0.0802682	0.0583944	0.0277312	0.0529737	0.0395238	0.0273123	0.0204863	0.037516	0.0320371	-0.0574785	0.0336514	-0.0459033	0.187802	-0.0459033	0.0132084	0.0224145	0.0673655	0.00715837	-0.0130058	0.0428429	-0.0185481	0.00453343	-0.0242905	0.00364961	-0.00297466	0.0424707	0.0217132	0.0234705
27.066	0.0345598	0.0301306	0.0610308	0.0693186	0.0231512	0.0323587	-0.00457118	0.000261875	0.0114367	0.0689552	0.0551702	0.0458748	0.0532156	0.0504376	0.0543272	0.0351324	0.0390501	0.0469088	0.0157366	0.0112856	0.0191915	-0.0292697	-0.0463276	-0.0476383	-0.0208045	0.0962387	-0.0208045	0.04353	0.0328297	0.0843828	0.0169519	0.0630444	0.0409936	0.062151	0.0304314	0.0172338	0.0234429	-0.0038511	0.0493944	-0.00596294	0.0195069
28.072	0.0167791	0.0346654	0.0442836	0.0721192	0.00995885	0.0385243	0.00848155	0.0202541	0.0313818	0.0516351	0.0360641	0.0193407	0.0462933	0.0666342	0.0676632	0.0237869	0.046182	0.042613	0.0242826	-0.00646048	0.0523123	0.0145242	0.0164788	-0.0109197	-0.0462409	0.0814635	-0.0462409	0.032114	0.0162471	0.100755	-0.0393105	0.0130816	0.0322429	0.0304981	-0.0221797	-0.0123544	-0.0253231	-0.0223074	0.0899518	0.0205761	0.0220162
29.102	0.033504	0.0192501	0.065711	0.0432442	0.0165636	0.0182861	0.0400727	0.0593425	0.0255092	0.0901516	0.0721618	0.0411368	0.0402091	0.0955673	0.0589486	0.0505348	0.0115409	0.0400542	0.0317929	0.000738857	0.0125863	0.0370301	-0.012957	-0.0475308	-0.0803761	0.106813	-0.0803761	0.0314255	0.0217214	0.099129	0.00182819	0.0157014	0.0373623	0.0704824	0.0251643	0.0242844	0.0212213	-0.0100403	0.0786541	0.0444884	0.0294331
30.125	0.0325641	0.043344	0.0546022	0.0728194	0.0368219	0.0215053	0.0447992	0.0716857	0.0503664	0.0981054	0.0819387	0.0653496	0.0335797	0.0613782	0.0752936	0.035527	0.0427773	0.0541456	-0.0068488	-0.008169	-0.00575545	0.0506168	0.0419699	-0.049826	0.0157377	0.15575	0.0157377	0.0319793	0.0158689	0.111931	-0.0456673	0.0391271	0.0285278	0.00365315	0.0205952	0.00982465	0.0420765	-0.0144397	0.0928631	0.0402598	0.000469221
31.139	0.0457776	0.0353727	0.0449432	0.0376842	0.0364214	0.0204741	0.0476887	0.0779902	0.0127212	0.0547067	0.0218654	0.0435149	0.046027	0.0640964	0.0649516	0.0357522	0.0785567	0.0480704	0.00837407	-0.00125449	0.00911666	0.00310135	0.00525311	-0.0657761	-0.00408939	0.123601	-0.00408939	0.0415763	-0.0125666	0.0886487	0.0121275	0.0524474	0.0382485	0.0236113	0.0549512	0.0486916	0.0298552	0.00678978	0.0312488	0.0249461	0.0440755
32.148	0.0443889	0.0238288	0.0468391	0.0152698	0.0258294	0.0377582	-0.0186515	0.0171245	0.0274364	0.0818151	0.103816	0.0615235	0.0577249	0.077546	0.0593794	0.0424639	0.0257385	0.0664929	0.0427431	0.0207807	0.0217752	0.000272779	0.0139555	-0.0336108	-0.0243677	0.104586	-0.0243677	0.0556835	0.0416964	0.0915273	-0.0316932	0.0326982	0.048779	0.0629614	0.0289975	0.0484152	0.02335	0.00231094	0.0596047	0.0163164	0.0312043
33.182	0.0209311	0.0394281	0.0535331	0.0977401	0.0304872	0.0539224	0.022946	0.0671113	0.0215209	0.0964199	0.102261	0.0769267	0.0472287	0.0666997	0.0579188	0.0355173	0.0561256	0.033767	0.011388	0.00609276	0.025765	0.033787	-0.0226254	-0.00312936	0.00964519	0.155254	0.00964519	0.0875143	0.0274913	0.0899353	0.104365	0.0173105	0.0452187	0.0401841	0.0369901	0.034599	0.0219521	0.0104525	0.074325	0.01927	-0.000427584
34.179	0.0127609	0.0409548	0.0645634	0.144325	0.0204289	0.0467732	0.0210251	0.00185712	0.0468232	0.0831788	0.0934807	0.0487963	0.0387169	0.0413395	0.0307934	0.0381238	0.0502862	0.0490589	0.0477258	0.010836	0.0415898	0.0664319	0.0539097	-0.00869131	0.0125141	0.129405	0.0125141	0.0236656	0.0274655	0.0948612	-0.00971855	0.0448457	0.0628078	0.0919204	0.0150199	-0.0127163	-0.00642122	0.000924821	0.043368	0.0183324	-0.0111503
35.199	0.0597596	0.00766536	0.0547921	0.0525484	0.0414634	0.0134315	0.030868	0.0834756	0.031126	0.105431	0.0424193	0.0384047	0.041649	0.0504335	0.0325648	0.0645441	0.053318	0.0506583	0.0568872	0.00663283	0.0348787	0.0548233	0.001586	-0.0289818	0.0537796	0.131774	0.0537796	0.0864091	0.0389149	0.109384	0.0231742	0.0146994	0.0473289	0.0336677	0.0360232	-0.0145138	0.00295507	-0.0126889	0.0430351	0.0182774	0.0207065
36.218	0.0127833	0.0374448	0.0555634	0.0633821	0.0464993	0.0468816	0.0667466	0.0518698	0.0420062	0.0964	0.0920833	0.0436755	0.0650873	0.0946787	0.0676955	0.0499343	0.043821	0.0607482	0.0287698	0.0120775	0.0504907	0.00983847	-0.0015571	-0.0452358	-0.0549847	0.15657	-0.0549847	0.0276075	0.0410392	0.0865555	0.0151638	0.0233238	0.0327721	0.0257338	0.0257302	0.0116925	0.0363229	-0.00947307	0.052689	0.0242991	0.017076
37.241	0.0463921	0.054229	0.0459366	0.0810042	0.0222069	0.0116562	0.0326737	0.0874249	0.0537487	0.07652	0.0753007	0.0460383	0.0580173	0.0950002	0.0522873	0.0491095	0.0317599	0.0349136	0.00234489	0.00664116	0.0345517	0.0582078	-0.00765057	-0.0449227	-0.0242361	0.0861309	-0.0242361	0.0361322	0.017299	0.0995397	0.0190981	0.033833	0.0298585	0.0192929	0.0163167	0.0363255	0.0083611	0.000812726	0.129384	0.0376234	0.00908533
38.27	0.0677436	0.0408925	0.0722749	0.0731942	0.0280439	0.0312801	0.0256136	0.0779207	0.0533737	0.0687991	0.0684897	0.0321111	0.0568934	0.064805	0.0756159	0.0642124	0.0559126	0.0465802	0.04752	-0.00162644	0.0648971	0.0327708	0.0354751	-0.0322597	0.0368056	0.118386	0.0368056	0.0802572	0.0293629	0.073592	0.00475826	0.0383824	0.053869	0.0298983	-0.0058882	0.00989912	0.030576	0.00285078	0.0614395	0.000461623	-0.0223386
39.29	0.0407011	0.0376202	0.0798009	0.0426513	0.0256179	0.0360881	0.0493827	0.0711673	0.0294433	0.106708	0.0864688	0.0606497	0.0533861	0.0715947	0.047509	0.0673022	0.0586285	0.0863218	-0.0130683	-0.0101696	0.0330333	0.035909	-0.0399781	-0.136296	-0.050345	0.0956447	-0.050345	0.06772	0.0333477	0.0835412	-0.000130119	0.0406043	0.0666828	0.0467908	0.049108	0.014965	0.0145246	-0.000440799	0.131827	0.0524634	-0.00633967
40.3	0.01632	0.0608661	0.0380372	0.0322998	0.0291476	0.0347727	0.0297823	0.0842324	0.0319189	0.0926452	0.074499	0.0643405	0.0378362	0.0970387	0.0691529	0.0637095	0.0712432	0.044662	0.0424529	0.0178866	0.0180612	0.0879522	-0.00301887	0.0644776	-0.00492602	0.0476406	-0.00492602	0.0148301	0.0181138	0.062303	-0.0564012	0.0521585	0.0446497	0.0276795	0.0243108	-0.00172341	-0.0173289	-0.00457037	0.0737504	0.030979	0.0230446
41.329	0.0396675	0.0414805	0.0770481	0.0547758	0.0234962	0.0623683	0.0440309	0.0846158	0.033274	0.083801	0.0913886	0.0542231	0.0254719	0.0753989	0.0736469	0.0600103	0.0515966	0.064061	0.0108497	0.00803039	0.0324461	0.0329074	-0.0381875	-0.0768086	0.0150316	0.0789142	0.0150316	0.028036	-0.00167507	0.0796165	-0.0118467	0.00975014	0.0337197	0.00394717	0.0195814	0.0384133	0.0156243	-0.0158964	0.0751722	0.0517201	0.018453
42.346	0.030101	0.0382802	0.0485822	0.0298639	0.0395071	0.0577259	0.0459286	0.0705738	0.0363315	0.100369	0.069728	0.060806	0.0810059	0.0280346	0.0774622	0.0501725	0.0721288	0.0556847	0.0404125	0.00457298	0.029894	0.0657236	0.0607962	-0.0954046	0.00679859	0.148766	0.00679859	0.0216601	-0.00251498	0.0723678	0.0205643	0.0257933	0.039058	0.024899	0.0058316	-0.0197171	0.00361788	-0.0159253	0.117215	0.0898904	0.0368447
43.357	0.0437394	0.0373566	0.0689814	0.0421164	0.038106	0.0340636	0.0546284	0.0620302	0.0476088	0.102266	0.101801	0.0522646	0.0659054	0.0588381	0.0346443	0.0515458	0.0638456	0.0511678	0.0414744	0.0171442	0.0630824	0.0285268	0.0117249	-0.00812431	-0.0130861	0.0834795	-0.0130861	0.0263339	0.0174761	0.095648	0.068127	0.0346923	0.0343617	0.0482483	0.0275672	0.0148663	0.0137719	-0.0109173	0.103795	0.0827534	0.0364402
44.366	0.0587687	0.0518958	0.0548183	0.0685603	0.0762294	0.0236685	0.070591	0.0350919	0.0105237	0.112479	0.0966286	0.0894154	0.0357413	0.0720281	0.0468068	0.0446724	0.0535604	0.0527624	0.0242951	0.0042059	0.0370762	0.0570676	0.0353971	-0.0372561	-0.0223784	0.104468	-0.0223784	0.0377964	0.054971	0.0690295	0.043775	0.0230551	0.0463596	0.0217432	-0.000760218	0.00488256	-0.0150961	-0.000345878	0.107047	0.057897	0.0207438
45.396	0.0492166	0.0565558	0.0560665	0.0294645	0.0549375	0.0394692	0.0135216	0.0510313	0.0288753	0.112505	0.079643	0.0388198	0.0469479	0.0506556	0.0705503	0.0456364	0.0533073	0.0607844	0.0180218	0.00343735	0.0383719	0.0365884	-0.0149716	-0.0776387	-0.0424058	0.177057	-0.0424058	0.0374103	0.0408009	0.104881	0.00545845	0.0354808	0.0595628	0.041443	0.0264492	0.0468091	0.0162363	0.00598116	0.125702	0.0643835	0.0139229
46.416	0.0348147	0.055343	0.0419909	0.0461746	0.0277556	0.0193065	0.0394539	0.0615599	0.0404906	0.0952464	0.0688702	0.0409328	0.0324119	0.101071	0.073607	0.0406704	0.0575091	0.0316361	0.0335581	0.0196591	0.0421961	0.0673577	0.0712556	0.0562004	0.00980038	0.113683	0.00980038	0.0510388	0.0614629	0.127519	0.0416555	0.0349645	0.0549165	0.0673897	0.0356106	0.00846155	-0.00218843	-0.0149317	0.0965267	0.0185661	0.0166792
47.436	0.00176397	0.056859	0.0511199	0.0815465	0.0510228	0.0340019	0.0798467	0.10241	0.0350113	0.074779	0.0718667	0.0433244	0.0447661	0.121621	0.0849876	0.0288028	0.0612362	0.0659528	0.0526513	0.012563	0.0797618	0.0580892	0.0249427	-0.0123037	-0.118247	0.103794	-0.118247	0.0370513	0.0138738	0.109974	0.0190414	0.0255451	0.0344563	0.01112	0.0205414	0.0367835	0.0227933	-0.000730483	0.112758	0.0509975	0.0337672
48.445	0.0268999	0.0533867	0.0534022	0.0461386	0.0677619	0.020678	0.0600938	0.0461028	0.0395838	0.100296	0.127638	0.0306409	0.0492395	0.0751672	0.0562401	0.0530436	0.0499484	0.0634419	0.0483132	0.00656896	0.0229267	0.0880099	0.0362073	0.0260719	-0.0119606	0.107664	-0.0119606	0.0602245	0.0380482	0.125778	0.00167799	0.0539125	0.0715068	0.0049823	0.0232987	0.0378318	0.00343076	-0.0228644	0.0694075	-0.00388076	0.0215726
49.484	0.0259856	0.0423222	0.0646692	0.0222852	0.057491	0.0442211	0.0445001	0.119896	0.0321119	0.153308	0.0885254	0.0476989	0.0429761	0.0680135	0.0787537	0.0720186	0.0605516	0.0519899	0.04345	0.0240907	0.0240878	0.0445019	0.01523	0.0117856	0.00105912	0.141885	0.00105912	0.00239256	0.0348281	0.0904187	-0.0294843	0.0546111	0.0567109	0.0508284	0.0189381	-0.0150515	-0.0129727	-0.0170469	0.104	0.027051	0.0235661
50.485	0.0375734	0.058751	0.0653668	0.0656943	0.0557333	0.0103074	0.0581274	0.0328274	0.0423501	0.112654	0.0543312	0.0331702	0.0676921	0.0741714	0.0651602	0.0529459	0.0762337	0.0691343	0.10036	0.00914647	0.0639096	0.0267545	0.0217612	0.000424614	-0.00349642	0.137084	-0.00349642	0.0239181	0.0266245	0.0763847	-0.0101091	0.0360234	0.0550717	0.0583786	0.036696	0.0403624	0.0173664	0.00801427	0.0470415	0.00120655	-0.00341719
51.495	0.0300546	0.0490351	0.0771716	0.0215429	0.0722349	0.0307676	0.058532	0.0574188	0.0525049	0.122934	0.0790312	0.032051	0.0302444	0.0847559	0.0688429	0.0556916	0.0589207	0.0480951	0.0292579	-0.00323646	0.0380154	0.0403469	-0.00387456	-0.03175	0.0511616	0.170393	0.0511616	0.0269648	0.0176367	0.09103	0.00276046	0.0229458	0.0556521	0.0296102	0.0159573	0.0294282	0.0376484	0.0128086	0.0622841	-0.00275292	0.0265916
52.518	0.0458698	0.0486356	0.072535	0.0523477	0.0397283	0.0333721	0.0424661	0.0613827	0.0414685	0.139187	0.0903459	0.0525931	0.0672332	0.088943	0.0864897	0.0667699	0.102903	0.0884714	0.0626915	0.00726943	0.0826394	0.0392251	-0.002563	0.0576871	-0.023536	0.140074	-0.023536	0.00930118	0.0233175	0.109721	-0.0023603	0.0344788	0.0719003	0.0481039	0.0328585	0.0423468	0.066857	-0.00286192	0.0208776	0.0186354	-7.70283e-05
53.526	0.0361909	0.0620581	0.0681052	0.0471895	0.0454308	0.0686708	0.0878914	0.0714001	0.0386582	0.0970326	0.0813182	0.0380299	0.0665159	0.139019	0.0916886	0.056877	0.0852578	0.0759277	0.0527447	-0.0101745	-0.00153214	0.0799659	0.0102132	-0.0148917	-0.0110997	0.11596	-0.0110997	0.0636928	0.0547387	0.106756	0.100144	0.0376096	0.0735383	0.0355253	0.0319849	0.0274701	0.0283254	0.0024306	0.070738	0.0428416	0.00393189
54.546	0.0161989	0.077699	0.0830421	0.02214	0.0753594	0.0392872	0.0815135	0.169586	0.0467001	0.122341	0.119018	0.0480705	0.0582591	0.0775214	0.0852211	0.0432302	0.00392822	0.0574233	0.0869802	0.0202889	0.0992527	0.0774991	0.0845629	0.134887	-0.00957302	0.105503	-0.00957302	0.0367034	0.0162538	0.126936	0.0377693	0.058224	0.0515	0.0637823	0.0331118	0.0663421	0.0299518	0.0102441	0.108637	0.0375513	0.0228248
55.555	0.0357875	0.0654646	0.0799354	0.0673718	0.0550858	0.0191706	0.118499	0.103917	0.0352751	0.148476	0.0938039	0.0673513	0.0419741	0.0489203	0.0716124	0.0615494	0.0742337	0.0477659	0.0762132	0.0119179	0.0546529	0.100404	0.0640144	0.0476848	-0.0255443	0.243655	-0.0255443	0.100686	0.0273611	0.0918537	0.0726929	0.0162976	0.0408538	0.0450855	0.0258515	0.021262	0.0345273	-0.00632876	0.112768	0.0248071	0.0348537
56.566	0.0518283	0.0623262	0.0781368	0.0591703	0.0451759	0.0441235	0.0850812	0.127779	0.0539869	0.108962	0.108493	0.0296307	0.0498808	0.0692783	0.0721834	0.0430543	0.0653885	0.060858	0.0577068	0.0209013	0.0749381	0.00962179	-0.0313843	-0.0262121	-0.0508657	0.0683994	-0.0508657	0.0305661	0.0294129	0.129382	0.0192024	0.0377047	0.036	0.0470322	0.0536663	0.0214704	0.0601091	-0.00387535	0.111185	0.0262497	0.00753409
57.586	0.0341153	0.061374	0.0765772	0.0983655	0.0365602	0.0376785	0.0685426	0.0535553	0.0530624	0.119716	0.0922287	0.0252375	0.0298592	0.0920079	0.0389987	0.0449157	0.0338316	0.0504669	0.0326844	0.0133252	0.0739623	0.0454287	-0.00433795	0.0381246	0.0206877	0.0995175	0.0206877	0.0465099	0.065618	0.115727	0.0339288	0.0572834	0.060954	0.0355434	0.0213249	0.041522	0.0444655	0.017684	0.0704305	0.0552228	0.00678525
58.595	0.0419276	0.0571464	0.0481579	0.0390089	0.0581899	0.0489311	0.117003	0.054168	0.0539122	0.139285	0.103155	0.0432951	0.0418557	0.094311	0.0930167	0.0696374	0.0959446	0.0764577	0.0305974	0.0283308	0.0182234	0.0977715	-0.024828	-0.0189925	0.0439058	0.0890745	0.0439058	0.0608364	0.0334777	0.142289	0.0597398	0.0436638	0.094022	0.0545863	0.0624565	0.0279093	0.0481723	-0.0103028	0.101367	0.0637411	0.0480986
59.615	0.0117784	0.0588359	0.0939303	0.105583	0.049569	0.0299568	0.0749131	0.0119772	0.056973	0.100615	0.0955061	0.0371003	0.0369204	0.0848357	0.0737552	0.0326737	0.0527467	0.0627037	0.054794	0.0109018	0.0771696	0.0843591	0.0445983	-0.00279735	-0.00947571	0.0690163	-0.00947571	0.0623872	0.0614757	0.133702	0.0539306	0.0497001	0.0200402	0.0151651	0.0454251	0.10262	0.0577114	0.0231068	0.0793848	-0.00831522	0.0314085
60.625	0.0606073	0.101091	0.0920179	0.114525	0.095318	0.0452464	0.0924232	0.0868002	0.0344552	0.094213	0.0962348	0.0334986	0.0492114	0.0751372	0.054877	0.0621431	0.0588925	0.0657295	0.0150768	-0.00990068	0.0242759	0.0556072	0.0614961	0.0674267	-0.050288	0.0562971	-0.050288	0.0499669	0.0346194	0.131449	0.002325	0.0572809	0.0639888	0.0547884	0.0589748	0.0390888	0.0203326	0.00757382	0.0728783	0.0554421	0.00595528
61.645	0.0304192	0.0814437	0.0982119	0.0467532	0.0357444	0.0320496	0.0762403	0.0895942	0.0522822	0.145087	0.0975509	0.0636043	0.0688694	0.101024	0.0780375	0.0447624	0.0719825	0.0576578	0.0296393	0.0311807	0.0658946	0.0389635	0.00706759	-0.0471317	0.0115019	0.112385	0.0115019	0.115203	0.0356164	0.0947975	0.00844498	0.0769027	0.0668185	0.0671922	0.0375948	0.0442919	0.0521119	-0.00418117	0.111044	-0.00750039	0.0264504
62.651	0.0401049	0.0543208	0.104399	0.060989	0.0638031	0.055781	0.0822921	0.0444588	0.0510975	0.0927433	0.094201	0.0658404	0.0521581	0.0511315	0.0524295	0.0461862	0.0509152	0.0800309	0.0697346	0.0356742	0.128577	0.0636058	-0.0226553	-0.0790434	-0.0311043	0.149029	-0.0311043	0.00835635	0.0422143	0.0774813	-2.83521e-05	0.0387836	0.0488721	0.035438	0.0413197	0.0366334	0.0123028	-0.00175383	0.113651	0.0584472	0.0211954
63.682	0.0370192	0.0397748	0.0791437	0.0549125	0.0308464	0.0584856	0.0694672	0.0591812	0.0761617	0.15755	0.114925	0.0966401	0.0648078	0.109533	0.0758492	0.0552451	0.0906663	0.0425336	0.0536948	0.00827428	0.0717362	0.0892515	-0.0454853	0.0330694	0.145865	0.163804	0.145865	0.0439348	0.0124467	0.0853237	0.0279213	0.039001	0.0497832	0.0332206	0.0576775	0.0663422	0.00738729	0.0142088	0.142849	0.0468794	0.0253687
64.701	0.0479142	0.0946989	0.0813438	0.0798773	0.0399623	0.0235999	0.047553	0.0500364	0.0371499	0.13147	0.116794	0.0548423	0.0679337	0.10218	0.0962826	0.0540844	0.0726116	0.0868318	0.0151513	0.0222017	0.0402821	0.0535708	-0.0174134	0.00179602	-0.0754533	0.117537	-0.0754533	0.046747	0.0657453	0.104956	-0.00193221	0.0192004	0.0327598	0.0314221	0.0272162	-0.00965168	0.0114727	-0.0141425	0.0809517	0.0324511	0.00856982
65.711	0.0664946	0.108566	0.0946992	0.0514873	0.0337244	0.0638877	0.0977164	0.157299	0.053668	0.162448	0.113547	0.0788213	0.0595087	0.0646212	0.0810021	0.0502623	0.0145545	0.0709884	0.0698878	0.0418677	0.0661045	0.0763658	0.0435786	-0.000119893	0.00106433	0.175683	0.00106433	0.0596399	0.0274669	0.0852375	0.042789	0.0545838	0.0866339	0.0514247	0.0771317	0.0226096	0.0434134	0.0150813	0.117372	0.00657804	0.0159457
66.731	0.0400322	0.0749198	0.111257	0.0646502	0.0736474	0.0302106	0.058526	0.0830192	0.0521003	0.117152	0.0912021	0.0655248	0.0671356	0.116128	0.0993198	0.077677	0.0654741	0.0850651	0.0667007	0.0348207	0.0515926	0.0655228	0.0647786	0.0886901	-0.0361856	0.0903258	-0.0361856	0.0151803	0.081685	0.106812	0.0280473	0.0495962	0.0567319	0.0341676	0.0363281	0.00295074	-0.00830821	-0.00847134	0.0788858	0.0409316	0.0226138
67.75	0.0494132	0.0811618	0.0882644	0.021454	0.0790256	0.00763096	0.101752	0.0611553	0.0565729	0.164075	0.119176	0.0513034	0.0434118	0.0909955	0.0796371	0.0544859	0.0877922	0.0777295	0.0110337	0.0293853	0.0577343	0.112641	0.0627772	0.102899	0.0684546	0.18453	0.0684546	0.00279777	0.0146219	0.0816719	-0.0213904	0.0500163	0.0697948	0.067304	0.04588	-0.000211038	0.00642248	-0.00198343	0.133262	0.0298613	0.00948485
68.761	0.0291122	0.0853868	0.0695575	0.0440934	0.0830778	0.0407835	0.0778044	0.0448533	0.0590984	0.150955	0.132876	0.0523366	0.0401511	0.0652842	0.0677627	0.0339084	0.0874633	0.0839039	0.0569415	0.0205953	0.0916598	0.0709573	-0.0037132	-0.00494326	0.0584019	0.087798	0.0584019	0.0882828	0.0895671	0.142854	0.109143	0.0280838	0.0407632	0.0590944	0.0656577	0.0398887	0.0125797	-0.00805667	0.1237	0.0337842	0.000616981
69.77	0.0496686	0.0992629	0.0686965	0.0776631	0.0440335	0.0309926	0.0735823	0.081607	0.0471426	0.106833	0.106844	0.0703512	0.0407711	0.0809413	0.060195	0.0440608	0.0703524	0.0797251	0.0930972	0.0216599	0.0509339	0.0549924	-0.00709781	-0.00337292	0.00144608	0.127396	0.00144608	0.0676795	0.0354271	0.0785174	0.0776803	0.0627251	0.0588282	0.0530753	0.0607851	0.0575276	0.0318598	0.00311766	0.0861471	0.00677366	0.0129213
70.781	0.0561701	0.116518	0.120129	0.0539752	0.0717645	0.0500751	0.0985391	0.104423	0.0461932	0.118656	0.105746	0.0383076	0.0593507	0.0772432	0.0492546	0.019409	0.0516426	0.0795033	0.0243256	-0.0115087	0.0428863	0.107423	0.0173006	0.0235904	0.111792	0.219796	0.111792	0.0752802	0.105922	0.119895	0.0271107	0.0533775	0.0499417	0.0421782	0.0450845	0.0427842	0.0325274	0.00481794	0.105216	0.00930248	0.0146432
71.801	0.0478915	0.105656	0.0696384	0.0174994	0.0508732	0.0399042	0.10371	0.0310347	0.0591641	0.127917	0.0679516	0.0534736	0.0734553	0.112941	0.111749	0.0579447	0.0730971	0.0759722	0.0390841	0.00697958	0.0722003	0.108414	0.0281703	0.0489878	-0.0397899	0.14133	-0.0397899	0.0817903	0.0348915	0.117561	0.0411248	0.0479562	0.0629861	0.0280246	0.0454269	0.0683449	0.0378315	0.00192412	0.111132	0.0588293	0.0416625
72.81	0.0389455	0.093566	0.09423	0.0430193	0.0735212	0.059163	0.0599421	0.0778608	0.0598365	0.123304	0.0957437	0.0475785	0.0644501	0.0904278	0.0505259	0.0558481	0.0875215	0.0844023	0.0695255	0.0157727	0.0596267	0.0310449	0.0268828	0.0271288	0.0117904	0.0559319	0.0117904	0.0359768	0.0491255	0.11529	-0.00473937	0.0388269	0.063037	0.0371799	0.0487628	0.0132768	0.0157197	0.0110516	0.0697438	0.0160181	-0.000545656
73.83	0.0164247	0.064265	0.0961274	0.0799355	0.0526873	0.0310415	0.0753886	0.0961253	0.048247	0.146031	0.113481	0.0510216	0.0253063	0.120089	0.0628044	0.0625717	0.0844452	0.0896968	0.0876829	0.00651276	0.0692638	0.0546303	-0.00701236	-0.0303208	-0.00471418	0.145129	-0.00471418	0.101267	0.0345941	0.109362	0.0167846	0.0670026	0.0551475	0.0506496	0.0576135	0.0676612	0.049436	0.0100871	0.0838819	0.0237834	0.0228962
74.85	0.0340344	0.0824693	0.10663	0.0747015	0.0732009	0.046586	0.117192	0.113479	0.0601532	0.152754	0.125582	0.0754358	0.039725	0.10343	0.086809	0.0645554	0.0593881	0.0761307	0.0902548	0.0271628	0.0743511	0.0614613	0.0149816	0.0366779	6.73975e-05	0.192232	6.73975e-05	0.0945679	0.0544336	0.124533	0.0752163	0.071092	0.0970216	0.0693711	0.0357183	0.0809337	0.0494354	0.000624523	0.0805655	0.0183262	0.00805362
75.869	0.0146106	0.0688029	0.0771625	0.0406785	0.0581271	0.0434104	0.100691	0.0872281	0.0585557	0.104781	0.111658	0.0207763	0.0460274	0.0737209	0.072416	0.0653399	0.0680104	0.102736	0.0558418	0.0152386	0.102468	0.0413513	-0.0424489	0.0292222	-0.0370312	0.19449	-0.0370312	0.117045	0.0817781	0.13743	0.0942887	0.0627523	0.0979016	0.0886198	0.0455165	0.0299362	0.017365	0.0042204	0.125262	0.0323418	0.0278295
76.883	0.0394215	0.0721405	0.0971352	0.0764326	0.0511689	0.0329103	0.0868644	0.104485	0.0669851	0.126964	0.112301	0.0539166	0.0550755	0.0834249	0.0572026	0.0407453	0.0703924	0.0787108	0.0307707	0.0242234	0.0633329	0.0777696	-0.0226745	-0.0893068	0.00141613	0.0797518	0.00141613	0.0855669	0.0167592	0.0906573	0.0266434	0.071497	0.0679642	0.0394898	0.0550241	0.0344506	0.020658	-0.0255648	0.106982	0.0547996	0.0417555
77.9	0.0736734	0.0977219	0.0861279	0.0726074	0.0860443	0.0364273	0.0853056	0.0703	0.075755	0.177721	0.125948	0.0675974	0.0316689	0.0896597	0.0649441	0.0658284	0.0648794	0.0979603	0.0316176	0.0163336	0.0322725	0.106446	0.0136895	0.00883413	0.0389259	0.104357	0.0389259	0.0702838	0.0524041	0.0621523	-0.0149099	0.0491449	0.0919914	0.0401451	0.038073	0.00348389	-0.0280662	-0.0100881	0.125936	0.0316524	0.042572
78.92	0.0368224	0.0853215	0.098823	0.14651	0.0814581	0.0527894	0.0835315	0.0518156	0.0709848	0.100797	0.114673	0.0358508	0.0656826	0.0643155	0.086138	0.0304649	0.0891357	0.0819702	0.0984106	0.0372288	0.0951472	0.0164213	0.00674321	-0.134842	0.167805	0.231563	0.167805	0.084788	0.00824973	0.119824	0.0233735	0.0525622	0.0622247	0.0167369	0.0618176	0.0165022	0.0545028	0.00167069	0.106563	0.0881975	0.033041
79.926	0.0482961	0.127081	0.11005	0.103576	0.0633499	0.0546261	0.067982	0.11417	0.0890663	0.103426	0.146859	0.0284826	0.0574642	0.112817	0.102149	0.0432374	0.0505974	0.08468	0.0919072	0.0266103	0.0602729	0.104525	0.00546527	0.0121183	0.0299028	0.101907	0.0299028	0.139596	0.0659994	0.132133	0.0821068	0.0240239	0.0747415	0.0315641	0.028484	0.0464261	0.0197951	0.0045512	0.108567	0.0274881	0.0304993
80.937	0.0795619	0.100872	0.0691525	0.0666237	0.0405805	0.0376676	0.0694876	0.16363	0.0471964	0.142551	0.113843	0.071654	0.0542306	0.0790295	0.064307	0.0607808	0.064785	0.0477334	0.0536654	0.0192335	0.0353033	0.0803483	-0.0204588	0.0177063	-0.0413183	0.137648	-0.0413183	0.043217	0.0359864	0.0738266	0.0189813	0.0724505	0.0861122	0.0532798	0.0372135	0.00706169	0.0228047	0.00261633	0.141483	0.0195149	0.0469145
81.946	0.0332033	0.101832	0.0573933	0.0755223	0.0794941	0.0579774	0.0842778	0.0853067	0.0619311	0.121169	0.154881	0.0945269	0.0415562	0.0802975	0.0767523	0.0798578	0.0665031	0.0834059	0.0693527	0.0233188	0.0608027	0.0756301	0.0168422	0.00164914	0.0243036	0.135767	0.0243036	0.0691089	0.048862	0.0871474	0.0554774	0.0486063	0.0550507	0.0599389	0.0390295	0.0688681	0.0294826	0.000586224	0.139403	0.0483096	0.00865674
82.966	0.0141808	0.10919	0.0728363	0.10842	0.079634	0.0364228	0.139182	0.0350042	0.0999511	0.15113	0.0835337	0.0500915	0.0436712	0.10545	0.0932533	0.0760376	0.0848372	0.0892483	0.0723155	0.0431584	0.146952	0.0507289	-0.0709653	-0.0509862	0.0306551	0.101853	0.0306551	0.114423	0.0767461	0.134925	0.127946	0.0268507	0.0628351	0.0558163	0.0437914	0.032105	0.015083	-0.00593013	0.0927313	0.0295849	0.00521584
83.977	0.0453214	0.0909412	0.0824833	0.0689536	0.0579189	0.0638928	0.0525842	0.0816474	0.0648611	0.114424	0.0928857	0.0490591	0.0479784	0.108241	0.10898	0.0210958	0.0673098	0.0873093	0.051213	0.0127189	0.0578879	0.0734603	0.0746856	0.0544077	0.0508001	0.122533	0.0508001	0.0521447	0.0775253	0.131155	0.0576778	0.0401481	0.0592713	0.0278348	0.0485702	0.0397057	0.0712718	0.0166484	0.0738219	0.0347626	-3.23934e-05
84.996	0.0477532	0.0884388	0.107963	0.0574041	0.0731323	0.0318075	0.123242	0.15143	0.0618868	0.135845	0.122172	0.0807042	0.0473798	0.124069	0.0869532	0.0285493	0.0729906	0.0809414	0.0604581	0.0133612	0.0491455	0.0552648	-0.000745413	-0.0334879	0.0637927	0.147997	0.0637927	0.0773397	0.049656	0.103835	0.0352284	0.0397491	0.0455574	0.0497599	0.0500566	0.055519	0.0518776	0.00360476	0.129171	0.056947	0.0632659
86.016	0.0275529	0.0792856	0.0883491	0.0495016	0.0716555	0.0375351	0.0795594	0.111632	0.0599662	0.133776	0.0940968	0.0482897	0.0824057	0.114418	0.099122	0.0589265	0.0361213	0.0726436	0.0812755	0.0202318	0.085446	0.056498	0.0850051	0.11272	0.0203079	0.101905	0.0203079	0.0869135	0.0458954	0.10065	0.0802787	0.0541743	0.0775059	0.0365012	0.0919976	0.0920232	0.0600412	0.0387386	0.0813189	0.0416128	0.0178007
87.027	0.0335525	0.147195	0.0837556	0.0847453	0.0656024	0.0428887	0.0816506	0.113915	0.0670874	0.149799	0.12812	0.07075	0.0567445	0.0979409	0.0871613	0.0629787	0.048576	0.0832132	0.0868302	0.0409925	0.0663377	0.0800369	-0.00561265	0.0725332	0.00816193	0.114235	0.00816193	0.0527747	0.0516491	0.107799	-0.00150408	0.0767583	0.0758155	0.0432986	0.0544811	0.0373991	0.0444509	0.00869149	0.0992674	0.0410178	0.00670679
88.036	0.056973	0.0734218	0.0966375	0.0481322	0.0774248	0.0312216	0.104459	0.113667	0.0653861	0.0861437	0.126428	0.0417461	0.0407978	0.0727879	0.109182	0.0855618	0.0897869	0.096263	0.136603	0.0537527	0.0816822	0.061076	0.0253375	-0.0136403	-0.0118665	0.0937123	-0.0118665	0.094093	0.0806451	0.0865935	0.0371578	0.0524126	0.0878705	0.0658628	0.0527946	0.0395669	0.0237271	-0.0103563	0.130229	0.0219748	0.0510932
89.056	0.0656396	0.0863619	0.0916158	0.102421	0.0659242	0.0251331	0.0804894	0.14054	0.0589186	0.189664	0.144877	0.0860277	0.0582824	0.116933	0.0841464	0.06435	0.0696008	0.0771553	0.0660477	0.0516313	0.0530998	0.092134	0.000225974	0.0272053	0.0679202	0.221534	0.0679202	0.0647256	0.0687996	0.115098	0.0741806	0.0475163	0.0540594	0.0491763	0.0438168	0.0148847	0.0255645	-0.000193842	0.0678641	0.0330066	-0.0340151
90.056	0.0116438	0.0854793	0.0913957	0.0432122	0.0839828	0.0540318	0.0904316	0.0918935	0.0717013	0.182351	0.129198	0.0763589	0.0765188	0.0929035	0.0967219	0.0807329	0.0715929	0.0941277	0.0651507	0.0246128	0.0444651	0.0740325	-0.04639	-0.0111691	0.0433818	0.106606	0.0433818	0.117293	0.0860431	0.143662	0.12281	-0.00855013	0.0389113	0.0171919	0.0372499	0.0217159	0.0490075	0.00889539	0.059092	0.0656738	0.0150335
91.076	0.0248018	0.0946075	0.095459	0.0718638	0.10366	0.0272716	0.097893	0.0977716	0.0576131	0.163452	0.0954556	0.0564401	0.0527093	0.0849279	0.0556237	0.0978488	0.0629527	0.0818546	0.0649839	0.0181301	0.075051	0.0741435	0.0054755	0.0143296	-0.0245158	0.0912053	-0.0245158	0.0507677	0.0754113	0.121694	0.047445	0.0491381	0.0697661	0.0101211	0.0785298	0.0396659	0.048824	0.0215541	0.0496818	0.0231972	0.00762998
92.096	0.050766	0.0749812	0.0639519	0.0694495	0.0623952	0.0462086	0.128892	0.1229	0.0663898	0.112993	0.105815	0.0738801	0.0689402	0.110458	0.0600018	0.0370204	0.0220626	0.0804694	0.130215	0.0862668	0.0668576	0.107909	0.0570721	0.0302397	0.0304235	0.129051	0.0304235	0.110706	0.0706165	0.129558	0.016931	0.0148007	0.0539811	0.0516835	0.0465183	0.0612462	0.0585065	-0.00712168	0.157873	0.0514321	0.0360629
93.107	0.0522301	0.0654418	0.0888109	0.103365	0.0903922	0.0514212	0.0680039	0.113672	0.0681445	0.122637	0.103993	0.0460609	0.0499345	0.107025	0.111616	0.099456	0.0531603	0.0823366	0.0591037	0.0354832	0.0529725	0.0937125	0.0549479	-0.0234379	0.0664524	0.148601	0.0664524	0.0791804	0.104226	0.100608	0.0356039	0.0382533	0.0568086	0.0499245	0.0504285	0.0321864	0.0428269	-0.0193636	0.0987901	0.0258213	0.0277381
94.113	0.0579828	0.0987188	0.138014	0.106245	0.0695385	0.0323372	0.0608407	0.101096	0.0906151	0.131681	0.0963824	0.047109	0.0652376	0.105506	0.0983056	0.0597623	0.0572453	0.0671059	0.0645227	0.0287917	0.0687105	0.0754348	0.0339029	0.0462608	-0.00561788	0.113118	-0.00561788	0.0523037	0.0459846	0.0829916	-0.00496108	0.0405493	0.0977462	0.0117653	0.0450271	0.0431847	0.0729246	0.0050431	0.108806	0.0602278	0.0198829
95.133	0.056207	0.111236	0.0927216	0.0757103	0.082357	0.0651846	0.109793	0.158473	0.075542	0.143732	0.137947	0.0975486	0.057889	0.108285	0.0970659	0.0674918	0.0785945	0.072702	0.0846846	0.0738186	0.111211	0.0729524	0.0353151	0.0557694	0.00361682	0.050525	0.00361682	0.0604645	0.0742077	0.0786086	-0.00472356	0.0467901	0.0643936	0.0503156	0.0483958	0.00119293	0.0396754	0.0131315	0.106587	0.0592822	0.0534074
96.146	0.0838731	0.0782144	0.106519	0.0823803	0.0510855	0.0607079	0.0956273	0.143294	0.0882224	0.0869866	0.101844	0.0192163	0.06608	0.0963082	0.076924	0.0825266	0.0907444	0.110825	0.0814086	0.0728028	0.0469791	0.0921613	-0.0204124	-0.029246	-0.050584	0.0555769	-0.050584	0.0512525	0.0558129	0.0910125	-0.0440416	0.0404587	0.0564592	0.0625245	0.0338728	0.0441076	0.0447394	0.000787897	0.0739682	0.0251695	0.0280184
97.166	0.0337369	0.133814	0.104128	0.0537668	0.0741492	0.0449704	0.0498584	0.0860992	0.0570912	0.134166	0.111714	0.10075	0.0604219	0.0979839	0.0846482	0.0452499	0.0476158	0.0879856	0.069112	0.0514288	0.0622698	0.0791043	-0.0016437	-0.00381247	-0.045248	0.111617	-0.045248	0.0487865	0.0833226	0.13397	0.0743887	0.0622204	0.0909394	0.0628298	0.0378057	0.0356957	0.0317778	0.00635895	0.0739334	0.0650148	0.0324448
98.172	0.0579356	0.110385	0.100955	0.0799815	0.0909585	0.0612352	0.0484683	0.145138	0.0747478	0.193027	0.126315	0.0733116	0.0568086	0.084349	0.0862202	0.041427	0.0535955	0.0733372	0.0841197	0.0601365	0.135916	0.0557911	0.0592344	0.0110682	-0.00366361	0.10529	-0.00366361	0.0535393	0.0617175	0.123869	0.0556826	-0.0200399	0.0691115	0.0307764	0.0414433	0.0364687	0.0297959	0.00032357	0.185729	0.137482	0.00277825
99.192	0.0209639	0.0815592	0.0902019	0.0911295	0.0672874	0.0389623	0.0385837	0.141337	0.0745925	0.127013	0.101021	0.0578456	0.0786278	0.101403	0.0908473	0.0442293	0.0600254	0.069846	0.0485916	0.0467682	0.0854796	0.0815849	0.0645541	0.0747036	0.0315794	0.172209	0.0315794	0.060091	0.0507579	0.10036	-0.00550371	0.0612909	0.0677536	0.0165902	0.039457	0.0228156	0.0143626	-0.0148651	0.133925	0.056793	0.0329537
100.215	0.0449232	0.0858162	0.0846753	0.0586509	0.101984	0.0763325	0.0665445	0.137003	0.0660551	0.146095	0.0917307	0.0868122	0.0576962	0.111547	0.103627	0.0800016	0.0810147	0.0926914	0.0465549	0.0431537	0.0769367	0.0834687	0.045815	0.0634405	0.0295999	0.074504	0.0295999	0.0818047	0.0736913	0.126564	0.0548898	0.0572722	0.0648135	0.0466298	0.0609933	0.0472634	0.0514491	-0.0081443	0.189736	0.0769348	0.00919267
101.229	-0.0119674	0.0804301	0.0822247	0.117372	0.0716745	0.0667733	0.0751736	0.138802	0.0832116	0.128896	0.0814935	0.0865374	0.0696286	0.119613	0.0989944	0.0482196	0.0595539	0.0661148	0.0505218	0.0507548	0.0938985	0.0527116	0.0214334	-0.0042056	-0.00334458	0.152518	-0.00334458	0.0756388	0.0305493	0.0768305	0.0248867	0.0556958	0.0899831	0.0587221	0.0611911	0.060292	0.0444327	0.00543987	0.158034	0.0510876	0.00855908
102.237	0.0320029	0.128644	0.100456	0.0684597	0.0991487	0.0554695	0.0646687	0.17607	0.0769819	0.191312	0.119109	0.0629515	0.0553042	0.114672	0.0847609	0.0922393	0.0704463	0.0876254	0.0919275	0.045655	0.0942109	0.0852269	-0.025638	0.0195139	0.0352233	0.172621	0.0352233	0.0607973	0.0594805	0.0744614	0.130638	0.035749	0.0661946	0.0755551	0.07911	0.0507917	0.0332368	0.0104812	0.101981	0.0885405	-0.0118643
103.274	0.0326447	0.0899003	0.0779802	0.0571795	0.0668348	0.0340425	0.105231	0.115121	0.0767368	0.112426	0.0795385	0.0363126	0.0577693	0.125299	0.122031	0.0493843	0.0694798	0.0626119	0.0443479	0.0466376	0.100477	0.10787	-0.024886	-0.097093	0.0260623	0.0608126	0.0260623	0.0866255	0.115247	0.134477	0.130688	0.0179281	0.0715215	0.0444546	0.0745628	0.0180555	0.0153491	0.00567907	0.0459518	0.0333402	-0.00373235
104.288	0.0342319	0.105522	0.0959123	0.060997	0.0655763	0.0495845	0.102225	0.115363	0.0534153	0.115356	0.127559	0.0677164	0.075049	0.10086	0.0997314	0.0379372	0.0882167	0.0879809	0.074295	0.04656	0.0979655	0.0639478	0.0341188	-0.0345606	-0.0237207	0.0454619	-0.0237207	0.0809593	0.074123	0.119063	0.0724039	0.0403411	0.0701153	0.0428207	0.0635172	0.0366084	0.0594635	0.000616368	0.143495	0.0278999	0.00916898
105.308	0.0265544	0.129381	0.0851421	0.0882029	0.0883643	0.0479456	0.0668648	0.103305	0.0636897	0.122189	0.093606	0.0237454	0.0664244	0.122177	0.0754512	0.0779495	0.0530791	0.0893148	0.0504048	0.0763202	0.109194	0.108055	0.0183715	0.0104892	0.0570054	0.162607	0.0570054	0.0794872	0.0647979	0.107603	0.0599412	0.0292535	0.0840179	0.0669223	0.0749302	0.00733709	0.00696686	-0.0072002	0.188718	0.0651516	0.0209835
106.319	0.0655887	0.0723513	0.098294	0.0511813	0.0780975	0.0526555	0.0675805	0.105477	0.0642748	0.130949	0.0742914	0.0734262	0.0724099	0.109712	0.10878	0.0785651	0.0840868	0.0778508	0.0420046	0.0549415	0.0982872	0.109858	0.0825099	0.0163257	0.0553442	0.165814	0.0553442	0.104482	0.0676575	0.123429	0.00788122	0.0601527	0.0946555	0.0770524	0.043529	0.0694187	0.0214585	-0.0164646	0.0618344	0.059276	0.0385858
107.328	0.038023	0.0839899	0.132485	0.0835479	0.0644044	0.0678085	0.0812412	0.128239	0.0707893	0.146554	0.0982289	0.0820488	0.0474181	0.107705	0.0882485	0.0753112	0.0797265	0.0889983	0.0262202	0.047204	0.068067	0.0749585	0.0327601	-0.00442621	0.0107237	0.0872582	0.0107237	0.070752	0.0608485	0.123138	-0.00217349	0.036143	0.0654606	0.0659828	0.0545599	0.0447436	0.0251556	0.00724621	0.124656	0.0288848	-0.0133418
108.367	0.0600695	0.0893076	0.105236	0.119041	0.0706467	0.0519825	0.0873113	0.174442	0.0735412	0.11317	0.0943894	0.0641471	0.0347853	0.0963219	0.0930592	0.0611194	0.0763817	0.0830174	0.0425048	0.0788876	0.0927605	0.0759307	0.0611148	0.0369885	-0.0175275	0.157745	-0.0175275	0.086333	0.0609914	0.10389	0.0664183	0.08238	0.0757106	0.0537229	0.0685833	0.0377054	0.0590801	0.0205752	0.12786	0.0364401	0.0309383
109.378	0.0467077	0.0868257	0.080124	0.102344	0.0630775	0.0556213	0.122556	0.123485	0.0912523	0.121671	0.104084	0.072639	0.0579677	0.0940634	0.147892	0.0383316	0.0600503	0.0695279	0.0463541	0.0704035	0.0980645	0.0778757	0.0477759	-0.0150844	-0.0160103	0.120394	-0.0160103	0.0626052	0.071327	0.115073	0.040827	0.0364224	0.0756006	0.0637083	0.0722322	0.024445	0.0238157	-0.0122756	0.127476	0.0248664	0.0253958
110.387	0.0459063	0.126718	0.121976	0.0642343	0.0865051	0.0425938	0.056988	0.15644	0.0594178	0.182339	0.136516	0.0757207	0.0472842	0.118511	0.126656	0.0786154	0.0961729	0.051765	0.053895	0.0647833	0.0260979	0.0631345	-0.000717241	-0.00227988	0.0574339	0.166749	0.0574339	0.0395337	0.0497502	0.130214	0.0574252	0.0299081	0.0644267	0.0964716	0.062152	0.0536753	0.0759667	0.0154816	0.0356941	0.0568387	0.0670233
111.398	0.0459084	0.0971114	0.0769799	0.0573254	0.0609367	0.080184	0.064703	0.152179	0.0749182	0.172848	0.116024	0.0895274	0.0347015	0.102145	0.114294	0.109723	0.0690897	0.107331	0.0985915	0.092981	0.101916	0.0517197	-0.00690706	0.000494	-0.00260532	0.145695	-0.00260532	0.115314	0.0532217	0.151409	0.0766982	0.0315428	0.082922	0.0676999	0.0796403	0.073648	0.00524997	-0.00552379	0.109934	0.0245892	0.00757518
112.418	0.0439045	0.072055	0.117714	0.0984405	0.117234	0.0499783	0.0876976	0.177796	0.0927239	0.142475	0.100916	0.0825507	0.0533244	0.0897236	0.132408	0.0861161	0.0290467	0.0788361	0.000991548	0.0173466	0.0515614	0.0612801	0.0135571	-0.0587685	-0.004457	0.0492782	-0.004457	0.0926706	0.0729003	0.0974275	0.0672567	0.0566839	0.096245	0.0916179	0.0775057	0.0228058	0.0258409	-0.00313959	0.124748	0.0489509	0.00890133
113.441	0.0407956	0.144822	0.122494	0.0581263	0.0673403	0.0608639	0.0612731	0.199257	0.065227	0.162654	0.0894366	0.0943556	0.0541915	0.106545	0.0819924	0.0543487	0.0817006	0.0711835	0.0649908	0.0537148	0.101141	0.0950896	0.0507859	0.0352223	0.0753315	0.141917	0.0753315	0.0525791	0.0481128	0.110415	0.0286193	0.0302015	0.0871046	0.0692651	0.053932	0.0348792	0.0271767	-0.0058077	0.115078	0.0652398	0.0529698
114.447	0.069806	0.119222	0.104879	0.142075	0.0938738	0.0341294	0.0620724	0.159556	0.06921	0.215281	0.0897096	0.0660873	0.0476057	0.111469	0.0949147	0.061366	0.0847529	0.0930496	0.0134137	0.054592	0.112742	0.0784821	0.0711302	-0.0434071	0.0734939	0.116905	0.0734939	0.066606	0.0681713	0.0921519	-0.0228386	0.0241567	0.0751733	0.0646626	0.0583296	0.0878852	0.024718	-0.00668212	0.119843	0.0416598	0.0843294
115.48	0.0493978	0.0968354	0.102239	0.100174	0.058677	0.0531256	0.0722811	0.135727	0.0762695	0.222654	0.0854728	0.053803	0.0742149	0.0984563	0.126157	0.0655598	0.0570394	0.0878361	0.056161	0.066584	0.0686585	0.084961	0.0146891	-0.0807918	0.078532	0.160462	0.078532	0.0352272	0.0636363	0.0945057	0.0369575	0.0395987	0.0756826	0.0621566	0.0627424	0.0973926	0.0549557	0.0150731	0.123951	0.00294257	0.0397155
116.497	0.0320341	0.110191	0.13576	0.0854571	0.121989	0.048055	0.0889246	0.0717486	0.0618953	0.12043	0.0980655	0.0688614	0.0563063	0.0980562	0.102921	0.140259	0.0671275	0.0863554	0.0425989	0.0425361	0.103652	0.0767635	0.0400849	0.0871928	0.018879	0.106236	0.018879	0.0607955	0.0274211	0.0837281	0.026203	0.0341726	0.0572267	0.0494493	0.0709899	0.0560973	0.0310656	0.0167647	0.106663	0.0416681	0.0726039
117.506	0.0415882	0.143968	0.117567	0.0995957	0.0661419	0.0652319	0.0950199	0.13442	0.0599666	0.159999	0.105624	0.0637581	0.0552828	0.118154	0.134772	0.0980578	0.0822832	0.0639384	0.0814972	0.0630881	0.118061	0.0623145	0.0805814	0.00852908	0.0966028	0.163727	0.0966028	0.0771747	0.0529413	0.101484	0.0846151	0.0649381	0.0955645	0.092521	0.0889244	0.0305206	0.0332554	-0.0098498	0.104602	0.029086	0.0552411
118.52	0.0471983	0.0799475	0.108488	0.083257	0.0784077	0.0540501	0.069457	0.196164	0.0703002	0.161148	0.118424	0.0772564	0.0532803	0.103218	0.085797	0.0591573	0.0282446	0.0685645	0.100758	0.0729094	0.108298	0.0848689	0.0632661	-0.0051201	-0.0170834	0.183125	-0.0170834	0.0492234	0.0535883	0.0950004	-0.0139055	0.0271898	0.0711451	0.0608176	0.0834569	0.0834356	0.073253	0.0313142	0.0788598	0.0231614	0.0758493
119.537	0.0507493	0.14693	0.123917	0.0490267	0.0896298	0.0569788	0.0788532	0.206663	0.0433155	0.181155	0.0935966	0.102838	0.074324	0.0772569	0.0627206	0.0448438	0.0463947	0.0791214	0.0903484	0.0828428	0.0968628	0.077818	0.097534	-0.0576684	0.0298473	0.141819	0.0298473	0.0577024	0.0960248	0.11598	0.0679093	0.040496	0.0555617	0.0473611	0.0942347	0.0548583	0.0264942	0.00307692	0.0735467	0.0409794	0.0447185
120.548	0.0573786	0.0826026	0.0951461	0.0409644	0.107775	0.0630765	0.133601	0.233357	0.0636047	0.1578	0.10164	0.0785675	0.055237	0.0875613	0.098705	0.0313445	0.0876436	0.0765266	0.0253119	0.0702029	0.0599538	0.0783511	0.0411751	0.0316928	0.0845367	0.0954779	0.0845367	0.111801	0.0468172	0.10668	0.0293262	0.0505532	0.0610528	0.0398095	0.0703178	0.0967163	0.0579755	0.00598803	0.101892	0.023132	0.0355185
121.557	0.0281707	0.12411	0.107703	0.0360601	0.083734	0.0365961	0.10114	0.126158	0.045253	0.126891	0.0933102	0.0290394	0.0404588	0.107668	0.101287	0.058285	0.0411708	0.0671599	0.0632518	0.0641842	0.0957835	0.0641969	0.0826906	0.0669759	0.11287	0.129568	0.11287	0.0656461	0.0301376	0.0837704	0.0198491	0.014921	0.0746986	0.087204	0.106934	0.0913663	0.00370562	0.0155611	0.173739	0.0530912	0.057222
122.574	0.0266415	0.115205	0.0940119	0.0521943	0.0739868	0.0561988	0.136908	0.137361	0.0425285	0.147467	0.077596	0.0345354	0.0610096	0.12977	0.105234	0.0637401	0.0621932	0.0684011	0.0868828	0.0397529	0.130552	0.0231782	0.00706837	-0.0314274	0.0795111	0.0910123	0.0795111	0.083017	0.0545513	0.100465	0.0512305	0.0426741	0.0955679	0.0669631	0.0849355	0.0827581	0.0368241	0.0125703	0.0826872	0.0498845	0.013227
123.577	0.052316	0.133487	0.100726	0.106184	0.100586	0.0452847	0.112189	0.157268	0.0861748	0.145961	0.104583	0.0728387	0.0391983	0.11939	0.101613	0.0764876	0.071002	0.0673211	0.0840735	0.087143	0.0855505	0.0711839	0.0479197	0.000442901	-0.00456056	0.0338068	-0.00456056	0.0555226	0.0228986	0.0861556	-0.021093	0.057507	0.0632039	0.053684	0.0653787	0.0520519	0.0386551	0.0203538	0.0811008	0.0774407	0.0240657
124.61	0.0517645	0.0994945	0.138918	0.0602217	0.0926021	0.0395518	0.0765797	0.199516	0.062517	0.181441	0.119945	0.0786624	0.0511031	0.0940518	0.0892757	0.0599591	0.0507137	0.0729891	0.00753744	0.0482355	0.0478811	0.0815151	0.0138197	-0.0241031	-0.00802501	0.0947385	-0.00802501	0.0754794	0.0912287	0.100969	-0.01127	0.0418852	0.0612779	0.0473787	0.0760455	0.0281494	0.0237864	-0.0120516	0.0846616	0.0369312	0.0136048
125.619	0.0282998	0.108064	0.126228	0.0763385	0.11518	0.0692575	0.107846	0.108487	0.0463887	0.173154	0.0831042	0.0845011	0.0686338	0.118302	0.10729	0.0503548	0.041507	0.0667084	0.08428	0.0543235	0.0978263	0.108877	0.0746654	0.0248663	0.0446211	0.141264	0.0446211	0.0824343	0.0734038	0.123949	0.049136	0.0644729	0.077468	0.00692682	0.0499198	0.0466867	0.0545318	0.00262833	0.087502	0.0192478	0.00871724
126.63	0.0579952	0.127582	0.149378	0.0724231	0.0952394	0.0573929	0.123958	0.145635	0.0805315	0.152617	0.0917165	0.071758	0.0408008	0.108167	0.100266	0.0722525	0.0719498	0.103401	0.0459021	0.0245041	0.0563036	0.0277261	-0.0219121	-0.0565402	0.0471856	0.0796761	0.0471856	0.0690737	0.0819141	0.0919436	0.0256931	0.0669128	0.0872342	0.0225447	0.0926237	0.0783241	0.0528876	0.0104027	0.11097	0.0451583	0.0315954
127.639	0.0372561	0.0979912	0.131132	0.119568	0.0868046	0.0615169	0.0975618	0.201038	0.0591407	0.168968	0.0817799	0.0991008	0.067539	0.14933	0.100947	0.0471644	0.0497754	0.0606754	0.00918274	0.0426198	0.0677353	0.0697276	0.0594697	-0.0541952	-0.0198097	0.142069	-0.0198097	0.100902	0.0335516	0.136953	0.0299325	0.0748556	0.0799255	0.0377732	0.0645638	0.0467217	0.0958348	0.00351129	0.108478	0.0263614	0.039669
128.659	0.0432281	0.102408	0.113741	0.093304	0.122463	0.0734174	0.0506572	0.141465	0.051621	0.241585	0.0917779	0.0686406	0.0680605	0.142662	0.112365	0.0432039	0.0492828	0.061012	0.0151379	0.0370493	0.0657869	0.0717214	0.0317	0.0408841	0.0510632	0.145615	0.0510632	0.0653041	0.101592	0.107501	0.0218831	0.043524	0.0774398	0.0245201	0.103651	0.0660887	0.06489	0.0102479	0.125938	0.0150334	0.0626482
129.664	0.0311698	0.0978722	0.10418	0.0877315	0.0837337	0.0715169	0.0812267	0.179019	0.0855093	0.183449	0.122725	0.100084	0.0787875	0.144245	0.111114	0.0287112	0.0565391	0.0745152	0.0963888	0.0762488	0.1419	0.0370385	0.0262772	0.0638541	0.0782314	0.132728	0.0782314	0.0486332	0.0679358	0.110312	0.0356506	0.0489379	0.0832258	0.0687835	0.109618	0.0366	0.0671797	0.00777941	0.105932	0.043473	0.0124348
130.699	0.0268511	0.129078	0.108249	0.110497	0.124195	0.0751398	0.0978826	0.138812	0.0679579	0.192277	0.127872	0.103033	0.0815895	0.0851048	0.106918	0.0497864	0.0204819	0.0651466	0.0252212	0.0558104	0.133985	0.051302	0.0256371	-0.0260868	0.00772133	0.129162	0.00772133	0.0820691	0.0348004	0.110399	0.0244417	0.0347736	0.0472254	0.00121238	0.0936191	0.0413524	0.00795105	0.00628708	0.141766	0.0413257	0.085933
131.719	0.0248011	0.0948697	0.135347	0.064952	0.1035	0.0499227	0.107859	0.179456	0.0615742	0.21275	0.110639	0.12402	0.0592383	0.108519	0.110032	0.0527748	0.0434354	0.0862288	0.0384605	0.0234752	0.0278331	0.0516849	0.0571704	0.0606132	0.125948	0.121223	0.125948	0.0987471	0.090153	0.153739	0.0574337	0.0580217	0.0589633	0.0117121	0.0974606	0.0303481	0.0454554	-0.00578477	0.103905	0.0837624	0.0507957
132.726	0.0450854	0.114494	0.115167	0.0487391	0.0896169	0.0446535	0.0848218	0.126799	0.076821	0.172929	0.119238	0.0787963	0.0574936	0.131615	0.138752	0.0569354	0.0391186	0.0599977	0.0280586	0.0357179	0.049289	0.0737985	0.0310567	-0.0966449	0.106482	0.154817	0.106482	0.0650021	0.0881042	0.125389	0.0685017	0.0258699	0.0806702	0.0323752	0.0859754	0.0767052	0.04418	0.00675146	0.0884211	0.0250047	0.0621621
133.746	0.051728	0.117304	0.127941	0.0849502	0.0700708	0.050254	0.076524	0.122502	0.0657698	0.175721	0.109676	0.128293	0.0467516	0.114612	0.119839	0.0727227	0.0705558	0.0812543	0.0648059	0.0436123	0.0990175	0.0520697	-0.0279317	-0.0630342	0.112755	0.11074	0.112755	0.0861418	0.0632166	0.126871	0.0227361	0.0748403	0.0798309	0.0356965	0.0910061	0.0988421	0.0646724	0.00667193	0.195644	0.0777895	0.0255036
134.766	0.0364952	0.154776	0.148217	0.0914583	0.121358	0.0548663	0.109021	0.153527	0.0565092	0.188644	0.122721	0.0839001	0.063507	0.105007	0.109183	0.0382321	0.0513599	0.0675819	0.0872084	0.0790158	0.074873	0.0665593	0.0107613	0.0783064	0.0287205	0.0538594	0.0287205	0.0555053	0.0492513	0.125833	-0.00280411	0.0166247	0.0838286	0.0594847	0.0975102	0.110098	0.0757303	0.0245571	0.142245	0.0657187	0.0614317
135.792	0.0506552	0.157453	0.116903	0.0746563	0.129177	0.057269	0.0707347	0.249977	0.0638641	0.196706	0.13733	0.0830489	0.0766955	0.100498	0.104271	0.0760881	0.0575061	0.0956336	0.0431852	0.0464062	0.104831	0.0642405	0.030476	0.00367402	0.077696	0.145359	0.077696	0.102699	0.086855	0.154298	0.0657054	0.0621001	0.0714485	0.0352014	0.130373	0.096133	0.0553071	0.0164742	0.109279	0.0617681	0.0183309
136.792	0.059697	0.125582	0.133215	0.0596521	0.0825978	0.0465098	0.0704152	0.183	0.0840583	0.196147	0.068909	0.0832887	0.072028	0.119718	0.122325	0.0498653	0.0598805	0.0492737	0.131752	0.104198	0.0954169	0.106978	0.0552472	-0.0275639	0.054414	0.0837253	0.054414	0.07737	0.0745107	0.14069	0.0454988	0.0278543	0.0835448	0.0278952	0.078648	0.0392603	0.0233646	-0.00541187	0.113064	0.0520746	0.0445852
137.822	0.0515494	0.117827	0.133836	0.0706979	0.0833551	0.0792154	0.0836303	0.198089	0.076728	0.211734	0.121658	0.101406	0.0767106	0.119187	0.128854	0.0579205	0.0373115	0.0906923	0.0712439	0.0740513	0.132066	0.0989278	0.0464996	-0.0182274	0.0430204	0.102075	0.0430204	0.142279	0.0888588	0.130756	0.076354	0.0439776	0.0752937	0.0219176	0.087855	0.0693922	0.0187141	-0.0151275	0.0715935	0.0195162	0.0745854
138.822	0.0379074	0.117105	0.12667	0.0602991	0.106525	0.0516472	0.0738822	0.199131	0.0627983	0.194721	0.0805534	0.0765987	0.0811075	0.117639	0.109148	0.032619	0.0475597	0.0713828	0.0760608	0.068517	0.105194	0.05749	0.0889057	-0.0618898	0.0484132	0.118084	0.0484132	0.123391	0.0748735	0.157937	0.101857	0.0235788	0.0640568	0.0219109	0.0926243	0.0504565	0.00973339	0.00257294	0.129765	0.0253108	0.0408463
139.842	0.0810587	0.10988	0.146214	0.08271	0.100282	0.0347491	0.10391	0.255265	0.0616217	0.187633	0.135336	0.112004	0.08208	0.130996	0.115482	0.0441476	0.042304	0.0915387	0.0485362	0.0682189	0.0772383	0.0718987	0.0590273	0.0274124	0.0406154	0.145919	0.0406154	0.125873	0.0629269	0.133631	0.114394	0.030492	0.0835482	0.00755067	0.0955109	0.0646368	0.0327537	0.0169549	0.136681	0.0876086	0.0759644
140.848	0.0362137	0.10747	0.105685	0.0969215	0.0743269	0.0352411	0.125711	0.221585	0.0571603	0.13125	0.0949634	0.0625204	0.0554893	0.0837555	0.111362	0.0643898	0.0808647	0.0431696	0.0876883	0.0564171	0.085986	0.108361	0.0724877	0.139172	0.0617563	0.10781	0.0617563	0.0786757	0.0926342	0.147593	0.0907619	0.0575646	0.0756146	0.018333	0.0724403	0.0615132	0.0464549	0.0229285	0.172358	0.0995001	0.0874803
141.871	0.0468912	0.126608	0.129259	0.115186	0.150652	0.0676235	0.106544	0.201598	0.076771	0.162608	0.14097	0.0923318	0.0843076	0.0825884	0.0882773	0.0369031	0.026385	0.0673945	0.099647	0.046462	0.0823957	0.0542632	0.0337849	0.00955228	0.0502644	0.0937837	0.0502644	0.171685	0.0840503	0.163134	0.13234	0.0321939	0.0864921	-0.00680056	0.072078	0.0591696	-0.00806283	0.0124642	0.113942	0.0557285	0.0832649
142.879	0.0548399	0.130934	0.187138	0.0963936	0.102858	0.0392446	0.0796814	0.170566	0.106762	0.176954	0.115483	0.104942	0.0584293	0.0653621	0.124649	0.0333802	0.0644252	0.0670894	0.115764	0.0530136	0.0937029	0.084265	0.0369979	0.0245664	0.114394	0.148228	0.114394	0.110884	0.0430556	0.123481	0.0918985	0.0388738	0.0737852	0.100176	0.102152	0.0861973	0.028828	0.00997305	0.100576	0.0413443	0.0453275
143.891	0.0798157	0.129001	0.127121	0.0754439	0.106616	0.0369062	0.0613707	0.206663	0.0906878	0.187311	0.123685	0.0666022	0.0810978	0.0730638	0.087702	0.0646553	0.0606443	0.0621841	0.0986422	0.0590508	0.0543483	0.0831302	0.0208702	0.0088038	0.0647567	0.145237	0.0647567	0.134118	0.0651978	0.140009	0.0829655	0.0429398	0.0716381	0.0379077	0.103533	0.0601204	0.101213	0.0134813	0.122266	0.0694805	0.0438665
144.911	0.0630727	0.186614	0.142469	0.114249	0.135577	0.0567727	0.100407	0.126903	0.0690874	0.187801	0.105909	0.0794154	0.0697163	0.0921361	0.146287	0.0541355	0.0489088	0.0628696	0.0850536	0.0715466	0.0892456	0.0663345	0.0652502	-0.0322978	0.09273	0.162756	0.09273	0.105706	0.0553923	0.0962185	0.0850301	0.0335713	0.0860015	0.0352586	0.0819775	0.0629515	0.0403983	-0.00549324	0.114807	0.00555052	0.0121568
145.941	0.0557141	0.116964	0.125868	0.1019	0.1289	0.029885	0.126094	0.124213	0.0654463	0.156452	0.103541	0.103223	0.074798	0.115905	0.123115	0.0520448	0.0617867	0.0875116	0.103553	0.0889605	0.108851	0.0763646	0.082704	0.00812113	0.0654707	0.0814953	0.0654707	0.0906838	0.0947689	0.16061	0.0389651	0.0507186	0.107499	0.00580735	0.123242	0.0942097	0.00993844	0.0122566	0.125113	0.166151	0.0343558
146.958	0.0469157	0.107125	0.100798	0.0964346	0.113565	0.0626849	0.100235	0.165371	0.0816652	0.136377	0.11214	0.0644865	0.0615093	0.12265	0.121038	0.0625497	0.0998454	0.0717272	0.0993359	0.0669858	0.121819	0.0594513	0.0471449	-0.00879356	0.0856157	0.195777	0.0856157	0.0793805	0.059627	0.130813	0.114442	0.0476104	0.0838459	-0.0284531	0.119124	0.109517	0.0234406	0.010276	0.121128	0.0578151	0.0441419
147.967	0.0370109	0.174026	0.13765	0.0569128	0.127913	0.0582203	0.0700728	0.208811	0.0692896	0.196569	0.0976752	0.0821248	0.0566352	0.1131	0.133891	0.0664406	0.0391608	0.0993188	0.134736	0.056897	0.132015	0.113323	0.0645434	0.0119685	0.110572	0.159268	0.110572	0.073735	0.0952754	0.145554	0.0741824	0.0213082	0.0615307	0.0225508	0.0834125	0.0730953	0.0439046	0.0211187	0.0942802	0.0337601	0.0460686
148.984	0.0661766	0.111956	0.124572	0.0385872	0.105577	0.0671801	0.128132	0.213157	0.0862087	0.198007	0.0949449	0.11487	0.0653442	0.102975	0.0817519	0.0535446	0.0795505	0.0640883	0.0974092	0.0962612	0.0740376	0.0767498	0.107771	0.0807193	0.0571217	0.124699	0.0571217	0.132267	0.0989298	0.150463	0.0725188	0.0270509	0.0782395	0.0571821	0.0947532	0.0791794	0.0105855	0.00116812	0.118092	0.0534557	0.0407575
150.017	0.0551549	0.12389	0.16319	0.0677757	0.100943	0.0756526	0.100062	0.179067	0.0943512	0.148564	0.129375	0.089621	0.0669139	0.139518	0.102138	0.0804005	0.0562505	0.0788607	0.101454	0.0769275	0.107626	0.0791352	0.028972	-0.0193147	0.0514867	0.106122	0.0514867	0.116672	0.0605972	0.126907	0.0698114	0.0541161	0.0644099	0.0576991	0.078999	0.0604923	0.0589804	0.019702	0.0870476	0.0373941	0.0708454
151.027	0.0467915	0.113875	0.15247	0.0661705	0.105785	0.0611261	0.127727	0.16768	0.0727629	0.182937	0.0927689	0.096609	0.059323	0.0701263	0.0969781	0.0737579	0.0811025	0.0961441	0.129631	0.0832721	0.104691	0.0705523	0.0460173	0.0197288	0.055126	0.0657849	0.055126	0.140886	0.0828881	0.147763	0.0743041	0.0139981	0.0793414	0.0375745	0.0811748	0.111969	0.0843197	0.0175744	0.131183	0.048835	0.0595125
152.043	0.0474902	0.0912631	0.159033	0.0727454	0.125898	0.0727775	0.0872305	0.195514	0.103603	0.197868	0.107352	0.0750223	0.0605396	0.112084	0.112235	0.0488772	0.0395084	0.0728817	0.110236	0.0498302	0.0681711	0.0254673	0.0323196	-0.0301144	0.117779	0.116582	0.117779	0.0428029	0.0514816	0.106899	0.0369638	0.0300874	0.077298	0.0326382	0.111657	0.0459925	0.0368419	0.00232044	0.0984866	0.0116071	0.047364
153.051	0.0776683	0.138659	0.128164	0.063352	0.117945	0.0490404	0.120674	0.211389	0.0935529	0.220743	0.0992315	0.0895436	0.0558142	0.0942889	0.118842	0.0234346	0.0864824	0.0592925	0.137148	0.0371568	0.0805821	0.109631	0.0635896	0.00861079	0.013678	0.151923	0.013678	0.0575402	0.0577078	0.160256	0.0309129	0.0529133	0.0488771	0.00254847	0.120696	0.0497197	0.121841	0.00490491	0.181908	0.128209	0.0663759
154.083	0.0498107	0.15149	0.107069	0.066103	0.0805258	0.0484169	0.159481	0.112136	0.0688173	0.204775	0.0907718	0.0847185	0.040256	0.0619291	0.077743	0.0436993	0.0560025	0.0725557	0.0656538	0.0497333	0.0943575	0.0722871	0.011612	0.0358901	0.0126831	0.128974	0.0126831	0.0945613	0.0726203	0.154214	0.0599977	0.0317172	0.0778327	0.0393262	0.112869	0.0856327	0.0458318	0.00674384	0.117215	0.0380389	0.0405344
155.103	0.0603595	0.185421	0.113739	0.105007	0.134275	0.0573816	0.125687	0.160261	0.0605417	0.171426	0.140161	0.099005	0.0805303	0.10809	0.108356	0.0538546	0.0480647	0.0719848	0.0849501	0.0521771	0.0945885	0.0769538	0.0228994	-0.0649801	0.0648103	0.107506	0.0648103	0.140355	0.107351	0.118085	0.110724	0.0495988	0.0936721	0.0666008	0.145823	0.0894103	0.0813287	0.0116109	0.116731	0.0377072	0.0187066
156.114	0.0314759	0.121834	0.130647	0.112187	0.0827656	0.08044	0.0969007	0.162225	0.0850119	0.181935	0.146064	0.107498	0.0552744	0.125614	0.101435	0.0472846	0.0575198	0.0863055	0.151781	0.0660896	0.0939847	0.133852	0.125179	0.181879	0.14083	0.157728	0.14083	0.129044	0.0724862	0.137692	0.106079	0.0631386	0.086672	0.0134767	0.112536	0.0838841	0.037942	0.0182428	0.113026	0.0191847	0.0335726
157.123	0.0609755	0.152682	0.153248	0.0757778	0.12716	0.058921	0.122526	0.157908	0.0770179	0.252631	0.106928	0.0987933	0.0743505	0.12862	0.128032	0.030481	0.0498227	0.0734391	0.0873005	0.058681	0.0797302	0.0761723	0.0457386	0.04213	0.0742969	0.121063	0.0742969	0.154192	0.105548	0.137359	0.0569246	0.010511	0.0990538	0.0295325	0.0709229	0.0662788	0.0943837	0.00695034	0.152924	0.0136123	0.0518587
158.143	0.0560442	0.135204	0.160458	0.0530324	0.0887488	0.0736455	0.131163	0.173545	0.102029	0.213194	0.133918	0.0645005	0.0928526	0.146307	0.111755	0.0362984	0.0533453	0.0733835	0.0866572	0.0740265	0.110345	0.0854821	0.0706447	0.0287701	0.0745249	0.226037	0.0745249	0.0969149	0.110334	0.119942	0.095206	0.0194897	0.0803096	-0.00292412	0.0757615	0.0650715	0.0702583	-0.00133801	0.136855	0.0549586	0.0946815
159.153	0.0373154	0.116161	0.13243	0.0509099	0.0843324	0.0784616	0.17237	0.207916	0.109281	0.281124	0.142513	0.11708	0.0771811	0.117446	0.110026	0.0522543	0.0567342	0.0689655	0.0838619	0.0448889	0.0743346	0.0570189	0.0929335	0.0389511	0.0474264	0.118595	0.0474264	0.140147	0.090063	0.153508	0.114414	0.0270559	0.0771059	-0.0148325	0.102607	0.0777413	0.0894371	0.0109246	0.1161	0.0228537	0.0332346
160.17	0.0475392	0.187303	0.157193	0.0732245	0.102442	0.0612959	0.11128	0.183802	0.0819783	0.184798	0.106872	0.0844371	0.0566521	0.0928467	0.112061	0.0811732	0.0611395	0.0633194	0.0847088	0.0602991	0.104961	0.0604273	0.00476119	0.0594383	0.0642337	0.136818	0.0642337	0.0885739	0.0867006	0.115059	0.0813764	0.0455666	0.0937074	0.0356481	0.0888189	0.0751416	0.078324	0.0314707	0.143254	0.0305571	0.030373
161.19	0.0398535	0.14255	0.128315	0.105488	0.107747	0.0743762	0.151363	0.118525	0.0736306	0.176217	0.0944869	0.0874788	0.0742665	0.0880117	0.0800507	0.0720507	0.0687436	0.0673566	0.0999987	0.0713023	0.131309	0.00985106	0.00904846	-0.000920864	0.182465	0.164109	0.182465	0.149011	0.107953	0.183038	0.0769372	0.0134663	0.0644472	0.0357081	0.120979	0.0364566	0.0607445	0.00675317	0.186061	0.0648717	0.0858789
162.19	0.0363717	0.128959	0.142362	0.10603	0.126294	0.0498894	0.159879	0.198489	0.0905103	0.203883	0.10778	0.132124	0.0882769	0.0847827	0.117722	0.076507	0.0635857	0.093044	0.0516634	0.0576526	0.0904304	0.0915151	0.0491961	0.130069	0.104697	0.119188	0.104697	0.121415	0.06891	0.158061	0.0793572	0.0523065	0.0651516	0.0320313	0.0950706	0.042436	0.0561587	0.0083685	0.143699	0.029389	0.0404888
163.213	0.0721538	0.104445	0.159631	0.0765683	0.132279	0.082035	0.128611	0.218717	0.0801617	0.200993	0.0984402	0.0800618	0.077886	0.089431	0.0945831	0.0461046	0.0272659	0.0533774	0.106364	0.0651792	0.0867273	0.0844029	-0.0031973	0.0240092	0.10427	0.151799	0.10427	0.116406	0.107381	0.170471	0.0953337	0.0541731	0.0973652	0.0395957	0.0925705	0.0782465	0.0661806	0.0134834	0.114379	0.0677225	0.0230526
164.224	0.0467047	0.145447	0.121548	0.0382191	0.121809	0.0836789	0.131041	0.0941437	0.0860325	0.200791	0.132171	0.103985	0.064183	0.122864	0.122605	0.054403	0.0836832	0.0819973	0.0836355	0.0570004	0.0807116	0.0636268	0.00279784	-0.0839504	0.138968	0.0928079	0.138968	0.13355	0.123621	0.185972	0.0915726	0.0434595	0.0965411	0.0343963	0.0766997	0.10261	0.0610838	0.0158171	0.144303	0.0218929	0.0593671
165.262	0.0606319	0.151463	0.130107	0.128867	0.100578	0.0874427	0.115809	0.208515	0.0987874	0.219863	0.132584	0.0773346	0.042205	0.121457	0.0956769	0.0500971	0.0218215	0.0623584	0.114176	0.0693406	0.101822	0.102324	0.0719673	0.0924957	0.140974	0.125249	0.140974	0.142096	0.13624	0.151592	0.0892621	0.046785	0.112551	0.0172896	0.0761293	0.0701962	0.0714299	0.0141845	0.18027	0.0572289	0.0284103
166.281	0.0562243	0.102317	0.156945	0.134598	0.118483	0.0748973	0.139236	0.199168	0.0793081	0.198519	0.138977	0.0987444	0.0471356	0.107204	0.103863	0.0694179	0.0742723	0.0862772	0.131726	0.0635619	0.137283	0.126173	0.0537288	0.0753282	0.017715	0.140143	0.017715	0.106421	0.0683984	0.16886	0.131195	0.0433655	0.0837426	0.00360177	0.0431848	0.0350404	-0.00192881	-0.00454102	0.132724	0.0398514	0.0082124
167.292	0.0612445	0.147086	0.224466	0.0841126	0.123272	0.0762157	0.116263	0.242903	0.07861	0.251808	0.0920813	0.081003	0.063369	0.115671	0.0778121	0.0679041	0.0314737	0.057976	0.0755146	0.0195311	0.057269	0.0457256	0.020477	0.0212504	0.163253	0.0886364	0.163253	0.154115	0.0797003	0.164303	0.116187	0.0741756	0.0763261	0.0535478	0.0913543	0.0756519	-0.000321768	0.00713542	0.128266	0.0389716	0.073419
168.312	0.0557707	0.133085	0.166608	0.0661739	0.0993871	0.0712829	0.0887707	0.210912	0.0540995	0.203587	0.150751	0.0883096	0.0480489	0.105397	0.111008	0.0272437	0.0637085	0.0704209	0.0978657	0.0690786	0.139095	0.0838376	0.06161	0.0188132	0.0890787	0.0880557	0.0890787	0.164031	0.168276	0.204597	0.172017	0.0398528	0.068558	0.0517053	0.0861795	0.0676267	0.0419089	-0.0020296	0.177809	0.0272285	0.0544548
169.338	0.089021	0.158757	0.140958	0.0781875	0.0952379	0.055025	0.0840746	0.128804	0.0943585	0.170958	0.113945	0.107513	0.0535088	0.123289	0.113518	0.071161	0.040962	0.0872623	0.0675667	0.0603348	0.118111	0.083393	0.0664836	0.0513511	0.0234434	0.178326	0.0234434	0.112774	0.0864956	0.163326	0.0823619	0.04318	0.0845051	0.00591533	0.103567	0.0835625	0.0549748	0.0014388	0.101428	0.0635564	0.0408533
170.342	0.0355429	0.16775	0.185974	0.0643526	0.16258	0.0385011	0.135873	0.230315	0.0769195	0.178243	0.0840733	0.104607	0.0752083	0.140605	0.12517	0.0427634	0.076491	0.0955274	0.0720994	0.0538021	0.0993554	0.0441852	0.0451142	0.0943162	0.0808397	0.099627	0.0808397	0.116344	0.0620999	0.174621	0.102596	0.0497274	0.0862164	0.061001	0.0891982	0.0597942	0.045913	0.00307789	0.0799073	0.0569191	0.00163855
171.352	0.0391652	0.12592	0.143642	0.0530178	0.0746606	0.0520117	0.144603	0.155247	0.0974428	0.174901	0.121147	0.101589	0.0773178	0.0824004	0.156986	0.0813848	0.0577499	0.0871837	0.0505802	0.0661416	0.0932943	0.0604935	-0.00354399	0.0624877	0.0393158	0.0997119	0.0393158	0.113235	0.068168	0.137996	0.074144	0.0253761	0.0897178	0.0208525	0.122266	0.0288054	0.0139679	-0.00696265	0.308902	0.0921733	0.0531177
172.362	0.0546198	0.102978	0.125343	0.0878805	0.113717	0.0391758	0.138243	0.106357	0.0890997	0.199277	0.111369	0.0859518	0.0667503	0.122319	0.120226	0.0417145	0.0421548	0.0685196	0.0631862	0.057798	0.110185	0.097401	0.187472	0.222795	0.0819171	0.148143	0.0819171	0.162913	0.140966	0.165611	0.117372	0.0245324	0.104696	0.0240271	0.146875	0.122299	0.0386459	0.0335037	0.13186	0.0823989	0.0608971
173.385	0.0168905	0.161323	0.156623	0.146	0.11954	0.0639144	0.0708011	0.155502	0.0580499	0.208402	0.149266	0.0814597	0.0460026	0.0976191	0.088847	0.0533701	0.0429044	0.0821089	0.0924178	0.0678866	0.0458984	0.0869802	0.144311	0.164113	0.0178207	0.0814878	0.0178207	0.143428	0.0948227	0.14421	0.0824991	0.0392224	0.0772159	0.0376463	0.103537	0.0980115	0.0415095	0.0258284	0.177884	0.0966151	0.0997177
174.399	0.00764277	0.174528	0.161787	0.0967768	0.112516	0.0677564	0.14616	0.161691	0.0796839	0.201542	0.114063	0.0813166	0.0709103	0.130053	0.135418	0.0473974	0.0774596	0.0588586	0.0673597	0.0577666	0.106703	0.132566	0.0830116	0.018566	0.0412487	0.100164	0.0412487	0.162063	0.0827452	0.154247	0.110047	0.0673366	0.0940936	0.0303729	0.0995382	0.0924015	0.0563771	0.0196203	0.175851	0.0769146	0.113841
175.405	0.036209	0.116622	0.136025	0.0738232	0.0962184	0.081553	0.0995177	0.20651	0.0686174	0.266837	0.145511	0.0987333	0.088684	0.167781	0.131638	0.0534332	0.0795132	0.0789996	0.0915086	0.0993436	0.096524	0.0506338	0.027127	-0.0206153	0.0533703	0.24924	0.0533703	0.0478142	0.0290445	0.135146	0.0577937	0.058372	0.0963392	0.0154284	0.112404	0.0947396	0.0469626	0.00304039	0.225125	0.0648304	0.0543809
176.428	0.0328571	0.14197	0.156544	0.109677	0.0642172	0.0708881	0.124441	0.204658	0.0813964	0.288949	0.102865	0.0949582	0.0787975	0.107801	0.113466	0.0674129	0.0742344	0.0631877	0.0876144	0.039317	0.0626689	0.0788526	-0.00998782	-0.0101624	0.0749281	0.163158	0.0749281	0.15587	0.079238	0.186075	0.20709	0.0604171	0.0982141	0.0461889	0.0789586	0.0421515	0.0777814	0.0249113	0.18302	0.0399896	0.120818
177.439	0.0454	0.170928	0.154128	0.120236	0.15311	0.0609344	0.118961	0.159747	0.0619776	0.229811	0.126946	0.109762	0.0750867	0.133785	0.144176	0.0364921	0.0545891	0.0814576	0.0695588	0.0695611	0.169094	0.0803752	0.1058	-0.0115787	-0.00556273	0.127849	-0.00556273	0.174405	0.0666675	0.149721	0.0926082	0.0567884	0.0876196	0.0368918	0.122085	0.0784709	0.00457771	0.00152422	0.152754	0.0589747	0.0405421
178.459	0.0723832	0.110944	0.155141	0.0117957	0.106472	0.0474724	0.104993	0.209169	0.0859162	0.212159	0.139186	0.107603	0.0617907	0.15243	0.126424	0.0492282	0.0809941	0.075045	0.0774519	0.0698992	0.146933	0.0500006	0.139806	0.0267021	0.0406528	0.106153	0.0406528	0.10877	0.0715816	0.195129	0.0675029	0.0209439	0.138407	0.00563163	0.0864736	0.0815145	0.0613699	0.0163059	0.171347	0.0237242	0.0567205
179.468	0.036299	0.107487	0.135095	0.0596211	0.135569	0.0662345	0.124138	0.15162	0.0660646	0.284609	0.165342	0.107384	0.0828242	0.167371	0.129123	0.0542712	0.058041	0.0879716	0.122519	0.0957874	0.0930112	0.107222	0.0761308	0.0864156	0.0643196	0.136734	0.0643196	0.0963163	0.0752918	0.112598	0.0840953	0.054338	0.112694	0.0346497	0.0934796	0.106008	0.074888	0.022441	0.161813	0.0235406	0.0303005
180.498	0.0394014	0.0983648	0.169933	0.0775949	0.116264	0.0576019	0.144311	0.182078	0.0698651	0.223541	0.144644	0.083706	0.0332008	0.113396	0.128494	0.0611462	0.0397807	0.116082	0.0498457	0.070729	0.137428	0.100653	0.0864725	-0.0111987	-0.0565221	0.115207	-0.0565221	0.137108	0.0986315	0.158966	0.114222	0.0777143	0.112188	-0.000813159	0.0839232	0.0673467	0.0725622	0.0106388	0.167254	0.0832519	0.0207144
181.572	0.0586193	0.10579	0.152037	0.0974689	0.0885322	0.0661805	0.140304	0.187088	0.0879992	0.229757	0.108283	0.111024	0.0799727	0.106563	0.10115	0.0289148	0.0208299	0.056741	0.0505549	0.0735336	0.102936	0.0716102	0.138514	0.117688	0.159272	0.208168	0.159272	0.169763	0.0491279	0.153765	0.0807444	0.044571	0.077785	6.77513e-05	0.0887142	0.0935306	0.0355447	0.00470297	0.155068	0.0601632	0.0225071
182.595	0.105674	0.140231	0.159554	0.0663019	0.103361	0.0638231	0.139278	0.220704	0.0966154	0.226157	0.134297	0.108368	0.056546	0.11174	0.125968	0.0730559	0.057535	0.0884599	0.115062	0.0801713	0.0864343	0.0536742	0.0753549	-0.0315335	0.0398314	0.112134	0.0398314	0.141417	0.0755136	0.179262	0.128081	0.0358249	0.0786098	0.0144761	0.110549	0.0893548	0.0834487	0.0157681	0.174496	0.0934259	0.0398743
183.602	0.0469075	0.105775	0.157709	0.133907	0.112597	0.0527504	0.136546	0.171406	0.0958508	0.269319	0.12458	0.106414	0.0679984	0.123463	0.111013	0.0554883	0.0342298	0.0737374	0.0786874	0.0585946	0.125076	0.0634824	0.0956388	0.0202647	0.0689535	0.0814417	0.0689535	0.158387	0.0648172	0.167873	0.0871654	0.0413397	0.0906727	0.0184568	0.101495	0.102947	0.103872	-0.00243867	0.170342	0.0635875	0.0193432
184.612	0.07306	0.158807	0.122681	0.0912153	0.0990302	0.0507884	0.137386	0.0773991	0.100904	0.208833	0.136411	0.0972247	0.0867135	0.156482	0.144274	0.0846872	0.0672695	0.0903347	0.0989452	0.0716728	0.075559	0.0607427	0.0354328	-0.0125956	0.054927	0.134414	0.054927	0.184249	0.0659731	0.165412	0.095977	0.0426024	0.0931023	0.0351419	0.0860744	0.134947	0.04083	-0.00272982	0.1438	0.0681367	0.0290786
185.632	0.0453741	0.117966	0.140256	0.0898681	0.12418	0.0562778	0.104826	0.168493	0.0829242	0.228184	0.159908	0.0903272	0.0560989	0.113301	0.0815608	0.0776845	0.0544529	0.0801077	0.0465293	0.0482407	0.0763156	0.0624985	0.0214687	0.0607346	0.0882359	0.165344	0.0882359	0.127827	0.0655229	0.151083	0.111458	0.0534422	0.116191	0.0298772	0.108711	0.0731871	0.0643668	0.00807226	0.154263	0.0293591	0.0564188
186.636	0.0566468	0.134301	0.175557	0.0696236	0.129512	0.0453807	0.125215	0.182634	0.078304	0.234024	0.116041	0.0824064	0.0452592	0.128873	0.108342	0.0511154	0.0373715	0.0784144	0.124742	0.0752288	0.16479	0.0705823	0.0864181	0.0495026	0.0255122	0.124182	0.0255122	0.200115	0.111205	0.191249	0.121486	0.0326366	0.104185	0.0293057	0.0842288	-0.00037045	0.0258862	-0.0185541	0.230935	0.0219619	0.0193658
187.652	0.0704798	0.124618	0.183865	0.0550548	0.116698	0.0498692	0.115104	0.244268	0.0892139	0.21781	0.125374	0.0700683	0.0682153	0.149316	0.114529	0.0859262	0.0549209	0.0676269	0.068773	0.0625431	0.0953478	0.0757121	0.0897624	0.0433745	0.0448906	0.120734	0.0448906	0.147827	0.0814512	0.16458	0.0813007	0.0553083	0.098721	0.026707	0.100424	0.0875068	0.0806498	0.0162378	0.230186	0.0478246	0.0308509
188.671	0.0549175	0.131185	0.1604	0.0923779	0.119635	0.0963503	0.112136	0.133591	0.0893642	0.212607	0.131183	0.0932153	0.0635855	0.132889	0.0737833	0.0816493	0.0747859	0.0776225	0.0391489	0.0690421	0.13003	0.118604	0.0560194	0.0660351	0.131065	0.125733	0.131065	0.10019	0.0913535	0.13949	0.0821758	0.0603472	0.101798	0.0464386	0.124199	0.0817301	0.0736288	0.000203534	0.114744	0.0784094	0.0364628
189.696	0.0542484	0.125714	0.151706	0.101415	0.102039	0.0880319	0.11763	0.184591	0.0938559	0.180297	0.0804871	0.0667388	0.0680755	0.120657	0.0916487	0.0567845	0.0231793	0.0606352	0.0999228	0.0443932	0.0629165	0.0817094	0.114957	0.103797	0.0112725	0.130126	0.0112725	0.121581	0.0718781	0.153278	0.0336402	0.0687481	0.0965807	0.0357877	0.0901735	0.0292451	0.0382673	0.00916001	0.098102	0.0625307	0.0119107
190.705	0.0494419	0.106289	0.14201	0.0746399	0.109875	0.0383284	0.192991	0.153552	0.073473	0.230132	0.147379	0.094778	0.0593216	0.118878	0.115253	0.0741635	0.0389268	0.0866037	0.108998	0.0731286	0.0814063	0.0793898	0.101576	0.149333	0.0845244	0.146052	0.0845244	0.14589	0.106713	0.150066	0.103871	0.0489352	0.0843176	0.00517835	0.0627477	0.0777068	0.0631532	0.0150698	0.184281	0.0729364	-0.0063639
191.713	0.0621589	0.145298	0.151776	0.107848	0.117399	0.0578622	0.102089	0.174508	0.0686151	0.238274	0.107282	0.0906338	0.0727291	0.0958078	0.0977626	0.026079	0.0229983	0.0745308	0.0878293	0.0556109	0.0983039	0.0775742	0.0705573	0.0052599	0.0788931	0.214122	0.0788931	0.149353	0.0853985	0.181023	0.146477	0.0826049	0.130368	0.0214281	0.0950998	0.0682349	0.0485506	0.00654021	0.203899	0.113729	0.0397501
192.722	0.0685254	0.118392	0.129719	0.084516	0.169663	0.0568528	0.0742324	0.0998107	0.0795395	0.174205	0.122085	0.0649262	0.0717381	0.115221	0.0957757	0.0725439	0.0472552	0.0819742	0.124437	0.061445	0.108331	0.0883901	0.126127	-0.0155779	0.120016	0.128785	0.120016	0.0768995	0.0733391	0.143924	0.0623637	0.0519419	0.0892791	0.0187954	0.0611867	0.0462906	0.0230767	0.000979744	0.108608	0.0368239	-0.0189218
193.733	0.0425485	0.134305	0.133587	0.104607	0.100775	0.108286	0.12796	0.170945	0.087621	0.231557	0.121016	0.098616	0.0505375	0.10213	0.0996678	0.0842805	0.0340271	0.0929664	0.0983023	0.0603772	0.131819	0.0723658	0.0759454	0.0432691	0.0713531	0.175185	0.0713531	0.184109	0.0942383	0.127936	0.0661673	0.0726849	0.0662066	0.0569344	0.0951679	0.0579751	0.0100278	-0.0187946	0.153234	0.0915146	0.066274
194.752	0.0972921	0.107275	0.125785	0.0685427	0.169605	0.0524362	0.134734	0.254833	0.098856	0.252479	0.150814	0.0864951	0.0985543	0.181196	0.106746	0.0789119	0.0583779	0.101921	0.0733399	0.0684142	0.0797423	0.102254	0.104834	0.0619144	0.0141962	0.124012	0.0141962	0.118443	0.0846206	0.11568	0.0414858	0.056937	0.128882	0.00627397	0.0560869	0.101311	0.0434887	-0.00335954	0.17592	0.0690981	0.0178193
195.762	0.0251679	0.148067	0.124294	0.0570862	0.119129	0.0848238	0.131162	0.134817	0.0878996	0.175262	0.087601	0.0582712	0.0777133	0.16461	0.101041	0.0634214	0.0552888	0.072428	0.0402433	0.0169801	0.0411921	0.0748635	0.0681842	-0.0194215	0.137238	0.187929	0.137238	0.156867	0.106248	0.111528	0.0965792	0.0373762	0.0820565	0.0298757	0.0983584	0.0256661	0.0281295	-0.0054148	0.168818	0.0412431	0.0748953
196.792	0.0494192	0.168343	0.119568	0.10627	0.135253	0.0624621	0.117124	0.124083	0.0864811	0.21949	0.101948	0.100092	0.0493732	0.122229	0.0954748	0.0819998	0.0678195	0.0503481	0.0853383	0.0600323	0.11663	0.0996369	0.0984792	0.00550431	0.0628189	0.21876	0.0628189	0.116506	0.0584129	0.173197	0.116092	0.0674335	0.0744749	0.0350758	0.0987761	0.0336779	0.0318877	0.00801503	0.129569	0.046445	0.0250396
197.815	0.101221	0.144413	0.125591	0.0515094	0.110056	0.0898987	0.166719	0.153307	0.084626	0.21412	0.09595	0.0672964	0.0689194	0.130652	0.116016	0.0485912	0.067898	0.0671217	0.116109	0.0726358	0.112468	0.0997568	0.0857903	0.0268491	0.0410372	0.143182	0.0410372	0.121866	0.114722	0.148672	0.0819707	0.051501	0.0908439	0.040416	0.0450851	0.0471287	0.0127378	-0.0100862	0.106854	0.0211426	0.0305762
198.835	0.072273	0.167485	0.120794	0.0602738	0.14292	0.0960938	0.0924424	0.145535	0.0754818	0.203097	0.156278	0.114528	0.0776506	0.133426	0.114418	0.0851122	0.0457499	0.0759115	0.111183	0.0645998	0.0579877	0.0608552	0.0879874	0.00406854	0.0568413	0.154577	0.0568413	0.198146	0.0902233	0.178103	0.177857	0.0618343	0.0864702	0.0293143	0.0920914	0.0986584	0.0828945	0.0143943	0.181753	0.116306	0.0366344
199.844	0.0637857	0.147141	0.123625	0.0598541	0.124956	0.0773797	0.139668	0.0920072	0.123889	0.246012	0.129486	0.0844498	0.0807755	0.136353	0.101638	0.0946307	0.056393	0.0531195	0.114711	0.105992	0.0938716	0.120367	0.136412	0.0500245	0.1039	0.147992	0.1039	0.145996	0.107625	0.172758	0.0387099	0.0276558	0.0884855	0.00611544	0.0860415	0.095409	0.0344247	0.0178395	0.129548	0.0657914	0.0153235
200.855	0.0733098	0.151882	0.113698	0.136083	0.10973	0.0576062	0.139978	0.147879	0.0707123	0.213423	0.105459	0.10173	0.0859561	0.101192	0.0611845	0.0637645	0.0438091	0.0789733	0.114816	0.0815844	0.0976368	0.0841062	0.0726826	-0.0128745	0.0502042	0.0895138	0.0502042	0.0525711	0.0806138	0.188299	0.0861224	0.0624469	0.115	0.0357035	0.134195	0.0610726	0.0441568	0.0239177	0.156263	0.0606512	0.037455
201.861	0.0357055	0.150011	0.095149	0.126408	0.136504	0.113083	0.110553	0.112719	0.0868443	0.246428	0.13811	0.0938451	0.0957831	0.157969	0.128157	0.0669523	0.0803756	0.0746892	0.0233889	0.0702123	0.0837557	0.148089	0.0955665	0.0217455	-0.0100792	0.0815275	-0.0100792	0.198752	0.103866	0.210967	0.139231	0.0887041	0.094917	0.0800436	0.0840098	0.062289	0.0353375	0.00730224	0.141687	0.0279877	-0.00157087
202.894	0.0517683	0.17132	0.156676	0.0896828	0.171919	0.0845014	0.079728	0.125734	0.0750375	0.235914	0.14241	0.0988416	0.0981647	0.131955	0.117734	0.0970589	0.0465683	0.0752871	0.0691731	0.054108	0.0704271	0.0896962	0.115373	0.0443901	0.0377001	0.134727	0.0377001	0.120259	0.0872951	0.141985	0.0430386	0.0481649	0.110593	0.0168438	0.0980739	0.0785307	0.0268352	-0.0014551	0.137571	0.0233421	0.0320155
203.891	0.080116	0.189306	0.107471	0.127857	0.112474	0.0466788	0.118255	0.234511	0.0621774	0.256623	0.134068	0.121272	0.102133	0.140549	0.119223	0.0783677	0.0545713	0.0902999	0.0971774	0.0788393	0.116378	0.10952	0.0916443	0.0527211	0.0387442	0.141984	0.0387442	0.128758	0.0992237	0.166073	0.0802217	0.06274	0.080112	0.0121131	0.0863634	0.0635461	0.0715546	0.0106416	0.171979	0.0439519	0.0633871
204.905	0.0286099	0.16929	0.115106	0.0916738	0.13166	0.0615616	0.105548	0.192026	0.0810468	0.228348	0.155138	0.104537	0.0797046	0.149444	0.109151	0.0756952	0.0450521	0.0825841	0.105986	0.090168	0.130383	0.152726	0.151746	0.169654	0.0935001	0.237316	0.0935001	0.121832	0.0987074	0.1949	0.104022	0.0524152	0.0927802	0.0432769	0.1348	0.0891412	0.0512064	-0.00927359	0.165699	0.0613651	-0.00830801
205.925	0.0514689	0.147729	0.119473	0.0630442	0.136844	0.0864226	0.109696	0.179552	0.0899616	0.26646	0.175718	0.0921126	0.0611785	0.112067	0.112196	0.0560814	0.0807268	0.0492706	0.0448238	0.0705146	0.103904	0.0842983	0.142958	0.0798196	0.0231585	0.146897	0.0231585	0.148844	0.0909581	0.142919	0.0650387	0.0623119	0.081794	0.0464769	0.0783791	0.104187	0.0225836	0.0273439	0.182965	0.0646509	0.0406983
206.954	0.0749618	0.135171	0.156464	0.0964859	0.0981031	0.092399	0.133758	0.114857	0.135482	0.23322	0.148727	0.0762917	0.10619	0.135454	0.136615	0.113027	0.0752549	0.0903364	0.0821744	0.0456097	0.0655026	0.100852	0.0928919	0.00282467	0.14498	0.220178	0.14498	0.15458	0.123862	0.175421	0.132626	0.0453437	0.0969101	0.0195435	0.0965857	0.101226	0.0729036	0.000242128	0.181473	0.0788667	0.0321019
207.974	0.0581773	0.173812	0.121934	0.101762	0.120067	0.0500052	0.109307	0.117497	0.0957328	0.297046	0.170852	0.12006	0.0765904	0.146616	0.113595	0.0737623	0.0285183	0.0586679	0.0771136	0.0852142	0.10932	0.0901334	0.190157	-0.000658667	0.105469	0.1692	0.105469	0.144641	0.113483	0.175509	0.0893599	0.0505126	0.111658	0.0450489	0.100218	0.0879229	0.0634581	-0.0075025	0.174548	0.044641	0.0128623
208.984	0.077676	0.1964	0.115028	0.11988	0.148002	0.0585351	0.143353	0.125091	0.083682	0.2281	0.18992	0.0863205	0.0856781	0.137176	0.0719005	0.0782847	0.029062	0.0806097	0.10971	0.0829698	0.126384	0.0736795	0.0641341	0.0283937	0.0357197	0.140697	0.0357197	0.0947745	0.0805116	0.171042	0.0891595	0.0726861	0.0901887	0.0659891	0.0934195	0.10587	0.0569039	0.0122043	0.128021	0.0502256	0.0201599
209.994	0.0506141	0.190522	0.150594	0.10507	0.0859593	0.060267	0.121919	0.153163	0.0941993	0.257179	0.128734	0.0892589	0.0963882	0.163716	0.109179	0.0518413	0.0384862	0.102343	0.108628	0.0643908	0.119372	0.0707579	0.0752498	0.0352863	0.0356376	0.158979	0.0356376	0.1422	0.0398285	0.185818	0.0643238	0.0336576	0.0943641	0.0366934	0.0979927	0.102678	0.0674632	0.0168394	0.148595	0.104625	0.00963147
211.013	0.0581384	0.153587	0.105643	0.130139	0.139639	0.0769812	0.160495	0.16755	0.0878136	0.240857	0.14262	0.103736	0.0691812	0.106422	0.0985401	0.0686878	0.0289845	0.0944565	0.0702736	0.0912569	0.061621	0.118498	0.0966504	-0.0194153	0.000407552	0.163087	0.000407552	0.0997548	0.0492175	0.149016	0.0761536	0.0729828	0.0921075	0.0518913	0.0967605	0.0791521	0.0547106	0.000768898	0.207904	0.0618952	0.0377923
212.014	0.0870981	0.115902	0.119169	0.0926165	0.161781	0.0648181	0.13339	0.157256	0.0722048	0.198653	0.106626	0.0779588	0.0872582	0.089253	0.140339	0.0696317	0.0720062	0.0704302	0.0998726	0.0771523	0.0931574	0.0654955	0.139607	0.0220242	0.105009	0.0905561	0.105009	0.120436	0.0689437	0.191647	0.0533132	0.0545466	0.110426	0.114917	0.0796268	0.0857094	0.040902	0.018251	0.217908	0.116428	0.0208258
213.036	0.064452	0.130132	0.124238	0.0962848	0.171324	0.0472529	0.100065	0.184975	0.0725045	0.192851	0.151974	0.108076	0.0758801	0.101841	0.104278	0.0822187	0.0890537	0.079512	0.095286	0.0675146	0.0825418	0.0464944	0.166324	0.0401422	0.104412	0.133807	0.104412	0.204543	0.108968	0.199906	0.0575415	0.0595433	0.0850264	0.0679371	0.104789	0.0763565	0.00128997	-0.000635206	0.151193	0.0768698	0.0340952
214.047	0.0740986	0.15367	0.0933588	0.0720789	0.130904	0.0759558	0.0703181	0.189408	0.0888272	0.217507	0.146036	0.0931465	0.0728151	0.14666	0.142253	0.0857096	0.0579261	0.0905318	0.154131	0.0514715	0.0675084	0.130775	0.164541	0.118468	0.115559	0.250426	0.115559	0.132956	0.114078	0.160354	0.0997284	0.0436075	0.0953124	0.0431131	0.109039	0.0927911	0.0697256	0.0123588	0.198878	0.0783186	0.0664205
215.07	0.071804	0.2043	0.134554	0.0597058	0.116483	0.0575053	0.124579	0.133167	0.116512	0.243742	0.141067	0.0835362	0.101553	0.138493	0.135087	0.0579787	0.00147781	0.0653058	0.077412	0.0746149	0.0359304	0.101414	0.114018	0.0382348	0.0578921	0.148199	0.0578921	0.119612	0.0890621	0.186543	0.0964567	0.0592981	0.112076	0.0515048	0.117296	0.10509	0.0698713	0.016012	0.203852	0.0138547	0.0251693
216.073	0.0234014	0.146525	0.143978	0.100231	0.151833	0.105138	0.108769	0.0995864	0.0868532	0.254856	0.181673	0.106278	0.0972596	0.188201	0.14082	0.0841681	0.0582042	0.0712772	0.0603412	0.0801817	0.0855299	0.0958547	0.124471	0.0600942	0.0647301	0.158602	0.0647301	0.174976	0.104072	0.183654	0.12505	0.0525784	0.0853305	0.0487838	0.0989906	0.110857	0.0334928	0.0250852	0.229799	0.067821	0.0674709
217.09	0.070164	0.165366	0.129111	0.129684	0.158416	0.0796303	0.139082	0.0999439	0.0728813	0.253049	0.0974806	0.103503	0.0911078	0.13648	0.122906	0.0552179	0.058865	0.0846963	0.107039	0.0582774	0.0937794	0.108654	0.0949916	0.0832718	0.0125359	0.202755	0.0125359	0.197339	0.154468	0.173294	0.151803	0.0408703	0.0663384	0.0268009	0.106015	0.0641006	0.0571544	0.0280095	0.108051	0.0227206	0.0302593
218.123	0.0757943	0.143431	0.13432	0.153371	0.120602	0.0397016	0.0921172	0.0504663	0.0828944	0.302271	0.166824	0.0993397	0.096365	0.109267	0.114002	0.0616371	0.0244907	0.0640262	0.0403946	0.0710006	0.0640885	0.0649023	0.0819114	-0.0586382	0.105298	0.206719	0.105298	0.140958	0.100678	0.202218	0.0938235	0.0375213	0.110647	0.0567824	0.0863665	0.116836	0.0314446	0.0158244	0.173696	0.0603598	0.00975303
219.143	0.0645301	0.161452	0.139721	0.0749846	0.126216	0.0433815	0.185799	0.157783	0.0914838	0.268828	0.173638	0.0765157	0.0581883	0.09363	0.0798153	0.111609	0.0756585	0.075027	0.0941174	0.0819183	0.11086	0.130241	0.0974575	0.0185103	0.0544432	0.224226	0.0544432	0.116389	0.0713716	0.179135	0.0951882	0.0912747	0.0996876	0.0322688	0.112392	0.123617	0.0820768	0.0241298	0.130378	0.0687049	0.0104357
220.143	0.0634165	0.142491	0.141268	0.047199	0.125349	0.065355	0.115891	0.246248	0.115218	0.236825	0.153792	0.0724081	0.0899192	0.116464	0.117574	0.11644	0.0996768	0.0841426	0.0798721	0.0863686	0.120757	0.0822094	0.0390618	-0.0102964	0.226709	0.239044	0.226709	0.132706	0.0819871	0.130241	0.0438034	0.027832	0.0898949	0.0592746	0.122254	0.106923	0.0598179	0.0314478	0.107689	0.0230424	0.0306068
221.163	0.0630537	0.149205	0.126983	0.119631	0.140168	0.0509309	0.107448	0.186777	0.088611	0.273126	0.158959	0.0931015	0.0639828	0.114677	0.130941	0.0808695	0.041443	0.0758225	0.0886921	0.0710644	0.107925	0.0916331	0.0528736	0.128164	0.0734987	0.310583	0.0734987	0.132893	0.054422	0.162024	0.0925628	0.0483537	0.102433	0.0154768	0.102005	0.097533	0.000718447	0.00929664	0.133878	0.066033	0.00942289
222.192	0.0677231	0.1788	0.147843	0.055236	0.156303	0.0474706	0.102653	0.152541	0.127878	0.211137	0.145664	0.0874525	0.0604275	0.150624	0.135086	0.0888761	0.0616549	0.0586152	0.0671621	0.0889056	0.0642613	0.079184	0.108962	0.07977	0.035084	0.135505	0.035084	0.130469	0.107733	0.142811	0.106607	0.0768565	0.0846706	0.0521684	0.100675	0.114186	0.0419112	0.00598136	0.137298	0.0252356	0.0168644
223.209	0.0345836	0.177023	0.145669	0.0910922	0.136332	0.0697611	0.0560406	0.191379	0.0980114	0.265343	0.136391	0.0988739	0.0623407	0.0977427	0.106122	0.0677497	0.0475136	0.0673209	0.0714112	0.109164	0.016536	0.128957	0.193389	0.0209941	0.0357808	0.138091	0.0357808	0.121458	0.12812	0.185067	0.134983	0.0467393	0.0689487	0.0383737	0.0793971	0.0935221	0.0400061	0.000285213	0.219891	0.116505	0.0815911
224.219	0.0906343	0.151745	0.174136	0.101331	0.119709	0.0560049	0.0829431	0.155044	0.109162	0.239843	0.144882	0.0980611	0.0923643	0.123624	0.143589	0.0743418	0.0589017	0.094766	0.057363	0.10876	0.0828683	0.0745351	0.103491	-0.0467767	0.0543363	0.199329	0.0543363	0.169935	0.127588	0.194736	0.114963	0.0815257	0.0897112	0.0354817	0.0936122	0.130526	0.0357106	0.0285837	0.165189	0.0302218	0.0170166
225.248	0.0350591	0.156993	0.142325	0.0885783	0.107128	0.0659229	0.115177	0.181711	0.101141	0.247696	0.158585	0.109057	0.0886826	0.101206	0.116909	0.0701105	0.0256781	0.104584	0.145912	0.0796162	0.0819788	0.0961401	0.0743349	0.0995094	0.104383	0.192196	0.104383	0.172537	0.114697	0.171764	0.0999433	0.0595826	0.0840678	0.024332	0.111208	0.122692	0.045812	0.0206214	0.176587	0.0353471	0.0399656
226.278	0.0837712	0.122551	0.141859	0.156986	0.117171	0.0837304	0.086452	0.135422	0.0827903	0.232327	0.148412	0.0616378	0.0878037	0.151602	0.132079	0.117846	0.0910996	0.0885355	0.135905	0.0909251	0.0572578	0.089359	0.0823824	0.0257586	0.0611412	0.190469	0.0611412	0.113836	0.116651	0.179602	0.0388978	0.040207	0.0899144	0.0751037	0.117773	0.0957274	0.0349423	0.00548862	0.224203	0.0525075	0.0184448
227.301	0.0919664	0.153133	0.121498	0.0819551	0.108261	0.0662527	0.122909	0.189909	0.0944153	0.243887	0.135311	0.0733379	0.0754839	0.137193	0.0834502	0.0727457	0.0505743	0.0923341	0.0897883	0.100332	0.0664363	0.0772251	0.0905348	-0.0408878	0.0379972	0.225935	0.0379972	0.11766	0.0886881	0.159181	0.102385	0.0488797	0.093324	0.0383279	0.119014	0.0643505	0.0704021	0.00470409	0.236077	0.0295428	0.0442295
228.307	0.0557121	0.127258	0.134821	0.0908404	0.147105	0.0942642	0.0905037	0.232692	0.0874707	0.230776	0.126233	0.0790984	0.100703	0.14652	0.118876	0.0803046	0.0238699	0.0887661	0.0673313	0.129193	0.0634267	0.128298	0.0824129	-0.0343519	0.082922	0.0627128	0.082922	0.141393	0.101521	0.183623	0.0667616	0.10425	0.120065	0.0215599	0.108156	0.0994487	0.0427457	0.00333386	0.185316	0.060624	0.0316264
229.318	0.0690038	0.143825	0.135404	0.0875083	0.130259	0.0684794	0.10134	0.162846	0.0859385	0.258539	0.186388	0.126241	0.0902752	0.102566	0.118022	0.0863272	0.0585225	0.0488279	0.0938941	0.138366	0.108535	0.109825	0.109552	-0.0071298	0.135979	0.178886	0.135979	0.134982	0.0880637	0.174136	0.127541	0.0416872	0.0776888	0.0288392	0.120466	0.12905	0.0774596	0.0101602	0.115346	0.0129672	0.00367332
230.361	0.0364507	0.149783	0.136908	0.0687004	0.154936	0.0762871	0.0857917	0.157828	0.107632	0.233594	0.121298	0.0740247	0.0981452	0.142056	0.114779	0.101933	0.0801591	0.0868154	0.123423	0.111039	0.0482963	0.0853454	0.0828388	0.0470185	0.143455	0.0889832	0.143455	0.19405	0.0865	0.186631	0.0751665	0.0698433	0.0600141	0.0432662	0.123475	0.122095	0.0630954	0.0113781	0.269638	0.11117	0.127791
231.367	0.08645	0.163573	0.127221	0.134206	0.122981	0.0597809	0.109753	0.24013	0.0809734	0.212881	0.137819	0.112678	0.0793646	0.101837	0.144265	0.0733971	0.0738248	0.0790946	0.132485	0.0927008	0.0989245	0.0868741	0.109793	0.135427	0.082174	0.164144	0.082174	0.147779	0.100234	0.195197	0.099646	0.0179108	0.0931092	0.0854211	0.137415	0.146902	0.0545758	0.0155164	0.160466	-0.0121119	0.0221474
232.381	0.0699918	0.182484	0.132308	0.113199	0.20007	0.0596833	0.101919	0.128212	0.0920365	0.307571	0.140589	0.0773294	0.0864236	0.0968722	0.0917925	0.0876595	0.0777749	0.0668055	0.0856646	0.0975041	0.0665492	0.0693653	0.0793084	0.0323606	0.108671	0.184467	0.108671	0.140483	0.113525	0.164523	0.0829887	0.0850294	0.116149	0.0454548	0.0976337	0.106151	0.0838284	0.00600107	0.176378	0.04175	0.0413527
233.39	0.0778174	0.146592	0.132192	0.0721778	0.189627	0.0541137	0.0933365	0.198278	0.0957996	0.229047	0.100889	0.0586697	0.0755736	0.155791	0.113212	0.0738132	0.0371514	0.0706578	0.108741	0.133735	0.0834232	0.111847	0.0933831	0.116664	0.0263486	0.169583	0.0263486	0.185646	0.103957	0.17485	0.100283	0.0476322	0.102426	0.0296632	0.103671	0.109983	0.0584493	0.0175905	0.134248	0.0334702	0.0413331
234.41	0.079719	0.123426	0.170433	0.0983404	0.131519	0.0354098	0.111211	0.222496	0.113493	0.240615	0.125054	0.0903309	0.12209	0.122776	0.133194	0.0766298	0.0817371	0.082546	0.0651089	0.14653	0.0704185	0.0874642	0.106088	0.0396176	0.145851	0.166667	0.145851	0.15457	0.135817	0.192658	0.122863	0.0511538	0.0948474	0.039456	0.131578	0.150406	0.0435973	0.0193129	0.107813	0.0524253	0.0315231
235.42	0.0561917	0.171675	0.163107	0.121462	0.134927	0.0593532	0.131664	0.0990133	0.145288	0.295486	0.158363	0.0864277	0.0922804	0.161108	0.132812	0.0903941	0.109749	0.070341	0.0846733	0.108186	0.087397	0.105705	0.0509904	0.130888	0.198331	0.228425	0.198331	0.155993	0.147704	0.215933	0.107258	0.0276944	0.0825768	0.0146541	0.112663	0.112046	0.0732259	-0.00990611	0.202758	0.147573	0.0971912
236.44	0.076512	0.116291	0.152532	0.0650289	0.173053	0.07867	0.102752	0.173289	0.0767904	0.218815	0.146915	0.0818725	0.102423	0.116617	0.149582	0.118291	0.0452798	0.0725508	0.0754926	0.112552	0.104508	0.0956739	0.0524213	-0.0140216	0.117697	0.214863	0.117697	0.227101	0.106928	0.234775	0.201861	0.0566985	0.0877421	0.0608656	0.160574	0.0718218	0.0349795	0.0172974	0.208056	0.0699279	0.0364146
237.46	0.0605985	0.174707	0.151108	0.0990012	0.175885	0.0822972	0.0814566	0.162204	0.089875	0.232524	0.145708	0.118373	0.102421	0.0748298	0.102687	0.104873	0.0436057	0.106427	0.058863	0.110758	0.0705107	0.113269	0.0934283	0.0605833	0.0856846	0.12112	0.0856846	0.174187	0.150663	0.204366	0.0766571	0.0626898	0.0904808	0.0550038	0.11048	0.0769927	0.0504711	0.00416626	0.150619	0.0302627	0.0458703
238.48	0.0746286	0.159511	0.152312	0.110391	0.155406	0.0814837	0.0647831	0.197379	0.0703671	0.236409	0.130788	0.0920209	0.0827161	0.0902531	0.0980851	0.0837131	0.093139	0.0721228	0.110467	0.080868	0.0342063	0.0314225	0.108901	0.0500161	0.0252154	0.100813	0.0252154	0.192516	0.11389	0.1463	0.112462	0.0215728	0.0539801	0.0316567	0.1289	0.133196	0.0739943	0.00806731	0.168478	0.0749174	0.0802143
239.49	0.0560726	0.1388	0.1524	0.101284	0.152056	0.0708732	0.074743	0.213126	0.0678602	0.235324	0.149313	0.0810136	0.105787	0.154444	0.148189	0.108548	0.0375553	0.0846782	0.157178	0.117972	0.0911902	0.00793391	0.0877585	-0.0152194	0.0957823	0.167331	0.0957823	0.171977	0.111299	0.165216	0.0641857	0.040458	0.102709	0.0171422	0.144325	0.114975	0.100308	0.0259302	0.216286	0.07279	0.117743
240.51	0.0806007	0.191585	0.181297	0.108132	0.172023	0.058295	0.0652796	0.11765	0.0910489	0.226019	0.181258	0.0927689	0.0641087	0.106718	0.101873	0.095811	0.0408848	0.0666508	0.138095	0.116205	0.101394	0.114217	0.0822191	0.0422994	0.104084	0.151149	0.104084	0.198589	0.0628603	0.157038	0.0855474	0.0653723	0.0851141	0.0484466	0.0990552	0.113448	0.0619997	0.000534194	0.183046	0.0238898	0.00116581
241.53	0.0666834	0.142135	0.174805	0.0425759	0.152086	0.061308	0.0815268	0.192692	0.10774	0.236243	0.138359	0.0927859	0.0894402	0.113507	0.117593	0.0848292	0.0644325	0.0789961	0.0588121	0.121154	0.0717199	0.0802521	0.0706374	-0.0369597	0.183305	0.184069	0.183305	0.158942	0.114604	0.167943	0.0949654	0.0500179	0.0962783	0.01466	0.0955269	0.0786807	0.00795605	-0.00539504	0.226457	0.0311767	0.01657
242.55	0.0711791	0.163157	0.167757	0.110313	0.0916116	0.0846372	0.0979148	0.158531	0.101631	0.209582	0.126474	0.089214	0.0765493	0.108283	0.0937506	0.0833976	0.0689785	0.0646497	0.154241	0.114792	0.0514859	0.0892992	0.127569	0.120963	0.0498052	0.105013	0.0498052	0.0682861	0.0847711	0.157751	0.0614901	0.0518506	0.0983716	0.0613008	0.104431	0.136168	0.0354951	0.00308864	0.160212	0.0145994	0.0447071
243.559	0.0957528	0.150114	0.168681	0.0999392	0.139223	0.0814402	0.0746143	0.196984	0.0770205	0.21293	0.168199	0.111371	0.0989877	0.131758	0.166027	0.109598	0.0464364	0.0622271	0.0901029	0.131372	0.130195	0.054588	0.119916	0.0940467	0.209466	0.251095	0.209466	0.0945345	0.0727629	0.186028	0.06099	0.0758584	0.10517	0.051857	0.130842	0.11302	0.0453442	0.009847	0.167744	0.0835031	0.0717976
244.715	0.0625065	0.147648	0.137765	0.0821951	0.16421	0.0476261	0.11577	0.231071	0.0785467	0.262066	0.165687	0.132472	0.0884859	0.122119	0.118835	0.0961978	0.0579621	0.079584	0.0443507	0.10776	0.0856123	0.128299	0.123616	0.176855	0.0437284	0.170805	0.0437284	0.15023	0.0936211	0.176007	0.114218	0.0586522	0.0888495	0.0268354	0.102622	0.0953126	0.0280699	0.00693778	0.159014	0.0926759	0.039035
245.609	0.0856322	0.143827	0.203556	0.0984482	0.149619	0.0770321	0.075352	0.262333	0.117565	0.253717	0.117641	0.0705645	0.0842136	0.120544	0.157166	0.0972955	0.0680286	0.0770076	0.102502	0.0968966	0.112135	0.101721	0.137119	0.063784	0.14584	0.164243	0.14584	0.210665	0.104188	0.197691	0.0897064	0.0370098	0.0711017	0.0355064	0.0984868	0.101863	0.049646	0.000321325	0.287366	0.104904	0.0756389
246.618	0.0572313	0.1527	0.130491	0.0726929	0.220922	0.0801617	0.0833084	0.121546	0.0895708	0.210767	0.113551	0.0780265	0.096726	0.121563	0.163074	0.0849222	0.0499936	0.0906094	0.130973	0.143902	0.146082	0.0464814	0.148628	0.0643069	0.0608116	0.134674	0.0608116	0.110905	0.104845	0.160519	0.0805904	0.0492545	0.108299	0.0405105	0.141877	0.138118	0.0823843	0.0310769	0.214362	0.147114	0.12208
247.638	0.0774728	0.150117	0.186696	0.0835077	0.144227	0.097381	0.0534166	0.194084	0.102173	0.196085	0.114321	0.0887126	0.0783074	0.118523	0.106094	0.0985468	0.0615409	0.0791743	0.0800324	0.116044	0.122238	0.0804888	0.070809	0.130131	0.146846	0.251065	0.146846	0.12983	0.0958576	0.145829	0.0906079	0.0488009	0.117352	0.0504486	0.099435	0.121063	0.0814412	0.0264895	0.221686	0.172729	0.0357134
248.649	0.0959625	0.151505	0.139842	0.0530926	0.117892	0.0784642	0.090248	0.176676	0.080193	0.2562	0.119526	0.0956035	0.10118	0.126145	0.164611	0.0866603	0.0577706	0.085767	0.0753537	0.143626	0.0928294	0.0781677	0.114399	-0.000672777	0.105276	0.148232	0.105276	0.154475	0.0915858	0.180901	0.122272	0.0746295	0.102052	0.0511432	0.115832	0.114326	0.0554735	0.0094688	0.235307	0.0576025	0.0955966
249.678	0.0698332	0.165442	0.13714	0.130581	0.15807	0.0693483	0.10392	0.157236	0.0975642	0.275694	0.154472	0.101795	0.0997863	0.17074	0.129971	0.0763258	0.0292606	0.104391	0.0956642	0.115808	0.0831522	0.102665	0.134043	0.0125008	0.109689	0.0745087	0.109689	0.141579	0.065175	0.159984	0.0829857	0.0581519	0.121456	0.0413852	0.129829	0.0847891	0.0503388	0.00145636	0.165016	0.098116	0.0732192
250.688	0.0471959	0.178212	0.126572	0.110804	0.156667	0.0704436	0.135046	0.217512	0.101723	0.221532	0.146991	0.101916	0.0909935	0.108438	0.103543	0.0605508	0.0381868	0.0680875	0.101707	0.122208	0.0848519	0.0915936	0.109314	0.0251003	0.185354	0.201542	0.185354	0.141926	0.11298	0.208154	0.0852766	0.0409307	0.100559	0.0434344	0.0795857	0.120054	0.0464034	0.012338	0.24371	0.0821623	0.0446612
251.708	0.0468961	0.173176	0.167327	0.0859377	0.153272	0.0862503	0.126056	0.155034	0.109598	0.252846	0.124752	0.133876	0.078835	0.144379	0.172139	0.0891209	0.0880158	0.0633913	0.0719588	0.127279	0.0916574	0.0988795	0.110637	-0.0240669	0.116133	0.225966	0.116133	0.153915	0.130424	0.188148	0.0675603	0.0775903	0.12104	0.0639783	0.100422	0.105267	0.0260205	5.65571e-05	0.247036	0.05038	0.0826197
252.734	0.0700851	0.169457	0.19754	0.11448	0.190283	0.0667071	0.119131	0.226311	0.104225	0.231226	0.150838	0.116331	0.11546	0.101739	0.135483	0.0870688	0.0537749	0.0796574	0.11832	0.125387	0.0655556	0.0692296	0.141217	-0.0759352	0.0284339	0.137839	0.0284339	0.161905	0.103517	0.157478	0.109036	0.0447609	0.0957989	0.0382458	0.135187	0.122954	0.0880607	-0.00396461	0.165401	0.0359637	0.054952
253.734	0.0431621	0.19057	0.179183	0.0624427	0.18135	0.0633583	0.109391	0.168086	0.0915231	0.242474	0.116835	0.0953211	0.111983	0.139424	0.177036	0.12305	0.0461883	0.0928553	0.0834013	0.107503	0.103434	0.113545	0.0625173	0.132465	0.122177	0.119576	0.122177	0.186891	0.139481	0.220661	0.160008	0.0328314	0.0905602	0.0742534	0.117161	0.141456	0.0887483	0.00477648	0.181135	0.0256639	0.0190202
254.745	0.101266	0.168363	0.140672	0.103341	0.126947	0.0731358	0.136418	0.20539	0.120668	0.261389	0.182692	0.143745	0.118481	0.122378	0.109762	0.0547115	0.0304662	0.0729724	0.156113	0.117783	0.111095	0.0927879	0.172156	0.0904467	0.0846783	0.0883916	0.0846783	0.108183	0.1113	0.198457	0.111461	0.0659129	0.1199	0.0523246	0.10452	0.0733081	0.0497679	-0.000967328	0.16141	0.0442772	0.0725583
255.765	0.0667717	0.152106	0.199613	0.0751334	0.157121	0.115873	0.131031	0.109384	0.0732272	0.267364	0.157286	0.0837971	0.103604	0.133572	0.11813	0.125482	0.0646794	0.0938916	0.0466656	0.112579	0.113107	0.0822954	0.0802762	0.0820088	0.0722078	0.113735	0.0722078	0.199251	0.126569	0.209757	0.1143	0.0426924	0.123135	0.0545734	0.131971	0.0805995	0.080888	0.0143025	0.202492	0.0391651	0.0403735
256.774	0.0931938	0.180164	0.178705	0.0719503	0.121686	0.0328953	0.0972972	0.211935	0.104751	0.296561	0.214894	0.137341	0.118861	0.127468	0.184748	0.0557273	0.0636755	0.0661089	0.101646	0.126002	0.0737096	0.139692	0.180934	0.156743	0.0879896	0.152291	0.0879896	0.127751	0.0858296	0.233775	0.108266	0.057133	0.0632406	0.0349683	0.137921	0.106804	0.0905136	0.042984	0.125046	0.0335019	0.00742093
257.794	0.0885428	0.222571	0.16154	0.0781109	0.0930839	0.0422705	0.116154	0.0926804	0.0862162	0.233008	0.154973	0.0845776	0.113395	0.127871	0.134142	0.0845978	0.0434761	0.068304	0.0655237	0.131135	0.0863635	0.100222	0.0799133	0.0528456	0.160605	0.227133	0.160605	0.226742	0.143918	0.208431	0.15561	0.0503742	0.107218	0.0343733	0.133194	0.112202	0.0684761	0.0128839	0.177993	0.010241	0.0263448
258.805	0.072986	0.202543	0.147035	0.0772495	0.150251	0.086094	0.103519	0.142456	0.115307	0.269403	0.16325	0.12296	0.139771	0.127239	0.154304	0.0944077	0.078316	0.0893658	0.121557	0.126537	0.0943451	0.115731	0.165668	0.108485	0.122341	0.177746	0.122341	0.192322	0.133627	0.196584	0.0474254	0.0478971	0.0913768	0.000742477	0.126093	0.117316	0.0843634	0.0120699	0.167385	0.0364988	0.0667852
259.824	0.0769998	0.140405	0.180483	0.0801613	0.204499	0.0675957	0.0800483	0.101122	0.0824797	0.229658	0.131829	0.0774259	0.080169	0.107645	0.125254	0.111351	0.0757474	0.117206	0.0561052	0.131299	0.00445672	0.0413192	0.0560292	-0.0176825	0.101932	0.221969	0.101932	0.147932	0.0975988	0.16926	0.122377	0.0291344	0.093973	0.0622704	0.107795	0.128603	0.0554914	0.0135171	0.263221	0.0658196	-0.00404926
260.834	0.0875635	0.178069	0.163255	0.105897	0.177064	0.068566	0.119577	0.158512	0.101685	0.266218	0.156029	0.136483	0.119006	0.162653	0.146716	0.0891599	0.0691487	0.0801166	0.0649406	0.125418	0.0920994	0.100368	0.0997747	-0.0301943	0.178224	0.137205	0.178224	0.0916325	0.123222	0.157173	0.0756487	0.0477026	0.120641	0.00596896	0.115167	0.17072	0.105092	0.0181868	0.168601	0.0127457	0.0765387
261.844	0.0587457	0.20337	0.164392	0.0461768	0.173955	0.0655259	0.110066	0.207016	0.107508	0.280545	0.194467	0.106759	0.10185	0.128252	0.109282	0.0855698	0.0171445	0.0838381	0.1553	0.107373	0.0586959	0.143841	0.0973495	0.0159408	0.132354	0.257676	0.132354	0.18639	0.116802	0.195444	0.163075	0.0455797	0.0983478	0.0143399	0.143035	0.104356	0.0451442	-0.0110489	0.197216	0.0186033	0.0139439
262.864	0.0596258	0.191949	0.178703	0.111577	0.152477	0.0524525	0.118959	0.118919	0.0877587	0.197673	0.160441	0.0895596	0.10849	0.138165	0.0884498	0.129771	0.0869453	0.102386	0.0727337	0.100981	0.0964063	0.0784504	0.089156	0.0156309	0.0770345	0.179864	0.0770345	0.152638	0.100599	0.210055	0.11422	0.0641662	0.0986063	0.0362897	0.115456	0.138906	0.0383312	0.000776004	0.158884	0.0514666	0.0234449
263.884	0.0833325	0.171161	0.198091	0.186149	0.147016	0.0737031	0.0833157	0.243209	0.0889565	0.266043	0.16199	0.112062	0.128218	0.130283	0.168352	0.107507	0.0451489	0.0875135	0.169765	0.116984	0.0762855	0.0838044	0.134251	-0.0195165	0.20262	0.322905	0.20262	0.115527	0.11516	0.22211	0.120114	0.0180514	0.0766582	0.0349915	0.127348	0.135502	0.00552598	0.0112377	0.134136	0.0132738	0.0112561
264.904	0.0562059	0.190438	0.166084	0.0654815	0.169713	0.0677516	0.132473	0.215718	0.120894	0.266786	0.153078	0.0869235	0.117004	0.13001	0.128071	0.125723	0.0526199	0.0915256	0.0832461	0.0698431	0.0655765	0.0672405	0.0718718	0.0472225	0.239737	0.297198	0.239737	0.220723	0.138489	0.189936	0.186813	0.0463248	0.0829863	0.0265281	0.132591	0.148776	0.037024	0.0146169	0.182914	0.0488923	0.03664
265.921	0.124723	0.184671	0.170015	0.072777	0.14987	0.0772946	0.126146	0.19875	0.103762	0.286184	0.149994	0.139684	0.101761	0.103096	0.179608	0.107114	0.0677623	0.106508	0.0952615	0.130514	0.120832	0.0772306	0.067573	-0.0922783	0.17264	0.33607	0.17264	0.0719578	0.109437	0.21452	0.0895419	0.0422049	0.0694825	0.0795327	0.134805	0.141074	0.0489013	0.00744906	0.218896	0.0424671	0.0890779
266.933	0.0781918	0.180678	0.233508	0.133541	0.120768	0.0645903	0.127499	0.183673	0.104982	0.26655	0.119722	0.126129	0.111736	0.121166	0.157997	0.0950856	0.0539796	0.072482	0.127775	0.113276	0.125466	0.0859805	0.077849	0.009667	0.256067	0.196686	0.256067	0.200564	0.116527	0.228212	0.127455	0.0779098	0.131732	0.0980328	0.0848871	0.0574043	0.024071	0.012198	0.230353	0.0602507	0.0474896
267.963	0.0706399	0.190184	0.185429	0.100802	0.200424	0.0811612	0.094101	0.155278	0.0998948	0.210072	0.145179	0.0997275	0.11287	0.141437	0.190241	0.0741765	0.0587878	0.0891585	0.119437	0.107776	0.0800984	0.0836615	0.123635	0.0565473	0.0626757	0.169209	0.0626757	0.194971	0.173106	0.216703	0.152295	0.0137193	0.100363	0.0553351	0.135852	0.114583	0.0453132	0.0221994	0.15556	0.0297829	-0.00885395
268.977	0.104267	0.209414	0.201785	0.0662275	0.146316	0.0880396	0.112173	0.12745	0.103789	0.266619	0.195925	0.119	0.106651	0.117601	0.115522	0.116651	0.0642635	0.0926766	0.0695343	0.0946363	0.0578869	0.0964036	0.143351	-0.00491553	0.114813	0.178031	0.114813	0.161897	0.130317	0.246465	0.137909	0.0507872	0.0665355	0.0794283	0.174308	0.177445	0.0762292	0.0211249	0.206528	0.00521572	0.0304232
269.994	0.0416004	0.203945	0.170235	0.0989411	0.180424	0.0920756	0.106825	0.153938	0.099425	0.28006	0.172338	0.143687	0.0983988	0.125916	0.1799	0.0727405	0.0436209	0.0692671	0.101326	0.113548	0.13744	0.16555	0.111781	0.0824349	0.0957074	0.12906	0.0957074	0.130919	0.14564	0.182259	0.110617	0.0551153	0.115605	0.0271944	0.114321	0.140365	0.0375385	-0.018415	0.210853	0.0478006	0.0259428
271.013	0.0766802	0.176962	0.20758	0.110772	0.173617	0.100264	0.135911	0.187762	0.111453	0.269098	0.158032	0.103181	0.0857088	0.12328	0.0854823	0.0871813	0.0181938	0.0905881	0.128433	0.0946959	0.0628379	0.0556653	0.125499	0.00973368	0.0319428	0.131071	0.0319428	0.146056	0.111954	0.198706	0.154299	0.052406	0.105969	0.0486999	0.111735	0.1277	0.071114	0.0137977	0.220571	0.0463048	0.0516872
272.014	0.0613969	0.170183	0.190081	0.124638	0.132224	0.0448996	0.150715	0.198971	0.098658	0.239281	0.0949526	0.0819513	0.103194	0.14441	0.105385	0.118037	0.00864865	0.0903389	0.161561	0.144685	0.108143	0.0750555	0.0615983	0.103145	0.11118	0.087194	0.11118	0.207929	0.185311	0.17096	0.186458	0.0627352	0.0898805	0.0511653	0.179602	0.154455	0.0589978	0.00948987	0.16931	0.0215175	0.0234895
273.034	0.0932213	0.20351	0.170413	0.0996473	0.13978	0.0403166	0.131389	0.224887	0.119102	0.266742	0.169546	0.101796	0.117685	0.125759	0.12806	0.11699	0.0318251	0.0914384	0.132383	0.119319	0.0986142	0.141843	0.133361	0.00809432	0.110255	0.0901825	0.110255	0.114454	0.0934536	0.218469	0.154153	0.0619104	0.114897	0.0010548	0.157713	0.146955	0.0590804	0.00486491	0.29295	0.0226251	0.0221822
274.062	0.0572647	0.177398	0.216561	0.0693226	0.136856	0.0667895	0.112492	0.162142	0.0981644	0.265514	0.194054	0.160032	0.0982743	0.135866	0.122723	0.0943062	0.0428007	0.0863761	0.170527	0.120326	0.0755893	0.089547	0.115331	-0.00889785	0.133193	0.137002	0.133193	0.111433	0.08015	0.167605	0.069826	0.0674321	0.07136	0.0722679	0.133565	0.121173	0.051609	-0.00626311	0.260085	0.069712	0.0174445
275.073	0.0839434	0.179311	0.190442	0.0565997	0.133215	0.157528	0.147085	0.194819	0.0944373	0.25966	0.21236	0.10702	0.114702	0.174576	0.145842	0.161638	0.0190019	0.12034	0.134038	0.103663	0.0927435	0.0961185	0.0560098	0.0436876	0.137543	0.208515	0.137543	0.10981	0.10061	0.170745	0.0493159	0.0544083	0.109537	0.0113663	0.177022	0.176388	0.0634905	0.0125156	0.26813	0.0806993	0.0623369
276.093	0.0821261	0.144881	0.163468	0.10041	0.177118	0.11061	0.0776104	0.204783	0.155728	0.227686	0.132703	0.0870701	0.104364	0.160193	0.195521	0.121266	0.0589603	0.0832481	0.104473	0.108924	0.0690867	0.103145	0.0865052	0.0651452	0.130737	0.258266	0.130737	0.192611	0.11679	0.221461	0.100412	0.0474577	0.0759812	0.0498328	0.151496	0.132714	0.0420332	0.0190642	0.32953	0.120247	0.125172
277.102	0.0776247	0.159698	0.18655	0.122428	0.132645	0.0786345	0.118169	0.195756	0.119903	0.240118	0.21573	0.112715	0.12723	0.122402	0.12107	0.0913204	0.0547911	0.098855	0.143047	0.0853544	0.0414375	0.0982614	0.112631	0.025641	0.128383	0.164926	0.128383	0.206215	0.185599	0.245316	0.142126	0.0272329	0.0992915	0.0385046	0.178577	0.145063	0.0583183	0.00056228	0.175332	0.05183	0.056278
278.122	0.103215	0.222063	0.154781	0.134003	0.15726	0.0630356	0.116299	0.277339	0.0975534	0.230551	0.120271	0.0973702	0.0970091	0.172085	0.0925114	0.106821	0.0475874	0.0753046	0.140814	0.148153	0.0846753	0.147919	0.110098	0.0961264	0.0806013	0.148201	0.0806013	0.184142	0.127392	0.235519	0.165538	0.0489029	0.0790933	0.0552957	0.136371	0.136555	0.0784204	0.0236756	0.320381	0.145799	0.0838947
279.133	0.0826583	0.184983	0.181255	0.0933448	0.210549	0.119754	0.197259	0.150171	0.10063	0.253156	0.152102	0.08396	0.0971777	0.105467	0.108962	0.0566869	0.0197227	0.0593672	0.138743	0.110342	0.0828059	0.0985516	0.068184	0.0972248	0.134169	0.22802	0.134169	0.159878	0.123153	0.208774	0.0958133	0.0460981	0.0824407	0.0537095	0.127035	0.200212	0.055078	0.00659226	0.184984	0.106848	0.0221182
280.152	0.0672321	0.205105	0.202618	0.0817564	0.13366	0.0720503	0.142116	0.228887	0.140096	0.24602	0.181142	0.0769115	0.0949827	0.142574	0.148185	0.0897919	0.0343334	0.0755623	0.111458	0.134171	0.0837155	0.113147	0.120203	0.018479	0.0900414	0.0990078	0.0900414	0.190364	0.153152	0.187641	0.0903067	0.0412293	0.0867721	0.00711343	0.154436	0.192439	0.046965	-5.79761e-05	0.250827	0.0963652	0.00246519
281.162	0.085427	0.201145	0.172813	0.0923324	0.1579	0.0783001	0.13954	0.142593	0.103501	0.218788	0.136942	0.0828263	0.105309	0.150908	0.127968	0.091491	0.0612448	0.0651656	0.133242	0.15084	0.119212	0.179218	0.112832	0.00195174	0.109693	0.196684	0.109693	0.179202	0.134577	0.190343	0.125324	0.0333871	0.0786344	0.0519756	0.104249	0.18424	0.0504876	0.0236875	0.170923	0.107654	0.0555363
282.166	0.0782678	0.169557	0.189089	0.142597	0.151634	0.0699339	0.114415	0.102346	0.0960355	0.250627	0.18425	0.109202	0.0712167	0.139481	0.081378	0.103025	0.0591174	0.0841372	0.16483	0.136367	0.0870501	0.109586	0.114688	0.0941904	0.150101	0.125042	0.150101	0.130797	0.121236	0.168551	0.119837	0.0240253	0.0946938	0.065308	0.137805	0.140314	0.0173061	0.0058536	0.184926	0.0414313	0.0493193
283.195	0.0855123	0.192778	0.176966	0.0818165	0.148494	0.0870093	0.11783	0.196637	0.115694	0.228315	0.184011	0.107652	0.0967758	0.141944	0.0937241	0.0697079	0.0815106	0.078095	0.119773	0.116693	0.0940689	0.109633	0.129536	0.0578176	0.149948	0.0977358	0.149948	0.16795	0.157913	0.23032	0.127356	0.0492801	0.0825214	0.0533169	0.131145	0.0539002	0.0312033	-0.00562095	0.213478	0.0250244	0.0534713
284.202	0.059075	0.169212	0.19158	0.0840903	0.170266	0.0554896	0.14285	0.15771	0.114458	0.300707	0.192825	0.116353	0.119294	0.141328	0.0925234	0.112871	0.0725149	0.075466	0.0744509	0.0649225	0.0497857	0.14765	0.151992	0.122013	0.196722	0.120496	0.196722	0.182755	0.143754	0.224904	0.138482	0.0412927	0.0930201	0.0558843	0.152909	0.108355	0.0604815	0.000962448	0.213095	0.0358924	0.0342495
285.221	0.0890999	0.203556	0.189573	0.0602266	0.121425	0.0853307	0.108305	0.133204	0.105306	0.200271	0.144815	0.0808248	0.114099	0.128733	0.0742278	0.100561	0.0630607	0.0693288	0.158436	0.101514	0.0709445	0.0489413	0.0750622	0.00667309	0.129891	0.163591	0.129891	0.158962	0.107372	0.210811	0.172329	0.0319955	0.095842	-0.00731738	0.156582	0.190222	0.0700535	0.0144726	0.232149	0.0695308	0.0841647
286.232	0.0770886	0.180674	0.159629	0.0908543	0.197298	0.0772035	0.130291	0.165189	0.120432	0.232435	0.174778	0.110927	0.143	0.144821	0.0805427	0.10369	0.0662671	0.0921435	0.144499	0.120481	0.112036	0.126959	0.0834915	0.000859768	0.114375	0.128708	0.114375	0.159908	0.0885134	0.222721	0.084801	0.0378771	0.0956344	0.0861285	0.100514	0.100122	0.0193165	0.00624861	0.184571	0.0661744	0.00610356
287.246	0.0763384	0.163785	0.210468	0.0818879	0.163674	0.0619956	0.14088	0.21532	0.107301	0.259901	0.159466	0.108786	0.110489	0.13645	0.117642	0.0823087	0.0633242	0.0729302	0.0962163	0.105151	0.0459307	0.117317	0.0879971	0.0538231	0.139076	0.119772	0.139076	0.133318	0.121966	0.166246	0.128845	0.0429052	0.0927226	0.0558268	0.178683	0.139183	0.0802665	0.00325265	0.226459	0.0363119	0.0609192
288.258	0.0930817	0.238435	0.166985	0.129769	0.155726	0.0693503	0.117629	0.126643	0.108336	0.253653	0.18796	0.102429	0.112062	0.144443	0.0964192	0.0986252	0.051448	0.084556	0.106074	0.125545	0.0452893	0.128	0.0755253	0.0335285	0.158166	0.175932	0.158166	0.133059	0.177704	0.200467	0.161449	0.072012	0.103267	0.0645246	0.137817	0.155452	0.0145039	0.00106987	0.317431	0.0533785	0.0557994
289.294	0.0742783	0.198563	0.176365	0.0669902	0.193973	0.0698687	0.148209	0.175585	0.0989941	0.234498	0.179758	0.12108	0.123311	0.132104	0.11193	0.11002	0.0740647	0.0945846	0.173169	0.121415	0.0491064	0.124306	0.183262	0.0266845	0.108328	0.0966683	0.108328	0.114399	0.116343	0.182155	0.0633397	0.0681308	0.0963932	0.0366787	0.18137	0.18506	0.0277396	0.00792279	0.395236	0.0812468	0.0825038
290.302	0.089769	0.19159	0.165264	0.125083	0.175266	0.0985824	0.109538	0.0861748	0.114906	0.236214	0.186138	0.123986	0.10808	0.14974	0.0882141	0.0980645	0.0795433	0.0842976	0.116624	0.105475	0.0829101	0.0794597	0.100759	0.0914102	0.0609178	0.138507	0.0609178	0.169895	0.146658	0.206442	0.0928476	0.0701892	0.071345	0.0325442	0.172787	0.195887	0.0426334	0.0226125	0.19832	0.0236215	0.0491493
291.314	0.0441926	0.149665	0.199038	0.121952	0.136663	0.0629846	0.102814	0.071542	0.118407	0.24046	0.180592	0.101124	0.0842723	0.154952	0.11754	0.0833823	0.0183478	0.0764287	0.122287	0.103015	0.0718303	0.169433	0.16682	0.089196	0.130221	0.0703471	0.130221	0.131329	0.109252	0.167447	0.0749601	0.0668654	0.100715	0.0287791	0.172994	0.193839	0.0362258	0.0159534	0.349958	0.0795346	0.103056
292.334	0.0836393	0.163942	0.179368	0.0688815	0.180636	0.0734477	0.128803	0.170457	0.139034	0.262764	0.207059	0.132972	0.112065	0.173745	0.14869	0.086338	0.0435949	0.100356	0.174116	0.126946	0.0106628	0.13426	0.16674	0.115277	0.121836	0.214947	0.121836	0.170278	0.162643	0.189001	0.145423	0.0271976	0.0951982	0.0633714	0.119026	0.144323	0.0657511	0.0221483	0.236327	0.0571744	0.0629771
293.345	0.110745	0.181444	0.159396	0.0771452	0.157078	0.107574	0.135569	0.189513	0.112057	0.244174	0.15214	0.113946	0.0871335	0.153905	0.111977	0.0846782	0.0663305	0.0626389	0.120172	0.118434	0.101357	0.144552	0.18121	0.137556	0.15576	0.169759	0.15576	0.134048	0.143545	0.252743	0.16112	0.054836	0.113504	0.124632	0.13746	0.212048	0.0475436	0.038241	0.218213	0.0229586	0.0224709
294.351	0.0549129	0.206847	0.192722	0.0732581	0.18142	0.0896385	0.101795	0.17538	0.147964	0.235855	0.173389	0.109589	0.0626757	0.167891	0.0955499	0.126683	0.0759907	0.108788	0.170837	0.134366	0.0608136	0.128556	0.0921093	0.0306339	0.0983594	0.0928104	0.0983594	0.127873	0.172125	0.225288	0.178074	0.0676931	0.130096	0.0344937	0.125889	0.171119	0.0370013	0.0164353	0.402359	0.101498	0.0393969
295.371	0.0635326	0.178063	0.21214	0.05918	0.114845	0.072145	0.124321	0.170533	0.102695	0.224864	0.167941	0.100957	0.0926512	0.174654	0.106764	0.115243	0.0517489	0.0937409	0.166049	0.114042	0.0871804	0.0951335	0.140336	-0.0566546	0.138674	0.122568	0.138674	0.170218	0.11152	0.202552	0.113849	0.0723368	0.0902769	0.0532029	0.127831	0.135241	0.0618758	0.0233261	0.218527	0.0674702	0.0512573
296.385	0.114882	0.109722	0.178313	0.0661962	0.161227	0.0983045	0.154298	0.136939	0.0958904	0.264619	0.193885	0.132156	0.120068	0.123381	0.103971	0.100523	0.0528687	0.0999023	0.13081	0.123822	0.095708	0.183724	0.180479	0.00766469	0.118396	0.145652	0.118396	0.212944	0.181562	0.210985	0.0724832	0.0387722	0.0793443	0.038187	0.167296	0.197376	0.0469117	0.0105935	0.272807	0.026949	-0.00168132
297.405	0.0499369	0.1488	0.218809	0.0613601	0.103872	0.0998988	0.156077	0.235611	0.141186	0.263996	0.142918	0.116979	0.10602	0.143138	0.0829957	0.106039	0.0655731	0.0914173	0.0831834	0.0903216	0.0868863	0.140091	0.199418	0.0740006	0.121379	0.148033	0.121379	0.161233	0.112442	0.203112	0.10843	0.0677273	0.0944165	0.0662241	0.165847	0.175953	0.0739789	-0.0024804	0.325515	0.0317626	0.0417138
298.411	0.104858	0.200575	0.200824	0.045848	0.163626	0.115823	0.126976	0.212277	0.114373	0.265512	0.162168	0.116843	0.102072	0.166339	0.101464	0.1168	0.0724176	0.0706914	0.200053	0.144619	0.0899494	0.179909	0.217334	0.0750687	0.102881	0.104463	0.102881	0.170469	0.152471	0.229598	0.162451	0.0191681	0.0979988	0.0135656	0.132422	0.163171	0.0557819	0.011269	0.236767	0.0818581	0.0632655
299.422	0.0680313	0.170356	0.209894	0.106022	0.171497	0.0614738	0.187968	0.101848	0.101534	0.253412	0.166048	0.12238	0.109139	0.161072	0.10476	0.0970175	0.0614335	0.0516347	0.145855	0.129883	0.0840506	0.114836	0.10697	0.125219	0.048897	0.116846	0.048897	0.155472	0.147182	0.173603	0.137904	0.0636081	0.076647	0.0218399	0.117181	0.169754	0.0526176	0.0124193	0.263055	0.0803428	0.0265554
300.444	0.105255	0.213239	0.191429	0.10348	0.164665	0.0703944	0.0980451	0.21644	0.0983762	0.28798	0.217269	0.11963	0.0914121	0.135735	0.105272	0.0888491	0.0463277	0.0663638	0.113626	0.0948011	0.0539862	0.11411	0.115826	-0.0255162	0.0891352	0.12621	0.0891352	0.0992959	0.112988	0.211928	0.129727	0.0386215	0.0838046	0.00655556	0.116782	0.128691	0.0878628	0.0278164	0.272102	0.0720552	0.0421736
301.461	0.0952344	0.215288	0.194374	0.09183	0.157191	0.0779715	0.141088	0.116223	0.11884	0.289443	0.159554	0.117809	0.0912611	0.163382	0.081875	0.0959631	0.0919748	0.0620496	0.174921	0.130316	0.0888434	0.0916036	0.102542	0.0206213	0.0304468	0.096838	0.0304468	0.149159	0.158915	0.159461	0.0951031	0.0823768	0.0954632	0.0294675	0.128597	0.146681	0.0338286	0.0082345	0.310427	0.113318	0.0227098
302.467	0.0669981	0.174388	0.176603	0.112156	0.172636	0.0993626	0.170624	0.134389	0.0895546	0.257459	0.185242	0.0901546	0.0945062	0.183809	0.0932444	0.11137	0.060082	0.0886991	0.115738	0.0589129	0.0536543	0.129566	0.170278	0.0860222	0.141268	0.149957	0.141268	0.156591	0.126426	0.192731	0.144665	0.051656	0.0807217	0.035067	0.166578	0.172805	0.0991673	0.0258338	0.25637	0.02824	0.0850562
303.478	0.0765821	0.180433	0.177911	0.080125	0.163101	0.0887691	0.150644	0.180131	0.10351	0.250315	0.196093	0.0995319	0.116841	0.168008	0.113779	0.0872427	0.0486642	0.0753783	0.114932	0.115074	0.0587251	0.0947763	0.237967	0.0199883	0.222685	0.174678	0.222685	0.123929	0.130956	0.180462	0.0923665	0.0390156	0.090107	0.0506979	0.127954	0.0924208	0.0202985	-0.0127301	0.227182	0.0580772	0.0711026
