# Supplementary material for: Robo2 regulates synaptic oxytocin content by affecting actin dynamics
Source: eLife. 2019 Jun 10;8:e45650. doi: 10.7554/eLife.45650 (PMC6590984; doi:10.7554/eLife.45650)
Supplement: Figure 7—source data 1. — The excel sheet includes values for EGFP- and OXT- fluorescence values of neurohypophyseal synapses in larvae that were subjected to OXT-neuron specific EGFP or Cdc42(T17N) or Cdc42(G12V) expression in robo2 +/+ vs robo2 -/-. [file elife-45650-fig7-data1.xlsx]

## Sheet: 7C
Source data for regression analysis
Pheno	BlobsID	Item.Name	Synapse Volume	MeanOXTint	MeanGFPint
wt_uasgfp	wt_uasgfp727	wt_uasgfp08.lsm (cropped)	0.982	73.48	28.78
wt_uasgfp	wt_uasgfp737	wt_uasgfp08.lsm (cropped)	0.417	60.04	34.84
wt_uasgfp	wt_uasgfp760	wt_uasgfp08.lsm (cropped)	0.547	81.24	47.16
wt_uasgfp	wt_uasgfp761	wt_uasgfp08.lsm (cropped)	1.07	74.16	22.17
wt_uasgfp	wt_uasgfp771	wt_uasgfp08.lsm (cropped)	0.374	65.12	28.33
wt_uasgfp	wt_uasgfp775	wt_uasgfp08.lsm (cropped)	0.328	65.47	63.73
wt_uasgfp	wt_uasgfp779	wt_uasgfp08.lsm (cropped)	1.11	67.41	16.25
wt_uasgfp	wt_uasgfp785	wt_uasgfp08.lsm (cropped)	1.03	63.29	62.83
wt_uasgfp	wt_uasgfp804	wt_uasgfp08.lsm (cropped)	0.246	65.51	15.69
wt_uasgfp	wt_uasgfp822	wt_uasgfp08.lsm (cropped)	1.84	82.22	62.08
wt_uasgfp	wt_uasgfp824	wt_uasgfp08.lsm (cropped)	3.45	81.26	55.53
wt_uasgfp	wt_uasgfp825	wt_uasgfp08.lsm (cropped)	9.12	89.86	27.48
wt_uasgfp	wt_uasgfp826	wt_uasgfp08.lsm (cropped)	5.33	65.02	10.89
wt_uasgfp	wt_uasgfp834	wt_uasgfp08.lsm (cropped)	4.52	82.77	28.96
wt_uasgfp	wt_uasgfp846	wt_uasgfp08.lsm (cropped)	1.85	72.53	38.84
wt_uasgfp	wt_uasgfp849	wt_uasgfp08.lsm (cropped)	3.87	69.57	16
wt_uasgfp	wt_uasgfp852	wt_uasgfp08.lsm (cropped)	9.61	95.23	53.49
wt_uasgfp	wt_uasgfp854	wt_uasgfp08.lsm (cropped)	2.12	66.38	48.02
wt_uasgfp	wt_uasgfp856	wt_uasgfp08.lsm (cropped)	5.51	74.05	50.1
wt_uasgfp	wt_uasgfp862	wt_uasgfp08.lsm (cropped)	2.64	74.96	8.88
wt_uasgfp	wt_uasgfp863	wt_uasgfp08.lsm (cropped)	3.3	73.89	19.22
wt_uasgfp	wt_uasgfp864	wt_uasgfp08.lsm (cropped)	2.66	79.17	20.75
wt_uasgfp	wt_uasgfp870	wt_uasgfp08.lsm (cropped)	1.87	64.26	27.04
wt_uasgfp	wt_uasgfp874	wt_uasgfp08.lsm (cropped)	5.43	70.18	5.32
wt_uasgfp	wt_uasgfp875	wt_uasgfp08.lsm (cropped)	0.243	54.48	33.58
wt_uasgfp	wt_uasgfp878	wt_uasgfp08.lsm (cropped)	2.06	71.22	33.25
wt_uasgfp	wt_uasgfp879	wt_uasgfp08.lsm (cropped)	0.9	62.66	50.85
wt_uasgfp	wt_uasgfp881	wt_uasgfp08.lsm (cropped)	0.277	55.09	20.36
wt_uasgfp	wt_uasgfp883	wt_uasgfp08.lsm (cropped)	0.651	62.85	89.89
wt_uasgfp	wt_uasgfp891	wt_uasgfp08.lsm (cropped)	2.23	65.45	7.85
wt_uasgfp	wt_uasgfp901	wt_uasgfp08.lsm (cropped)	7.34	72.79	5.69
wt_uasgfp	wt_uasgfp905	wt_uasgfp08.lsm (cropped)	4.67	83.83	4.61
wt_uasgfp	wt_uasgfp907	wt_uasgfp08.lsm (cropped)	2.96	74.53	52.46
wt_uasgfp	wt_uasgfp915	wt_uasgfp08.lsm (cropped)	2.86	70.15	40.66
wt_uasgfp	wt_uasgfp920	wt_uasgfp08.lsm (cropped)	0.961	61.82	23.81
wt_uasgfp	wt_uasgfp2355	wt_uasgfp14.lsm (cropped)	0.35	43.44	81.38
wt_uasgfp	wt_uasgfp2356	wt_uasgfp14.lsm (cropped)	0.322	43.06	24.13
wt_uasgfp	wt_uasgfp2365	wt_uasgfp14.lsm (cropped)	0.45	41.14	71.02
wt_uasgfp	wt_uasgfp2369	wt_uasgfp14.lsm (cropped)	3.15	47.38	11.65
wt_uasgfp	wt_uasgfp2370	wt_uasgfp14.lsm (cropped)	2.14	46.16	5.24
wt_uasgfp	wt_uasgfp2372	wt_uasgfp14.lsm (cropped)	2.58	47.59	12.53
wt_uasgfp	wt_uasgfp2378	wt_uasgfp14.lsm (cropped)	1.41	45.03	92.03
wt_uasgfp	wt_uasgfp2380	wt_uasgfp14.lsm (cropped)	1.5	51.06	13.47
wt_uasgfp	wt_uasgfp2382	wt_uasgfp14.lsm (cropped)	0.867	46.67	8.45
wt_uasgfp	wt_uasgfp2386	wt_uasgfp14.lsm (cropped)	0.286	37.89	26.49
wt_uasgfp	wt_uasgfp2391	wt_uasgfp14.lsm (cropped)	0.584	43.01	50.27
wt_uasgfp	wt_uasgfp2393	wt_uasgfp14.lsm (cropped)	0.505	44.8	33.57
wt_uasgfp	wt_uasgfp2400	wt_uasgfp14.lsm (cropped)	0.45	44.18	35.17
wt_uasgfp	wt_uasgfp2404	wt_uasgfp14.lsm (cropped)	16.67	65.21	26.03
wt_uasgfp	wt_uasgfp2405	wt_uasgfp14.lsm (cropped)	0.891	51.45	10.47
wt_uasgfp	wt_uasgfp2416	wt_uasgfp14.lsm (cropped)	0.623	43.41	7.42
wt_uasgfp	wt_uasgfp2420	wt_uasgfp14.lsm (cropped)	1.76	49.33	25.53
wt_uasgfp	wt_uasgfp2428	wt_uasgfp14.lsm (cropped)	1.23	50.05	13.05
wt_uasgfp	wt_uasgfp2429	wt_uasgfp14.lsm (cropped)	1.01	46.47	5.22
wt_uasgfp	wt_uasgfp2435	wt_uasgfp14.lsm (cropped)	3.8	47.74	8.21
wt_uasgfp	wt_uasgfp2438	wt_uasgfp14.lsm (cropped)	13.24	58.97	4.43
wt_uasgfp	wt_uasgfp2440	wt_uasgfp14.lsm (cropped)	0.328	41.38	146.31
wt_uasgfp	wt_uasgfp2450	wt_uasgfp14.lsm (cropped)	1.24	39.65	45.88
wt_uasgfp	wt_uasgfp2474	wt_uasgfp14.lsm (cropped)	1.3	40.49	9.34
wt_uasgfp	wt_uasgfp2475	wt_uasgfp14.lsm (cropped)	0.213	37.86	101.89
wt_uasgfp	wt_uasgfp2476	wt_uasgfp14.lsm (cropped)	1.02	41.87	62.13
wt_uasgfp	wt_uasgfp2497	wt_uasgfp14.lsm (cropped)	0.362	39.45	108.8
wt_uasgfp	wt_uasgfp2513	wt_uasgfp14.lsm (cropped)	0.544	37.55	25.66
wt_uasgfp	wt_uasgfp2517	wt_uasgfp14.lsm (cropped)	0.219	38.39	164.15
wt_uasgfp	wt_uasgfp2520	wt_uasgfp14.lsm (cropped)	1.95	45.29	44.37
wt_uasgfp	wt_uasgfp2532	wt_uasgfp14.lsm (cropped)	2.17	42.34	12.16
wt_uasgfp	wt_uasgfp2533	wt_uasgfp14.lsm (cropped)	1.2	41.15	28.83
wt_uasgfp	wt_uasgfp2534	wt_uasgfp14.lsm (cropped)	0.842	53.12	9.35
wt_uasgfp	wt_uasgfp2539	wt_uasgfp14.lsm (cropped)	2.89	49.89	18.97
wt_uasgfp	wt_uasgfp2541	wt_uasgfp14.lsm (cropped)	2.32	44.93	139.72
wt_uasgfp	wt_uasgfp2560	wt_uasgfp14.lsm (cropped)	0.471	41.32	20.99
wt_uasgfp	wt_uasgfp2570	wt_uasgfp14.lsm (cropped)	0.663	40.81	10.92
wt_uasgfp	wt_uasgfp2589	wt_uasgfp14.lsm (cropped)	3.56	46.4	4.49
wt_uasgfp	wt_uasgfp2598	wt_uasgfp14.lsm (cropped)	7.06	51.81	12.85
wt_uasgfp	wt_uasgfp2599	wt_uasgfp14.lsm (cropped)	3.13	42.31	8.3
wt_uasgfp	wt_uasgfp2612	wt_uasgfp14.lsm (cropped)	2.05	59.04	11.12
wt_uasgfp	wt_uasgfp2616	wt_uasgfp14.lsm (cropped)	4.02	46.62	28.93
wt_uasgfp	wt_uasgfp2617	wt_uasgfp14.lsm (cropped)	4.71	45.73	18.26
wt_uasgfp	wt_uasgfp2624	wt_uasgfp14.lsm (cropped)	12	57.28	19.86
wt_uasgfp	wt_uasgfp2633	wt_uasgfp14.lsm (cropped)	2.17	56.98	10.46
wt_uasgfp	wt_uasgfp2644	wt_uasgfp14.lsm (cropped)	3.49	48.78	17.36
wt_uasgfp	wt_uasgfp2667	wt_uasgfp14.lsm (cropped)	0.824	38.72	26.45
wt_uasgfp	wt_uasgfp2682	wt_uasgfp14.lsm (cropped)	0.435	41.77	10.85
wt_uasgfp	wt_uasgfp2684	wt_uasgfp14.lsm (cropped)	0.62	44.11	36.78
wt_uasgfp	wt_uasgfp2688	wt_uasgfp14.lsm (cropped)	8.38	45.09	8.48
wt_uasgfp	wt_uasgfp4250	wt_uasgfp18.lsm (cropped)	1.6	79.23	11.24
wt_uasgfp	wt_uasgfp4257	wt_uasgfp18.lsm (cropped)	0.806	64.45	41.71
wt_uasgfp	wt_uasgfp4258	wt_uasgfp18.lsm (cropped)	0.274	55.03	243.69
wt_uasgfp	wt_uasgfp4274	wt_uasgfp18.lsm (cropped)	0.821	56.87	97.83
wt_uasgfp	wt_uasgfp4278	wt_uasgfp18.lsm (cropped)	2.96	79.31	89.75
wt_uasgfp	wt_uasgfp4294	wt_uasgfp18.lsm (cropped)	0.508	58.03	51.34
wt_uasgfp	wt_uasgfp4297	wt_uasgfp18.lsm (cropped)	0.438	58.35	133.44
wt_uasgfp	wt_uasgfp4298	wt_uasgfp18.lsm (cropped)	1.09	73.4	156.35
wt_uasgfp	wt_uasgfp4307	wt_uasgfp18.lsm (cropped)	1.7	65.37	54.29
wt_uasgfp	wt_uasgfp4308	wt_uasgfp18.lsm (cropped)	0.341	62.79	20.01
wt_uasgfp	wt_uasgfp4309	wt_uasgfp18.lsm (cropped)	0.824	64.33	15.66
wt_uasgfp	wt_uasgfp4311	wt_uasgfp18.lsm (cropped)	1.89	75.38	12.28
wt_uasgfp	wt_uasgfp4313	wt_uasgfp18.lsm (cropped)	0.958	67	42.61
wt_uasgfp	wt_uasgfp4314	wt_uasgfp18.lsm (cropped)	1.81	66.29	15.17
wt_uasgfp	wt_uasgfp4318	wt_uasgfp18.lsm (cropped)	0.356	88.85	132.88
wt_uasgfp	wt_uasgfp4329	wt_uasgfp18.lsm (cropped)	1.72	89.19	9.87
wt_uasgfp	wt_uasgfp4338	wt_uasgfp18.lsm (cropped)	0.225	58.09	29.26
wt_uasgfp	wt_uasgfp4343	wt_uasgfp18.lsm (cropped)	4.98	69.27	26.76
wt_uasgfp	wt_uasgfp4357	wt_uasgfp18.lsm (cropped)	0.453	58.67	190.88
wt_uasgfp	wt_uasgfp4358	wt_uasgfp18.lsm (cropped)	0.325	56.04	91.02
wt_uasgfp	wt_uasgfp4360	wt_uasgfp18.lsm (cropped)	2.41	87.3	27.18
wt_uasgfp	wt_uasgfp4363	wt_uasgfp18.lsm (cropped)	1	75.97	9.3
wt_uasgfp	wt_uasgfp4367	wt_uasgfp18.lsm (cropped)	0.301	60.66	19.9
wt_uasgfp	wt_uasgfp4374	wt_uasgfp18.lsm (cropped)	2.09	83.2	42.01
wt_uasgfp	wt_uasgfp4377	wt_uasgfp18.lsm (cropped)	0.277	64.68	14.19
wt_uasgfp	wt_uasgfp4378	wt_uasgfp18.lsm (cropped)	0.207	59.37	43.15
wt_uasgfp	wt_uasgfp4415	wt_uasgfp18.lsm (cropped)	0.225	56.5	192.5
wt_uasgfp	wt_uasgfp4425	wt_uasgfp18.lsm (cropped)	0.508	65.15	12.31
wt_uasgfp	wt_uasgfp4428	wt_uasgfp18.lsm (cropped)	1.22	60.82	12.67
wt_uasgfp	wt_uasgfp4437	wt_uasgfp18.lsm (cropped)	0.523	60.62	18.86
wt_uasgfp	wt_uasgfp4446	wt_uasgfp18.lsm (cropped)	2.94	84.48	35.6
wt_uasgfp	wt_uasgfp4453	wt_uasgfp18.lsm (cropped)	1.63	58.92	5.45
wt_uasgfp	wt_uasgfp4457	wt_uasgfp18.lsm (cropped)	0.423	56.55	43.67
wt_uasgfp	wt_uasgfp4464	wt_uasgfp18.lsm (cropped)	0.35	55.81	19.22
wt_uasgfp	wt_uasgfp4471	wt_uasgfp18.lsm (cropped)	2.13	76.51	77.74
wt_uasgfp	wt_uasgfp4474	wt_uasgfp18.lsm (cropped)	7.44	72.88	29.02
wt_uasgfp	wt_uasgfp4493	wt_uasgfp18.lsm (cropped)	4.43	69.24	13.74
wt_uasgfp	wt_uasgfp4496	wt_uasgfp18.lsm (cropped)	17.64	93.86	39.44
wt_uasgfp	wt_uasgfp4528	wt_uasgfp18.lsm (cropped)	0.839	58.38	175.19
wt_uasgfp	wt_uasgfp4529	wt_uasgfp18.lsm (cropped)	8.27	67.96	80.48
wt_uasgfp	wt_uasgfp4531	wt_uasgfp18.lsm (cropped)	0.897	59.46	95.46
wt_uasgfp	wt_uasgfp4545	wt_uasgfp18.lsm (cropped)	0.931	56.23	27.01
wt_uasgfp	wt_uasgfp4560	wt_uasgfp18.lsm (cropped)	8.55	85.44	11.4
wt_uasgfp	wt_uasgfp4566	wt_uasgfp18.lsm (cropped)	0.265	55.85	19.78
wt_uasgfp	wt_uasgfp6125	wt_uasgfp19.lsm (cropped)	0.277	19.34	37.82
wt_uasgfp	wt_uasgfp6127	wt_uasgfp19.lsm (cropped)	2.9	22.09	33.39
wt_uasgfp	wt_uasgfp6128	wt_uasgfp19.lsm (cropped)	0.283	18.67	8.35
wt_uasgfp	wt_uasgfp6130	wt_uasgfp19.lsm (cropped)	0.213	17.13	10.94
wt_uasgfp	wt_uasgfp6132	wt_uasgfp19.lsm (cropped)	0.687	19.5	5.26
wt_uasgfp	wt_uasgfp6134	wt_uasgfp19.lsm (cropped)	0.35	17.74	8.34
wt_uasgfp	wt_uasgfp6137	wt_uasgfp19.lsm (cropped)	3.79	22.79	3.25
wt_uasgfp	wt_uasgfp6140	wt_uasgfp19.lsm (cropped)	1.35	20.16	20.32
wt_uasgfp	wt_uasgfp6141	wt_uasgfp19.lsm (cropped)	1.11	20.47	27.27
wt_uasgfp	wt_uasgfp6144	wt_uasgfp19.lsm (cropped)	0.83	19.94	5.75
wt_uasgfp	wt_uasgfp6148	wt_uasgfp19.lsm (cropped)	2.22	19.81	6.79
wt_uasgfp	wt_uasgfp6156	wt_uasgfp19.lsm (cropped)	0.319	18.37	22.14
wt_uasgfp	wt_uasgfp6167	wt_uasgfp19.lsm (cropped)	1.41	20.79	5.65
wt_uasgfp	wt_uasgfp6171	wt_uasgfp19.lsm (cropped)	0.392	17.45	9.46
wt_uasgfp	wt_uasgfp6172	wt_uasgfp19.lsm (cropped)	0.292	16.99	4.46
wt_uasgfp	wt_uasgfp6182	wt_uasgfp19.lsm (cropped)	0.648	18.8	7.12
wt_uasgfp	wt_uasgfp6193	wt_uasgfp19.lsm (cropped)	2.37	21.32	4.79
wt_uasgfp	wt_uasgfp6196	wt_uasgfp19.lsm (cropped)	1.68	19.54	17.43
wt_uasgfp	wt_uasgfp6197	wt_uasgfp19.lsm (cropped)	2.12	18.65	8.79
wt_uasgfp	wt_uasgfp6200	wt_uasgfp19.lsm (cropped)	7.47	25.54	5.99
wt_uasgfp	wt_uasgfp6204	wt_uasgfp19.lsm (cropped)	3.57	21.17	2.93
wt_uasgfp	wt_uasgfp6214	wt_uasgfp19.lsm (cropped)	1.14	19.08	4.73
wt_uasgfp	wt_uasgfp6220	wt_uasgfp19.lsm (cropped)	0.505	18.89	6.11
wt_uasgfp	wt_uasgfp6222	wt_uasgfp19.lsm (cropped)	3.04	19.59	2.42
wt_uasgfp	wt_uasgfp6232	wt_uasgfp19.lsm (cropped)	1.56	18.46	3.4
wt_uasgfp	wt_uasgfp6233	wt_uasgfp19.lsm (cropped)	2.86	18.77	3.87
wt_uasgfp	wt_uasgfp6245	wt_uasgfp19.lsm (cropped)	1.66	19.8	2.98
wt_uasgfp	wt_uasgfp6247	wt_uasgfp19.lsm (cropped)	0.976	17.8	8.98
wt_uasgfp	wt_uasgfp6254	wt_uasgfp19.lsm (cropped)	3.12	20.12	2.36
wt_uasgfp	wt_uasgfp6256	wt_uasgfp19.lsm (cropped)	0.255	16.79	9.76
wt_uasgfp	wt_uasgfp6262	wt_uasgfp19.lsm (cropped)	1.4	19.07	4.92
wt_uasgfp	wt_uasgfp6265	wt_uasgfp19.lsm (cropped)	2.34	18.93	3.58
wt_uasgfp	wt_uasgfp6274	wt_uasgfp19.lsm (cropped)	0.66	16.94	12.95
wt_uasgfp	wt_uasgfp6299	wt_uasgfp19.lsm (cropped)	0.292	17.52	12.72
wt_uasgfp	wt_uasgfp6302	wt_uasgfp19.lsm (cropped)	0.614	16.91	3.87
wt_uasgfp	wt_uasgfp6312	wt_uasgfp19.lsm (cropped)	0.249	16.21	8.6
wt_uasgfp	wt_uasgfp6315	wt_uasgfp19.lsm (cropped)	0.544	17.44	13.73
wt_uasgfp	wt_uasgfp6319	wt_uasgfp19.lsm (cropped)	6.48	21.9	2.48
wt_uasgfp	wt_uasgfp6335	wt_uasgfp19.lsm (cropped)	0.557	18.5	9.14
wt_uasgfp	wt_uasgfp6368	wt_uasgfp19.lsm (cropped)	0.42	18.09	10.71
wt_uasgfp	wt_uasgfp6373	wt_uasgfp19.lsm (cropped)	6.04	21.12	2.1
wt_uasgfp	wt_uasgfp6378	wt_uasgfp19.lsm (cropped)	2.24	20.15	2.87
wt_uasgfp	wt_uasgfp6381	wt_uasgfp19.lsm (cropped)	6.34	22.69	10.42
wt_uasgfp	wt_uasgfp6389	wt_uasgfp19.lsm (cropped)	2.65	18.66	5.87
wt_uasgfp	wt_uasgfp6393	wt_uasgfp19.lsm (cropped)	4.43	22.01	13.71
wt_uasgfp	wt_uasgfp6396	wt_uasgfp19.lsm (cropped)	1.92	18.55	10.95
wt_uasgfp	wt_uasgfp6400	wt_uasgfp19.lsm (cropped)	0.301	16.98	7.37
wt_uasgfp	wt_uasgfp6406	wt_uasgfp19.lsm (cropped)	11.34	22.47	3.3
wt_uasgfp	wt_uasgfp6411	wt_uasgfp19.lsm (cropped)	2.6	18.87	8.05
wt_uasgfp	wt_uasgfp6416	wt_uasgfp19.lsm (cropped)	1.88	18.31	20.28
wt_uasgfp	wt_uasgfp6417	wt_uasgfp19.lsm (cropped)	1.15	17.63	3.82
wt_uasgfp	wt_uasgfp7854	wt_uasgfp22.lsm (cropped)	1.56	57.42	41.07
wt_uasgfp	wt_uasgfp7867	wt_uasgfp22.lsm (cropped)	0.237	41.03	10.36
wt_uasgfp	wt_uasgfp7868	wt_uasgfp22.lsm (cropped)	2.12	52.68	17.94
wt_uasgfp	wt_uasgfp7885	wt_uasgfp22.lsm (cropped)	0.438	44.6	25.49
wt_uasgfp	wt_uasgfp7886	wt_uasgfp22.lsm (cropped)	2.71	49.19	16.76
wt_uasgfp	wt_uasgfp7911	wt_uasgfp22.lsm (cropped)	1.76	44.87	14.47
wt_uasgfp	wt_uasgfp7915	wt_uasgfp22.lsm (cropped)	1.83	40.2	41.82
wt_uasgfp	wt_uasgfp7921	wt_uasgfp22.lsm (cropped)	0.776	43.42	15.27
wt_uasgfp	wt_uasgfp7927	wt_uasgfp22.lsm (cropped)	0.408	40.9	18.22
wt_uasgfp	wt_uasgfp7928	wt_uasgfp22.lsm (cropped)	1.37	44.24	10.16
wt_uasgfp	wt_uasgfp7934	wt_uasgfp22.lsm (cropped)	2.07	51.1	12.66
wt_uasgfp	wt_uasgfp7937	wt_uasgfp22.lsm (cropped)	0.988	44.23	17.84
wt_uasgfp	wt_uasgfp7943	wt_uasgfp22.lsm (cropped)	0.304	38.74	8.13
wt_uasgfp	wt_uasgfp7946	wt_uasgfp22.lsm (cropped)	1.55	47.22	27.91
wt_uasgfp	wt_uasgfp7947	wt_uasgfp22.lsm (cropped)	10.57	58.97	13.49
wt_uasgfp	wt_uasgfp7950	wt_uasgfp22.lsm (cropped)	2.16	41.56	15.43
wt_uasgfp	wt_uasgfp7956	wt_uasgfp22.lsm (cropped)	0.341	40.11	12.5
wt_uasgfp	wt_uasgfp7958	wt_uasgfp22.lsm (cropped)	4.44	45.81	3.79
wt_uasgfp	wt_uasgfp7973	wt_uasgfp22.lsm (cropped)	1.04	46.06	12.91
wt_uasgfp	wt_uasgfp7974	wt_uasgfp22.lsm (cropped)	7.58	55.18	18.04
wt_uasgfp	wt_uasgfp7975	wt_uasgfp22.lsm (cropped)	1.39	40.26	14.61
wt_uasgfp	wt_uasgfp7977	wt_uasgfp22.lsm (cropped)	5.88	59.99	5.83
wt_uasgfp	wt_uasgfp7983	wt_uasgfp22.lsm (cropped)	1.06	42.61	14.84
wt_uasgfp	wt_uasgfp7985	wt_uasgfp22.lsm (cropped)	8.03	48.33	21.38
wt_uasgfp	wt_uasgfp7986	wt_uasgfp22.lsm (cropped)	3.07	47.84	13.96
wt_uasgfp	wt_uasgfp7996	wt_uasgfp22.lsm (cropped)	11.03	67.84	4
wt_uasgfp	wt_uasgfp7999	wt_uasgfp22.lsm (cropped)	4.16	53.91	19.5
wt_uasgfp	wt_uasgfp8000	wt_uasgfp22.lsm (cropped)	8.47	58.63	5.45
wt_uasgfp	wt_uasgfp8002	wt_uasgfp22.lsm (cropped)	7.79	54.61	11.43
wt_uasgfp	wt_uasgfp8006	wt_uasgfp22.lsm (cropped)	8.86	56.02	6.98
wt_uasgfp	wt_uasgfp8007	wt_uasgfp22.lsm (cropped)	2.04	50.79	11.28
wt_uasgfp	wt_uasgfp8050	wt_uasgfp22.lsm (cropped)	0.246	40.95	5.65
wt_uasgfp	wt_uasgfp8067	wt_uasgfp22.lsm (cropped)	5.93	53.63	11.61
wt_uasgfp	wt_uasgfp8068	wt_uasgfp22.lsm (cropped)	6.39	55.75	21.42
wt_uasgfp	wt_uasgfp8072	wt_uasgfp22.lsm (cropped)	7.24	60.76	5.81
wt_uasgfp	wt_uasgfp8073	wt_uasgfp22.lsm (cropped)	0.219	40.01	25
wt_uasgfp	wt_uasgfp8077	wt_uasgfp22.lsm (cropped)	4.95	54.31	4.47
wt_uasgfp	wt_uasgfp8080	wt_uasgfp22.lsm (cropped)	5.65	54.81	30.01
wt_uasgfp	wt_uasgfp8081	wt_uasgfp22.lsm (cropped)	2.4	47.57	35.82
wt_uasgfp	wt_uasgfp8084	wt_uasgfp22.lsm (cropped)	2.37	44.01	16.64
wt_uasgfp	wt_uasgfp8093	wt_uasgfp22.lsm (cropped)	3.98	48.05	27.98
wt_uasgfp	wt_uasgfp8095	wt_uasgfp22.lsm (cropped)	3.26	48.13	11.08
wt_uasgfp	wt_uasgfp8101	wt_uasgfp22.lsm (cropped)	2.52	44.14	4.66
wt_uasgfp	wt_uasgfp8107	wt_uasgfp22.lsm (cropped)	0.815	40.43	9.58
wt_uasgfp	wt_uasgfp8116	wt_uasgfp22.lsm (cropped)	1.26	40.72	6.37
wt_uasgfp	wt_uasgfp8117	wt_uasgfp22.lsm (cropped)	17.1	58.11	4.75
wt_uasgfp	wt_uasgfp8118	wt_uasgfp22.lsm (cropped)	9.19	56.36	5.41
wt_uasgfp	wt_uasgfp8128	wt_uasgfp22.lsm (cropped)	0.231	41.55	7.68
homo_uasgfp	homo_uasgfp1267	homo_uasgfp03.lsm (cropped)	1.98	73.67	65.24
homo_uasgfp	homo_uasgfp1272	homo_uasgfp03.lsm (cropped)	0.547	62.23	35.87
homo_uasgfp	homo_uasgfp1275	homo_uasgfp03.lsm (cropped)	0.529	55.6	41.86
homo_uasgfp	homo_uasgfp1280	homo_uasgfp03.lsm (cropped)	0.532	63.03	5.57
homo_uasgfp	homo_uasgfp1285	homo_uasgfp03.lsm (cropped)	0.547	51.03	87.87
homo_uasgfp	homo_uasgfp1292	homo_uasgfp03.lsm (cropped)	0.958	56.3	48.14
homo_uasgfp	homo_uasgfp1295	homo_uasgfp03.lsm (cropped)	0.587	48.02	156.61
homo_uasgfp	homo_uasgfp1303	homo_uasgfp03.lsm (cropped)	0.319	47.77	90.46
homo_uasgfp	homo_uasgfp1311	homo_uasgfp03.lsm (cropped)	0.663	50.62	62.04
homo_uasgfp	homo_uasgfp1313	homo_uasgfp03.lsm (cropped)	4.26	63.3	17.58
homo_uasgfp	homo_uasgfp1317	homo_uasgfp03.lsm (cropped)	0.359	44.12	128.2
homo_uasgfp	homo_uasgfp1328	homo_uasgfp03.lsm (cropped)	0.408	47.89	14.95
homo_uasgfp	homo_uasgfp1333	homo_uasgfp03.lsm (cropped)	0.24	48.16	32.49
homo_uasgfp	homo_uasgfp1336	homo_uasgfp03.lsm (cropped)	2.1	58.39	8.52
homo_uasgfp	homo_uasgfp1339	homo_uasgfp03.lsm (cropped)	1.36	53.63	68.69
homo_uasgfp	homo_uasgfp1364	homo_uasgfp03.lsm (cropped)	0.557	47.43	80.42
homo_uasgfp	homo_uasgfp1368	homo_uasgfp03.lsm (cropped)	0.435	49.9	104.4
homo_uasgfp	homo_uasgfp1379	homo_uasgfp03.lsm (cropped)	1.35	52.64	50.27
homo_uasgfp	homo_uasgfp1402	homo_uasgfp03.lsm (cropped)	0.973	48.63	26.02
homo_uasgfp	homo_uasgfp1411	homo_uasgfp03.lsm (cropped)	0.791	50.76	45.8
homo_uasgfp	homo_uasgfp1413	homo_uasgfp03.lsm (cropped)	4.64	58.79	50.77
homo_uasgfp	homo_uasgfp1414	homo_uasgfp03.lsm (cropped)	0.331	50.87	13.04
homo_uasgfp	homo_uasgfp1418	homo_uasgfp03.lsm (cropped)	0.481	49.27	5.75
homo_uasgfp	homo_uasgfp1426	homo_uasgfp03.lsm (cropped)	5.4	61.88	30.65
homo_uasgfp	homo_uasgfp1434	homo_uasgfp03.lsm (cropped)	7.45	64.64	5.36
homo_uasgfp	homo_uasgfp1435	homo_uasgfp03.lsm (cropped)	0.262	44.38	18.27
homo_uasgfp	homo_uasgfp1437	homo_uasgfp03.lsm (cropped)	6.32	69.71	47.83
homo_uasgfp	homo_uasgfp1444	homo_uasgfp03.lsm (cropped)	0.766	49.35	8.97
homo_uasgfp	homo_uasgfp1460	homo_uasgfp03.lsm (cropped)	0.204	44.34	43.12
homo_uasgfp	homo_uasgfp1477	homo_uasgfp03.lsm (cropped)	3.93	62.76	28.44
homo_uasgfp	homo_uasgfp1505	homo_uasgfp03.lsm (cropped)	5.54	57.67	46.12
homo_uasgfp	homo_uasgfp1512	homo_uasgfp03.lsm (cropped)	13.76	76.32	14.31
homo_uasgfp	homo_uasgfp1515	homo_uasgfp03.lsm (cropped)	4.35	54.15	13.41
homo_uasgfp	homo_uasgfp1517	homo_uasgfp03.lsm (cropped)	6.73	57.62	14.45
homo_uasgfp	homo_uasgfp1520	homo_uasgfp03.lsm (cropped)	1.3	47.36	7.35
homo_uasgfp	homo_uasgfp1526	homo_uasgfp03.lsm (cropped)	3.99	53.57	6.6
homo_uasgfp	homo_uasgfp1545	homo_uasgfp03.lsm (cropped)	0.535	45.3	78.83
homo_uasgfp	homo_uasgfp1553	homo_uasgfp03.lsm (cropped)	2.3	52.13	62.88
homo_uasgfp	homo_uasgfp1554	homo_uasgfp03.lsm (cropped)	1.61	50.09	12.55
homo_uasgfp	homo_uasgfp1556	homo_uasgfp03.lsm (cropped)	11.57	57.74	52.65
homo_uasgfp	homo_uasgfp1559	homo_uasgfp03.lsm (cropped)	1.89	56.38	36.84
homo_uasgfp	homo_uasgfp1564	homo_uasgfp03.lsm (cropped)	2.82	55.73	6.27
homo_uasgfp	homo_uasgfp1566	homo_uasgfp03.lsm (cropped)	9.86	63.66	14.03
homo_uasgfp	homo_uasgfp1576	homo_uasgfp03.lsm (cropped)	2.56	50.4	17.61
homo_uasgfp	homo_uasgfp1577	homo_uasgfp03.lsm (cropped)	2.41	50.61	7.16
homo_uasgfp	homo_uasgfp1579	homo_uasgfp03.lsm (cropped)	0.55	45.9	19.17
homo_uasgfp	homo_uasgfp1581	homo_uasgfp03.lsm (cropped)	7.67	56.64	14.3
homo_uasgfp	homo_uasgfp1585	homo_uasgfp03.lsm (cropped)	5.71	57.7	34.35
homo_uasgfp	homo_uasgfp1586	homo_uasgfp03.lsm (cropped)	4.88	58.11	21.17
homo_uasgfp	homo_uasgfp1587	homo_uasgfp03.lsm (cropped)	12.06	60.19	45.71
homo_uasgfp	homo_uasgfp1593	homo_uasgfp03.lsm (cropped)	0.663	47.88	6.3
homo_uasgfp	homo_uasgfp1594	homo_uasgfp03.lsm (cropped)	2.36	49.7	7.83
homo_uasgfp	homo_uasgfp1599	homo_uasgfp03.lsm (cropped)	1.58	50.29	18.84
homo_uasgfp	homo_uasgfp1602	homo_uasgfp03.lsm (cropped)	0.87	47.12	47.97
homo_uasgfp	homo_uasgfp1604	homo_uasgfp03.lsm (cropped)	3.45	55.18	6.12
homo_uasgfp	homo_uasgfp1611	homo_uasgfp03.lsm (cropped)	0.359	44.52	8.64
homo_uasgfp	homo_uasgfp1621	homo_uasgfp03.lsm (cropped)	2.67	63.92	26.77
homo_uasgfp	homo_uasgfp1622	homo_uasgfp03.lsm (cropped)	13.33	73.74	26.51
homo_uasgfp	homo_uasgfp1626	homo_uasgfp03.lsm (cropped)	0.809	47.7	87.8
homo_uasgfp	homo_uasgfp1631	homo_uasgfp03.lsm (cropped)	8.39	62.37	13.04
homo_uasgfp	homo_uasgfp1635	homo_uasgfp03.lsm (cropped)	3.71	55.62	21.6
homo_uasgfp	homo_uasgfp3229	homo_uasgfp04.lsm (cropped)	0.438	78.78	233.31
homo_uasgfp	homo_uasgfp3231	homo_uasgfp04.lsm (cropped)	1.07	78.56	200.18
homo_uasgfp	homo_uasgfp3239	homo_uasgfp04.lsm (cropped)	1.16	81.76	218.11
homo_uasgfp	homo_uasgfp3240	homo_uasgfp04.lsm (cropped)	1.16	77.68	202.1
homo_uasgfp	homo_uasgfp3244	homo_uasgfp04.lsm (cropped)	0.28	65.63	171.37
homo_uasgfp	homo_uasgfp3246	homo_uasgfp04.lsm (cropped)	0.386	67.48	231.18
homo_uasgfp	homo_uasgfp3249	homo_uasgfp04.lsm (cropped)	1.22	76.56	239.34
homo_uasgfp	homo_uasgfp3253	homo_uasgfp04.lsm (cropped)	0.462	76.85	204.75
homo_uasgfp	homo_uasgfp3259	homo_uasgfp04.lsm (cropped)	0.365	67.83	250.7
homo_uasgfp	homo_uasgfp3264	homo_uasgfp04.lsm (cropped)	2.29	73.75	21.2
homo_uasgfp	homo_uasgfp3267	homo_uasgfp04.lsm (cropped)	2.41	94.91	100.54
homo_uasgfp	homo_uasgfp3274	homo_uasgfp04.lsm (cropped)	0.386	68.09	202.09
homo_uasgfp	homo_uasgfp3279	homo_uasgfp04.lsm (cropped)	0.225	68.96	193.23
homo_uasgfp	homo_uasgfp3285	homo_uasgfp04.lsm (cropped)	1.61	81.49	28.93
homo_uasgfp	homo_uasgfp3294	homo_uasgfp04.lsm (cropped)	1.66	73.02	62.49
homo_uasgfp	homo_uasgfp3298	homo_uasgfp04.lsm (cropped)	0.544	68.68	16.9
homo_uasgfp	homo_uasgfp3310	homo_uasgfp04.lsm (cropped)	0.937	77.86	47.72
homo_uasgfp	homo_uasgfp3311	homo_uasgfp04.lsm (cropped)	0.715	71.48	46.28
homo_uasgfp	homo_uasgfp3330	homo_uasgfp04.lsm (cropped)	1.15	70.2	15.31
homo_uasgfp	homo_uasgfp3340	homo_uasgfp04.lsm (cropped)	3.71	97.34	17.24
homo_uasgfp	homo_uasgfp3341	homo_uasgfp04.lsm (cropped)	2.46	92.88	34.42
homo_uasgfp	homo_uasgfp3355	homo_uasgfp04.lsm (cropped)	3.36	79.25	79.06
homo_uasgfp	homo_uasgfp3359	homo_uasgfp04.lsm (cropped)	2.53	71.19	15.35
homo_uasgfp	homo_uasgfp3360	homo_uasgfp04.lsm (cropped)	3.3	76.02	7.84
homo_uasgfp	homo_uasgfp3370	homo_uasgfp04.lsm (cropped)	0.891	75.28	53.4
homo_uasgfp	homo_uasgfp3377	homo_uasgfp04.lsm (cropped)	1.41	87.91	191.39
homo_uasgfp	homo_uasgfp3389	homo_uasgfp04.lsm (cropped)	5.99	89.45	112.33
homo_uasgfp	homo_uasgfp3390	homo_uasgfp04.lsm (cropped)	0.748	65.47	83.03
homo_uasgfp	homo_uasgfp3411	homo_uasgfp04.lsm (cropped)	3.16	80.47	44.76
homo_uasgfp	homo_uasgfp3412	homo_uasgfp04.lsm (cropped)	0.219	65.51	220.9
homo_uasgfp	homo_uasgfp3415	homo_uasgfp04.lsm (cropped)	0.681	62.56	188.64
homo_uasgfp	homo_uasgfp3418	homo_uasgfp04.lsm (cropped)	0.885	70.25	36.44
homo_uasgfp	homo_uasgfp3420	homo_uasgfp04.lsm (cropped)	4.53	91.84	7.15
homo_uasgfp	homo_uasgfp3432	homo_uasgfp04.lsm (cropped)	0.249	66.95	172.62
homo_uasgfp	homo_uasgfp3436	homo_uasgfp04.lsm (cropped)	0.815	64.26	67.16
homo_uasgfp	homo_uasgfp3439	homo_uasgfp04.lsm (cropped)	1.92	69.54	42.66
homo_uasgfp	homo_uasgfp3440	homo_uasgfp04.lsm (cropped)	0.955	63.97	55.25
homo_uasgfp	homo_uasgfp3445	homo_uasgfp04.lsm (cropped)	0.401	63.02	129.18
homo_uasgfp	homo_uasgfp3446	homo_uasgfp04.lsm (cropped)	0.611	67.07	158.4
homo_uasgfp	homo_uasgfp3451	homo_uasgfp04.lsm (cropped)	0.201	69.47	23.02
homo_uasgfp	homo_uasgfp3457	homo_uasgfp04.lsm (cropped)	2.94	67.52	16.21
homo_uasgfp	homo_uasgfp3458	homo_uasgfp04.lsm (cropped)	1.98	66.71	15.48
homo_uasgfp	homo_uasgfp3463	homo_uasgfp04.lsm (cropped)	0.456	64.7	174.91
homo_uasgfp	homo_uasgfp3464	homo_uasgfp04.lsm (cropped)	4.29	79.88	91.56
homo_uasgfp	homo_uasgfp3465	homo_uasgfp04.lsm (cropped)	1.7	76.4	54.76
homo_uasgfp	homo_uasgfp3467	homo_uasgfp04.lsm (cropped)	2.14	79.26	175.9
homo_uasgfp	homo_uasgfp3468	homo_uasgfp04.lsm (cropped)	0.265	64.34	42.2
homo_uasgfp	homo_uasgfp3477	homo_uasgfp04.lsm (cropped)	5.33	87.22	57.32
homo_uasgfp	homo_uasgfp3483	homo_uasgfp04.lsm (cropped)	1.9	85.24	34.46
homo_uasgfp	homo_uasgfp3485	homo_uasgfp04.lsm (cropped)	8.2	86.97	112.43
homo_uasgfp	homo_uasgfp3486	homo_uasgfp04.lsm (cropped)	9.02	81.08	52.65
homo_uasgfp	homo_uasgfp3490	homo_uasgfp04.lsm (cropped)	5.36	79	28.54
homo_uasgfp	homo_uasgfp3491	homo_uasgfp04.lsm (cropped)	2.14	71.41	119.04
homo_uasgfp	homo_uasgfp3494	homo_uasgfp04.lsm (cropped)	2.91	78.9	18.73
homo_uasgfp	homo_uasgfp3497	homo_uasgfp04.lsm (cropped)	8.36	84.33	55.44
homo_uasgfp	homo_uasgfp3500	homo_uasgfp04.lsm (cropped)	5.6	72.51	132.66
homo_uasgfp	homo_uasgfp3501	homo_uasgfp04.lsm (cropped)	11.22	92.26	112.72
homo_uasgfp	homo_uasgfp3502	homo_uasgfp04.lsm (cropped)	16.93	90.07	56.24
homo_uasgfp	homo_uasgfp3508	homo_uasgfp04.lsm (cropped)	17.2	112.91	78.35
homo_uasgfp	homo_uasgfp3511	homo_uasgfp04.lsm (cropped)	2.34	80.4	19.48
homo_uasgfp	homo_uasgfp3515	homo_uasgfp04.lsm (cropped)	7.82	85.78	30.02
homo_uasgfp	homo_uasgfp3519	homo_uasgfp04.lsm (cropped)	9.78	81.74	14.05
homo_uasgfp	homo_uasgfp3522	homo_uasgfp04.lsm (cropped)	9.84	83.07	89.95
homo_uasgfp	homo_uasgfp3525	homo_uasgfp04.lsm (cropped)	2.36	69.29	57.58
homo_uasgfp	homo_uasgfp3527	homo_uasgfp04.lsm (cropped)	5.53	72.56	47.55
homo_uasgfp	homo_uasgfp3535	homo_uasgfp04.lsm (cropped)	0.274	64.17	44
homo_uasgfp	homo_uasgfp3543	homo_uasgfp04.lsm (cropped)	9.05	85.61	41.17
homo_uasgfp	homo_uasgfp5019	homo_uasgfp09.lsm (cropped)	0.408	86	7.64
homo_uasgfp	homo_uasgfp5020	homo_uasgfp09.lsm (cropped)	0.985	61.34	6.73
homo_uasgfp	homo_uasgfp5024	homo_uasgfp09.lsm (cropped)	1.68	59	22.11
homo_uasgfp	homo_uasgfp5025	homo_uasgfp09.lsm (cropped)	0.575	55.41	193.41
homo_uasgfp	homo_uasgfp5032	homo_uasgfp09.lsm (cropped)	1.73	60.94	94.96
homo_uasgfp	homo_uasgfp5048	homo_uasgfp09.lsm (cropped)	1.2	60.67	9.49
homo_uasgfp	homo_uasgfp5058	homo_uasgfp09.lsm (cropped)	1.27	73.06	12.62
homo_uasgfp	homo_uasgfp5074	homo_uasgfp09.lsm (cropped)	0.237	85.58	24.73
homo_uasgfp	homo_uasgfp5080	homo_uasgfp09.lsm (cropped)	1.92	70.01	9.78
homo_uasgfp	homo_uasgfp5098	homo_uasgfp09.lsm (cropped)	1.19	61.53	8.33
homo_uasgfp	homo_uasgfp5103	homo_uasgfp09.lsm (cropped)	0.204	55.24	82.04
homo_uasgfp	homo_uasgfp5114	homo_uasgfp09.lsm (cropped)	0.231	53.25	25.5
homo_uasgfp	homo_uasgfp5126	homo_uasgfp09.lsm (cropped)	1.48	65.59	19.77
homo_uasgfp	homo_uasgfp5131	homo_uasgfp09.lsm (cropped)	1.85	58.33	22.19
homo_uasgfp	homo_uasgfp5132	homo_uasgfp09.lsm (cropped)	0.915	64.13	93.11
homo_uasgfp	homo_uasgfp5133	homo_uasgfp09.lsm (cropped)	4.38	75.32	19.1
homo_uasgfp	homo_uasgfp5139	homo_uasgfp09.lsm (cropped)	1.24	57.91	24.23
homo_uasgfp	homo_uasgfp5142	homo_uasgfp09.lsm (cropped)	0.289	55.14	67.24
homo_uasgfp	homo_uasgfp5144	homo_uasgfp09.lsm (cropped)	3.34	76.02	4.77
homo_uasgfp	homo_uasgfp5151	homo_uasgfp09.lsm (cropped)	0.928	60.66	56.78
homo_uasgfp	homo_uasgfp5159	homo_uasgfp09.lsm (cropped)	0.882	62.83	5.86
homo_uasgfp	homo_uasgfp5165	homo_uasgfp09.lsm (cropped)	5.55	74.91	28.01
homo_uasgfp	homo_uasgfp5189	homo_uasgfp09.lsm (cropped)	2.99	74.58	6.55
homo_uasgfp	homo_uasgfp5190	homo_uasgfp09.lsm (cropped)	5.58	77.49	9.6
homo_uasgfp	homo_uasgfp5193	homo_uasgfp09.lsm (cropped)	1.9	60.56	35.11
homo_uasgfp	homo_uasgfp5194	homo_uasgfp09.lsm (cropped)	0.259	54.24	26.47
homo_uasgfp	homo_uasgfp5195	homo_uasgfp09.lsm (cropped)	0.216	55.79	46.96
homo_uasgfp	homo_uasgfp5197	homo_uasgfp09.lsm (cropped)	0.55	58.93	8.63
homo_uasgfp	homo_uasgfp5230	homo_uasgfp09.lsm (cropped)	0.991	55.62	7.86
homo_uasgfp	homo_uasgfp5231	homo_uasgfp09.lsm (cropped)	3.51	67.25	9.12
homo_uasgfp	homo_uasgfp5234	homo_uasgfp09.lsm (cropped)	6.46	68.99	4.58
homo_uasgfp	homo_uasgfp5238	homo_uasgfp09.lsm (cropped)	2.14	63.65	14.8
homo_uasgfp	homo_uasgfp5247	homo_uasgfp09.lsm (cropped)	1.11	59.59	55.42
homo_uasgfp	homo_uasgfp5251	homo_uasgfp09.lsm (cropped)	2.1	67.12	24.11
homo_uasgfp	homo_uasgfp5253	homo_uasgfp09.lsm (cropped)	1.21	58.96	40.06
homo_uasgfp	homo_uasgfp5259	homo_uasgfp09.lsm (cropped)	1.12	61.67	47.24
homo_uasgfp	homo_uasgfp5260	homo_uasgfp09.lsm (cropped)	1.68	63.72	13.45
homo_uasgfp	homo_uasgfp5269	homo_uasgfp09.lsm (cropped)	2.81	68.38	56.17
homo_uasgfp	homo_uasgfp5271	homo_uasgfp09.lsm (cropped)	3.63	69.33	9.26
homo_uasgfp	homo_uasgfp5275	homo_uasgfp09.lsm (cropped)	8.56	74.59	29.83
homo_uasgfp	homo_uasgfp5277	homo_uasgfp09.lsm (cropped)	9.02	76.65	31.44
homo_uasgfp	homo_uasgfp5280	homo_uasgfp09.lsm (cropped)	10.11	80.35	24.1
homo_uasgfp	homo_uasgfp5290	homo_uasgfp09.lsm (cropped)	0.274	60.97	30.69
homo_uasgfp	homo_uasgfp5296	homo_uasgfp09.lsm (cropped)	16.31	89.09	14.68
homo_uasgfp	homo_uasgfp5303	homo_uasgfp09.lsm (cropped)	0.657	58.58	10.51
homo_uasgfp	homo_uasgfp5306	homo_uasgfp09.lsm (cropped)	3.18	60.01	27.59
homo_uasgfp	homo_uasgfp5308	homo_uasgfp09.lsm (cropped)	2.75	63.44	28.94
homo_uasgfp	homo_uasgfp5319	homo_uasgfp09.lsm (cropped)	2.18	60.25	15.56
homo_uasgfp	homo_uasgfp5320	homo_uasgfp09.lsm (cropped)	3.86	70.92	34.63
homo_uasgfp	homo_uasgfp7289	homo_uasgfp11.lsm (cropped)	0.259	34.27	47.72
homo_uasgfp	homo_uasgfp7292	homo_uasgfp11.lsm (cropped)	0.541	35.54	14.15
homo_uasgfp	homo_uasgfp7298	homo_uasgfp11.lsm (cropped)	1.1	40.66	30.52
homo_uasgfp	homo_uasgfp7299	homo_uasgfp11.lsm (cropped)	2.58	43.72	11.08
homo_uasgfp	homo_uasgfp7300	homo_uasgfp11.lsm (cropped)	0.699	34.97	73.33
homo_uasgfp	homo_uasgfp7301	homo_uasgfp11.lsm (cropped)	0.83	36.17	4.42
homo_uasgfp	homo_uasgfp7302	homo_uasgfp11.lsm (cropped)	0.268	35.01	8.01
homo_uasgfp	homo_uasgfp7303	homo_uasgfp11.lsm (cropped)	0.782	38.6	11.07
homo_uasgfp	homo_uasgfp7305	homo_uasgfp11.lsm (cropped)	0.356	36.44	50.38
homo_uasgfp	homo_uasgfp7310	homo_uasgfp11.lsm (cropped)	0.465	36.88	78.96
homo_uasgfp	homo_uasgfp7319	homo_uasgfp11.lsm (cropped)	1.47	38.77	6.84
homo_uasgfp	homo_uasgfp7326	homo_uasgfp11.lsm (cropped)	2.59	44.63	27.04
homo_uasgfp	homo_uasgfp7328	homo_uasgfp11.lsm (cropped)	6.02	47.62	31.33
homo_uasgfp	homo_uasgfp7341	homo_uasgfp11.lsm (cropped)	0.347	35.5	90.4
homo_uasgfp	homo_uasgfp7342	homo_uasgfp11.lsm (cropped)	0.298	35.12	33.55
homo_uasgfp	homo_uasgfp7343	homo_uasgfp11.lsm (cropped)	1.1	38.3	60.71
homo_uasgfp	homo_uasgfp7345	homo_uasgfp11.lsm (cropped)	2.86	41.19	38.31
homo_uasgfp	homo_uasgfp7354	homo_uasgfp11.lsm (cropped)	1.4	40.22	7.15
homo_uasgfp	homo_uasgfp7360	homo_uasgfp11.lsm (cropped)	0.608	33.31	46.63
homo_uasgfp	homo_uasgfp7364	homo_uasgfp11.lsm (cropped)	1.86	37.08	6.61
homo_uasgfp	homo_uasgfp7372	homo_uasgfp11.lsm (cropped)	0.414	34.59	79.13
homo_uasgfp	homo_uasgfp7377	homo_uasgfp11.lsm (cropped)	8.5	51.73	20.51
homo_uasgfp	homo_uasgfp7380	homo_uasgfp11.lsm (cropped)	4	42.65	47.81
homo_uasgfp	homo_uasgfp7383	homo_uasgfp11.lsm (cropped)	0.42	36.33	16.05
homo_uasgfp	homo_uasgfp7384	homo_uasgfp11.lsm (cropped)	7.92	43.77	5.97
homo_uasgfp	homo_uasgfp7391	homo_uasgfp11.lsm (cropped)	0.438	35.57	16.42
homo_uasgfp	homo_uasgfp7394	homo_uasgfp11.lsm (cropped)	1.78	42.78	44.08
homo_uasgfp	homo_uasgfp7395	homo_uasgfp11.lsm (cropped)	1.49	35.79	23.06
homo_uasgfp	homo_uasgfp7396	homo_uasgfp11.lsm (cropped)	2.72	46.31	5.69
homo_uasgfp	homo_uasgfp7398	homo_uasgfp11.lsm (cropped)	0.42	34.46	87.69
homo_uasgfp	homo_uasgfp7403	homo_uasgfp11.lsm (cropped)	1.83	43.43	28.45
homo_uasgfp	homo_uasgfp7417	homo_uasgfp11.lsm (cropped)	8.11	54.08	3.75
homo_uasgfp	homo_uasgfp7419	homo_uasgfp11.lsm (cropped)	14.24	56.78	18.5
homo_uasgfp	homo_uasgfp7440	homo_uasgfp11.lsm (cropped)	3.22	40.82	5.62
homo_uasgfp	homo_uasgfp7441	homo_uasgfp11.lsm (cropped)	0.535	39.06	43.13
homo_uasgfp	homo_uasgfp7447	homo_uasgfp11.lsm (cropped)	1.02	36.7	4.34
homo_uasgfp	homo_uasgfp7457	homo_uasgfp11.lsm (cropped)	0.243	34.89	22.8
homo_uasgfp	homo_uasgfp7460	homo_uasgfp11.lsm (cropped)	3.55	43.47	19.9
homo_uasgfp	homo_uasgfp7461	homo_uasgfp11.lsm (cropped)	1.82	37.25	52.71
homo_uasgfp	homo_uasgfp7464	homo_uasgfp11.lsm (cropped)	3.22	41.92	19.32
homo_uasgfp	homo_uasgfp7465	homo_uasgfp11.lsm (cropped)	1.74	41.97	48.76
homo_uasgfp	homo_uasgfp7466	homo_uasgfp11.lsm (cropped)	1.38	39.63	28.78
homo_uasgfp	homo_uasgfp7476	homo_uasgfp11.lsm (cropped)	2.28	38.49	9.66
homo_uasgfp	homo_uasgfp7493	homo_uasgfp11.lsm (cropped)	2.38	36.68	10.74
homo_uasgfp	homo_uasgfp7495	homo_uasgfp11.lsm (cropped)	6.76	44.15	7.55
homo_uasgfp	homo_uasgfp7500	homo_uasgfp11.lsm (cropped)	4.78	47.25	12.67
homo_uasgfp	homo_uasgfp7503	homo_uasgfp11.lsm (cropped)	2.51	37.92	7.43
homo_uasgfp	homo_uasgfp7511	homo_uasgfp11.lsm (cropped)	2.12	38.48	7.34
homo_uasgfp	homo_uasgfp7523	homo_uasgfp11.lsm (cropped)	1.99	42	5.76
homo_uasgfp	homo_uasgfp7524	homo_uasgfp11.lsm (cropped)	2.29	39.18	7.47
homo_uasgfp	homo_uasgfp7536	homo_uasgfp11.lsm (cropped)	0.414	34.18	9.99
homo_uasgfp	homo_uasgfp7542	homo_uasgfp11.lsm (cropped)	1.82	36.38	12.03
homo_uasgfp	homo_uasgfp7546	homo_uasgfp11.lsm (cropped)	0.876	36.26	9.5
homo_uasgfp	homo_uasgfp7552	homo_uasgfp11.lsm (cropped)	1.27	42.71	9.65
homo_uasgfp	homo_uasgfp7556	homo_uasgfp11.lsm (cropped)	6.53	42.48	6.87
homo_uasgfp	homo_uasgfp7561	homo_uasgfp11.lsm (cropped)	0.563	36.05	105.22
homo_uasgfp	homo_uasgfp7564	homo_uasgfp11.lsm (cropped)	0.517	34.68	64.24
homo_uasgfp	homo_uasgfp7565	homo_uasgfp11.lsm (cropped)	0.87	35.32	80.46
homo_uasgfp	homo_uasgfp7566	homo_uasgfp11.lsm (cropped)	1.23	38.75	12.99
homo_uasgfp	homo_uasgfp7570	homo_uasgfp11.lsm (cropped)	3.45	41.6	14.31
homo_uasgfp	homo_uasgfp7575	homo_uasgfp11.lsm (cropped)	5.54	48.38	14.96
homo_uasgfp	homo_uasgfp7579	homo_uasgfp11.lsm (cropped)	16.37	49.42	5.07
homo_uasgfp	homo_uasgfp7587	homo_uasgfp11.lsm (cropped)	8.43	46.11	11.31
homo_uasgfp	homo_uasgfp7590	homo_uasgfp11.lsm (cropped)	4.02	41.5	4.37
homo_uasgfp	homo_uasgfp7596	homo_uasgfp11.lsm (cropped)	2.23	40.56	16.8
homo_uasgfp	homo_uasgfp7600	homo_uasgfp11.lsm (cropped)	14.02	45.38	7.45
homo_uasgfp	homo_uasgfp7601	homo_uasgfp11.lsm (cropped)	11.65	50.68	11.42
homo_uasgfp	homo_uasgfp7605	homo_uasgfp11.lsm (cropped)	19.67	46.28	4.56
homo_uasgfp	homo_uasgfp7606	homo_uasgfp11.lsm (cropped)	18.96	45.49	9.71
homo_uasgfp	homo_uasgfp7609	homo_uasgfp11.lsm (cropped)	10.47	48.31	9.35
homo_uasgfp	homo_uasgfp7613	homo_uasgfp11.lsm (cropped)	7.99	42.45	16.67
homo_uasgfp	homo_uasgfp7622	homo_uasgfp11.lsm (cropped)	1.88	48.06	10.21
homo_uasgfp	homo_uasgfp9030	homo_uasgfp12.lsm (cropped)	0.219	65.03	17.54
homo_uasgfp	homo_uasgfp9040	homo_uasgfp12.lsm (cropped)	1.76	102.22	17.8
homo_uasgfp	homo_uasgfp9066	homo_uasgfp12.lsm (cropped)	0.59	68.21	20.74
homo_uasgfp	homo_uasgfp9077	homo_uasgfp12.lsm (cropped)	0.322	62.87	17.75
homo_uasgfp	homo_uasgfp9101	homo_uasgfp12.lsm (cropped)	3.09	90.95	7.93
homo_uasgfp	homo_uasgfp9102	homo_uasgfp12.lsm (cropped)	5.01	97.85	20.09
homo_uasgfp	homo_uasgfp9107	homo_uasgfp12.lsm (cropped)	1.66	68.79	6.39
homo_uasgfp	homo_uasgfp9112	homo_uasgfp12.lsm (cropped)	0.444	69.34	9.88
homo_uasgfp	homo_uasgfp9124	homo_uasgfp12.lsm (cropped)	2.26	107.29	9.36
homo_uasgfp	homo_uasgfp9133	homo_uasgfp12.lsm (cropped)	0.879	92.27	87.61
homo_uasgfp	homo_uasgfp9134	homo_uasgfp12.lsm (cropped)	4.36	81.04	11.05
homo_uasgfp	homo_uasgfp9135	homo_uasgfp12.lsm (cropped)	5.71	90.91	3.62
homo_uasgfp	homo_uasgfp9137	homo_uasgfp12.lsm (cropped)	7.87	83.11	22.16
homo_uasgfp	homo_uasgfp9150	homo_uasgfp12.lsm (cropped)	1.85	116.57	43.62
homo_uasgfp	homo_uasgfp9155	homo_uasgfp12.lsm (cropped)	10.21	92.93	21.56
homo_uasgfp	homo_uasgfp9157	homo_uasgfp12.lsm (cropped)	0.842	68.92	5.81
homo_uasgfp	homo_uasgfp9158	homo_uasgfp12.lsm (cropped)	1.39	82.51	5.72
homo_uasgfp	homo_uasgfp9195	homo_uasgfp12.lsm (cropped)	1.77	86.21	6.8
homo_uasgfp	homo_uasgfp9204	homo_uasgfp12.lsm (cropped)	2.87	83.47	27.94
homo_uasgfp	homo_uasgfp9212	homo_uasgfp12.lsm (cropped)	3.34	86.77	7.64
homo_uasgfp	homo_uasgfp9222	homo_uasgfp12.lsm (cropped)	3.18	75.24	32.64
homo_uasgfp	homo_uasgfp9232	homo_uasgfp12.lsm (cropped)	4.02	89.06	2.89
homo_uasgfp	homo_uasgfp9239	homo_uasgfp12.lsm (cropped)	1.26	75.84	59.61
homo_uasgfp	homo_uasgfp9243	homo_uasgfp12.lsm (cropped)	1.33	71.18	3.25
homo_uasgfp	homo_uasgfp9245	homo_uasgfp12.lsm (cropped)	2.84	81.87	6.58
homo_uasgfp	homo_uasgfp9254	homo_uasgfp12.lsm (cropped)	3.04	77.99	28.06
homo_uasgfp	homo_uasgfp9258	homo_uasgfp12.lsm (cropped)	4.59	89.51	6.14
homo_uasgfp	homo_uasgfp9268	homo_uasgfp12.lsm (cropped)	3.22	75.34	13.23
homo_uasgfp	homo_uasgfp9271	homo_uasgfp12.lsm (cropped)	5.48	78.8	8.37
homo_uasgfp	homo_uasgfp9274	homo_uasgfp12.lsm (cropped)	1.49	73.16	11.73
homo_uasgfp	homo_uasgfp10969	homo_uasgfp13.lsm (cropped)	0.474	35.94	68.43
homo_uasgfp	homo_uasgfp10984	homo_uasgfp13.lsm (cropped)	2.01	39.76	7.94
homo_uasgfp	homo_uasgfp11053	homo_uasgfp13.lsm (cropped)	1.41	35.41	15.45
homo_uasgfp	homo_uasgfp11055	homo_uasgfp13.lsm (cropped)	3.14	37.82	7.76
homo_uasgfp	homo_uasgfp11079	homo_uasgfp13.lsm (cropped)	1.62	35.41	15.33
homo_uasgfp	homo_uasgfp11083	homo_uasgfp13.lsm (cropped)	0.824	37.86	62.47
homo_uasgfp	homo_uasgfp11123	homo_uasgfp13.lsm (cropped)	1.44	35.85	19.02
homo_uasgfp	homo_uasgfp11127	homo_uasgfp13.lsm (cropped)	2.62	40.27	4.67
homo_uasgfp	homo_uasgfp11149	homo_uasgfp13.lsm (cropped)	0.328	31.14	54.65
homo_uasgfp	homo_uasgfp11161	homo_uasgfp13.lsm (cropped)	1.65	38.46	69.31
homo_uasgfp	homo_uasgfp11164	homo_uasgfp13.lsm (cropped)	0.265	32.49	26.22
homo_uasgfp	homo_uasgfp11173	homo_uasgfp13.lsm (cropped)	2.55	35.63	11.01
homo_uasgfp	homo_uasgfp11182	homo_uasgfp13.lsm (cropped)	0.511	32.32	17.79
homo_uasgfp	homo_uasgfp11189	homo_uasgfp13.lsm (cropped)	1.01	33.81	20.36
homo_uasgfp	homo_uasgfp11191	homo_uasgfp13.lsm (cropped)	1.02	32.57	22.75
homo_uasgfp	homo_uasgfp11192	homo_uasgfp13.lsm (cropped)	2.26	34.01	18.71
homo_uasgfp	homo_uasgfp11194	homo_uasgfp13.lsm (cropped)	2.42	38.59	20.57
homo_uasgfp	homo_uasgfp11195	homo_uasgfp13.lsm (cropped)	3.59	38.96	19.77
homo_uasgfp	homo_uasgfp11196	homo_uasgfp13.lsm (cropped)	1.55	37.13	50.87
homo_uasgfp	homo_uasgfp11198	homo_uasgfp13.lsm (cropped)	0.277	30.46	10.51
homo_uasgfp	homo_uasgfp11229	homo_uasgfp13.lsm (cropped)	2.99	44.81	18.62
homo_uasgfp	homo_uasgfp11241	homo_uasgfp13.lsm (cropped)	0.599	35.43	6.53
homo_uasgfp	homo_uasgfp11244	homo_uasgfp13.lsm (cropped)	3.76	34.42	3.21
homo_uasgfp	homo_uasgfp11248	homo_uasgfp13.lsm (cropped)	2.18	37.44	21.62
homo_uasgfp	homo_uasgfp11256	homo_uasgfp13.lsm (cropped)	8.72	40.56	11.39
homo_uasgfp	homo_uasgfp11257	homo_uasgfp13.lsm (cropped)	1.38	47.43	10.57
homo_uasgfp	homo_uasgfp11258	homo_uasgfp13.lsm (cropped)	3.34	41.26	18.37
homo_uasgfp	homo_uasgfp11266	homo_uasgfp13.lsm (cropped)	9.37	49.59	32.37
homo_uasgfp	homo_uasgfp11271	homo_uasgfp13.lsm (cropped)	0.538	33.52	6.46
homo_uasgfp	homo_uasgfp11276	homo_uasgfp13.lsm (cropped)	0.432	39.54	8.73
homo_uasgfp	homo_uasgfp11282	homo_uasgfp13.lsm (cropped)	3.08	37.04	13.4
homo_uasgfp	homo_uasgfp11284	homo_uasgfp13.lsm (cropped)	2.89	39.81	31.54
homo_uasgfp	homo_uasgfp11287	homo_uasgfp13.lsm (cropped)	18.96	45.91	17.37
homo_uasgfp	homo_uasgfp11290	homo_uasgfp13.lsm (cropped)	6.94	41.55	8.12
homo_uasgfp	homo_uasgfp11291	homo_uasgfp13.lsm (cropped)	6.44	43.63	36.07
homo_uasgfp	homo_uasgfp11294	homo_uasgfp13.lsm (cropped)	4.48	37	17.15
homo_uasgfp	homo_uasgfp11296	homo_uasgfp13.lsm (cropped)	15.85	46.63	21.22
homo_uasgfp	homo_uasgfp11298	homo_uasgfp13.lsm (cropped)	0.547	33.13	37.57
homo_uasgfp	homo_uasgfp11301	homo_uasgfp13.lsm (cropped)	2.44	38.13	8.56
homo_uasgfp	homo_uasgfp11303	homo_uasgfp13.lsm (cropped)	1.92	35.66	8.06
homo_uasgfp	homo_uasgfp11334	homo_uasgfp13.lsm (cropped)	4.68	49.5	15.98
homo_uasgfp	homo_uasgfp11362	homo_uasgfp13.lsm (cropped)	1.95	37.75	14.24
homo_uasgfp	homo_uasgfp11369	homo_uasgfp13.lsm (cropped)	1.35	33.28	10.74
homo_uasgfp	homo_uasgfp11371	homo_uasgfp13.lsm (cropped)	0.906	36.08	24.11
homo_uasgfp	homo_uasgfp12822	homo_uasgfp16.lsm (cropped)	2.89	45.03	8.06
homo_uasgfp	homo_uasgfp12849	homo_uasgfp16.lsm (cropped)	0.301	39.64	4.83
homo_uasgfp	homo_uasgfp12853	homo_uasgfp16.lsm (cropped)	2.72	55.03	3.96
homo_uasgfp	homo_uasgfp12871	homo_uasgfp16.lsm (cropped)	0.751	42.38	10.54
homo_uasgfp	homo_uasgfp12884	homo_uasgfp16.lsm (cropped)	0.815	35.71	8.12
homo_uasgfp	homo_uasgfp12885	homo_uasgfp16.lsm (cropped)	3.09	40.3	3.53
homo_uasgfp	homo_uasgfp12913	homo_uasgfp16.lsm (cropped)	1.16	39.52	4.24
homo_uasgfp	homo_uasgfp12918	homo_uasgfp16.lsm (cropped)	4.03	42.91	7.67
homo_uasgfp	homo_uasgfp12919	homo_uasgfp16.lsm (cropped)	1.16	40.62	4.59
homo_uasgfp	homo_uasgfp12929	homo_uasgfp16.lsm (cropped)	0.94	35.64	3.64
homo_uasgfp	homo_uasgfp12943	homo_uasgfp16.lsm (cropped)	13.74	64.15	2.89
homo_uasgfp	homo_uasgfp12946	homo_uasgfp16.lsm (cropped)	5.48	43.32	3.02
homo_uasgfp	homo_uasgfp12960	homo_uasgfp16.lsm (cropped)	0.529	33.44	5.47
homo_uasgfp	homo_uasgfp12993	homo_uasgfp16.lsm (cropped)	2.6	42.97	7.49
homo_uasgfp	homo_uasgfp13041	homo_uasgfp16.lsm (cropped)	12.06	45.27	2.63
homo_uasgfp	homo_uasgfp13046	homo_uasgfp16.lsm (cropped)	5.28	39.45	2.52
homo_uasgfp	homo_uasgfp13050	homo_uasgfp16.lsm (cropped)	6.2	45.81	3.43
homo_uasgfp	homo_uasgfp13051	homo_uasgfp16.lsm (cropped)	1.22	36.41	7.21
homo_uasgfp	homo_uasgfp13072	homo_uasgfp16.lsm (cropped)	4.27	41.01	4.17
homo_uasgfp	homo_uasgfp14789	homo_uasgfp17.lsm (cropped)	1.9	33.88	89.06
homo_uasgfp	homo_uasgfp14795	homo_uasgfp17.lsm (cropped)	3	38.86	8.16
homo_uasgfp	homo_uasgfp14799	homo_uasgfp17.lsm (cropped)	2.36	36.1	7.07
homo_uasgfp	homo_uasgfp14811	homo_uasgfp17.lsm (cropped)	1.38	38.21	5.54
homo_uasgfp	homo_uasgfp14837	homo_uasgfp17.lsm (cropped)	8.41	46.93	16.92
homo_uasgfp	homo_uasgfp14846	homo_uasgfp17.lsm (cropped)	0.335	32.93	17.51
homo_uasgfp	homo_uasgfp14853	homo_uasgfp17.lsm (cropped)	8.58	40.4	4.18
homo_uasgfp	homo_uasgfp14855	homo_uasgfp17.lsm (cropped)	2.14	35.32	10.65
homo_uasgfp	homo_uasgfp14865	homo_uasgfp17.lsm (cropped)	1.66	36.16	24.78
homo_uasgfp	homo_uasgfp14871	homo_uasgfp17.lsm (cropped)	0.204	30.16	7.94
homo_uasgfp	homo_uasgfp14897	homo_uasgfp17.lsm (cropped)	0.338	32.4	27.23
homo_uasgfp	homo_uasgfp14929	homo_uasgfp17.lsm (cropped)	2.63	38.21	13.8
homo_uasgfp	homo_uasgfp14953	homo_uasgfp17.lsm (cropped)	4.97	37.06	4.74
homo_uasgfp	homo_uasgfp14964	homo_uasgfp17.lsm (cropped)	3.17	42.12	10.34
homo_uasgfp	homo_uasgfp14971	homo_uasgfp17.lsm (cropped)	0.359	31.4	10.35
homo_uasgfp	homo_uasgfp14976	homo_uasgfp17.lsm (cropped)	0.313	32.38	4.05
homo_uasgfp	homo_uasgfp14979	homo_uasgfp17.lsm (cropped)	0.383	32.4	37.48
homo_uasgfp	homo_uasgfp14997	homo_uasgfp17.lsm (cropped)	3.12	33.69	7.02
homo_uasgfp	homo_uasgfp14998	homo_uasgfp17.lsm (cropped)	5.99	34.07	11.63
homo_uasgfp	homo_uasgfp15026	homo_uasgfp17.lsm (cropped)	1.62	34.66	6.04
homo_uasgfp	homo_uasgfp15032	homo_uasgfp17.lsm (cropped)	1.5	33.45	5.92
homo_uasgfp	homo_uasgfp15040	homo_uasgfp17.lsm (cropped)	11.31	42.28	8.89
homo_uasgfp	homo_uasgfp15042	homo_uasgfp17.lsm (cropped)	1.58	48.34	14.79
homo_uasgfp	homo_uasgfp15046	homo_uasgfp17.lsm (cropped)	0.374	31.69	9.56
homo_uasgfp	homo_uasgfp15051	homo_uasgfp17.lsm (cropped)	1.56	34.14	11.57
homo_uasgfp	homo_uasgfp15054	homo_uasgfp17.lsm (cropped)	2.75	36.45	17.71
homo_uasgfp	homo_uasgfp15065	homo_uasgfp17.lsm (cropped)	1.55	34.52	20.38
homo_uasgfp	homo_uasgfp15066	homo_uasgfp17.lsm (cropped)	4.61	41.01	15.27
homo_uasgfp	homo_uasgfp15069	homo_uasgfp17.lsm (cropped)	0.423	32.87	10.93
homo_uasgfp	homo_uasgfp15070	homo_uasgfp17.lsm (cropped)	10.56	47.7	18.37
homo_uasgfp	homo_uasgfp15082	homo_uasgfp17.lsm (cropped)	11.03	40.22	22.68
homo_uasgfp	homo_uasgfp15088	homo_uasgfp17.lsm (cropped)	2.14	33.53	24.05
homo_uasgfp	homo_uasgfp15092	homo_uasgfp17.lsm (cropped)	4.88	39.61	7.09
homo_uasgfp	homo_uasgfp15102	homo_uasgfp17.lsm (cropped)	1.05	33.81	2.47
homo_uasgfp	homo_uasgfp15109	homo_uasgfp17.lsm (cropped)	0.718	31.52	5.67
homo_uasgfp	homo_uasgfp15117	homo_uasgfp17.lsm (cropped)	6.98	36.65	38.52
homo_uasgfp	homo_uasgfp15120	homo_uasgfp17.lsm (cropped)	1.85	32.39	11.44
homo_uasgfp	homo_uasgfp15121	homo_uasgfp17.lsm (cropped)	3.61	35.52	46.79
homo_uasgfp	homo_uasgfp15123	homo_uasgfp17.lsm (cropped)	2.86	36.33	5.93
homo_uasgfp	homo_uasgfp15125	homo_uasgfp17.lsm (cropped)	5.71	40.76	5.61
homo_uasgfp	homo_uasgfp15132	homo_uasgfp17.lsm (cropped)	0.861	31.16	9.54
homo_uasgfp	homo_uasgfp15138	homo_uasgfp17.lsm (cropped)	9.67	36.86	3.93
homo_uasgfp	homo_uasgfp15139	homo_uasgfp17.lsm (cropped)	1.54	31.89	13.97
homo_uasgfp	homo_uasgfp15140	homo_uasgfp17.lsm (cropped)	1.36	31.89	10.66

## Sheet: 7D
Source data for regression analysis
Pheno	BlobsID	Item.Name	Synapse Volume	MeanOXTint	MeanGFPint
wt_uascdc42	wt_uascdc421758	wt_uascdc4205.lsm (cropped)	1.49	222.649	184.082
wt_uascdc42	wt_uascdc421759	wt_uascdc4205.lsm (cropped)	0.654	189.929	139.143
wt_uascdc42	wt_uascdc421760	wt_uascdc4205.lsm (cropped)	1.21	195.347	190.989
wt_uascdc42	wt_uascdc421761	wt_uascdc4205.lsm (cropped)	1.05	219.279	153.453
wt_uascdc42	wt_uascdc421762	wt_uascdc4205.lsm (cropped)	2.99	204.929	148.439
wt_uascdc42	wt_uascdc421763	wt_uascdc4205.lsm (cropped)	0.703	194.559	146.341
wt_uascdc42	wt_uascdc421764	wt_uascdc4205.lsm (cropped)	1.25	191.833	142.718
wt_uascdc42	wt_uascdc421765	wt_uascdc4205.lsm (cropped)	0.757	198.516	157.148
wt_uascdc42	wt_uascdc421766	wt_uascdc4205.lsm (cropped)	2.96	202.015	155.483
wt_uascdc42	wt_uascdc421767	wt_uascdc4205.lsm (cropped)	0.66	187.889	147.849
wt_uascdc42	wt_uascdc421768	wt_uascdc4205.lsm (cropped)	0.308	188.58	173.36
wt_uascdc42	wt_uascdc421769	wt_uascdc4205.lsm (cropped)	0.887	213.818	158.389
wt_uascdc42	wt_uascdc421770	wt_uascdc4205.lsm (cropped)	3.93	216.517	179.5
wt_uascdc42	wt_uascdc421771	wt_uascdc4205.lsm (cropped)	0.914	188.103	144.796
wt_uascdc42	wt_uascdc421772	wt_uascdc4205.lsm (cropped)	0.487	183.476	132.767
wt_uascdc42	wt_uascdc421773	wt_uascdc4205.lsm (cropped)	1.02	196.845	142.595
wt_uascdc42	wt_uascdc421774	wt_uascdc4205.lsm (cropped)	1.36	192.595	141.156
wt_uascdc42	wt_uascdc421775	wt_uascdc4205.lsm (cropped)	0.611	184.354	131.125
wt_uascdc42	wt_uascdc421776	wt_uascdc4205.lsm (cropped)	1.55	208.307	167.523
wt_uascdc42	wt_uascdc421778	wt_uascdc4205.lsm (cropped)	0.719	210.263	166.024
wt_uascdc42	wt_uascdc421779	wt_uascdc4205.lsm (cropped)	2.68	216.274	164.628
wt_uascdc42	wt_uascdc421780	wt_uascdc4205.lsm (cropped)	0.633	205.22	148.854
wt_uascdc42	wt_uascdc421781	wt_uascdc4205.lsm (cropped)	1.45	214.35	145.527
wt_uascdc42	wt_uascdc421782	wt_uascdc4205.lsm (cropped)	3.31	210.39	150.23
wt_uascdc42	wt_uascdc421783	wt_uascdc4205.lsm (cropped)	0.254	200.562	150.03
wt_uascdc42	wt_uascdc421784	wt_uascdc4205.lsm (cropped)	0.703	192.203	131.231
wt_uascdc42	wt_uascdc421785	wt_uascdc4205.lsm (cropped)	0.2	191.719	137.554
wt_uascdc42	wt_uascdc421786	wt_uascdc4205.lsm (cropped)	0.676	205.822	142.661
wt_uascdc42	wt_uascdc421787	wt_uascdc4205.lsm (cropped)	0.757	184.733	149.119
wt_uascdc42	wt_uascdc421788	wt_uascdc4205.lsm (cropped)	0.595	188.402	151.55
wt_uascdc42	wt_uascdc421789	wt_uascdc4205.lsm (cropped)	0.406	185.456	144.358
wt_uascdc42	wt_uascdc421790	wt_uascdc4205.lsm (cropped)	0.216	180.756	149.345
wt_uascdc42	wt_uascdc421792	wt_uascdc4205.lsm (cropped)	0.714	200.421	148.72
wt_uascdc42	wt_uascdc421793	wt_uascdc4205.lsm (cropped)	0.811	194.354	161.123
wt_uascdc42	wt_uascdc421794	wt_uascdc4205.lsm (cropped)	0.433	186.118	149.957
wt_uascdc42	wt_uascdc421795	wt_uascdc4205.lsm (cropped)	1.48	194.819	151.497
wt_uascdc42	wt_uascdc421796	wt_uascdc4205.lsm (cropped)	0.2	186.448	141.858
wt_uascdc42	wt_uascdc421797	wt_uascdc4205.lsm (cropped)	1.5	203.817	152.092
wt_uascdc42	wt_uascdc421798	wt_uascdc4205.lsm (cropped)	0.47	195.328	150.898
wt_uascdc42	wt_uascdc421799	wt_uascdc4205.lsm (cropped)	0.757	187.399	147.2
wt_uascdc42	wt_uascdc421800	wt_uascdc4205.lsm (cropped)	0.281	199.585	187.139
wt_uascdc42	wt_uascdc421801	wt_uascdc4205.lsm (cropped)	1.22	193.557	157.712
wt_uascdc42	wt_uascdc421802	wt_uascdc4205.lsm (cropped)	0.297	183.111	140.704
wt_uascdc42	wt_uascdc421803	wt_uascdc4205.lsm (cropped)	0.314	195.985	173.13
wt_uascdc42	wt_uascdc421804	wt_uascdc4205.lsm (cropped)	0.795	190.329	159.642
wt_uascdc42	wt_uascdc421805	wt_uascdc4205.lsm (cropped)	4.03	210.677	153.748
wt_uascdc42	wt_uascdc421806	wt_uascdc4205.lsm (cropped)	0.73	197.992	135.954
wt_uascdc42	wt_uascdc421807	wt_uascdc4205.lsm (cropped)	2.59	205.374	151.257
wt_uascdc42	wt_uascdc421809	wt_uascdc4205.lsm (cropped)	9.83	216.521	147.714
wt_uascdc42	wt_uascdc421810	wt_uascdc4205.lsm (cropped)	0.508	197.719	138.526
wt_uascdc42	wt_uascdc421811	wt_uascdc4205.lsm (cropped)	1.14	188.944	174.921
wt_uascdc42	wt_uascdc421812	wt_uascdc4205.lsm (cropped)	0.865	198.757	157.097
wt_uascdc42	wt_uascdc421813	wt_uascdc4205.lsm (cropped)	1.75	188.853	140.581
wt_uascdc42	wt_uascdc421814	wt_uascdc4205.lsm (cropped)	0.389	200.015	161.751
wt_uascdc42	wt_uascdc421815	wt_uascdc4205.lsm (cropped)	0.53	199.125	161.849
wt_uascdc42	wt_uascdc421816	wt_uascdc4205.lsm (cropped)	0.373	195.893	148.116
wt_uascdc42	wt_uascdc421818	wt_uascdc4205.lsm (cropped)	0.541	199.85	166.538
wt_uascdc42	wt_uascdc421819	wt_uascdc4205.lsm (cropped)	0.752	191.22	147.094
wt_uascdc42	wt_uascdc421820	wt_uascdc4205.lsm (cropped)	3.65	212.788	154.308
wt_uascdc42	wt_uascdc421821	wt_uascdc4205.lsm (cropped)	0.373	195.85	129.302
wt_uascdc42	wt_uascdc421823	wt_uascdc4205.lsm (cropped)	1.8	220.373	152.867
wt_uascdc42	wt_uascdc421824	wt_uascdc4205.lsm (cropped)	6.68	221.94	167.716
wt_uascdc42	wt_uascdc421825	wt_uascdc4205.lsm (cropped)	1.27	186.112	137.516
wt_uascdc42	wt_uascdc421826	wt_uascdc4205.lsm (cropped)	0.849	200.475	127.552
wt_uascdc42	wt_uascdc421827	wt_uascdc4205.lsm (cropped)	1.88	205.275	153.462
wt_uascdc42	wt_uascdc421828	wt_uascdc4205.lsm (cropped)	0.887	190.7	144.887
wt_uascdc42	wt_uascdc421830	wt_uascdc4205.lsm (cropped)	0.497	181.487	124.195
wt_uascdc42	wt_uascdc421831	wt_uascdc4205.lsm (cropped)	0.86	200.19	134.834
wt_uascdc42	wt_uascdc421832	wt_uascdc4205.lsm (cropped)	0.319	187.147	133.459
wt_uascdc42	wt_uascdc421833	wt_uascdc4205.lsm (cropped)	0.378	200.551	141.454
wt_uascdc42	wt_uascdc421834	wt_uascdc4205.lsm (cropped)	0.589	195.25	159.701
wt_uascdc42	wt_uascdc421835	wt_uascdc4205.lsm (cropped)	0.557	208.769	150.4
wt_uascdc42	wt_uascdc421836	wt_uascdc4205.lsm (cropped)	1.02	191.111	178.103
wt_uascdc42	wt_uascdc421837	wt_uascdc4205.lsm (cropped)	0.368	187.765	136.531
wt_uascdc42	wt_uascdc421839	wt_uascdc4205.lsm (cropped)	1.11	195.546	164.172
wt_uascdc42	wt_uascdc421840	wt_uascdc4205.lsm (cropped)	0.27	187.16	179.559
wt_uascdc42	wt_uascdc421841	wt_uascdc4205.lsm (cropped)	0.508	189.291	124.76
wt_uascdc42	wt_uascdc421843	wt_uascdc4205.lsm (cropped)	0.243	196.451	133.284
wt_uascdc42	wt_uascdc421844	wt_uascdc4205.lsm (cropped)	0.984	195.097	125.038
wt_uascdc42	wt_uascdc421845	wt_uascdc4205.lsm (cropped)	2.37	207.987	143.875
wt_uascdc42	wt_uascdc421846	wt_uascdc4205.lsm (cropped)	0.357	193.625	136.387
wt_uascdc42	wt_uascdc421848	wt_uascdc4205.lsm (cropped)	0.919	195.195	181.249
wt_uascdc42	wt_uascdc421850	wt_uascdc4205.lsm (cropped)	4.48	215.253	152.094
wt_uascdc42	wt_uascdc421851	wt_uascdc4205.lsm (cropped)	0.508	192.916	130.942
wt_uascdc42	wt_uascdc421852	wt_uascdc4205.lsm (cropped)	1.92	201.471	144.736
wt_uascdc42	wt_uascdc421853	wt_uascdc4205.lsm (cropped)	2.39	203.465	130.641
wt_uascdc42	wt_uascdc421854	wt_uascdc4205.lsm (cropped)	0.406	187.169	127.23
wt_uascdc42	wt_uascdc421855	wt_uascdc4205.lsm (cropped)	0.211	194.925	182.722
wt_uascdc42	wt_uascdc421856	wt_uascdc4205.lsm (cropped)	1.45	197.168	150.242
wt_uascdc42	wt_uascdc421857	wt_uascdc4205.lsm (cropped)	0.222	191.605	157.597
wt_uascdc42	wt_uascdc421858	wt_uascdc4205.lsm (cropped)	0.265	189.637	145.709
wt_uascdc42	wt_uascdc421859	wt_uascdc4205.lsm (cropped)	3.51	201.338	145.094
wt_uascdc42	wt_uascdc421860	wt_uascdc4205.lsm (cropped)	0.4	186.402	132.922
wt_uascdc42	wt_uascdc421862	wt_uascdc4205.lsm (cropped)	0.368	189.633	153.778
wt_uascdc42	wt_uascdc421863	wt_uascdc4205.lsm (cropped)	1.09	190.894	123.245
wt_uascdc42	wt_uascdc421864	wt_uascdc4205.lsm (cropped)	2	192.639	126.881
wt_uascdc42	wt_uascdc421865	wt_uascdc4205.lsm (cropped)	1.64	197.986	125.257
wt_uascdc42	wt_uascdc421866	wt_uascdc4205.lsm (cropped)	1.45	200.057	129.738
wt_uascdc42	wt_uascdc421867	wt_uascdc4205.lsm (cropped)	0.276	192.083	149.139
wt_uascdc42	wt_uascdc421868	wt_uascdc4205.lsm (cropped)	2.02	194.896	148.732
wt_uascdc42	wt_uascdc421869	wt_uascdc4205.lsm (cropped)	0.843	203.82	137.34
wt_uascdc42	wt_uascdc421870	wt_uascdc4205.lsm (cropped)	0.752	188.405	155.45
wt_uascdc42	wt_uascdc421871	wt_uascdc4205.lsm (cropped)	0.481	187.973	130.232
wt_uascdc42	wt_uascdc421872	wt_uascdc4205.lsm (cropped)	0.968	199.432	121.482
wt_uascdc42	wt_uascdc421873	wt_uascdc4205.lsm (cropped)	2.78	209.391	141.129
wt_uascdc42	wt_uascdc421874	wt_uascdc4205.lsm (cropped)	3.03	207.168	141.47
wt_uascdc42	wt_uascdc421875	wt_uascdc4205.lsm (cropped)	9.04	215.845	147.903
wt_uascdc42	wt_uascdc421876	wt_uascdc4205.lsm (cropped)	1.32	203.806	134.192
wt_uascdc42	wt_uascdc421877	wt_uascdc4205.lsm (cropped)	0.433	194.692	154.43
wt_uascdc42	wt_uascdc421878	wt_uascdc4205.lsm (cropped)	0.46	190.001	129.392
wt_uascdc42	wt_uascdc421880	wt_uascdc4205.lsm (cropped)	11.74	224.524	171.392
wt_uascdc42	wt_uascdc421881	wt_uascdc4205.lsm (cropped)	1.35	196.279	141.135
wt_uascdc42	wt_uascdc421882	wt_uascdc4205.lsm (cropped)	1.34	197.509	136.37
wt_uascdc42	wt_uascdc421883	wt_uascdc4205.lsm (cropped)	1.11	185.156	116.98
wt_uascdc42	wt_uascdc421884	wt_uascdc4205.lsm (cropped)	0.476	183.604	122.705
wt_uascdc42	wt_uascdc421885	wt_uascdc4205.lsm (cropped)	2.11	190.506	138.646
wt_uascdc42	wt_uascdc421886	wt_uascdc4205.lsm (cropped)	0.438	179.862	118.179
wt_uascdc42	wt_uascdc421887	wt_uascdc4205.lsm (cropped)	1.04	190.033	136.232
wt_uascdc42	wt_uascdc421888	wt_uascdc4205.lsm (cropped)	0.33	183.275	126.757
wt_uascdc42	wt_uascdc421889	wt_uascdc4205.lsm (cropped)	0.297	180.137	135.057
wt_uascdc42	wt_uascdc421890	wt_uascdc4205.lsm (cropped)	1.07	191.352	139.616
wt_uascdc42	wt_uascdc421891	wt_uascdc4205.lsm (cropped)	0.67	187.495	151.18
wt_uascdc42	wt_uascdc421892	wt_uascdc4205.lsm (cropped)	1.78	201.666	145.688
wt_uascdc42	wt_uascdc421893	wt_uascdc4205.lsm (cropped)	0.287	189.149	143.658
wt_uascdc42	wt_uascdc421894	wt_uascdc4205.lsm (cropped)	3	219.644	150.134
wt_uascdc42	wt_uascdc421895	wt_uascdc4205.lsm (cropped)	2.35	194.976	119.538
wt_uascdc42	wt_uascdc421897	wt_uascdc4205.lsm (cropped)	2.32	199.441	132.047
wt_uascdc42	wt_uascdc421898	wt_uascdc4205.lsm (cropped)	1.74	201.585	135.584
wt_uascdc42	wt_uascdc421900	wt_uascdc4205.lsm (cropped)	1.43	213.761	133.217
wt_uascdc42	wt_uascdc421901	wt_uascdc4205.lsm (cropped)	0.649	209.277	186.906
wt_uascdc42	wt_uascdc421902	wt_uascdc4205.lsm (cropped)	0.216	196.37	176.73
wt_uascdc42	wt_uascdc421903	wt_uascdc4205.lsm (cropped)	2.02	204.112	137.606
wt_uascdc42	wt_uascdc421904	wt_uascdc4205.lsm (cropped)	0.422	186.609	136.024
wt_uascdc42	wt_uascdc421905	wt_uascdc4205.lsm (cropped)	0.962	194.603	125.08
wt_uascdc42	wt_uascdc421906	wt_uascdc4205.lsm (cropped)	2.76	219.853	145.873
wt_uascdc42	wt_uascdc421908	wt_uascdc4205.lsm (cropped)	0.497	187.653	150.191
wt_uascdc42	wt_uascdc421909	wt_uascdc4205.lsm (cropped)	1.2	185.798	154.009
wt_uascdc42	wt_uascdc421910	wt_uascdc4205.lsm (cropped)	3.16	209.372	162.909
wt_uascdc42	wt_uascdc421911	wt_uascdc4205.lsm (cropped)	1.55	198.697	153.722
wt_uascdc42	wt_uascdc421912	wt_uascdc4205.lsm (cropped)	0.806	205.068	152.162
wt_uascdc42	wt_uascdc421913	wt_uascdc4205.lsm (cropped)	1.43	196.785	143.153
wt_uascdc42	wt_uascdc421914	wt_uascdc4205.lsm (cropped)	0.346	182.243	127.231
wt_uascdc42	wt_uascdc421915	wt_uascdc4205.lsm (cropped)	3.73	203.35	138.993
wt_uascdc42	wt_uascdc421916	wt_uascdc4205.lsm (cropped)	3.17	209.663	146.502
wt_uascdc42	wt_uascdc421917	wt_uascdc4205.lsm (cropped)	8.38	215.171	164.136
wt_uascdc42	wt_uascdc421918	wt_uascdc4205.lsm (cropped)	5.11	220.39	163.281
wt_uascdc42	wt_uascdc421919	wt_uascdc4205.lsm (cropped)	0.703	198.655	171.893
wt_uascdc42	wt_uascdc421920	wt_uascdc4205.lsm (cropped)	0.795	186.358	140.015
wt_uascdc42	wt_uascdc421921	wt_uascdc4205.lsm (cropped)	0.314	185.745	145.25
wt_uascdc42	wt_uascdc421922	wt_uascdc4205.lsm (cropped)	4.37	219.407	157.071
wt_uascdc42	wt_uascdc421923	wt_uascdc4205.lsm (cropped)	0.773	191.13	145.775
wt_uascdc42	wt_uascdc421924	wt_uascdc4205.lsm (cropped)	5.79	204.681	162.187
wt_uascdc42	wt_uascdc421925	wt_uascdc4205.lsm (cropped)	2.08	203.306	135.768
wt_uascdc42	wt_uascdc421926	wt_uascdc4205.lsm (cropped)	1.96	207.963	136.66
wt_uascdc42	wt_uascdc421928	wt_uascdc4205.lsm (cropped)	1.6	197.281	144.998
wt_uascdc42	wt_uascdc421929	wt_uascdc4205.lsm (cropped)	0.643	187.558	149.721
wt_uascdc42	wt_uascdc421931	wt_uascdc4205.lsm (cropped)	2.41	201.347	141.165
wt_uascdc42	wt_uascdc421932	wt_uascdc4205.lsm (cropped)	14.75	221.91	161.455
wt_uascdc42	wt_uascdc421933	wt_uascdc4205.lsm (cropped)	1.15	196.256	143.42
wt_uascdc42	wt_uascdc421934	wt_uascdc4205.lsm (cropped)	0.249	197.499	142.632
wt_uascdc42	wt_uascdc421935	wt_uascdc4205.lsm (cropped)	13.25	213.189	148.996
wt_uascdc42	wt_uascdc421936	wt_uascdc4205.lsm (cropped)	4.71	210.753	150.265
wt_uascdc42	wt_uascdc421937	wt_uascdc4205.lsm (cropped)	1.41	206.738	146.561
wt_uascdc42	wt_uascdc421938	wt_uascdc4205.lsm (cropped)	14.89	212.882	144.386
wt_uascdc42	wt_uascdc421940	wt_uascdc4205.lsm (cropped)	1.96	203.895	161.363
wt_uascdc42	wt_uascdc421941	wt_uascdc4205.lsm (cropped)	0.362	186.099	130.412
wt_uascdc42	wt_uascdc421942	wt_uascdc4205.lsm (cropped)	1.08	200.257	139.485
wt_uascdc42	wt_uascdc421943	wt_uascdc4205.lsm (cropped)	2.92	210.338	143.482
wt_uascdc42	wt_uascdc421944	wt_uascdc4205.lsm (cropped)	0.519	189.549	138.072
wt_uascdc42	wt_uascdc421945	wt_uascdc4205.lsm (cropped)	1.74	200.419	160.535
wt_uascdc42	wt_uascdc421946	wt_uascdc4205.lsm (cropped)	4.91	201.58	141.799
wt_uascdc42	wt_uascdc421947	wt_uascdc4205.lsm (cropped)	2.31	200.308	134.263
wt_uascdc42	wt_uascdc421948	wt_uascdc4205.lsm (cropped)	2.55	193.376	160.728
wt_uascdc42	wt_uascdc421949	wt_uascdc4205.lsm (cropped)	2.14	206.165	151.146
wt_uascdc42	wt_uascdc421950	wt_uascdc4205.lsm (cropped)	3.87	213.415	151.921
wt_uascdc42	wt_uascdc421951	wt_uascdc4205.lsm (cropped)	12.14	231.26	175.935
wt_uascdc42	wt_uascdc421952	wt_uascdc4205.lsm (cropped)	7.03	219.909	168.825
wt_uascdc42	wt_uascdc421953	wt_uascdc4205.lsm (cropped)	1.2	194.748	148.993
wt_uascdc42	wt_uascdc421954	wt_uascdc4205.lsm (cropped)	3.03	200.929	156.354
wt_uascdc42	wt_uascdc421955	wt_uascdc4205.lsm (cropped)	1.56	192.736	152.053
wt_uascdc42	wt_uascdc421956	wt_uascdc4205.lsm (cropped)	1.87	208.204	150.009
wt_uascdc42	wt_uascdc421957	wt_uascdc4205.lsm (cropped)	2.06	208.888	160.916
wt_uascdc42	wt_uascdc421958	wt_uascdc4205.lsm (cropped)	0.551	210.29	180.92
wt_uascdc42	wt_uascdc421960	wt_uascdc4205.lsm (cropped)	1.96	216.939	140.038
wt_uascdc42	wt_uascdc421961	wt_uascdc4205.lsm (cropped)	6.02	214.078	153.806
wt_uascdc42	wt_uascdc421962	wt_uascdc4205.lsm (cropped)	1.82	202.375	142.106
wt_uascdc42	wt_uascdc421963	wt_uascdc4205.lsm (cropped)	0.67	188.917	130.45
wt_uascdc42	wt_uascdc421964	wt_uascdc4205.lsm (cropped)	2.17	200.829	159.802
wt_uascdc42	wt_uascdc421965	wt_uascdc4205.lsm (cropped)	3.07	213.635	156.946
wt_uascdc42	wt_uascdc421966	wt_uascdc4205.lsm (cropped)	5.97	204.948	149.759
wt_uascdc42	wt_uascdc421967	wt_uascdc4205.lsm (cropped)	1.37	194.942	143.607
wt_uascdc42	wt_uascdc421968	wt_uascdc4205.lsm (cropped)	6.9	223.981	171.378
wt_uascdc42	wt_uascdc421969	wt_uascdc4205.lsm (cropped)	1.48	195.611	136.817
wt_uascdc42	wt_uascdc421970	wt_uascdc4205.lsm (cropped)	1.94	203.242	137.857
wt_uascdc42	wt_uascdc421971	wt_uascdc4205.lsm (cropped)	5.23	220.752	169.758
wt_uascdc42	wt_uascdc421972	wt_uascdc4205.lsm (cropped)	0.276	180.181	138.387
wt_uascdc42	wt_uascdc421974	wt_uascdc4205.lsm (cropped)	1.31	191.111	150.694
wt_uascdc42	wt_uascdc421975	wt_uascdc4205.lsm (cropped)	2.42	206.343	143.42
wt_uascdc42	wt_uascdc421976	wt_uascdc4205.lsm (cropped)	0.649	192.383	132.837
wt_uascdc42	wt_uascdc421977	wt_uascdc4205.lsm (cropped)	2.61	190.835	122.404
wt_uascdc42	wt_uascdc421978	wt_uascdc4205.lsm (cropped)	1.38	188.766	130.692
wt_uascdc42	wt_uascdc421979	wt_uascdc4205.lsm (cropped)	1.56	186.143	127.722
wt_uascdc42	wt_uascdc421980	wt_uascdc4205.lsm (cropped)	0.925	201.185	136.799
wt_uascdc42	wt_uascdc421981	wt_uascdc4205.lsm (cropped)	2.57	206.179	136.002
wt_uascdc42	wt_uascdc421982	wt_uascdc4205.lsm (cropped)	2.56	198.161	136.612
wt_uascdc42	wt_uascdc421983	wt_uascdc4205.lsm (cropped)	2.11	202.938	147.634
wt_uascdc42	wt_uascdc421984	wt_uascdc4205.lsm (cropped)	4.5	200.886	147.034
wt_uascdc42	wt_uascdc421985	wt_uascdc4205.lsm (cropped)	2.27	203.525	131.409
wt_uascdc42	wt_uascdc421986	wt_uascdc4205.lsm (cropped)	3.54	205.346	143.35
wt_uascdc42	wt_uascdc421988	wt_uascdc4205.lsm (cropped)	1.88	199.211	143.281
wt_uascdc42	wt_uascdc421989	wt_uascdc4205.lsm (cropped)	0.303	185.692	124.99
wt_uascdc42	wt_uascdc421990	wt_uascdc4205.lsm (cropped)	2.77	213.684	157.996
wt_uascdc42	wt_uascdc421991	wt_uascdc4205.lsm (cropped)	2.78	199.926	149.797
wt_uascdc42	wt_uascdc421992	wt_uascdc4205.lsm (cropped)	4.73	205.525	140.403
wt_uascdc42	wt_uascdc421993	wt_uascdc4205.lsm (cropped)	1.03	198.074	129.962
wt_uascdc42	wt_uascdc421996	wt_uascdc4205.lsm (cropped)	1.54	199.858	160.824
wt_uascdc42	wt_uascdc421997	wt_uascdc4205.lsm (cropped)	0.411	199.418	166.046
wt_uascdc42	wt_uascdc422000	wt_uascdc4205.lsm (cropped)	1.16	184.515	131.79
wt_uascdc42	wt_uascdc422001	wt_uascdc4205.lsm (cropped)	0.232	184.95	120.816
wt_uascdc42	wt_uascdc422003	wt_uascdc4205.lsm (cropped)	0.773	187.516	154.431
wt_uascdc42	wt_uascdc422004	wt_uascdc4205.lsm (cropped)	0.26	188.781	126.419
wt_uascdc42	wt_uascdc422005	wt_uascdc4205.lsm (cropped)	1.64	189.217	141.942
wt_uascdc42	wt_uascdc422006	wt_uascdc4205.lsm (cropped)	3.35	204.286	145.907
wt_uascdc42	wt_uascdc422008	wt_uascdc4205.lsm (cropped)	2.44	195.26	122.673
wt_uascdc42	wt_uascdc422010	wt_uascdc4205.lsm (cropped)	0.681	190.96	136.762
wt_uascdc42	wt_uascdc422012	wt_uascdc4205.lsm (cropped)	3.49	202.798	141.264
wt_uascdc42	wt_uascdc422016	wt_uascdc4205.lsm (cropped)	1.66	197.866	141.065
wt_uascdc42	wt_uascdc422017	wt_uascdc4205.lsm (cropped)	4.62	191.885	141.751
wt_uascdc42	wt_uascdc422019	wt_uascdc4205.lsm (cropped)	2.11	195.128	140.517
wt_uascdc42	wt_uascdc422021	wt_uascdc4205.lsm (cropped)	2.21	195.269	147.706
wt_uascdc42	wt_uascdc422022	wt_uascdc4205.lsm (cropped)	2.62	197.917	134.1
wt_uascdc42	wt_uascdc422024	wt_uascdc4205.lsm (cropped)	1.8	196.766	134.7
wt_uascdc42	wt_uascdc422025	wt_uascdc4205.lsm (cropped)	3.54	213.611	147.524
wt_uascdc42	wt_uascdc422027	wt_uascdc4205.lsm (cropped)	11.44	216.89	153.038
wt_uascdc42	wt_uascdc422028	wt_uascdc4205.lsm (cropped)	2.58	188.166	134.8
wt_uascdc42	wt_uascdc422029	wt_uascdc4205.lsm (cropped)	0.67	184.984	156.616
wt_uascdc42	wt_uascdc422030	wt_uascdc4205.lsm (cropped)	2.45	195.307	125.638
wt_uascdc42	wt_uascdc422033	wt_uascdc4205.lsm (cropped)	6.57	213.672	146.831
wt_uascdc42	wt_uascdc422034	wt_uascdc4205.lsm (cropped)	14.77	207.665	149.924
wt_uascdc42	wt_uascdc422035	wt_uascdc4205.lsm (cropped)	5.11	197.574	140.27
wt_uascdc42	wt_uascdc422036	wt_uascdc4205.lsm (cropped)	2.15	198.458	143.731
wt_uascdc42	wt_uascdc422037	wt_uascdc4205.lsm (cropped)	2.56	193.056	139.646
wt_uascdc42	wt_uascdc422038	wt_uascdc4205.lsm (cropped)	19.97	211.152	146.752
wt_uascdc42	wt_uascdc422039	wt_uascdc4205.lsm (cropped)	1.34	204.747	154.462
wt_uascdc42	wt_uascdc424311	wt_uascdc4208.lsm (cropped)	0.265	209.737	173.001
wt_uascdc42	wt_uascdc424312	wt_uascdc4208.lsm (cropped)	0.357	207.23	193.912
wt_uascdc42	wt_uascdc424313	wt_uascdc4208.lsm (cropped)	0.297	209.734	193.516
wt_uascdc42	wt_uascdc424314	wt_uascdc4208.lsm (cropped)	0.222	212.283	193.452
wt_uascdc42	wt_uascdc424315	wt_uascdc4208.lsm (cropped)	0.887	222.477	176.944
wt_uascdc42	wt_uascdc424316	wt_uascdc4208.lsm (cropped)	1.63	225.006	194.905
wt_uascdc42	wt_uascdc424317	wt_uascdc4208.lsm (cropped)	0.357	210.909	189.254
wt_uascdc42	wt_uascdc424318	wt_uascdc4208.lsm (cropped)	0.524	200.873	174.408
wt_uascdc42	wt_uascdc424319	wt_uascdc4208.lsm (cropped)	0.216	219.231	190.438
wt_uascdc42	wt_uascdc424322	wt_uascdc4208.lsm (cropped)	0.816	221.142	187.028
wt_uascdc42	wt_uascdc424323	wt_uascdc4208.lsm (cropped)	0.357	215.027	172.303
wt_uascdc42	wt_uascdc424324	wt_uascdc4208.lsm (cropped)	2.4	226.332	193.385
wt_uascdc42	wt_uascdc424325	wt_uascdc4208.lsm (cropped)	0.281	201.229	177.946
wt_uascdc42	wt_uascdc424326	wt_uascdc4208.lsm (cropped)	2.31	220.987	180.612
wt_uascdc42	wt_uascdc424327	wt_uascdc4208.lsm (cropped)	2.99	231.025	213.29
wt_uascdc42	wt_uascdc424328	wt_uascdc4208.lsm (cropped)	4.82	225.68	200.559
wt_uascdc42	wt_uascdc424329	wt_uascdc4208.lsm (cropped)	0.843	208.408	175.332
wt_uascdc42	wt_uascdc424330	wt_uascdc4208.lsm (cropped)	0.492	212.221	186.722
wt_uascdc42	wt_uascdc424331	wt_uascdc4208.lsm (cropped)	0.735	207.667	190.063
wt_uascdc42	wt_uascdc424332	wt_uascdc4208.lsm (cropped)	0.8	200.584	166.627
wt_uascdc42	wt_uascdc424333	wt_uascdc4208.lsm (cropped)	1	203.6	168.895
wt_uascdc42	wt_uascdc424334	wt_uascdc4208.lsm (cropped)	0.654	199.206	167.647
wt_uascdc42	wt_uascdc424335	wt_uascdc4208.lsm (cropped)	0.676	204.161	163.435
wt_uascdc42	wt_uascdc424336	wt_uascdc4208.lsm (cropped)	0.492	211.505	199.757
wt_uascdc42	wt_uascdc424338	wt_uascdc4208.lsm (cropped)	0.395	214.979	175.524
wt_uascdc42	wt_uascdc424339	wt_uascdc4208.lsm (cropped)	0.422	211.631	174.511
wt_uascdc42	wt_uascdc424340	wt_uascdc4208.lsm (cropped)	1.53	216.129	183.279
wt_uascdc42	wt_uascdc424341	wt_uascdc4208.lsm (cropped)	0.973	213.747	183.925
wt_uascdc42	wt_uascdc424342	wt_uascdc4208.lsm (cropped)	0.422	210.774	196.266
wt_uascdc42	wt_uascdc424344	wt_uascdc4208.lsm (cropped)	1.72	218.986	189.118
wt_uascdc42	wt_uascdc424345	wt_uascdc4208.lsm (cropped)	1.02	217.844	222.132
wt_uascdc42	wt_uascdc424346	wt_uascdc4208.lsm (cropped)	0.93	217.772	183.301
wt_uascdc42	wt_uascdc424347	wt_uascdc4208.lsm (cropped)	2.98	215.289	184.944
wt_uascdc42	wt_uascdc424348	wt_uascdc4208.lsm (cropped)	0.2	196.747	182.654
wt_uascdc42	wt_uascdc424349	wt_uascdc4208.lsm (cropped)	0.616	219.307	192.125
wt_uascdc42	wt_uascdc424350	wt_uascdc4208.lsm (cropped)	0.265	206.238	184.289
wt_uascdc42	wt_uascdc424351	wt_uascdc4208.lsm (cropped)	0.881	204.698	175.418
wt_uascdc42	wt_uascdc424352	wt_uascdc4208.lsm (cropped)	2.47	217.311	184.633
wt_uascdc42	wt_uascdc424353	wt_uascdc4208.lsm (cropped)	0.757	213.869	200.938
wt_uascdc42	wt_uascdc424355	wt_uascdc4208.lsm (cropped)	2.91	226.32	187.145
wt_uascdc42	wt_uascdc424356	wt_uascdc4208.lsm (cropped)	0.714	220.761	186.131
wt_uascdc42	wt_uascdc424357	wt_uascdc4208.lsm (cropped)	0.341	211.597	193.663
wt_uascdc42	wt_uascdc424358	wt_uascdc4208.lsm (cropped)	4.86	223.713	189.359
wt_uascdc42	wt_uascdc424359	wt_uascdc4208.lsm (cropped)	5.35	232.9	204.199
wt_uascdc42	wt_uascdc424360	wt_uascdc4208.lsm (cropped)	1.45	219.257	209.372
wt_uascdc42	wt_uascdc424361	wt_uascdc4208.lsm (cropped)	2.14	224.294	190.077
wt_uascdc42	wt_uascdc424362	wt_uascdc4208.lsm (cropped)	1.08	215.092	190.476
wt_uascdc42	wt_uascdc424363	wt_uascdc4208.lsm (cropped)	0.606	222.246	190.065
wt_uascdc42	wt_uascdc424364	wt_uascdc4208.lsm (cropped)	1.32	213.024	185.871
wt_uascdc42	wt_uascdc424365	wt_uascdc4208.lsm (cropped)	1.17	225.822	180.461
wt_uascdc42	wt_uascdc424366	wt_uascdc4208.lsm (cropped)	0.503	211.428	177.33
wt_uascdc42	wt_uascdc424367	wt_uascdc4208.lsm (cropped)	0.2	195.82	179.216
wt_uascdc42	wt_uascdc424368	wt_uascdc4208.lsm (cropped)	0.454	199.07	181.539
wt_uascdc42	wt_uascdc424369	wt_uascdc4208.lsm (cropped)	0.492	199.316	170.422
wt_uascdc42	wt_uascdc424371	wt_uascdc4208.lsm (cropped)	0.314	202.157	186.924
wt_uascdc42	wt_uascdc424372	wt_uascdc4208.lsm (cropped)	0.838	223.792	190.855
wt_uascdc42	wt_uascdc424373	wt_uascdc4208.lsm (cropped)	0.806	211.294	178.815
wt_uascdc42	wt_uascdc424376	wt_uascdc4208.lsm (cropped)	2.17	216.388	191.668
wt_uascdc42	wt_uascdc424377	wt_uascdc4208.lsm (cropped)	0.443	201.435	181.293
wt_uascdc42	wt_uascdc424378	wt_uascdc4208.lsm (cropped)	0.784	208.109	178.93
wt_uascdc42	wt_uascdc424379	wt_uascdc4208.lsm (cropped)	0.551	214.7	170.499
wt_uascdc42	wt_uascdc424380	wt_uascdc4208.lsm (cropped)	1.57	209.206	172.212
wt_uascdc42	wt_uascdc424381	wt_uascdc4208.lsm (cropped)	0.341	202.32	177.855
wt_uascdc42	wt_uascdc424382	wt_uascdc4208.lsm (cropped)	0.297	211.307	186.795
wt_uascdc42	wt_uascdc424387	wt_uascdc4208.lsm (cropped)	0.768	222.686	182.329
wt_uascdc42	wt_uascdc424388	wt_uascdc4208.lsm (cropped)	0.481	206.059	187.428
wt_uascdc42	wt_uascdc424390	wt_uascdc4208.lsm (cropped)	0.952	214.312	164.707
wt_uascdc42	wt_uascdc424392	wt_uascdc4208.lsm (cropped)	0.335	204.267	168.227
wt_uascdc42	wt_uascdc424393	wt_uascdc4208.lsm (cropped)	5.04	222.677	203.368
wt_uascdc42	wt_uascdc424394	wt_uascdc4208.lsm (cropped)	0.919	209.538	174.677
wt_uascdc42	wt_uascdc424395	wt_uascdc4208.lsm (cropped)	0.908	210.069	164.219
wt_uascdc42	wt_uascdc424397	wt_uascdc4208.lsm (cropped)	0.47	209.746	170.116
wt_uascdc42	wt_uascdc424398	wt_uascdc4208.lsm (cropped)	0.351	202.921	166.02
wt_uascdc42	wt_uascdc424399	wt_uascdc4208.lsm (cropped)	0.589	210.161	176.775
wt_uascdc42	wt_uascdc424400	wt_uascdc4208.lsm (cropped)	1.16	220.371	191.338
wt_uascdc42	wt_uascdc424401	wt_uascdc4208.lsm (cropped)	0.395	194.835	186.81
wt_uascdc42	wt_uascdc424402	wt_uascdc4208.lsm (cropped)	0.476	203.616	173.028
wt_uascdc42	wt_uascdc424404	wt_uascdc4208.lsm (cropped)	2.09	207.158	184.63
wt_uascdc42	wt_uascdc424405	wt_uascdc4208.lsm (cropped)	0.503	222.685	180.341
wt_uascdc42	wt_uascdc424406	wt_uascdc4208.lsm (cropped)	0.433	212.735	169.646
wt_uascdc42	wt_uascdc424407	wt_uascdc4208.lsm (cropped)	0.968	212.302	182.441
wt_uascdc42	wt_uascdc424408	wt_uascdc4208.lsm (cropped)	2.23	215.714	189.355
wt_uascdc42	wt_uascdc424409	wt_uascdc4208.lsm (cropped)	8.05	224.243	194.461
wt_uascdc42	wt_uascdc424410	wt_uascdc4208.lsm (cropped)	2.18	217.477	199.881
wt_uascdc42	wt_uascdc424411	wt_uascdc4208.lsm (cropped)	0.762	213.919	171.705
wt_uascdc42	wt_uascdc424412	wt_uascdc4208.lsm (cropped)	5.63	219.255	191.162
wt_uascdc42	wt_uascdc424415	wt_uascdc4208.lsm (cropped)	7.13	222.5	189.362
wt_uascdc42	wt_uascdc424416	wt_uascdc4208.lsm (cropped)	1.16	206.942	183.871
wt_uascdc42	wt_uascdc424417	wt_uascdc4208.lsm (cropped)	2.82	213.122	194.128
wt_uascdc42	wt_uascdc424418	wt_uascdc4208.lsm (cropped)	0.941	207.191	175.172
wt_uascdc42	wt_uascdc424419	wt_uascdc4208.lsm (cropped)	4.88	225.476	198.968
wt_uascdc42	wt_uascdc424420	wt_uascdc4208.lsm (cropped)	1.47	211.24	176.414
wt_uascdc42	wt_uascdc424421	wt_uascdc4208.lsm (cropped)	0.843	218.001	205.891
wt_uascdc42	wt_uascdc424422	wt_uascdc4208.lsm (cropped)	4.02	226.354	198.825
wt_uascdc42	wt_uascdc424423	wt_uascdc4208.lsm (cropped)	3.33	222.657	195.441
wt_uascdc42	wt_uascdc424424	wt_uascdc4208.lsm (cropped)	0.984	208.235	179.237
wt_uascdc42	wt_uascdc424425	wt_uascdc4208.lsm (cropped)	4	221.141	186.603
wt_uascdc42	wt_uascdc424426	wt_uascdc4208.lsm (cropped)	1.76	211.615	184.881
wt_uascdc42	wt_uascdc424429	wt_uascdc4208.lsm (cropped)	0.46	209.4	179.152
wt_uascdc42	wt_uascdc424430	wt_uascdc4208.lsm (cropped)	1.3	205.024	182.93
wt_uascdc42	wt_uascdc424431	wt_uascdc4208.lsm (cropped)	0.6	199.273	172.273
wt_uascdc42	wt_uascdc424432	wt_uascdc4208.lsm (cropped)	0.514	198.525	178.524
wt_uascdc42	wt_uascdc424434	wt_uascdc4208.lsm (cropped)	0.968	203.038	176.056
wt_uascdc42	wt_uascdc424435	wt_uascdc4208.lsm (cropped)	3.35	215.667	178.86
wt_uascdc42	wt_uascdc424437	wt_uascdc4208.lsm (cropped)	1.15	200.085	179.688
wt_uascdc42	wt_uascdc424438	wt_uascdc4208.lsm (cropped)	0.622	201.867	183.958
wt_uascdc42	wt_uascdc424439	wt_uascdc4208.lsm (cropped)	1.41	222.421	198.655
wt_uascdc42	wt_uascdc424440	wt_uascdc4208.lsm (cropped)	0.616	203.414	161.78
wt_uascdc42	wt_uascdc424442	wt_uascdc4208.lsm (cropped)	0.438	202.843	171.528
wt_uascdc42	wt_uascdc424443	wt_uascdc4208.lsm (cropped)	2.08	211.204	164.967
wt_uascdc42	wt_uascdc424444	wt_uascdc4208.lsm (cropped)	0.227	203.807	171.344
wt_uascdc42	wt_uascdc424446	wt_uascdc4208.lsm (cropped)	0.935	199.46	166.585
wt_uascdc42	wt_uascdc424447	wt_uascdc4208.lsm (cropped)	1.4	203.338	181.573
wt_uascdc42	wt_uascdc424448	wt_uascdc4208.lsm (cropped)	4.24	216.566	197.806
wt_uascdc42	wt_uascdc424450	wt_uascdc4208.lsm (cropped)	0.573	202.295	166.13
wt_uascdc42	wt_uascdc424451	wt_uascdc4208.lsm (cropped)	0.254	195.934	180.47
wt_uascdc42	wt_uascdc424453	wt_uascdc4208.lsm (cropped)	3.18	213.566	190.871
wt_uascdc42	wt_uascdc424454	wt_uascdc4208.lsm (cropped)	1.11	212.911	186.209
wt_uascdc42	wt_uascdc424455	wt_uascdc4208.lsm (cropped)	0.265	199.711	195.634
wt_uascdc42	wt_uascdc424456	wt_uascdc4208.lsm (cropped)	3.05	216.376	195.186
wt_uascdc42	wt_uascdc424457	wt_uascdc4208.lsm (cropped)	0.503	202.65	170.405
wt_uascdc42	wt_uascdc424458	wt_uascdc4208.lsm (cropped)	1.17	202.222	175.847
wt_uascdc42	wt_uascdc424460	wt_uascdc4208.lsm (cropped)	0.303	214.133	193.368
wt_uascdc42	wt_uascdc424462	wt_uascdc4208.lsm (cropped)	8.42	226.687	194.285
wt_uascdc42	wt_uascdc424463	wt_uascdc4208.lsm (cropped)	1.15	214.806	180.787
wt_uascdc42	wt_uascdc424464	wt_uascdc4208.lsm (cropped)	0.319	197.622	181.906
wt_uascdc42	wt_uascdc424465	wt_uascdc4208.lsm (cropped)	2.8	215.752	201.556
wt_uascdc42	wt_uascdc424466	wt_uascdc4208.lsm (cropped)	1.18	220.902	189.767
wt_uascdc42	wt_uascdc424467	wt_uascdc4208.lsm (cropped)	3.09	215.395	183.244
wt_uascdc42	wt_uascdc424468	wt_uascdc4208.lsm (cropped)	4.23	219.321	192.952
wt_uascdc42	wt_uascdc424469	wt_uascdc4208.lsm (cropped)	2.4	215.477	191.252
wt_uascdc42	wt_uascdc424470	wt_uascdc4208.lsm (cropped)	3.43	220.656	198.381
wt_uascdc42	wt_uascdc424471	wt_uascdc4208.lsm (cropped)	0.681	203.029	172.008
wt_uascdc42	wt_uascdc424472	wt_uascdc4208.lsm (cropped)	0.476	209.929	173.939
wt_uascdc42	wt_uascdc424473	wt_uascdc4208.lsm (cropped)	2.7	223.587	191.49
wt_uascdc42	wt_uascdc424474	wt_uascdc4208.lsm (cropped)	4.26	224.623	188.961
wt_uascdc42	wt_uascdc424475	wt_uascdc4208.lsm (cropped)	1.85	210.493	182.336
wt_uascdc42	wt_uascdc424477	wt_uascdc4208.lsm (cropped)	0.492	202.838	165.553
wt_uascdc42	wt_uascdc424478	wt_uascdc4208.lsm (cropped)	1.9	215.716	184.915
wt_uascdc42	wt_uascdc424479	wt_uascdc4208.lsm (cropped)	3.68	214.977	179.902
wt_uascdc42	wt_uascdc424480	wt_uascdc4208.lsm (cropped)	0.773	201.765	181.21
wt_uascdc42	wt_uascdc424481	wt_uascdc4208.lsm (cropped)	0.551	195.843	187.925
wt_uascdc42	wt_uascdc424482	wt_uascdc4208.lsm (cropped)	1.81	208.183	181.243
wt_uascdc42	wt_uascdc424483	wt_uascdc4208.lsm (cropped)	1.23	217.069	168.281
wt_uascdc42	wt_uascdc424484	wt_uascdc4208.lsm (cropped)	0.454	203.702	186.076
wt_uascdc42	wt_uascdc424485	wt_uascdc4208.lsm (cropped)	0.378	214.925	174.937
wt_uascdc42	wt_uascdc424486	wt_uascdc4208.lsm (cropped)	0.362	209.68	174.377
wt_uascdc42	wt_uascdc424487	wt_uascdc4208.lsm (cropped)	0.898	215.39	177.861
wt_uascdc42	wt_uascdc424488	wt_uascdc4208.lsm (cropped)	0.481	199.454	167.512
wt_uascdc42	wt_uascdc424489	wt_uascdc4208.lsm (cropped)	0.406	201.53	181.514
wt_uascdc42	wt_uascdc424490	wt_uascdc4208.lsm (cropped)	0.346	192.841	201.397
wt_uascdc42	wt_uascdc424491	wt_uascdc4208.lsm (cropped)	0.222	190.69	167.434
wt_uascdc42	wt_uascdc424492	wt_uascdc4208.lsm (cropped)	0.535	206.22	162.047
wt_uascdc42	wt_uascdc424493	wt_uascdc4208.lsm (cropped)	0.692	214.4	165.054
wt_uascdc42	wt_uascdc424494	wt_uascdc4208.lsm (cropped)	3.81	225.263	193.764
wt_uascdc42	wt_uascdc424495	wt_uascdc4208.lsm (cropped)	1.85	210.104	186.12
wt_uascdc42	wt_uascdc424496	wt_uascdc4208.lsm (cropped)	2.82	211.398	180.597
wt_uascdc42	wt_uascdc424498	wt_uascdc4208.lsm (cropped)	0.86	212.863	174.875
wt_uascdc42	wt_uascdc424499	wt_uascdc4208.lsm (cropped)	3.17	224.573	186.706
wt_uascdc42	wt_uascdc424500	wt_uascdc4208.lsm (cropped)	4.18	233.292	206.532
wt_uascdc42	wt_uascdc424501	wt_uascdc4208.lsm (cropped)	0.968	215.42	189.708
wt_uascdc42	wt_uascdc424502	wt_uascdc4208.lsm (cropped)	2.97	219.036	193.821
wt_uascdc42	wt_uascdc424503	wt_uascdc4208.lsm (cropped)	4.43	216.236	187.896
wt_uascdc42	wt_uascdc424504	wt_uascdc4208.lsm (cropped)	4.74	227.138	192.331
wt_uascdc42	wt_uascdc424505	wt_uascdc4208.lsm (cropped)	1.65	217.855	182.159
wt_uascdc42	wt_uascdc424508	wt_uascdc4208.lsm (cropped)	6.16	227.64	205.402
wt_uascdc42	wt_uascdc424509	wt_uascdc4208.lsm (cropped)	2.47	219.357	188.766
wt_uascdc42	wt_uascdc424510	wt_uascdc4208.lsm (cropped)	4.26	221.692	185.385
wt_uascdc42	wt_uascdc424511	wt_uascdc4208.lsm (cropped)	1.21	216.739	183.631
wt_uascdc42	wt_uascdc424512	wt_uascdc4208.lsm (cropped)	3.27	213.32	190.379
wt_uascdc42	wt_uascdc424513	wt_uascdc4208.lsm (cropped)	2.79	219.046	190.078
wt_uascdc42	wt_uascdc424515	wt_uascdc4208.lsm (cropped)	3	204.073	176.802
wt_uascdc42	wt_uascdc424516	wt_uascdc4208.lsm (cropped)	4.62	225.566	190.847
wt_uascdc42	wt_uascdc424517	wt_uascdc4208.lsm (cropped)	2.96	225.801	191.073
wt_uascdc42	wt_uascdc424520	wt_uascdc4208.lsm (cropped)	2.49	227.947	208.265
wt_uascdc42	wt_uascdc424522	wt_uascdc4208.lsm (cropped)	13.65	228.85	196.061
wt_uascdc42	wt_uascdc424525	wt_uascdc4208.lsm (cropped)	2.1	205.598	186.072
wt_uascdc42	wt_uascdc424526	wt_uascdc4208.lsm (cropped)	3.54	215.375	195.336
wt_uascdc42	wt_uascdc424528	wt_uascdc4208.lsm (cropped)	0.384	199.526	221.881
wt_uascdc42	wt_uascdc424529	wt_uascdc4208.lsm (cropped)	1.74	216.753	196.124
wt_uascdc42	wt_uascdc424530	wt_uascdc4208.lsm (cropped)	2.4	220.712	187.092
wt_uascdc42	wt_uascdc424531	wt_uascdc4208.lsm (cropped)	6.04	219.51	183.75
wt_uascdc42	wt_uascdc424532	wt_uascdc4208.lsm (cropped)	0.724	202.392	170.065
wt_uascdc42	wt_uascdc424534	wt_uascdc4208.lsm (cropped)	3.21	227.307	203.203
wt_uascdc42	wt_uascdc424535	wt_uascdc4208.lsm (cropped)	0.227	207.209	195.382
wt_uascdc42	wt_uascdc424536	wt_uascdc4208.lsm (cropped)	2.41	224.946	196.126
wt_uascdc42	wt_uascdc424537	wt_uascdc4208.lsm (cropped)	1.65	206.911	189.124
wt_uascdc42	wt_uascdc424538	wt_uascdc4208.lsm (cropped)	1.42	209.825	183.544
wt_uascdc42	wt_uascdc424539	wt_uascdc4208.lsm (cropped)	24.97	231.601	203.121
wt_uascdc42	wt_uascdc424540	wt_uascdc4208.lsm (cropped)	0.303	196.237	170.134
wt_uascdc42	wt_uascdc424541	wt_uascdc4208.lsm (cropped)	1.42	209.111	173.637
wt_uascdc42	wt_uascdc424542	wt_uascdc4208.lsm (cropped)	1.39	212.094	183.089
wt_uascdc42	wt_uascdc424543	wt_uascdc4208.lsm (cropped)	0.8	216.095	192.484
wt_uascdc42	wt_uascdc424544	wt_uascdc4208.lsm (cropped)	0.557	203.067	186.386
wt_uascdc42	wt_uascdc424545	wt_uascdc4208.lsm (cropped)	0.524	203.277	198.242
wt_uascdc42	wt_uascdc424546	wt_uascdc4208.lsm (cropped)	0.287	193.144	169.892
wt_uascdc42	wt_uascdc424547	wt_uascdc4208.lsm (cropped)	2.34	209.123	189.504
wt_uascdc42	wt_uascdc424548	wt_uascdc4208.lsm (cropped)	0.346	208.41	169.24
wt_uascdc42	wt_uascdc424549	wt_uascdc4208.lsm (cropped)	2.44	207.666	179.007
wt_uascdc42	wt_uascdc424550	wt_uascdc4208.lsm (cropped)	0.2	198.147	175.637
wt_uascdc42	wt_uascdc424551	wt_uascdc4208.lsm (cropped)	0.249	198.313	173.418
wt_uascdc42	wt_uascdc424552	wt_uascdc4208.lsm (cropped)	0.335	203.189	169.205
wt_uascdc42	wt_uascdc424553	wt_uascdc4208.lsm (cropped)	0.8	218.652	173.131
wt_uascdc42	wt_uascdc424554	wt_uascdc4208.lsm (cropped)	1.14	213.331	180.064
wt_uascdc42	wt_uascdc424555	wt_uascdc4208.lsm (cropped)	1.05	225.144	184.051
wt_uascdc42	wt_uascdc424556	wt_uascdc4208.lsm (cropped)	0.697	210.715	206.828
wt_uascdc42	wt_uascdc424558	wt_uascdc4208.lsm (cropped)	2.59	212.903	193.179
wt_uascdc42	wt_uascdc424559	wt_uascdc4208.lsm (cropped)	0.757	205.984	176.32
wt_uascdc42	wt_uascdc424560	wt_uascdc4208.lsm (cropped)	0.497	193.426	169.461
wt_uascdc42	wt_uascdc424561	wt_uascdc4208.lsm (cropped)	1.23	209.712	161.614
wt_uascdc42	wt_uascdc424562	wt_uascdc4208.lsm (cropped)	0.557	197.96	173.838
wt_uascdc42	wt_uascdc424563	wt_uascdc4208.lsm (cropped)	0.687	206.707	177.145
wt_uascdc42	wt_uascdc424565	wt_uascdc4208.lsm (cropped)	1.16	209.923	170.155
wt_uascdc42	wt_uascdc424566	wt_uascdc4208.lsm (cropped)	0.87	211.112	192.148
wt_uascdc42	wt_uascdc424567	wt_uascdc4208.lsm (cropped)	6.18	225.043	195.941
wt_uascdc42	wt_uascdc424568	wt_uascdc4208.lsm (cropped)	1.37	204.681	166.076
wt_uascdc42	wt_uascdc424571	wt_uascdc4208.lsm (cropped)	0.287	201.058	186.307
wt_uascdc42	wt_uascdc424572	wt_uascdc4208.lsm (cropped)	0.351	201.301	184.913
wt_uascdc42	wt_uascdc424573	wt_uascdc4208.lsm (cropped)	1.71	213.605	191.59
wt_uascdc42	wt_uascdc424574	wt_uascdc4208.lsm (cropped)	1.61	218.946	177.016
wt_uascdc42	wt_uascdc424575	wt_uascdc4208.lsm (cropped)	1.44	199.605	179.831
wt_uascdc42	wt_uascdc424576	wt_uascdc4208.lsm (cropped)	0.892	218.54	172.573
wt_uascdc42	wt_uascdc424577	wt_uascdc4208.lsm (cropped)	4.93	220.526	196.075
wt_uascdc42	wt_uascdc424579	wt_uascdc4208.lsm (cropped)	2.9	223.993	187.251
wt_uascdc42	wt_uascdc424581	wt_uascdc4208.lsm (cropped)	3.58	218.705	187.752
wt_uascdc42	wt_uascdc424583	wt_uascdc4208.lsm (cropped)	2.75	221.434	181.352
wt_uascdc42	wt_uascdc424584	wt_uascdc4208.lsm (cropped)	1.83	215.974	184.497
wt_uascdc42	wt_uascdc424585	wt_uascdc4208.lsm (cropped)	5.11	227.664	199.399
wt_uascdc42	wt_uascdc424586	wt_uascdc4208.lsm (cropped)	0.47	199.888	170.6
wt_uascdc42	wt_uascdc424587	wt_uascdc4208.lsm (cropped)	5.84	214.487	191.19
wt_uascdc42	wt_uascdc424588	wt_uascdc4208.lsm (cropped)	3.21	206.576	169.921
wt_uascdc42	wt_uascdc424589	wt_uascdc4208.lsm (cropped)	5.55	211.512	177.792
wt_uascdc42	wt_uascdc424591	wt_uascdc4208.lsm (cropped)	5.97	216.709	194.558
wt_uascdc42	wt_uascdc424592	wt_uascdc4208.lsm (cropped)	1.28	211.771	163.852
wt_uascdc42	wt_uascdc424593	wt_uascdc4208.lsm (cropped)	1.57	205.323	177.549
wt_uascdc42	wt_uascdc426807	wt_uascdc4210.lsm (cropped)	0.384	170.794	188.437
wt_uascdc42	wt_uascdc426808	wt_uascdc4210.lsm (cropped)	1.19	185.179	175.885
wt_uascdc42	wt_uascdc426809	wt_uascdc4210.lsm (cropped)	0.573	178.11	163.854
wt_uascdc42	wt_uascdc426810	wt_uascdc4210.lsm (cropped)	0.238	168.699	162.548
wt_uascdc42	wt_uascdc426811	wt_uascdc4210.lsm (cropped)	1.65	187.719	173.567
wt_uascdc42	wt_uascdc426812	wt_uascdc4210.lsm (cropped)	0.584	174.447	170.367
wt_uascdc42	wt_uascdc426813	wt_uascdc4210.lsm (cropped)	0.33	168.718	212.615
wt_uascdc42	wt_uascdc426814	wt_uascdc4210.lsm (cropped)	0.27	177.53	167.109
wt_uascdc42	wt_uascdc426815	wt_uascdc4210.lsm (cropped)	0.514	177.286	173.074
wt_uascdc42	wt_uascdc426817	wt_uascdc4210.lsm (cropped)	0.898	173.302	157.726
wt_uascdc42	wt_uascdc426818	wt_uascdc4210.lsm (cropped)	0.26	164.368	154.613
wt_uascdc42	wt_uascdc426819	wt_uascdc4210.lsm (cropped)	0.487	181.856	155.438
wt_uascdc42	wt_uascdc426820	wt_uascdc4210.lsm (cropped)	0.941	178.593	188.84
wt_uascdc42	wt_uascdc426821	wt_uascdc4210.lsm (cropped)	1.09	175.258	175.677
wt_uascdc42	wt_uascdc426822	wt_uascdc4210.lsm (cropped)	4.06	188.465	177.483
wt_uascdc42	wt_uascdc426823	wt_uascdc4210.lsm (cropped)	0.205	168.325	152.96
wt_uascdc42	wt_uascdc426824	wt_uascdc4210.lsm (cropped)	0.406	170.596	161.253
wt_uascdc42	wt_uascdc426825	wt_uascdc4210.lsm (cropped)	0.876	177.243	171.731
wt_uascdc42	wt_uascdc426826	wt_uascdc4210.lsm (cropped)	2.57	192.903	172.814
wt_uascdc42	wt_uascdc426827	wt_uascdc4210.lsm (cropped)	1.68	192.82	182.116
wt_uascdc42	wt_uascdc426828	wt_uascdc4210.lsm (cropped)	0.665	176.049	165.734
wt_uascdc42	wt_uascdc426829	wt_uascdc4210.lsm (cropped)	0.346	172.873	171.328
wt_uascdc42	wt_uascdc426830	wt_uascdc4210.lsm (cropped)	2.62	189.105	179.025
wt_uascdc42	wt_uascdc426831	wt_uascdc4210.lsm (cropped)	1.35	190.853	171.634
wt_uascdc42	wt_uascdc426832	wt_uascdc4210.lsm (cropped)	1.27	168.219	151.657
wt_uascdc42	wt_uascdc426833	wt_uascdc4210.lsm (cropped)	0.287	170.871	180.54
wt_uascdc42	wt_uascdc426834	wt_uascdc4210.lsm (cropped)	1.91	194.694	181.241
wt_uascdc42	wt_uascdc426835	wt_uascdc4210.lsm (cropped)	1.15	185.556	172.508
wt_uascdc42	wt_uascdc426836	wt_uascdc4210.lsm (cropped)	1.52	177.491	169.298
wt_uascdc42	wt_uascdc426837	wt_uascdc4210.lsm (cropped)	5.11	181.408	177.183
wt_uascdc42	wt_uascdc426838	wt_uascdc4210.lsm (cropped)	0.222	168.649	166.797
wt_uascdc42	wt_uascdc426839	wt_uascdc4210.lsm (cropped)	1.76	187.069	163.966
wt_uascdc42	wt_uascdc426840	wt_uascdc4210.lsm (cropped)	3.74	179.581	167.318
wt_uascdc42	wt_uascdc426841	wt_uascdc4210.lsm (cropped)	0.449	176.532	144.855
wt_uascdc42	wt_uascdc426842	wt_uascdc4210.lsm (cropped)	1.04	175.716	174.994
wt_uascdc42	wt_uascdc426843	wt_uascdc4210.lsm (cropped)	1.11	178.194	187.897
wt_uascdc42	wt_uascdc426844	wt_uascdc4210.lsm (cropped)	0.254	167.625	171.617
wt_uascdc42	wt_uascdc426845	wt_uascdc4210.lsm (cropped)	0.238	166.754	167.405
wt_uascdc42	wt_uascdc426846	wt_uascdc4210.lsm (cropped)	1.63	180.15	183.503
wt_uascdc42	wt_uascdc426847	wt_uascdc4210.lsm (cropped)	0.324	174.277	164.35
wt_uascdc42	wt_uascdc426848	wt_uascdc4210.lsm (cropped)	0.73	182.82	155.126
wt_uascdc42	wt_uascdc426849	wt_uascdc4210.lsm (cropped)	0.595	176.509	152.378
wt_uascdc42	wt_uascdc426850	wt_uascdc4210.lsm (cropped)	1.66	190.475	160.514
wt_uascdc42	wt_uascdc426851	wt_uascdc4210.lsm (cropped)	0.773	175.612	171.02
wt_uascdc42	wt_uascdc426853	wt_uascdc4210.lsm (cropped)	0.692	173.518	173.725
wt_uascdc42	wt_uascdc426854	wt_uascdc4210.lsm (cropped)	2.96	187.471	179.04
wt_uascdc42	wt_uascdc426855	wt_uascdc4210.lsm (cropped)	0.27	174.049	152.806
wt_uascdc42	wt_uascdc426856	wt_uascdc4210.lsm (cropped)	0.476	168.526	153.48
wt_uascdc42	wt_uascdc426857	wt_uascdc4210.lsm (cropped)	3.55	192.894	172.732
wt_uascdc42	wt_uascdc426859	wt_uascdc4210.lsm (cropped)	1.62	181.75	164.534
wt_uascdc42	wt_uascdc426860	wt_uascdc4210.lsm (cropped)	0.449	165.985	137.83
wt_uascdc42	wt_uascdc426861	wt_uascdc4210.lsm (cropped)	0.497	166.832	157.075
wt_uascdc42	wt_uascdc426862	wt_uascdc4210.lsm (cropped)	2.05	175.889	170.891
wt_uascdc42	wt_uascdc426863	wt_uascdc4210.lsm (cropped)	2.5	182.659	175.644
wt_uascdc42	wt_uascdc426864	wt_uascdc4210.lsm (cropped)	0.989	185.864	178.663
wt_uascdc42	wt_uascdc426865	wt_uascdc4210.lsm (cropped)	0.914	186.468	163.123
wt_uascdc42	wt_uascdc426866	wt_uascdc4210.lsm (cropped)	0.411	172.852	150.742
wt_uascdc42	wt_uascdc426867	wt_uascdc4210.lsm (cropped)	0.389	168.604	146.509
wt_uascdc42	wt_uascdc426868	wt_uascdc4210.lsm (cropped)	0.378	171.903	153.692
wt_uascdc42	wt_uascdc426869	wt_uascdc4210.lsm (cropped)	0.519	179.165	158.39
wt_uascdc42	wt_uascdc426870	wt_uascdc4210.lsm (cropped)	0.243	177.27	163.961
wt_uascdc42	wt_uascdc426871	wt_uascdc4210.lsm (cropped)	0.73	178.801	159.765
wt_uascdc42	wt_uascdc426872	wt_uascdc4210.lsm (cropped)	0.438	169.295	162.4
wt_uascdc42	wt_uascdc426873	wt_uascdc4210.lsm (cropped)	2.26	193.249	196.96
wt_uascdc42	wt_uascdc426874	wt_uascdc4210.lsm (cropped)	5.02	209.436	182.948
wt_uascdc42	wt_uascdc426875	wt_uascdc4210.lsm (cropped)	0.351	177.638	164.578
wt_uascdc42	wt_uascdc426876	wt_uascdc4210.lsm (cropped)	2.69	197.671	180.16
wt_uascdc42	wt_uascdc426877	wt_uascdc4210.lsm (cropped)	0.881	179.552	159.206
wt_uascdc42	wt_uascdc426878	wt_uascdc4210.lsm (cropped)	1.75	178.777	171.359
wt_uascdc42	wt_uascdc426880	wt_uascdc4210.lsm (cropped)	4.4	198.102	176.225
wt_uascdc42	wt_uascdc426881	wt_uascdc4210.lsm (cropped)	0.362	175.081	141.732
wt_uascdc42	wt_uascdc426882	wt_uascdc4210.lsm (cropped)	0.476	169.167	155.881
wt_uascdc42	wt_uascdc426883	wt_uascdc4210.lsm (cropped)	2.34	187.894	175.257
wt_uascdc42	wt_uascdc426885	wt_uascdc4210.lsm (cropped)	1.58	173.306	177.674
wt_uascdc42	wt_uascdc426886	wt_uascdc4210.lsm (cropped)	0.541	168.836	156.028
wt_uascdc42	wt_uascdc426887	wt_uascdc4210.lsm (cropped)	0.373	171.732	146.386
wt_uascdc42	wt_uascdc426889	wt_uascdc4210.lsm (cropped)	3.48	180.383	170.095
wt_uascdc42	wt_uascdc426890	wt_uascdc4210.lsm (cropped)	0.2	168.878	147.202
wt_uascdc42	wt_uascdc426891	wt_uascdc4210.lsm (cropped)	0.47	170.242	149.942
wt_uascdc42	wt_uascdc426892	wt_uascdc4210.lsm (cropped)	8.44	191.423	178.123
wt_uascdc42	wt_uascdc426894	wt_uascdc4210.lsm (cropped)	1.68	180.56	175.249
wt_uascdc42	wt_uascdc426895	wt_uascdc4210.lsm (cropped)	0.324	170.781	162.704
wt_uascdc42	wt_uascdc426896	wt_uascdc4210.lsm (cropped)	3.55	185.458	192.532
wt_uascdc42	wt_uascdc426897	wt_uascdc4210.lsm (cropped)	8.15	183.312	182.89
wt_uascdc42	wt_uascdc426898	wt_uascdc4210.lsm (cropped)	0.973	172.514	149.569
wt_uascdc42	wt_uascdc426899	wt_uascdc4210.lsm (cropped)	0.757	181.448	155.154
wt_uascdc42	wt_uascdc426900	wt_uascdc4210.lsm (cropped)	0.535	182.065	159.207
wt_uascdc42	wt_uascdc426901	wt_uascdc4210.lsm (cropped)	1.31	187.395	189.999
wt_uascdc42	wt_uascdc426902	wt_uascdc4210.lsm (cropped)	0.411	169.978	162.613
wt_uascdc42	wt_uascdc426903	wt_uascdc4210.lsm (cropped)	2.04	179.188	194.763
wt_uascdc42	wt_uascdc426905	wt_uascdc4210.lsm (cropped)	0.925	184.05	166.646
wt_uascdc42	wt_uascdc426906	wt_uascdc4210.lsm (cropped)	1.97	174.821	161.894
wt_uascdc42	wt_uascdc426907	wt_uascdc4210.lsm (cropped)	3.3	189.147	180.207
wt_uascdc42	wt_uascdc426908	wt_uascdc4210.lsm (cropped)	0.762	173.409	201.929
wt_uascdc42	wt_uascdc426909	wt_uascdc4210.lsm (cropped)	1.79	174.925	195.189
wt_uascdc42	wt_uascdc426910	wt_uascdc4210.lsm (cropped)	0.406	177.997	165.694
wt_uascdc42	wt_uascdc426911	wt_uascdc4210.lsm (cropped)	1.25	177.691	162.42
wt_uascdc42	wt_uascdc426912	wt_uascdc4210.lsm (cropped)	1.85	182.473	167.793
wt_uascdc42	wt_uascdc426914	wt_uascdc4210.lsm (cropped)	1.24	172.269	150.279
wt_uascdc42	wt_uascdc426915	wt_uascdc4210.lsm (cropped)	2.38	180.845	156.005
wt_uascdc42	wt_uascdc426916	wt_uascdc4210.lsm (cropped)	0.735	173.923	147.003
wt_uascdc42	wt_uascdc426917	wt_uascdc4210.lsm (cropped)	0.47	168.894	179.038
wt_uascdc42	wt_uascdc426918	wt_uascdc4210.lsm (cropped)	0.378	173.876	162.59
wt_uascdc42	wt_uascdc426919	wt_uascdc4210.lsm (cropped)	0.481	172.015	164.009
wt_uascdc42	wt_uascdc426920	wt_uascdc4210.lsm (cropped)	3.55	181.722	172.884
wt_uascdc42	wt_uascdc426921	wt_uascdc4210.lsm (cropped)	1.54	178.906	172.157
wt_uascdc42	wt_uascdc426923	wt_uascdc4210.lsm (cropped)	0.995	171.451	153.266
wt_uascdc42	wt_uascdc426924	wt_uascdc4210.lsm (cropped)	4.23	192.828	180.018
wt_uascdc42	wt_uascdc426926	wt_uascdc4210.lsm (cropped)	1.45	177.822	155.708
wt_uascdc42	wt_uascdc426927	wt_uascdc4210.lsm (cropped)	0.249	167.305	147.094
wt_uascdc42	wt_uascdc426929	wt_uascdc4210.lsm (cropped)	1.55	167.563	165.807
wt_uascdc42	wt_uascdc426930	wt_uascdc4210.lsm (cropped)	0.216	172.45	161.471
wt_uascdc42	wt_uascdc426931	wt_uascdc4210.lsm (cropped)	1.5	171.343	149.334
wt_uascdc42	wt_uascdc426933	wt_uascdc4210.lsm (cropped)	0.643	170.49	128.805
wt_uascdc42	wt_uascdc426934	wt_uascdc4210.lsm (cropped)	0.476	173.864	153.783
wt_uascdc42	wt_uascdc426935	wt_uascdc4210.lsm (cropped)	0.26	171.267	142.233
wt_uascdc42	wt_uascdc426937	wt_uascdc4210.lsm (cropped)	1.66	186.409	209.139
wt_uascdc42	wt_uascdc426938	wt_uascdc4210.lsm (cropped)	8.59	185.529	171.109
wt_uascdc42	wt_uascdc426939	wt_uascdc4210.lsm (cropped)	8.3	190.322	202.517
wt_uascdc42	wt_uascdc426940	wt_uascdc4210.lsm (cropped)	2.13	189.198	171.422
wt_uascdc42	wt_uascdc426941	wt_uascdc4210.lsm (cropped)	9.82	203.297	187.837
wt_uascdc42	wt_uascdc426942	wt_uascdc4210.lsm (cropped)	3.93	196.36	196.839
wt_uascdc42	wt_uascdc426943	wt_uascdc4210.lsm (cropped)	1.1	170.774	145.99
wt_uascdc42	wt_uascdc426944	wt_uascdc4210.lsm (cropped)	4.37	190.885	168.705
wt_uascdc42	wt_uascdc426945	wt_uascdc4210.lsm (cropped)	0.806	173.218	162.963
wt_uascdc42	wt_uascdc426946	wt_uascdc4210.lsm (cropped)	3.24	188.062	172.405
wt_uascdc42	wt_uascdc426947	wt_uascdc4210.lsm (cropped)	0.222	170.247	152.315
wt_uascdc42	wt_uascdc426948	wt_uascdc4210.lsm (cropped)	0.551	175.639	160.64
wt_uascdc42	wt_uascdc426949	wt_uascdc4210.lsm (cropped)	1.67	181.191	174.939
wt_uascdc42	wt_uascdc426950	wt_uascdc4210.lsm (cropped)	1.62	178.368	177.871
wt_uascdc42	wt_uascdc426952	wt_uascdc4210.lsm (cropped)	0.762	181.296	153.858
wt_uascdc42	wt_uascdc426953	wt_uascdc4210.lsm (cropped)	1.04	180.881	148.515
wt_uascdc42	wt_uascdc426954	wt_uascdc4210.lsm (cropped)	0.492	169.065	125.036
wt_uascdc42	wt_uascdc426955	wt_uascdc4210.lsm (cropped)	1.71	179.708	172.615
wt_uascdc42	wt_uascdc426957	wt_uascdc4210.lsm (cropped)	1.68	177.026	171.247
wt_uascdc42	wt_uascdc426958	wt_uascdc4210.lsm (cropped)	1.3	172.065	156.661
wt_uascdc42	wt_uascdc426960	wt_uascdc4210.lsm (cropped)	2.85	190.697	188.382
wt_uascdc42	wt_uascdc426961	wt_uascdc4210.lsm (cropped)	1.64	175.836	195.015
wt_uascdc42	wt_uascdc426962	wt_uascdc4210.lsm (cropped)	0.449	166.91	147.607
wt_uascdc42	wt_uascdc426963	wt_uascdc4210.lsm (cropped)	1.53	176.831	176.763
wt_uascdc42	wt_uascdc426964	wt_uascdc4210.lsm (cropped)	1.73	177.887	163.136
wt_uascdc42	wt_uascdc426965	wt_uascdc4210.lsm (cropped)	0.395	172.377	142.365
wt_uascdc42	wt_uascdc426966	wt_uascdc4210.lsm (cropped)	0.416	170.712	158.695
wt_uascdc42	wt_uascdc426967	wt_uascdc4210.lsm (cropped)	0.362	173.053	145.462
wt_uascdc42	wt_uascdc426969	wt_uascdc4210.lsm (cropped)	2.2	188.931	171.544
wt_uascdc42	wt_uascdc426970	wt_uascdc4210.lsm (cropped)	1.29	180.84	178.508
wt_uascdc42	wt_uascdc426972	wt_uascdc4210.lsm (cropped)	2.12	184.54	175.927
wt_uascdc42	wt_uascdc426973	wt_uascdc4210.lsm (cropped)	0.33	175.724	167.894
wt_uascdc42	wt_uascdc426974	wt_uascdc4210.lsm (cropped)	2.03	178.016	165.835
wt_uascdc42	wt_uascdc426975	wt_uascdc4210.lsm (cropped)	2.62	188.647	176.934
wt_uascdc42	wt_uascdc426976	wt_uascdc4210.lsm (cropped)	1.02	172.475	155.238
wt_uascdc42	wt_uascdc426977	wt_uascdc4210.lsm (cropped)	3.61	179.919	184.564
wt_uascdc42	wt_uascdc426978	wt_uascdc4210.lsm (cropped)	0.438	176.337	155.239
wt_uascdc42	wt_uascdc426979	wt_uascdc4210.lsm (cropped)	6.72	205.992	194.723
wt_uascdc42	wt_uascdc426980	wt_uascdc4210.lsm (cropped)	0.346	175.077	142.575
wt_uascdc42	wt_uascdc426981	wt_uascdc4210.lsm (cropped)	2.1	180.994	181.579
wt_uascdc42	wt_uascdc426982	wt_uascdc4210.lsm (cropped)	2.14	184.337	185.428
wt_uascdc42	wt_uascdc426983	wt_uascdc4210.lsm (cropped)	3.25	195.417	177.589
wt_uascdc42	wt_uascdc426984	wt_uascdc4210.lsm (cropped)	0.557	179.904	167.925
wt_uascdc42	wt_uascdc426985	wt_uascdc4210.lsm (cropped)	1.22	181.779	167.781
wt_uascdc42	wt_uascdc426986	wt_uascdc4210.lsm (cropped)	2.12	185.767	158.914
wt_uascdc42	wt_uascdc426987	wt_uascdc4210.lsm (cropped)	0.779	188.45	174.178
wt_uascdc42	wt_uascdc426989	wt_uascdc4210.lsm (cropped)	0.254	169.323	175.796
wt_uascdc42	wt_uascdc426990	wt_uascdc4210.lsm (cropped)	1.4	180.039	180.53
wt_uascdc42	wt_uascdc426991	wt_uascdc4210.lsm (cropped)	3.25	202.404	203.388
wt_uascdc42	wt_uascdc426992	wt_uascdc4210.lsm (cropped)	2.09	178.024	174.776
wt_uascdc42	wt_uascdc426993	wt_uascdc4210.lsm (cropped)	6.31	198.218	168.134
wt_uascdc42	wt_uascdc426995	wt_uascdc4210.lsm (cropped)	8.99	204.271	182.65
wt_uascdc42	wt_uascdc426997	wt_uascdc4210.lsm (cropped)	0.541	171.195	158.642
wt_uascdc42	wt_uascdc426998	wt_uascdc4210.lsm (cropped)	1.14	175.028	157.734
wt_uascdc42	wt_uascdc426999	wt_uascdc4210.lsm (cropped)	1.04	176.245	158.614
wt_uascdc42	wt_uascdc427000	wt_uascdc4210.lsm (cropped)	4	179.786	168.791
wt_uascdc42	wt_uascdc427001	wt_uascdc4210.lsm (cropped)	6.8	190.231	176.327
wt_uascdc42	wt_uascdc427003	wt_uascdc4210.lsm (cropped)	0.351	167.785	161.478
wt_uascdc42	wt_uascdc427004	wt_uascdc4210.lsm (cropped)	0.989	172.543	181.118
wt_uascdc42	wt_uascdc427005	wt_uascdc4210.lsm (cropped)	0.73	170.069	158.822
wt_uascdc42	wt_uascdc427006	wt_uascdc4210.lsm (cropped)	2.8	186.994	182.631
wt_uascdc42	wt_uascdc427007	wt_uascdc4210.lsm (cropped)	8.78	191.558	188.489
wt_uascdc42	wt_uascdc427009	wt_uascdc4210.lsm (cropped)	2.58	194.913	181.458
wt_uascdc42	wt_uascdc427010	wt_uascdc4210.lsm (cropped)	9.35	204.418	189.479
wt_uascdc42	wt_uascdc427011	wt_uascdc4210.lsm (cropped)	0.573	177.296	154.599
wt_uascdc42	wt_uascdc427012	wt_uascdc4210.lsm (cropped)	4.08	198.219	180.25
wt_uascdc42	wt_uascdc427013	wt_uascdc4210.lsm (cropped)	1.27	181.884	177.084
wt_uascdc42	wt_uascdc427014	wt_uascdc4210.lsm (cropped)	7.3	193.075	179.367
wt_uascdc42	wt_uascdc427015	wt_uascdc4210.lsm (cropped)	10.99	197.361	187.184
wt_uascdc42	wt_uascdc427016	wt_uascdc4210.lsm (cropped)	0.665	178.458	166.942
wt_uascdc42	wt_uascdc427017	wt_uascdc4210.lsm (cropped)	2	184.944	172.077
wt_uascdc42	wt_uascdc427018	wt_uascdc4210.lsm (cropped)	2.08	192.491	174.133
wt_uascdc42	wt_uascdc427019	wt_uascdc4210.lsm (cropped)	10.98	213.392	197.902
wt_uascdc42	wt_uascdc427020	wt_uascdc4210.lsm (cropped)	1.19	178.691	148.609
wt_uascdc42	wt_uascdc427021	wt_uascdc4210.lsm (cropped)	10.79	210.889	199.421
wt_uascdc42	wt_uascdc427022	wt_uascdc4210.lsm (cropped)	4.14	186.71	173.892
wt_uascdc42	wt_uascdc427023	wt_uascdc4210.lsm (cropped)	0.335	170.281	153.512
wt_uascdc42	wt_uascdc427024	wt_uascdc4210.lsm (cropped)	4.1	186.694	165.297
wt_uascdc42	wt_uascdc427025	wt_uascdc4210.lsm (cropped)	8.76	188.115	176.27
wt_uascdc42	wt_uascdc427026	wt_uascdc4210.lsm (cropped)	0.86	172.954	174.687
wt_uascdc42	wt_uascdc427027	wt_uascdc4210.lsm (cropped)	2.49	184.162	196.204
wt_uascdc42	wt_uascdc427028	wt_uascdc4210.lsm (cropped)	1.65	184.938	170.207
wt_uascdc42	wt_uascdc427029	wt_uascdc4210.lsm (cropped)	0.87	173.512	168.34
wt_uascdc42	wt_uascdc427030	wt_uascdc4210.lsm (cropped)	4.76	178.433	168.343
wt_uascdc42	wt_uascdc427031	wt_uascdc4210.lsm (cropped)	3.24	180.086	166.817
wt_uascdc42	wt_uascdc427032	wt_uascdc4210.lsm (cropped)	2.31	180.25	165.781
wt_uascdc42	wt_uascdc427033	wt_uascdc4210.lsm (cropped)	6.19	184.27	175.54
wt_uascdc42	wt_uascdc427034	wt_uascdc4210.lsm (cropped)	0.503	169.205	152.923
wt_uascdc42	wt_uascdc427035	wt_uascdc4210.lsm (cropped)	1.32	181.702	160.589
wt_uascdc42	wt_uascdc427036	wt_uascdc4210.lsm (cropped)	0.395	169.773	142.426
wt_uascdc42	wt_uascdc427037	wt_uascdc4210.lsm (cropped)	2.96	193.25	177.754
wt_uascdc42	wt_uascdc427038	wt_uascdc4210.lsm (cropped)	4.48	186.644	170.268
wt_uascdc42	wt_uascdc427039	wt_uascdc4210.lsm (cropped)	2.77	185.884	173.007
wt_uascdc42	wt_uascdc427040	wt_uascdc4210.lsm (cropped)	3.45	186.53	175.611
wt_uascdc42	wt_uascdc427041	wt_uascdc4210.lsm (cropped)	1.23	172.893	156.291
wt_uascdc42	wt_uascdc427042	wt_uascdc4210.lsm (cropped)	7.59	207.082	186.203
wt_uascdc42	wt_uascdc427043	wt_uascdc4210.lsm (cropped)	0.287	164.54	158.927
wt_uascdc42	wt_uascdc427044	wt_uascdc4210.lsm (cropped)	3.88	183.002	169.695
wt_uascdc42	wt_uascdc427045	wt_uascdc4210.lsm (cropped)	0.319	175.522	158.741
wt_uascdc42	wt_uascdc427047	wt_uascdc4210.lsm (cropped)	6.53	213.607	190.139
wt_uascdc42	wt_uascdc427048	wt_uascdc4210.lsm (cropped)	4.9	185.603	177.724
wt_uascdc42	wt_uascdc427050	wt_uascdc4210.lsm (cropped)	2.84	177.064	154.997
wt_uascdc42	wt_uascdc427051	wt_uascdc4210.lsm (cropped)	1.72	177.119	151.729
wt_uascdc42	wt_uascdc427052	wt_uascdc4210.lsm (cropped)	14.28	197.124	178.324
wt_uascdc42	wt_uascdc427053	wt_uascdc4210.lsm (cropped)	0.454	182.693	144.62
wt_uascdc42	wt_uascdc427054	wt_uascdc4210.lsm (cropped)	0.211	168.918	139.964
wt_uascdc42	wt_uascdc427055	wt_uascdc4210.lsm (cropped)	0.351	169.79	210.234
wt_uascdc42	wt_uascdc429471	wt_uascdc4215.lsm (cropped)	0.2	162.463	116.64
wt_uascdc42	wt_uascdc429472	wt_uascdc4215.lsm (cropped)	1.46	159.786	107.767
wt_uascdc42	wt_uascdc429474	wt_uascdc4215.lsm (cropped)	1.1	170.748	102.301
wt_uascdc42	wt_uascdc429475	wt_uascdc4215.lsm (cropped)	0.411	172.471	110.598
wt_uascdc42	wt_uascdc429477	wt_uascdc4215.lsm (cropped)	0.238	158.683	111.73
wt_uascdc42	wt_uascdc429478	wt_uascdc4215.lsm (cropped)	1.55	161.773	106.33
wt_uascdc42	wt_uascdc429479	wt_uascdc4215.lsm (cropped)	0.568	156.046	109.012
wt_uascdc42	wt_uascdc429480	wt_uascdc4215.lsm (cropped)	0.898	178.696	118.685
wt_uascdc42	wt_uascdc429482	wt_uascdc4215.lsm (cropped)	0.898	179.951	125.299
wt_uascdc42	wt_uascdc429483	wt_uascdc4215.lsm (cropped)	2.22	180.569	114.449
wt_uascdc42	wt_uascdc429484	wt_uascdc4215.lsm (cropped)	5.7	188.412	127.254
wt_uascdc42	wt_uascdc429485	wt_uascdc4215.lsm (cropped)	1.61	162.068	191.844
wt_uascdc42	wt_uascdc429486	wt_uascdc4215.lsm (cropped)	1.64	171.458	124.882
wt_uascdc42	wt_uascdc429487	wt_uascdc4215.lsm (cropped)	2.69	175.505	129.373
wt_uascdc42	wt_uascdc429491	wt_uascdc4215.lsm (cropped)	1.58	160.544	111.593
wt_uascdc42	wt_uascdc429492	wt_uascdc4215.lsm (cropped)	5.19	176.801	117.852
wt_uascdc42	wt_uascdc429493	wt_uascdc4215.lsm (cropped)	3.06	169.252	110.888
wt_uascdc42	wt_uascdc429494	wt_uascdc4215.lsm (cropped)	1.23	189.688	136.726
wt_uascdc42	wt_uascdc429496	wt_uascdc4215.lsm (cropped)	0.876	174.514	109.068
wt_uascdc42	wt_uascdc429498	wt_uascdc4215.lsm (cropped)	0.762	165.374	112.626
wt_uascdc42	wt_uascdc429500	wt_uascdc4215.lsm (cropped)	0.584	166.417	133.178
wt_uascdc42	wt_uascdc429501	wt_uascdc4215.lsm (cropped)	2.16	186.264	113.975
wt_uascdc42	wt_uascdc429502	wt_uascdc4215.lsm (cropped)	2.1	168.73	115.768
wt_uascdc42	wt_uascdc429503	wt_uascdc4215.lsm (cropped)	4.2	172.863	110.969
wt_uascdc42	wt_uascdc429504	wt_uascdc4215.lsm (cropped)	0.692	168.37	107.668
wt_uascdc42	wt_uascdc429505	wt_uascdc4215.lsm (cropped)	0.746	158.223	111.936
wt_uascdc42	wt_uascdc429506	wt_uascdc4215.lsm (cropped)	2.51	177.934	118.801
wt_uascdc42	wt_uascdc429508	wt_uascdc4215.lsm (cropped)	0.216	159.437	145.818
wt_uascdc42	wt_uascdc429509	wt_uascdc4215.lsm (cropped)	0.27	157.918	108
wt_uascdc42	wt_uascdc429511	wt_uascdc4215.lsm (cropped)	4.89	184.827	121.652
wt_uascdc42	wt_uascdc429515	wt_uascdc4215.lsm (cropped)	2.2	161.622	104.544
wt_uascdc42	wt_uascdc429516	wt_uascdc4215.lsm (cropped)	0.211	151.176	102.424
wt_uascdc42	wt_uascdc429518	wt_uascdc4215.lsm (cropped)	0.497	165.219	109.605
wt_uascdc42	wt_uascdc429519	wt_uascdc4215.lsm (cropped)	1.68	170.48	125.389
wt_uascdc42	wt_uascdc429521	wt_uascdc4215.lsm (cropped)	0.746	154.834	103.534
wt_uascdc42	wt_uascdc429522	wt_uascdc4215.lsm (cropped)	0.53	159.029	105.751
wt_uascdc42	wt_uascdc429523	wt_uascdc4215.lsm (cropped)	0.492	157.313	109.479
wt_uascdc42	wt_uascdc429524	wt_uascdc4215.lsm (cropped)	0.649	159.663	101.918
wt_uascdc42	wt_uascdc429525	wt_uascdc4215.lsm (cropped)	0.449	155.354	107.181
wt_uascdc42	wt_uascdc429528	wt_uascdc4215.lsm (cropped)	0.47	173.051	114.059
wt_uascdc42	wt_uascdc429529	wt_uascdc4215.lsm (cropped)	0.503	168.193	112.207
wt_uascdc42	wt_uascdc429530	wt_uascdc4215.lsm (cropped)	1.99	165.4	118.867
wt_uascdc42	wt_uascdc429531	wt_uascdc4215.lsm (cropped)	1.24	165.391	102.774
wt_uascdc42	wt_uascdc429532	wt_uascdc4215.lsm (cropped)	1.11	161.263	108.711
wt_uascdc42	wt_uascdc429534	wt_uascdc4215.lsm (cropped)	1.04	171.169	116.396
wt_uascdc42	wt_uascdc429535	wt_uascdc4215.lsm (cropped)	3.34	179.374	118.166
wt_uascdc42	wt_uascdc429536	wt_uascdc4215.lsm (cropped)	0.335	161.1	121.233
wt_uascdc42	wt_uascdc429537	wt_uascdc4215.lsm (cropped)	0.46	164.032	103.803
wt_uascdc42	wt_uascdc429538	wt_uascdc4215.lsm (cropped)	0.724	168.246	110.829
wt_uascdc42	wt_uascdc429539	wt_uascdc4215.lsm (cropped)	0.854	164.335	104.529
wt_uascdc42	wt_uascdc429540	wt_uascdc4215.lsm (cropped)	2.75	170.54	106.672
wt_uascdc42	wt_uascdc429541	wt_uascdc4215.lsm (cropped)	0.898	174.377	107.266
wt_uascdc42	wt_uascdc429542	wt_uascdc4215.lsm (cropped)	0.833	167.776	108.924
wt_uascdc42	wt_uascdc429543	wt_uascdc4215.lsm (cropped)	3.13	158.646	105.335
wt_uascdc42	wt_uascdc429544	wt_uascdc4215.lsm (cropped)	2.93	174.849	113.753
wt_uascdc42	wt_uascdc429546	wt_uascdc4215.lsm (cropped)	0.465	166.587	148.394
wt_uascdc42	wt_uascdc429547	wt_uascdc4215.lsm (cropped)	1.36	166.602	113.063
wt_uascdc42	wt_uascdc429548	wt_uascdc4215.lsm (cropped)	0.887	164.855	109.671
wt_uascdc42	wt_uascdc429550	wt_uascdc4215.lsm (cropped)	0.676	158.15	107.974
wt_uascdc42	wt_uascdc429551	wt_uascdc4215.lsm (cropped)	0.438	161.237	107.308
wt_uascdc42	wt_uascdc429552	wt_uascdc4215.lsm (cropped)	0.535	154.087	115.402
wt_uascdc42	wt_uascdc429553	wt_uascdc4215.lsm (cropped)	0.319	157.169	110.188
wt_uascdc42	wt_uascdc429555	wt_uascdc4215.lsm (cropped)	1.04	159.115	103.1
wt_uascdc42	wt_uascdc429556	wt_uascdc4215.lsm (cropped)	0.378	159.138	105.002
wt_uascdc42	wt_uascdc429557	wt_uascdc4215.lsm (cropped)	1.36	160.741	111.792
wt_uascdc42	wt_uascdc429558	wt_uascdc4215.lsm (cropped)	1.61	170.155	110.573
wt_uascdc42	wt_uascdc429560	wt_uascdc4215.lsm (cropped)	2.03	174.274	109.284
wt_uascdc42	wt_uascdc429561	wt_uascdc4215.lsm (cropped)	1.48	171.231	212.504
wt_uascdc42	wt_uascdc429562	wt_uascdc4215.lsm (cropped)	0.557	169.941	111.334
wt_uascdc42	wt_uascdc429563	wt_uascdc4215.lsm (cropped)	0.433	157.557	107.113
wt_uascdc42	wt_uascdc429564	wt_uascdc4215.lsm (cropped)	0.606	156.264	106.696
wt_uascdc42	wt_uascdc429565	wt_uascdc4215.lsm (cropped)	0.454	158.635	113.808
wt_uascdc42	wt_uascdc429566	wt_uascdc4215.lsm (cropped)	0.33	155.741	111.19
wt_uascdc42	wt_uascdc429567	wt_uascdc4215.lsm (cropped)	1.92	159.438	105.502
wt_uascdc42	wt_uascdc429568	wt_uascdc4215.lsm (cropped)	0.227	147.179	90.9796
wt_uascdc42	wt_uascdc429569	wt_uascdc4215.lsm (cropped)	5.06	174.184	108.5
wt_uascdc42	wt_uascdc429571	wt_uascdc4215.lsm (cropped)	2.58	174.745	108.525
wt_uascdc42	wt_uascdc429572	wt_uascdc4215.lsm (cropped)	1.92	174.837	117.221
wt_uascdc42	wt_uascdc429573	wt_uascdc4215.lsm (cropped)	7.07	180.764	114.019
wt_uascdc42	wt_uascdc429574	wt_uascdc4215.lsm (cropped)	3.76	176.577	118.678
wt_uascdc42	wt_uascdc429575	wt_uascdc4215.lsm (cropped)	1.12	170.23	110.931
wt_uascdc42	wt_uascdc429576	wt_uascdc4215.lsm (cropped)	0.746	179.684	118.062
wt_uascdc42	wt_uascdc429577	wt_uascdc4215.lsm (cropped)	1.35	183.074	123.925
wt_uascdc42	wt_uascdc429581	wt_uascdc4215.lsm (cropped)	2.58	188.132	124.315
wt_uascdc42	wt_uascdc429582	wt_uascdc4215.lsm (cropped)	1.73	167.192	107.998
wt_uascdc42	wt_uascdc429583	wt_uascdc4215.lsm (cropped)	2.46	164.597	108.344
wt_uascdc42	wt_uascdc429584	wt_uascdc4215.lsm (cropped)	3.19	166.451	106.574
wt_uascdc42	wt_uascdc429586	wt_uascdc4215.lsm (cropped)	0.703	157.915	102.029
wt_uascdc42	wt_uascdc429587	wt_uascdc4215.lsm (cropped)	1.16	165.359	105.424
wt_uascdc42	wt_uascdc429588	wt_uascdc4215.lsm (cropped)	4.95	179.966	114.414
wt_uascdc42	wt_uascdc429589	wt_uascdc4215.lsm (cropped)	4.28	185.223	114
wt_uascdc42	wt_uascdc429590	wt_uascdc4215.lsm (cropped)	0.676	161.778	108.781
wt_uascdc42	wt_uascdc429591	wt_uascdc4215.lsm (cropped)	0.508	157.028	148.222
wt_uascdc42	wt_uascdc429592	wt_uascdc4215.lsm (cropped)	0.73	156.389	110.819
wt_uascdc42	wt_uascdc429593	wt_uascdc4215.lsm (cropped)	0.497	161.025	107.918
wt_uascdc42	wt_uascdc429594	wt_uascdc4215.lsm (cropped)	1.42	161.114	109.935
wt_uascdc42	wt_uascdc429595	wt_uascdc4215.lsm (cropped)	0.703	160.572	108.899
wt_uascdc42	wt_uascdc429596	wt_uascdc4215.lsm (cropped)	2.11	157.521	105.873
wt_uascdc42	wt_uascdc429597	wt_uascdc4215.lsm (cropped)	2.95	161.872	114.604
wt_uascdc42	wt_uascdc429598	wt_uascdc4215.lsm (cropped)	6.46	170.781	105.285
wt_uascdc42	wt_uascdc429599	wt_uascdc4215.lsm (cropped)	1.39	175.366	118.964
wt_uascdc42	wt_uascdc429600	wt_uascdc4215.lsm (cropped)	0.919	159.776	113.129
wt_uascdc42	wt_uascdc429601	wt_uascdc4215.lsm (cropped)	1.15	172.322	108.709
wt_uascdc42	wt_uascdc429602	wt_uascdc4215.lsm (cropped)	0.697	154.325	113.965
wt_uascdc42	wt_uascdc429603	wt_uascdc4215.lsm (cropped)	0.681	156.653	111.797
wt_uascdc42	wt_uascdc429606	wt_uascdc4215.lsm (cropped)	4	181.503	113.061
wt_uascdc42	wt_uascdc429607	wt_uascdc4215.lsm (cropped)	3.24	171.501	112.172
wt_uascdc42	wt_uascdc429608	wt_uascdc4215.lsm (cropped)	0.487	154.03	102.74
wt_uascdc42	wt_uascdc429609	wt_uascdc4215.lsm (cropped)	6.6	172.489	110.236
wt_uascdc42	wt_uascdc429612	wt_uascdc4215.lsm (cropped)	1.83	162.995	122.93
wt_uascdc42	wt_uascdc429613	wt_uascdc4215.lsm (cropped)	3.51	175.954	105.053
wt_uascdc42	wt_uascdc429616	wt_uascdc4215.lsm (cropped)	1.67	156.167	93.791
wt_uascdc42	wt_uascdc429619	wt_uascdc4215.lsm (cropped)	1.38	167.225	112.963
wt_uascdc42	wt_uascdc429620	wt_uascdc4215.lsm (cropped)	0.692	165.327	109.702
wt_uascdc42	wt_uascdc429622	wt_uascdc4215.lsm (cropped)	0.681	159.105	104.898
wt_uascdc42	wt_uascdc429623	wt_uascdc4215.lsm (cropped)	1.16	173.318	118.671
wt_uascdc42	wt_uascdc429624	wt_uascdc4215.lsm (cropped)	0.849	162.733	104.693
wt_uascdc42	wt_uascdc429625	wt_uascdc4215.lsm (cropped)	1.11	165.419	109.024
wt_uascdc42	wt_uascdc429627	wt_uascdc4215.lsm (cropped)	0.687	164.028	101.863
wt_uascdc42	wt_uascdc429628	wt_uascdc4215.lsm (cropped)	0.551	152.374	104.583
wt_uascdc42	wt_uascdc429631	wt_uascdc4215.lsm (cropped)	0.854	162.428	103.182
wt_uascdc42	wt_uascdc429632	wt_uascdc4215.lsm (cropped)	3.27	162.468	99.0332
wt_uascdc42	wt_uascdc429633	wt_uascdc4215.lsm (cropped)	1.31	163.109	107.735
wt_uascdc42	wt_uascdc429634	wt_uascdc4215.lsm (cropped)	3.4	179.785	103.006
wt_uascdc42	wt_uascdc429635	wt_uascdc4215.lsm (cropped)	1.75	155.087	104.673
wt_uascdc42	wt_uascdc429636	wt_uascdc4215.lsm (cropped)	2.88	188.069	118.037
wt_uascdc42	wt_uascdc429637	wt_uascdc4215.lsm (cropped)	2.08	196.687	126.766
wt_uascdc42	wt_uascdc429638	wt_uascdc4215.lsm (cropped)	0.865	157.699	104.739
wt_uascdc42	wt_uascdc429639	wt_uascdc4215.lsm (cropped)	3	185.181	125.896
wt_uascdc42	wt_uascdc429640	wt_uascdc4215.lsm (cropped)	0.514	158.218	108.888
wt_uascdc42	wt_uascdc429641	wt_uascdc4215.lsm (cropped)	0.697	164.946	107.718
wt_uascdc42	wt_uascdc429642	wt_uascdc4215.lsm (cropped)	0.941	168.488	113.109
wt_uascdc42	wt_uascdc429643	wt_uascdc4215.lsm (cropped)	0.757	159.981	103.198
wt_uascdc42	wt_uascdc429644	wt_uascdc4215.lsm (cropped)	2.74	187.69	134.519
wt_uascdc42	wt_uascdc429646	wt_uascdc4215.lsm (cropped)	1.02	162.841	107.685
wt_uascdc42	wt_uascdc429647	wt_uascdc4215.lsm (cropped)	1.03	163.699	103.647
wt_uascdc42	wt_uascdc429648	wt_uascdc4215.lsm (cropped)	0.957	152.663	104.336
wt_uascdc42	wt_uascdc429649	wt_uascdc4215.lsm (cropped)	1.55	158.576	98.6515
wt_uascdc42	wt_uascdc429651	wt_uascdc4215.lsm (cropped)	0.481	159.32	105.483
wt_uascdc42	wt_uascdc429656	wt_uascdc4215.lsm (cropped)	3.11	167.376	100.506
wt_uascdc42	wt_uascdc429658	wt_uascdc4215.lsm (cropped)	0.416	150.702	131.162
wt_uascdc42	wt_uascdc429660	wt_uascdc4215.lsm (cropped)	5.04	174.167	99.7876
wt_uascdc42	wt_uascdc429661	wt_uascdc4215.lsm (cropped)	1.57	157.529	101.776
wt_uascdc42	wt_uascdc429662	wt_uascdc4215.lsm (cropped)	2.31	165.939	102.336
wt_uascdc42	wt_uascdc429663	wt_uascdc4215.lsm (cropped)	3.35	181.276	117.337
wt_uascdc42	wt_uascdc429664	wt_uascdc4215.lsm (cropped)	4.04	172.114	117.242
wt_uascdc42	wt_uascdc429665	wt_uascdc4215.lsm (cropped)	1.78	191.629	127.407
wt_uascdc42	wt_uascdc429666	wt_uascdc4215.lsm (cropped)	1.8	169.069	111.246
wt_uascdc42	wt_uascdc429667	wt_uascdc4215.lsm (cropped)	2.25	180.072	124.125
wt_uascdc42	wt_uascdc429669	wt_uascdc4215.lsm (cropped)	0.308	162.593	107.191
wt_uascdc42	wt_uascdc429670	wt_uascdc4215.lsm (cropped)	0.816	161.086	102.772
wt_uascdc42	wt_uascdc429672	wt_uascdc4215.lsm (cropped)	0.351	156.946	113.336
wt_uascdc42	wt_uascdc429673	wt_uascdc4215.lsm (cropped)	0.887	166.939	111.633
wt_uascdc42	wt_uascdc429674	wt_uascdc4215.lsm (cropped)	0.752	157.271	101.959
wt_uascdc42	wt_uascdc429675	wt_uascdc4215.lsm (cropped)	5.06	171.389	106.57
wt_uascdc42	wt_uascdc429676	wt_uascdc4215.lsm (cropped)	0.562	160.597	117.242
wt_uascdc42	wt_uascdc429677	wt_uascdc4215.lsm (cropped)	1	164.955	112.948
wt_uascdc42	wt_uascdc429678	wt_uascdc4215.lsm (cropped)	2.27	160.49	109.083
wt_uascdc42	wt_uascdc429679	wt_uascdc4215.lsm (cropped)	1.73	160.087	114.189
wt_uascdc42	wt_uascdc429680	wt_uascdc4215.lsm (cropped)	1.43	164.898	100.687
wt_uascdc42	wt_uascdc429681	wt_uascdc4215.lsm (cropped)	0.606	158.695	103.611
wt_uascdc42	wt_uascdc429682	wt_uascdc4215.lsm (cropped)	2.49	160.615	105.807
wt_uascdc42	wt_uascdc429686	wt_uascdc4215.lsm (cropped)	2.09	165.913	100.539
wt_uascdc42	wt_uascdc429687	wt_uascdc4215.lsm (cropped)	1.16	166.024	101.751
wt_uascdc42	wt_uascdc429688	wt_uascdc4215.lsm (cropped)	1.05	165.122	105.956
wt_uascdc42	wt_uascdc429691	wt_uascdc4215.lsm (cropped)	0.789	153.662	145.984
wt_uascdc42	wt_uascdc429692	wt_uascdc4215.lsm (cropped)	5.55	164.985	103.881
wt_uascdc42	wt_uascdc429693	wt_uascdc4215.lsm (cropped)	1.15	156.838	99.1772
wt_uascdc42	wt_uascdc429696	wt_uascdc4215.lsm (cropped)	2.96	167.843	102.32
wt_uascdc42	wt_uascdc429697	wt_uascdc4215.lsm (cropped)	16.89	189.933	121.979
wt_uascdc42	wt_uascdc429698	wt_uascdc4215.lsm (cropped)	2.15	201.36	131.604
wt_uascdc42	wt_uascdc429700	wt_uascdc4215.lsm (cropped)	1.66	161.215	112.941
wt_uascdc42	wt_uascdc429702	wt_uascdc4215.lsm (cropped)	1.23	171.289	106.279
wt_uascdc42	wt_uascdc429706	wt_uascdc4215.lsm (cropped)	0.546	155.289	99.8983
wt_uascdc42	wt_uascdc429707	wt_uascdc4215.lsm (cropped)	0.47	162.904	100.98
wt_uascdc42	wt_uascdc429708	wt_uascdc4215.lsm (cropped)	0.914	156.508	98.055
wt_uascdc42	wt_uascdc429709	wt_uascdc4215.lsm (cropped)	2.75	166.999	104.511
wt_uascdc42	wt_uascdc429710	wt_uascdc4215.lsm (cropped)	2.4	168.833	99.4051
wt_uascdc42	wt_uascdc429711	wt_uascdc4215.lsm (cropped)	0.606	153.2	99.5286
wt_uascdc42	wt_uascdc429712	wt_uascdc4215.lsm (cropped)	3.46	167.66	102.536
wt_uascdc42	wt_uascdc429713	wt_uascdc4215.lsm (cropped)	4.59	166.442	101.003
wt_uascdc42	wt_uascdc429715	wt_uascdc4215.lsm (cropped)	0.438	161.271	103.769
wt_uascdc42	wt_uascdc429716	wt_uascdc4215.lsm (cropped)	0.762	154.872	186.386
wt_uascdc42	wt_uascdc429720	wt_uascdc4215.lsm (cropped)	0.454	158.36	100.898
wt_uascdc42	wt_uascdc429722	wt_uascdc4215.lsm (cropped)	0.93	159.812	110.24
wt_uascdc42	wt_uascdc429723	wt_uascdc4215.lsm (cropped)	1.54	172.642	116.69
wt_uascdc42	wt_uascdc429724	wt_uascdc4215.lsm (cropped)	0.935	158.478	109.194
wt_uascdc42	wt_uascdc429725	wt_uascdc4215.lsm (cropped)	3.92	179.229	125.1
wt_uascdc42	wt_uascdc429726	wt_uascdc4215.lsm (cropped)	0.362	155.862	112.603
wt_uascdc42	wt_uascdc429727	wt_uascdc4215.lsm (cropped)	0.535	170.347	110.422
wt_uascdc42	wt_uascdc429728	wt_uascdc4215.lsm (cropped)	1.21	157.988	123.257
wt_uascdc42	wt_uascdc429729	wt_uascdc4215.lsm (cropped)	5.23	176.265	113.03
wt_uascdc42	wt_uascdc429731	wt_uascdc4215.lsm (cropped)	8.36	178.332	116.795
wt_uascdc42	wt_uascdc429732	wt_uascdc4215.lsm (cropped)	1.9	167.506	111.03
wt_uascdc42	wt_uascdc429733	wt_uascdc4215.lsm (cropped)	3.42	157.652	96.3956
wt_uascdc42	wt_uascdc429734	wt_uascdc4215.lsm (cropped)	0.746	158.461	101.259
wt_uascdc42	wt_uascdc429735	wt_uascdc4215.lsm (cropped)	0.697	155.231	98.8691
wt_uascdc42	wt_uascdc429736	wt_uascdc4215.lsm (cropped)	1.24	158.917	103.536
wt_uascdc42	wt_uascdc429737	wt_uascdc4215.lsm (cropped)	2.35	158.804	98.8105
wt_uascdc42	wt_uascdc429738	wt_uascdc4215.lsm (cropped)	4.26	199.558	129.466
wt_uascdc42	wt_uascdc429739	wt_uascdc4215.lsm (cropped)	4.04	196.349	121.365
wt_uascdc42	wt_uascdc429740	wt_uascdc4215.lsm (cropped)	0.579	151.631	121.383
wt_uascdc42	wt_uascdc429741	wt_uascdc4215.lsm (cropped)	0.422	157.335	106.701
wt_uascdc42	wt_uascdc429747	wt_uascdc4215.lsm (cropped)	2.84	168.97	110.479
wt_uascdc42	wt_uascdc429748	wt_uascdc4215.lsm (cropped)	2.87	166.586	109.949
wt_uascdc42	wt_uascdc429749	wt_uascdc4215.lsm (cropped)	1.73	158.155	93.12
wt_uascdc42	wt_uascdc429750	wt_uascdc4215.lsm (cropped)	2.13	159.61	105.936
wt_uascdc42	wt_uascdc429751	wt_uascdc4215.lsm (cropped)	0.433	152.722	105.65
wt_uascdc42	wt_uascdc429752	wt_uascdc4215.lsm (cropped)	1.01	153.863	102.918
wt_uascdc42	wt_uascdc429753	wt_uascdc4215.lsm (cropped)	5.4	165.558	104.637
wt_uascdc42	wt_uascdc429754	wt_uascdc4215.lsm (cropped)	2.2	156.435	110.758
wt_uascdc42	wt_uascdc429755	wt_uascdc4215.lsm (cropped)	3.86	179.698	134.914
wt_uascdc42	wt_uascdc429756	wt_uascdc4215.lsm (cropped)	0.681	155.37	98.0414
wt_uascdc42	wt_uascdc429757	wt_uascdc4215.lsm (cropped)	2.36	175.62	115.405
wt_uascdc42	wt_uascdc429758	wt_uascdc4215.lsm (cropped)	1.78	167.208	104.854
wt_uascdc42	wt_uascdc429759	wt_uascdc4215.lsm (cropped)	2.62	179.504	135.795
wt_uascdc42	wt_uascdc429761	wt_uascdc4215.lsm (cropped)	22.71	188.445	126.64
wt_uascdc42	wt_uascdc429762	wt_uascdc4215.lsm (cropped)	2.62	162.071	104.644
wt_uascdc42	wt_uascdc429763	wt_uascdc4215.lsm (cropped)	2.45	172.376	108.792
wt_uascdc42	wt_uascdc429767	wt_uascdc4215.lsm (cropped)	0.811	159.43	102.948
wt_uascdc42	wt_uascdc429768	wt_uascdc4215.lsm (cropped)	3.9	181.473	123.299
wt_uascdc42	wt_uascdc429769	wt_uascdc4215.lsm (cropped)	1.45	169.697	102.885
wt_uascdc42	wt_uascdc429770	wt_uascdc4215.lsm (cropped)	1.72	175.869	117.287
wt_uascdc42	wt_uascdc429773	wt_uascdc4215.lsm (cropped)	2.77	168.39	107.265
wt_uascdc42	wt_uascdc429774	wt_uascdc4215.lsm (cropped)	0.887	162.104	107.986
wt_uascdc42	wt_uascdc429775	wt_uascdc4215.lsm (cropped)	8.13	180.995	124.373
wt_uascdc42	wt_uascdc429776	wt_uascdc4215.lsm (cropped)	0.508	161.461	106.936
wt_uascdc42	wt_uascdc429777	wt_uascdc4215.lsm (cropped)	2.1	168.859	109.709
wt_uascdc42	wt_uascdc429778	wt_uascdc4215.lsm (cropped)	0.481	160.767	103.218
wt_uascdc42	wt_uascdc429780	wt_uascdc4215.lsm (cropped)	6.07	174.814	112.629
wt_uascdc42	wt_uascdc429781	wt_uascdc4215.lsm (cropped)	2.11	162.527	94.8977
wt_uascdc42	wt_uascdc429782	wt_uascdc4215.lsm (cropped)	6.16	182.201	109.126
wt_uascdc42	wt_uascdc429784	wt_uascdc4215.lsm (cropped)	2.79	169.782	108.002
wt_uascdc42	wt_uascdc429786	wt_uascdc4215.lsm (cropped)	1.44	158.153	100.792
wt_uascdc42	wt_uascdc429787	wt_uascdc4215.lsm (cropped)	0.324	151.243	149.142
wt_uascdc42	wt_uascdc429788	wt_uascdc4215.lsm (cropped)	4.3	166.708	100.479
wt_uascdc42	wt_uascdc429790	wt_uascdc4215.lsm (cropped)	2.84	163.802	108.48
wt_uascdc42	wt_uascdc429792	wt_uascdc4215.lsm (cropped)	1.3	156.376	98.4494
wt_uascdc42	wt_uascdc429793	wt_uascdc4215.lsm (cropped)	2.87	185.184	121.039
wt_uascdc42	wt_uascdc429795	wt_uascdc4215.lsm (cropped)	3.8	165.206	106.796
wt_uascdc42	wt_uascdc429796	wt_uascdc4215.lsm (cropped)	1.79	164.108	107.77
wt_uascdc42	wt_uascdc429798	wt_uascdc4215.lsm (cropped)	4.01	176.701	111.314
wt_uascdc42	wt_uascdc429799	wt_uascdc4215.lsm (cropped)	6.67	173.075	103.46
wt_uascdc42	wt_uascdc429803	wt_uascdc4215.lsm (cropped)	3.01	160.113	104.972
wt_uascdc42	wt_uascdc429804	wt_uascdc4215.lsm (cropped)	1.77	154.758	96.4668
wt_uascdc42	wt_uascdc429805	wt_uascdc4215.lsm (cropped)	10.56	179.935	109.55
wt_uascdc42	wt_uascdc429808	wt_uascdc4215.lsm (cropped)	1.32	154.452	95.3576
wt_uascdc42	wt_uascdc429811	wt_uascdc4215.lsm (cropped)	3.61	176.333	120.183
wt_uascdc42	wt_uascdc429812	wt_uascdc4215.lsm (cropped)	4.52	178.368	108.489
wt_uascdc42	wt_uascdc429813	wt_uascdc4215.lsm (cropped)	2.9	168.472	105.585
wt_uascdc42	wt_uascdc429814	wt_uascdc4215.lsm (cropped)	2.06	157.671	101.111
wt_uascdc42	wt_uascdc429815	wt_uascdc4215.lsm (cropped)	6.26	208.912	139.151
wt_uascdc42	wt_uascdc429817	wt_uascdc4215.lsm (cropped)	0.46	165.887	96.1846
wt_uascdc42	wt_uascdc429818	wt_uascdc4215.lsm (cropped)	2.77	170.505	103.994
wt_uascdc42	wt_uascdc4211645	wt_uascdc4227.lsm (cropped)	1.33	174.99	124.578
wt_uascdc42	wt_uascdc4211647	wt_uascdc4227.lsm (cropped)	1.09	191.871	124.736
wt_uascdc42	wt_uascdc4211656	wt_uascdc4227.lsm (cropped)	1.1	172.083	118.85
wt_uascdc42	wt_uascdc4211678	wt_uascdc4227.lsm (cropped)	0.27	154.526	219.753
wt_uascdc42	wt_uascdc4211680	wt_uascdc4227.lsm (cropped)	1.18	167.412	140.024
wt_uascdc42	wt_uascdc4211681	wt_uascdc4227.lsm (cropped)	2.24	168.284	199.012
wt_uascdc42	wt_uascdc4211684	wt_uascdc4227.lsm (cropped)	0.811	158.978	194.491
wt_uascdc42	wt_uascdc4211685	wt_uascdc4227.lsm (cropped)	3.11	168.152	174.753
wt_uascdc42	wt_uascdc4211693	wt_uascdc4227.lsm (cropped)	0.395	161.22	130.658
wt_uascdc42	wt_uascdc4211697	wt_uascdc4227.lsm (cropped)	2.97	196.012	132.27
wt_uascdc42	wt_uascdc4211701	wt_uascdc4227.lsm (cropped)	0.254	157.286	108.595
wt_uascdc42	wt_uascdc4211708	wt_uascdc4227.lsm (cropped)	3.58	178.659	125.948
wt_uascdc42	wt_uascdc4211709	wt_uascdc4227.lsm (cropped)	9.65	188.802	118.603
wt_uascdc42	wt_uascdc4211716	wt_uascdc4227.lsm (cropped)	6.88	178.229	113.771
wt_uascdc42	wt_uascdc4211718	wt_uascdc4227.lsm (cropped)	3.54	172.774	114.024
wt_uascdc42	wt_uascdc4211719	wt_uascdc4227.lsm (cropped)	2.44	164.85	126.731
wt_uascdc42	wt_uascdc4211720	wt_uascdc4227.lsm (cropped)	8.43	173.848	118.137
wt_uascdc42	wt_uascdc4211724	wt_uascdc4227.lsm (cropped)	5.66	185.493	159.217
wt_uascdc42	wt_uascdc4211730	wt_uascdc4227.lsm (cropped)	4.46	168.669	117.121
wt_uascdc42	wt_uascdc4211731	wt_uascdc4227.lsm (cropped)	0.406	155.571	172.634
wt_uascdc42	wt_uascdc4211732	wt_uascdc4227.lsm (cropped)	0.508	162.3	210.36
wt_uascdc42	wt_uascdc4211733	wt_uascdc4227.lsm (cropped)	2.63	180.895	118.614
wt_uascdc42	wt_uascdc4211734	wt_uascdc4227.lsm (cropped)	0.757	155.921	109.001
wt_uascdc42	wt_uascdc4211735	wt_uascdc4227.lsm (cropped)	1.81	169.576	118.826
wt_uascdc42	wt_uascdc4211736	wt_uascdc4227.lsm (cropped)	2.06	177.043	115.359
wt_uascdc42	wt_uascdc4211739	wt_uascdc4227.lsm (cropped)	1.98	170.525	128.567
wt_uascdc42	wt_uascdc4211742	wt_uascdc4227.lsm (cropped)	2.51	174.037	201.279
wt_uascdc42	wt_uascdc4211748	wt_uascdc4227.lsm (cropped)	3.58	175.223	114.773
wt_uascdc42	wt_uascdc4211753	wt_uascdc4227.lsm (cropped)	0.222	156.603	199.109
wt_uascdc42	wt_uascdc4211756	wt_uascdc4227.lsm (cropped)	0.357	162.332	118.505
wt_uascdc42	wt_uascdc4211761	wt_uascdc4227.lsm (cropped)	7.78	187.883	120.66
wt_uascdc42	wt_uascdc4211766	wt_uascdc4227.lsm (cropped)	1.24	172.623	198.521
wt_uascdc42	wt_uascdc4211768	wt_uascdc4227.lsm (cropped)	0.492	162.969	251.054
wt_uascdc42	wt_uascdc4211770	wt_uascdc4227.lsm (cropped)	2.61	172.16	130.548
wt_uascdc42	wt_uascdc4211774	wt_uascdc4227.lsm (cropped)	2.94	177.02	130.42
wt_uascdc42	wt_uascdc4211776	wt_uascdc4227.lsm (cropped)	1.63	185.214	127.522
wt_uascdc42	wt_uascdc4211778	wt_uascdc4227.lsm (cropped)	0.249	157.564	247.664
wt_uascdc42	wt_uascdc4211780	wt_uascdc4227.lsm (cropped)	1.47	161.984	139.884
wt_uascdc42	wt_uascdc4211781	wt_uascdc4227.lsm (cropped)	3.81	176.446	130.027
wt_uascdc42	wt_uascdc4211783	wt_uascdc4227.lsm (cropped)	0.627	163.421	145.538
wt_uascdc42	wt_uascdc4211785	wt_uascdc4227.lsm (cropped)	2.92	185.604	118.837
wt_uascdc42	wt_uascdc4211787	wt_uascdc4227.lsm (cropped)	5.88	179.012	118.973
wt_uascdc42	wt_uascdc4211797	wt_uascdc4227.lsm (cropped)	1.04	164.008	146.671
wt_uascdc42	wt_uascdc4211802	wt_uascdc4227.lsm (cropped)	3.04	185.762	119.113
wt_uascdc42	wt_uascdc4211805	wt_uascdc4227.lsm (cropped)	2.24	173.844	116.016
wt_uascdc42	wt_uascdc4211807	wt_uascdc4227.lsm (cropped)	7.78	185.936	129.365
wt_uascdc42	wt_uascdc4211809	wt_uascdc4227.lsm (cropped)	1.88	170.433	120.845
wt_uascdc42	wt_uascdc4211812	wt_uascdc4227.lsm (cropped)	2.29	162.904	159.812
wt_uascdc42	wt_uascdc4211821	wt_uascdc4227.lsm (cropped)	0.368	154.931	187.497
wt_uascdc42	wt_uascdc4211826	wt_uascdc4227.lsm (cropped)	0.865	165.825	115.561
wt_uascdc42	wt_uascdc4211827	wt_uascdc4227.lsm (cropped)	0.351	154.664	206.185
wt_uascdc42	wt_uascdc4211828	wt_uascdc4227.lsm (cropped)	3.76	169.406	172.826
wt_uascdc42	wt_uascdc4211829	wt_uascdc4227.lsm (cropped)	1.4	162.715	150.771
wt_uascdc42	wt_uascdc4211833	wt_uascdc4227.lsm (cropped)	3.15	179.36	111.884
wt_uascdc42	wt_uascdc4211849	wt_uascdc4227.lsm (cropped)	0.254	154.825	248.169
wt_uascdc42	wt_uascdc4211853	wt_uascdc4227.lsm (cropped)	0.249	157.796	229.309
wt_uascdc42	wt_uascdc4211862	wt_uascdc4227.lsm (cropped)	0.925	166.762	138.961
wt_uascdc42	wt_uascdc4211863	wt_uascdc4227.lsm (cropped)	0.406	159.432	113.799
wt_uascdc42	wt_uascdc4211864	wt_uascdc4227.lsm (cropped)	3.17	162.667	130.36
wt_uascdc42	wt_uascdc4211865	wt_uascdc4227.lsm (cropped)	2.37	164.13	168.11
wt_uascdc42	wt_uascdc4211867	wt_uascdc4227.lsm (cropped)	4.81	164.88	179.954
wt_uascdc42	wt_uascdc4211868	wt_uascdc4227.lsm (cropped)	3.15	169.483	128.91
wt_uascdc42	wt_uascdc4211869	wt_uascdc4227.lsm (cropped)	0.822	160.865	193.689
wt_uascdc42	wt_uascdc4211873	wt_uascdc4227.lsm (cropped)	0.595	159.685	205.53
wt_uascdc42	wt_uascdc4211875	wt_uascdc4227.lsm (cropped)	0.822	170.81	213.118
wt_uascdc42	wt_uascdc4211877	wt_uascdc4227.lsm (cropped)	0.341	155.253	211.679
wt_uascdc42	wt_uascdc4211883	wt_uascdc4227.lsm (cropped)	1.81	174.196	117.052
wt_uascdc42	wt_uascdc4211885	wt_uascdc4227.lsm (cropped)	3.65	180.208	112.138
wt_uascdc42	wt_uascdc4211887	wt_uascdc4227.lsm (cropped)	0.962	171.012	152.661
wt_uascdc42	wt_uascdc4211889	wt_uascdc4227.lsm (cropped)	1.04	164.983	153.103
wt_uascdc42	wt_uascdc4211892	wt_uascdc4227.lsm (cropped)	1.46	176.795	117.617
wt_uascdc42	wt_uascdc4211893	wt_uascdc4227.lsm (cropped)	3.1	189.238	121.449
wt_uascdc42	wt_uascdc4211894	wt_uascdc4227.lsm (cropped)	2.05	178.128	120.523
wt_uascdc42	wt_uascdc4211895	wt_uascdc4227.lsm (cropped)	4.24	185.708	130.577
wt_uascdc42	wt_uascdc4211897	wt_uascdc4227.lsm (cropped)	0.216	162.853	154.563
wt_uascdc42	wt_uascdc4211898	wt_uascdc4227.lsm (cropped)	9.91	187.516	162.635
wt_uascdc42	wt_uascdc4211900	wt_uascdc4227.lsm (cropped)	2.05	174.114	121.961
wt_uascdc42	wt_uascdc4211903	wt_uascdc4227.lsm (cropped)	7.26	179.181	166.361
wt_uascdc42	wt_uascdc4211906	wt_uascdc4227.lsm (cropped)	1.21	159.254	119.162
wt_uascdc42	wt_uascdc4211908	wt_uascdc4227.lsm (cropped)	4.68	170.223	124.022
wt_uascdc42	wt_uascdc4211909	wt_uascdc4227.lsm (cropped)	6.19	177.262	118.782
wt_uascdc42	wt_uascdc4211912	wt_uascdc4227.lsm (cropped)	2.36	159.326	217.76
wt_uascdc42	wt_uascdc4211913	wt_uascdc4227.lsm (cropped)	2.67	173.595	152.015
wt_uascdc42	wt_uascdc4211914	wt_uascdc4227.lsm (cropped)	1.18	161.05	133.894
wt_uascdc42	wt_uascdc4211919	wt_uascdc4227.lsm (cropped)	10.31	189.206	143.129
wt_uascdc42	wt_uascdc4211922	wt_uascdc4227.lsm (cropped)	2.65	169.634	128.323
wt_uascdc42	wt_uascdc4211923	wt_uascdc4227.lsm (cropped)	10.32	177.151	132.355
wt_uascdc42	wt_uascdc4211927	wt_uascdc4227.lsm (cropped)	0.216	155.708	120.946
wt_uascdc42	wt_uascdc4211930	wt_uascdc4227.lsm (cropped)	5.01	174.077	115.356
wt_uascdc42	wt_uascdc4211931	wt_uascdc4227.lsm (cropped)	7.15	182.888	122.674
wt_uascdc42	wt_uascdc4211932	wt_uascdc4227.lsm (cropped)	2.86	170.785	187.324
wt_uascdc42	wt_uascdc4211935	wt_uascdc4227.lsm (cropped)	0.422	163.547	133.626
wt_uascdc42	wt_uascdc4211942	wt_uascdc4227.lsm (cropped)	3.76	183.131	152.865
wt_uascdc42	wt_uascdc4211950	wt_uascdc4227.lsm (cropped)	1.81	175.386	113.523
wt_uascdc42	wt_uascdc4211952	wt_uascdc4227.lsm (cropped)	3.54	175.385	144.451
wt_uascdc42	wt_uascdc4211954	wt_uascdc4227.lsm (cropped)	0.611	163.782	184.478
wt_uascdc42	wt_uascdc4211955	wt_uascdc4227.lsm (cropped)	7.3	202.299	126.295
wt_uascdc42	wt_uascdc4213738	wt_uascdc4228.lsm (cropped)	1.71	182.83	180.034
wt_uascdc42	wt_uascdc4213739	wt_uascdc4228.lsm (cropped)	0.995	194.273	155.805
wt_uascdc42	wt_uascdc4213741	wt_uascdc4228.lsm (cropped)	1.59	179.901	161.284
wt_uascdc42	wt_uascdc4213742	wt_uascdc4228.lsm (cropped)	0.595	180.937	146.893
wt_uascdc42	wt_uascdc4213743	wt_uascdc4228.lsm (cropped)	2.11	177.83	134.726
wt_uascdc42	wt_uascdc4213745	wt_uascdc4228.lsm (cropped)	0.562	173.281	142.322
wt_uascdc42	wt_uascdc4213746	wt_uascdc4228.lsm (cropped)	0.324	165.046	160.499
wt_uascdc42	wt_uascdc4213747	wt_uascdc4228.lsm (cropped)	2.36	208.62	180.471
wt_uascdc42	wt_uascdc4213748	wt_uascdc4228.lsm (cropped)	0.741	191.358	157.81
wt_uascdc42	wt_uascdc4213749	wt_uascdc4228.lsm (cropped)	0.93	182.252	158.8
wt_uascdc42	wt_uascdc4213750	wt_uascdc4228.lsm (cropped)	2.82	197.16	160.399
wt_uascdc42	wt_uascdc4213754	wt_uascdc4228.lsm (cropped)	0.308	182.288	161.436
wt_uascdc42	wt_uascdc4213755	wt_uascdc4228.lsm (cropped)	0.649	170.301	160.631
wt_uascdc42	wt_uascdc4213757	wt_uascdc4228.lsm (cropped)	0.438	170.414	137.032
wt_uascdc42	wt_uascdc4213758	wt_uascdc4228.lsm (cropped)	0.389	175.543	141.127
wt_uascdc42	wt_uascdc4213759	wt_uascdc4228.lsm (cropped)	0.806	175.079	169.703
wt_uascdc42	wt_uascdc4213760	wt_uascdc4228.lsm (cropped)	1.45	170.26	164.713
wt_uascdc42	wt_uascdc4213761	wt_uascdc4228.lsm (cropped)	4.87	195.997	159.386
wt_uascdc42	wt_uascdc4213762	wt_uascdc4228.lsm (cropped)	0.676	165.698	145.475
wt_uascdc42	wt_uascdc4213763	wt_uascdc4228.lsm (cropped)	0.957	175.584	145.076
wt_uascdc42	wt_uascdc4213764	wt_uascdc4228.lsm (cropped)	1.05	169.895	140.977
wt_uascdc42	wt_uascdc4213765	wt_uascdc4228.lsm (cropped)	1.34	175.985	169.617
wt_uascdc42	wt_uascdc4213766	wt_uascdc4228.lsm (cropped)	0.697	171.492	138.933
wt_uascdc42	wt_uascdc4213767	wt_uascdc4228.lsm (cropped)	0.627	174.572	154.88
wt_uascdc42	wt_uascdc4213768	wt_uascdc4228.lsm (cropped)	0.6	165.651	160.005
wt_uascdc42	wt_uascdc4213769	wt_uascdc4228.lsm (cropped)	1.14	179.819	141.1
wt_uascdc42	wt_uascdc4213770	wt_uascdc4228.lsm (cropped)	0.811	172.334	165.243
wt_uascdc42	wt_uascdc4213771	wt_uascdc4228.lsm (cropped)	0.562	186.416	179.535
wt_uascdc42	wt_uascdc4213772	wt_uascdc4228.lsm (cropped)	1.14	169.955	139.722
wt_uascdc42	wt_uascdc4213773	wt_uascdc4228.lsm (cropped)	0.503	173.942	198.304
wt_uascdc42	wt_uascdc4213774	wt_uascdc4228.lsm (cropped)	0.708	175.98	156.983
wt_uascdc42	wt_uascdc4213775	wt_uascdc4228.lsm (cropped)	3.25	187.894	154.493
wt_uascdc42	wt_uascdc4213776	wt_uascdc4228.lsm (cropped)	0.292	162.515	147.19
wt_uascdc42	wt_uascdc4213778	wt_uascdc4228.lsm (cropped)	3.11	178.626	150.398
wt_uascdc42	wt_uascdc4213780	wt_uascdc4228.lsm (cropped)	4.09	198.114	169.254
wt_uascdc42	wt_uascdc4213781	wt_uascdc4228.lsm (cropped)	0.546	172.164	147.748
wt_uascdc42	wt_uascdc4213782	wt_uascdc4228.lsm (cropped)	0.514	164.508	136.474
wt_uascdc42	wt_uascdc4213783	wt_uascdc4228.lsm (cropped)	0.297	166.712	141.082
wt_uascdc42	wt_uascdc4213784	wt_uascdc4228.lsm (cropped)	1.07	176.81	140.843
wt_uascdc42	wt_uascdc4213785	wt_uascdc4228.lsm (cropped)	1.71	175.893	165.486
wt_uascdc42	wt_uascdc4213786	wt_uascdc4228.lsm (cropped)	0.724	170.134	157.023
wt_uascdc42	wt_uascdc4213787	wt_uascdc4228.lsm (cropped)	0.568	168.467	176.492
wt_uascdc42	wt_uascdc4213788	wt_uascdc4228.lsm (cropped)	0.865	177.478	132.073
wt_uascdc42	wt_uascdc4213790	wt_uascdc4228.lsm (cropped)	0.384	167.548	159.381
wt_uascdc42	wt_uascdc4213791	wt_uascdc4228.lsm (cropped)	0.503	174.076	147.432
wt_uascdc42	wt_uascdc4213792	wt_uascdc4228.lsm (cropped)	2.24	182.321	167.088
wt_uascdc42	wt_uascdc4213793	wt_uascdc4228.lsm (cropped)	0.2	163.993	145.493
wt_uascdc42	wt_uascdc4213794	wt_uascdc4228.lsm (cropped)	0.681	171.671	141.119
wt_uascdc42	wt_uascdc4213795	wt_uascdc4228.lsm (cropped)	0.341	167.994	150.893
wt_uascdc42	wt_uascdc4213797	wt_uascdc4228.lsm (cropped)	3.77	178.124	170.035
wt_uascdc42	wt_uascdc4213799	wt_uascdc4228.lsm (cropped)	0.914	188.101	152.416
wt_uascdc42	wt_uascdc4213800	wt_uascdc4228.lsm (cropped)	0.427	163.972	142.797
wt_uascdc42	wt_uascdc4213802	wt_uascdc4228.lsm (cropped)	1.83	173.647	156.202
wt_uascdc42	wt_uascdc4213803	wt_uascdc4228.lsm (cropped)	1.94	172.413	180.101
wt_uascdc42	wt_uascdc4213804	wt_uascdc4228.lsm (cropped)	3.03	183.403	160.414
wt_uascdc42	wt_uascdc4213805	wt_uascdc4228.lsm (cropped)	2.1	175.25	161.798
wt_uascdc42	wt_uascdc4213806	wt_uascdc4228.lsm (cropped)	2.76	176.709	148.353
wt_uascdc42	wt_uascdc4213807	wt_uascdc4228.lsm (cropped)	3.19	175.177	145.779
wt_uascdc42	wt_uascdc4213808	wt_uascdc4228.lsm (cropped)	3.07	183.126	139.208
wt_uascdc42	wt_uascdc4213809	wt_uascdc4228.lsm (cropped)	0.411	172.634	153.089
wt_uascdc42	wt_uascdc4213810	wt_uascdc4228.lsm (cropped)	4.04	191.67	151.371
wt_uascdc42	wt_uascdc4213811	wt_uascdc4228.lsm (cropped)	1.88	173.513	146.347
wt_uascdc42	wt_uascdc4213812	wt_uascdc4228.lsm (cropped)	3.22	179.536	146.037
wt_uascdc42	wt_uascdc4213813	wt_uascdc4228.lsm (cropped)	0.222	163.433	200.688
wt_uascdc42	wt_uascdc4213814	wt_uascdc4228.lsm (cropped)	0.887	178.228	148.851
wt_uascdc42	wt_uascdc4213815	wt_uascdc4228.lsm (cropped)	0.324	166.301	148.789
wt_uascdc42	wt_uascdc4213816	wt_uascdc4228.lsm (cropped)	1.04	165.851	205.873
wt_uascdc42	wt_uascdc4213819	wt_uascdc4228.lsm (cropped)	0.843	184.891	138.459
wt_uascdc42	wt_uascdc4213820	wt_uascdc4228.lsm (cropped)	0.416	169.917	175.2
wt_uascdc42	wt_uascdc4213821	wt_uascdc4228.lsm (cropped)	1	170.81	142.662
wt_uascdc42	wt_uascdc4213823	wt_uascdc4228.lsm (cropped)	0.26	163.901	144.622
wt_uascdc42	wt_uascdc4213825	wt_uascdc4228.lsm (cropped)	0.346	169.074	150.472
wt_uascdc42	wt_uascdc4213826	wt_uascdc4228.lsm (cropped)	0.427	170.068	145.94
wt_uascdc42	wt_uascdc4213827	wt_uascdc4228.lsm (cropped)	0.741	193.107	136.662
wt_uascdc42	wt_uascdc4213829	wt_uascdc4228.lsm (cropped)	0.643	173.993	140.595
wt_uascdc42	wt_uascdc4213830	wt_uascdc4228.lsm (cropped)	0.368	163.214	142.72
wt_uascdc42	wt_uascdc4213833	wt_uascdc4228.lsm (cropped)	0.314	164.602	146.072
wt_uascdc42	wt_uascdc4213834	wt_uascdc4228.lsm (cropped)	0.573	169.82	157.793
wt_uascdc42	wt_uascdc4213835	wt_uascdc4228.lsm (cropped)	4.1	173.754	167.659
wt_uascdc42	wt_uascdc4213837	wt_uascdc4228.lsm (cropped)	4.21	176.522	165.315
wt_uascdc42	wt_uascdc4213838	wt_uascdc4228.lsm (cropped)	0.611	173.48	138.199
wt_uascdc42	wt_uascdc4213839	wt_uascdc4228.lsm (cropped)	0.26	165.18	167.752
wt_uascdc42	wt_uascdc4213840	wt_uascdc4228.lsm (cropped)	0.692	166.373	136.188
wt_uascdc42	wt_uascdc4213841	wt_uascdc4228.lsm (cropped)	0.227	172.35	135.425
wt_uascdc42	wt_uascdc4213843	wt_uascdc4228.lsm (cropped)	0.557	175.021	144.96
wt_uascdc42	wt_uascdc4213844	wt_uascdc4228.lsm (cropped)	0.773	161.959	128.009
wt_uascdc42	wt_uascdc4213848	wt_uascdc4228.lsm (cropped)	0.606	171.102	137.47
wt_uascdc42	wt_uascdc4213851	wt_uascdc4228.lsm (cropped)	0.611	182.146	158.184
wt_uascdc42	wt_uascdc4213853	wt_uascdc4228.lsm (cropped)	1.02	177.933	125.375
wt_uascdc42	wt_uascdc4213854	wt_uascdc4228.lsm (cropped)	1.12	175.682	154.342
wt_uascdc42	wt_uascdc4213855	wt_uascdc4228.lsm (cropped)	0.378	165.665	149.055
wt_uascdc42	wt_uascdc4213856	wt_uascdc4228.lsm (cropped)	1.17	168.238	149.111
wt_uascdc42	wt_uascdc4213857	wt_uascdc4228.lsm (cropped)	3.14	198.564	173.988
wt_uascdc42	wt_uascdc4213858	wt_uascdc4228.lsm (cropped)	2.59	173.834	151.337
wt_uascdc42	wt_uascdc4213860	wt_uascdc4228.lsm (cropped)	1.18	163.414	137.748
wt_uascdc42	wt_uascdc4213862	wt_uascdc4228.lsm (cropped)	1.03	176.981	149.561
wt_uascdc42	wt_uascdc4213864	wt_uascdc4228.lsm (cropped)	0.773	174.194	146.122
wt_uascdc42	wt_uascdc4213865	wt_uascdc4228.lsm (cropped)	0.589	174.518	153.727
wt_uascdc42	wt_uascdc4213867	wt_uascdc4228.lsm (cropped)	0.422	176.885	153.152
wt_uascdc42	wt_uascdc4213868	wt_uascdc4228.lsm (cropped)	0.843	174.65	161.289
wt_uascdc42	wt_uascdc4213869	wt_uascdc4228.lsm (cropped)	0.892	162.609	134.494
wt_uascdc42	wt_uascdc4213872	wt_uascdc4228.lsm (cropped)	2.52	199.859	154.729
wt_uascdc42	wt_uascdc4213873	wt_uascdc4228.lsm (cropped)	3.1	202.649	168.214
wt_uascdc42	wt_uascdc4213874	wt_uascdc4228.lsm (cropped)	0.989	183.837	161.19
wt_uascdc42	wt_uascdc4213875	wt_uascdc4228.lsm (cropped)	0.395	181.869	142.171
wt_uascdc42	wt_uascdc4213876	wt_uascdc4228.lsm (cropped)	0.881	170.591	140.336
wt_uascdc42	wt_uascdc4213877	wt_uascdc4228.lsm (cropped)	1.18	181.378	141.677
wt_uascdc42	wt_uascdc4213878	wt_uascdc4228.lsm (cropped)	0.287	171.495	160.311
wt_uascdc42	wt_uascdc4213879	wt_uascdc4228.lsm (cropped)	1.21	174.579	137.059
wt_uascdc42	wt_uascdc4213881	wt_uascdc4228.lsm (cropped)	0.232	160.361	184.412
wt_uascdc42	wt_uascdc4213882	wt_uascdc4228.lsm (cropped)	2.65	190.294	143.255
wt_uascdc42	wt_uascdc4213883	wt_uascdc4228.lsm (cropped)	0.314	165.346	141.93
wt_uascdc42	wt_uascdc4213884	wt_uascdc4228.lsm (cropped)	0.595	175.623	155.023
wt_uascdc42	wt_uascdc4213886	wt_uascdc4228.lsm (cropped)	3.1	188.886	141.863
wt_uascdc42	wt_uascdc4213888	wt_uascdc4228.lsm (cropped)	2.1	192.653	138.279
wt_uascdc42	wt_uascdc4213889	wt_uascdc4228.lsm (cropped)	0.908	188.786	148.01
wt_uascdc42	wt_uascdc4213890	wt_uascdc4228.lsm (cropped)	0.93	174.621	138.657
wt_uascdc42	wt_uascdc4213891	wt_uascdc4228.lsm (cropped)	2.23	186.554	141.583
wt_uascdc42	wt_uascdc4213894	wt_uascdc4228.lsm (cropped)	1.96	169.893	135.299
wt_uascdc42	wt_uascdc4213895	wt_uascdc4228.lsm (cropped)	0.546	163.652	128.72
wt_uascdc42	wt_uascdc4213896	wt_uascdc4228.lsm (cropped)	3.13	178.945	149.045
wt_uascdc42	wt_uascdc4213898	wt_uascdc4228.lsm (cropped)	0.281	160.631	138.509
wt_uascdc42	wt_uascdc4213900	wt_uascdc4228.lsm (cropped)	0.816	173.293	147.174
wt_uascdc42	wt_uascdc4213901	wt_uascdc4228.lsm (cropped)	3.24	184.156	148.789
wt_uascdc42	wt_uascdc4213902	wt_uascdc4228.lsm (cropped)	2.3	177.049	167.337
wt_uascdc42	wt_uascdc4213903	wt_uascdc4228.lsm (cropped)	3.17	182.118	172.383
wt_uascdc42	wt_uascdc4213904	wt_uascdc4228.lsm (cropped)	5.41	185.152	157.135
wt_uascdc42	wt_uascdc4213905	wt_uascdc4228.lsm (cropped)	2.4	181.368	147.409
wt_uascdc42	wt_uascdc4213907	wt_uascdc4228.lsm (cropped)	4.68	188.66	152.985
wt_uascdc42	wt_uascdc4213908	wt_uascdc4228.lsm (cropped)	2.05	177.194	142.318
wt_uascdc42	wt_uascdc4213909	wt_uascdc4228.lsm (cropped)	2.94	173.26	135.433
wt_uascdc42	wt_uascdc4213910	wt_uascdc4228.lsm (cropped)	0.6	173.735	138.868
wt_uascdc42	wt_uascdc4213911	wt_uascdc4228.lsm (cropped)	0.962	171.452	142.085
wt_uascdc42	wt_uascdc4213913	wt_uascdc4228.lsm (cropped)	3.53	180.375	140.736
wt_uascdc42	wt_uascdc4213914	wt_uascdc4228.lsm (cropped)	0.508	175.065	142.527
wt_uascdc42	wt_uascdc4213915	wt_uascdc4228.lsm (cropped)	1.45	176.528	127.913
wt_uascdc42	wt_uascdc4213917	wt_uascdc4228.lsm (cropped)	0.627	172.346	147.738
wt_uascdc42	wt_uascdc4213918	wt_uascdc4228.lsm (cropped)	3.34	184.211	157.84
wt_uascdc42	wt_uascdc4213919	wt_uascdc4228.lsm (cropped)	1.55	165.313	136.109
wt_uascdc42	wt_uascdc4213920	wt_uascdc4228.lsm (cropped)	1.48	179.802	149.925
wt_uascdc42	wt_uascdc4213922	wt_uascdc4228.lsm (cropped)	2.83	182.581	150.763
wt_uascdc42	wt_uascdc4213923	wt_uascdc4228.lsm (cropped)	0.276	160.865	136.008
wt_uascdc42	wt_uascdc4213924	wt_uascdc4228.lsm (cropped)	2.5	176.757	155.252
wt_uascdc42	wt_uascdc4213926	wt_uascdc4228.lsm (cropped)	0.433	168.543	156.801
wt_uascdc42	wt_uascdc4213928	wt_uascdc4228.lsm (cropped)	2.66	182.738	142.967
wt_uascdc42	wt_uascdc4213929	wt_uascdc4228.lsm (cropped)	1.91	198.408	163.463
wt_uascdc42	wt_uascdc4213930	wt_uascdc4228.lsm (cropped)	1.07	198.014	160.748
wt_uascdc42	wt_uascdc4213931	wt_uascdc4228.lsm (cropped)	2.37	196.151	184.124
wt_uascdc42	wt_uascdc4213932	wt_uascdc4228.lsm (cropped)	6.77	200.427	165.825
wt_uascdc42	wt_uascdc4213934	wt_uascdc4228.lsm (cropped)	2.27	186.053	153.221
wt_uascdc42	wt_uascdc4213935	wt_uascdc4228.lsm (cropped)	1.77	177.656	162.059
wt_uascdc42	wt_uascdc4213936	wt_uascdc4228.lsm (cropped)	1.47	177.52	134.994
wt_uascdc42	wt_uascdc4213937	wt_uascdc4228.lsm (cropped)	0.476	175.765	160.384
wt_uascdc42	wt_uascdc4213938	wt_uascdc4228.lsm (cropped)	2.68	185.819	152.514
wt_uascdc42	wt_uascdc4213940	wt_uascdc4228.lsm (cropped)	1.22	182.991	140.296
wt_uascdc42	wt_uascdc4213941	wt_uascdc4228.lsm (cropped)	1.01	183.258	144.244
wt_uascdc42	wt_uascdc4213942	wt_uascdc4228.lsm (cropped)	7.37	196.608	166.765
wt_uascdc42	wt_uascdc4213943	wt_uascdc4228.lsm (cropped)	2.23	190.993	151.168
wt_uascdc42	wt_uascdc4213944	wt_uascdc4228.lsm (cropped)	5.76	206.991	170.097
wt_uascdc42	wt_uascdc4213945	wt_uascdc4228.lsm (cropped)	6.47	197.247	165.552
wt_uascdc42	wt_uascdc4213946	wt_uascdc4228.lsm (cropped)	1.62	196.85	151.679
wt_uascdc42	wt_uascdc4213947	wt_uascdc4228.lsm (cropped)	3.3	180.886	158.607
wt_uascdc42	wt_uascdc4213949	wt_uascdc4228.lsm (cropped)	6.7	195.712	155.513
wt_uascdc42	wt_uascdc4213950	wt_uascdc4228.lsm (cropped)	1.54	181.919	133.375
wt_uascdc42	wt_uascdc4213951	wt_uascdc4228.lsm (cropped)	5.04	192.867	169.221
wt_uascdc42	wt_uascdc4213954	wt_uascdc4228.lsm (cropped)	8.27	193.617	179.336
wt_uascdc42	wt_uascdc4213955	wt_uascdc4228.lsm (cropped)	12.46	207.835	158.096
wt_uascdc42	wt_uascdc4213956	wt_uascdc4228.lsm (cropped)	1.27	183.694	149.699
wt_uascdc42	wt_uascdc4213957	wt_uascdc4228.lsm (cropped)	4.18	179.494	143.799
wt_uascdc42	wt_uascdc4213958	wt_uascdc4228.lsm (cropped)	2.54	182.427	150.249
wt_uascdc42	wt_uascdc4213959	wt_uascdc4228.lsm (cropped)	1.74	170.919	151.4
wt_uascdc42	wt_uascdc4213962	wt_uascdc4228.lsm (cropped)	3.3	180.869	151.819
wt_uascdc42	wt_uascdc4213963	wt_uascdc4228.lsm (cropped)	3.04	175.86	131.185
wt_uascdc42	wt_uascdc4213964	wt_uascdc4228.lsm (cropped)	0.979	191.721	147.963
wt_uascdc42	wt_uascdc4213965	wt_uascdc4228.lsm (cropped)	1.17	169.428	128.882
wt_uascdc42	wt_uascdc4213966	wt_uascdc4228.lsm (cropped)	0.406	163.324	146.079
wt_uascdc42	wt_uascdc4213967	wt_uascdc4228.lsm (cropped)	20.15	198.249	155.772
wt_uascdc42	wt_uascdc4213968	wt_uascdc4228.lsm (cropped)	10.86	189.893	149.66
wt_uascdc42	wt_uascdc4213969	wt_uascdc4228.lsm (cropped)	7.9	183.323	142.047
wt_uascdc42	wt_uascdc4213970	wt_uascdc4228.lsm (cropped)	0.573	169.594	128.221
wt_uascdc42	wt_uascdc4213973	wt_uascdc4228.lsm (cropped)	1.38	184.929	150.464
wt_uascdc42	wt_uascdc4213974	wt_uascdc4228.lsm (cropped)	0.26	161.954	174.608
wt_uascdc42	wt_uascdc4213975	wt_uascdc4228.lsm (cropped)	0.492	165.52	134.393
wt_uascdc42	wt_uascdc4215778	wt_uascdc4229.lsm (cropped)	0.989	160.191	161.703
wt_uascdc42	wt_uascdc4215779	wt_uascdc4229.lsm (cropped)	1.55	170.684	153.74
wt_uascdc42	wt_uascdc4215781	wt_uascdc4229.lsm (cropped)	0.297	165.46	190.444
wt_uascdc42	wt_uascdc4215783	wt_uascdc4229.lsm (cropped)	0.941	173.727	157.717
wt_uascdc42	wt_uascdc4215784	wt_uascdc4229.lsm (cropped)	0.384	161.216	137.359
wt_uascdc42	wt_uascdc4215785	wt_uascdc4229.lsm (cropped)	0.314	166.931	147.397
wt_uascdc42	wt_uascdc4215786	wt_uascdc4229.lsm (cropped)	0.53	162.159	139.224
wt_uascdc42	wt_uascdc4215787	wt_uascdc4229.lsm (cropped)	0.281	168.032	138.367
wt_uascdc42	wt_uascdc4215788	wt_uascdc4229.lsm (cropped)	1.54	176.529	149.765
wt_uascdc42	wt_uascdc4215789	wt_uascdc4229.lsm (cropped)	1.29	173.846	149.14
wt_uascdc42	wt_uascdc4215791	wt_uascdc4229.lsm (cropped)	1.3	169.856	166.463
wt_uascdc42	wt_uascdc4215792	wt_uascdc4229.lsm (cropped)	0.216	157.814	142.83
wt_uascdc42	wt_uascdc4215793	wt_uascdc4229.lsm (cropped)	1.09	167.139	170.738
wt_uascdc42	wt_uascdc4215794	wt_uascdc4229.lsm (cropped)	7.29	184.522	162.185
wt_uascdc42	wt_uascdc4215795	wt_uascdc4229.lsm (cropped)	1.19	170.883	148.966
wt_uascdc42	wt_uascdc4215796	wt_uascdc4229.lsm (cropped)	4.33	175.162	145.821
wt_uascdc42	wt_uascdc4215797	wt_uascdc4229.lsm (cropped)	1.77	183.934	138.007
wt_uascdc42	wt_uascdc4215799	wt_uascdc4229.lsm (cropped)	0.481	154.715	186.767
wt_uascdc42	wt_uascdc4215801	wt_uascdc4229.lsm (cropped)	1.63	169.194	143.501
wt_uascdc42	wt_uascdc4215802	wt_uascdc4229.lsm (cropped)	0.73	156.731	129.205
wt_uascdc42	wt_uascdc4215805	wt_uascdc4229.lsm (cropped)	0.606	162.766	129.816
wt_uascdc42	wt_uascdc4215806	wt_uascdc4229.lsm (cropped)	1.17	174.949	145.665
wt_uascdc42	wt_uascdc4215807	wt_uascdc4229.lsm (cropped)	0.806	164.902	133.532
wt_uascdc42	wt_uascdc4215808	wt_uascdc4229.lsm (cropped)	0.319	165.046	180.212
wt_uascdc42	wt_uascdc4215809	wt_uascdc4229.lsm (cropped)	0.335	161.664	135.742
wt_uascdc42	wt_uascdc4215810	wt_uascdc4229.lsm (cropped)	0.27	154.529	128.824
wt_uascdc42	wt_uascdc4215813	wt_uascdc4229.lsm (cropped)	3.94	170.301	151.145
wt_uascdc42	wt_uascdc4215814	wt_uascdc4229.lsm (cropped)	1.51	166.369	210.14
wt_uascdc42	wt_uascdc4215815	wt_uascdc4229.lsm (cropped)	0.843	169.784	160.553
wt_uascdc42	wt_uascdc4215816	wt_uascdc4229.lsm (cropped)	2.69	181.763	174.665
wt_uascdc42	wt_uascdc4215817	wt_uascdc4229.lsm (cropped)	1.41	176.412	145.206
wt_uascdc42	wt_uascdc4215819	wt_uascdc4229.lsm (cropped)	1.19	168.019	166.191
wt_uascdc42	wt_uascdc4215820	wt_uascdc4229.lsm (cropped)	0.26	162.97	159.378
wt_uascdc42	wt_uascdc4215821	wt_uascdc4229.lsm (cropped)	2.22	179.239	146.401
wt_uascdc42	wt_uascdc4215822	wt_uascdc4229.lsm (cropped)	1.06	175.096	155.357
wt_uascdc42	wt_uascdc4215824	wt_uascdc4229.lsm (cropped)	2.29	173.697	150.132
wt_uascdc42	wt_uascdc4215825	wt_uascdc4229.lsm (cropped)	2.65	173.671	140.834
wt_uascdc42	wt_uascdc4215826	wt_uascdc4229.lsm (cropped)	2.3	166.602	135.212
wt_uascdc42	wt_uascdc4215828	wt_uascdc4229.lsm (cropped)	3.95	168.298	141.463
wt_uascdc42	wt_uascdc4215829	wt_uascdc4229.lsm (cropped)	1.83	168.78	149.821
wt_uascdc42	wt_uascdc4215830	wt_uascdc4229.lsm (cropped)	1.9	179.391	163.137
wt_uascdc42	wt_uascdc4215832	wt_uascdc4229.lsm (cropped)	1.12	161.388	142.074
wt_uascdc42	wt_uascdc4215833	wt_uascdc4229.lsm (cropped)	0.843	169.022	147.799
wt_uascdc42	wt_uascdc4215834	wt_uascdc4229.lsm (cropped)	5.84	205.356	187.514
wt_uascdc42	wt_uascdc4215838	wt_uascdc4229.lsm (cropped)	2.27	171.942	140.511
wt_uascdc42	wt_uascdc4215841	wt_uascdc4229.lsm (cropped)	0.854	173.284	133.15
wt_uascdc42	wt_uascdc4215842	wt_uascdc4229.lsm (cropped)	1.12	169.324	139.589
wt_uascdc42	wt_uascdc4215843	wt_uascdc4229.lsm (cropped)	0.995	166.436	165.869
wt_uascdc42	wt_uascdc4215844	wt_uascdc4229.lsm (cropped)	0.535	170.223	143.252
wt_uascdc42	wt_uascdc4215846	wt_uascdc4229.lsm (cropped)	3.33	167.496	138.859
wt_uascdc42	wt_uascdc4215849	wt_uascdc4229.lsm (cropped)	0.476	159.938	133.701
wt_uascdc42	wt_uascdc4215850	wt_uascdc4229.lsm (cropped)	0.735	167.631	142.935
wt_uascdc42	wt_uascdc4215851	wt_uascdc4229.lsm (cropped)	1.07	158.697	140.976
wt_uascdc42	wt_uascdc4215853	wt_uascdc4229.lsm (cropped)	2.16	183.124	167.212
wt_uascdc42	wt_uascdc4215855	wt_uascdc4229.lsm (cropped)	2.16	173.53	200.466
wt_uascdc42	wt_uascdc4215856	wt_uascdc4229.lsm (cropped)	1.16	164.268	181.122
wt_uascdc42	wt_uascdc4215857	wt_uascdc4229.lsm (cropped)	1.82	166.333	129.394
wt_uascdc42	wt_uascdc4215861	wt_uascdc4229.lsm (cropped)	1.58	170.779	159.165
wt_uascdc42	wt_uascdc4215864	wt_uascdc4229.lsm (cropped)	0.503	158.554	140.549
wt_uascdc42	wt_uascdc4215865	wt_uascdc4229.lsm (cropped)	2.94	168.084	151.722
wt_uascdc42	wt_uascdc4215866	wt_uascdc4229.lsm (cropped)	3.6	177.024	151.163
wt_uascdc42	wt_uascdc4215867	wt_uascdc4229.lsm (cropped)	0.26	155.413	134.756
wt_uascdc42	wt_uascdc4215869	wt_uascdc4229.lsm (cropped)	0.492	163.144	131.266
wt_uascdc42	wt_uascdc4215870	wt_uascdc4229.lsm (cropped)	1.17	167.325	147.904
wt_uascdc42	wt_uascdc4215871	wt_uascdc4229.lsm (cropped)	2.8	179.115	138.232
wt_uascdc42	wt_uascdc4215873	wt_uascdc4229.lsm (cropped)	4.07	175.4	129.656
wt_uascdc42	wt_uascdc4215874	wt_uascdc4229.lsm (cropped)	1.14	164.899	135.98
wt_uascdc42	wt_uascdc4215877	wt_uascdc4229.lsm (cropped)	1.06	163.119	123.279
wt_uascdc42	wt_uascdc4215878	wt_uascdc4229.lsm (cropped)	0.211	156.167	152.24
wt_uascdc42	wt_uascdc4215880	wt_uascdc4229.lsm (cropped)	0.616	162.288	161.405
wt_uascdc42	wt_uascdc4215881	wt_uascdc4229.lsm (cropped)	6.76	178.352	161.414
wt_uascdc42	wt_uascdc4215882	wt_uascdc4229.lsm (cropped)	8.07	179.498	156.493
wt_uascdc42	wt_uascdc4215884	wt_uascdc4229.lsm (cropped)	0.995	168.489	136.617
wt_uascdc42	wt_uascdc4215885	wt_uascdc4229.lsm (cropped)	1.59	160.935	131.715
wt_uascdc42	wt_uascdc4215886	wt_uascdc4229.lsm (cropped)	0.465	157.364	132.78
wt_uascdc42	wt_uascdc4215887	wt_uascdc4229.lsm (cropped)	0.627	165.526	125.831
wt_uascdc42	wt_uascdc4215888	wt_uascdc4229.lsm (cropped)	2.31	167.004	134.298
wt_uascdc42	wt_uascdc4215889	wt_uascdc4229.lsm (cropped)	2.52	170.358	126.316
wt_uascdc42	wt_uascdc4215890	wt_uascdc4229.lsm (cropped)	1.48	165.176	124.097
wt_uascdc42	wt_uascdc4215891	wt_uascdc4229.lsm (cropped)	0.892	167.388	148.052
wt_uascdc42	wt_uascdc4215892	wt_uascdc4229.lsm (cropped)	0.979	166.655	143.434
wt_uascdc42	wt_uascdc4215893	wt_uascdc4229.lsm (cropped)	2.39	161.95	141.406
wt_uascdc42	wt_uascdc4215894	wt_uascdc4229.lsm (cropped)	0.579	159.91	134.209
wt_uascdc42	wt_uascdc4215895	wt_uascdc4229.lsm (cropped)	6.46	194.936	151.071
wt_uascdc42	wt_uascdc4215896	wt_uascdc4229.lsm (cropped)	2.15	176.235	143.719
wt_uascdc42	wt_uascdc4215897	wt_uascdc4229.lsm (cropped)	1.75	163.336	130.202
wt_uascdc42	wt_uascdc4215899	wt_uascdc4229.lsm (cropped)	1.14	154.655	121.629
wt_uascdc42	wt_uascdc4215900	wt_uascdc4229.lsm (cropped)	5.53	175.683	135.908
wt_uascdc42	wt_uascdc4215902	wt_uascdc4229.lsm (cropped)	0.67	169.147	143.269
wt_uascdc42	wt_uascdc4215903	wt_uascdc4229.lsm (cropped)	0.238	156.9	144.923
wt_uascdc42	wt_uascdc4215905	wt_uascdc4229.lsm (cropped)	0.476	165.833	145.051
wt_uascdc42	wt_uascdc4215906	wt_uascdc4229.lsm (cropped)	0.962	158.27	127.133
wt_uascdc42	wt_uascdc4215908	wt_uascdc4229.lsm (cropped)	1.21	154.55	131.733
wt_uascdc42	wt_uascdc4215909	wt_uascdc4229.lsm (cropped)	0.519	159.736	127.856
wt_uascdc42	wt_uascdc4215910	wt_uascdc4229.lsm (cropped)	0.816	175.54	137.613
wt_uascdc42	wt_uascdc4215911	wt_uascdc4229.lsm (cropped)	0.789	159.955	156.527
wt_uascdc42	wt_uascdc4215913	wt_uascdc4229.lsm (cropped)	1.03	170.516	160.948
wt_uascdc42	wt_uascdc4215914	wt_uascdc4229.lsm (cropped)	1.06	163.676	164.52
wt_uascdc42	wt_uascdc4215915	wt_uascdc4229.lsm (cropped)	0.551	160.528	147.99
wt_uascdc42	wt_uascdc4215916	wt_uascdc4229.lsm (cropped)	3.33	163.938	128.756
wt_uascdc42	wt_uascdc4215918	wt_uascdc4229.lsm (cropped)	0.968	169.876	141.415
wt_uascdc42	wt_uascdc4215919	wt_uascdc4229.lsm (cropped)	2.23	165.188	148.883
wt_uascdc42	wt_uascdc4215920	wt_uascdc4229.lsm (cropped)	1.73	164.739	150.166
wt_uascdc42	wt_uascdc4215921	wt_uascdc4229.lsm (cropped)	7.61	177.357	143.088
wt_uascdc42	wt_uascdc4215922	wt_uascdc4229.lsm (cropped)	1.5	166.082	141.849
wt_uascdc42	wt_uascdc4215923	wt_uascdc4229.lsm (cropped)	8.58	175.149	144.786
wt_uascdc42	wt_uascdc4215927	wt_uascdc4229.lsm (cropped)	0.908	174.467	142.773
wt_uascdc42	wt_uascdc4215928	wt_uascdc4229.lsm (cropped)	0.287	157.8	157.919
wt_uascdc42	wt_uascdc4215930	wt_uascdc4229.lsm (cropped)	0.427	157.72	136.418
wt_uascdc42	wt_uascdc4215931	wt_uascdc4229.lsm (cropped)	1.98	181.446	144.307
wt_uascdc42	wt_uascdc4215933	wt_uascdc4229.lsm (cropped)	0.806	163.439	155.769
wt_uascdc42	wt_uascdc4215934	wt_uascdc4229.lsm (cropped)	0.887	159.323	143.759
wt_uascdc42	wt_uascdc4215936	wt_uascdc4229.lsm (cropped)	5.05	176.339	143.761
wt_uascdc42	wt_uascdc4215937	wt_uascdc4229.lsm (cropped)	2.62	176.747	163.876
wt_uascdc42	wt_uascdc4215938	wt_uascdc4229.lsm (cropped)	1.3	163.356	143.665
wt_uascdc42	wt_uascdc4215939	wt_uascdc4229.lsm (cropped)	4.69	172.603	152.311
wt_uascdc42	wt_uascdc4215940	wt_uascdc4229.lsm (cropped)	3.33	172.247	160.106
wt_uascdc42	wt_uascdc4215941	wt_uascdc4229.lsm (cropped)	4.26	178.026	150.278
wt_uascdc42	wt_uascdc4215942	wt_uascdc4229.lsm (cropped)	0.93	167.486	144.784
wt_uascdc42	wt_uascdc4215943	wt_uascdc4229.lsm (cropped)	2.67	171.424	143.434
wt_uascdc42	wt_uascdc4215944	wt_uascdc4229.lsm (cropped)	2	173.164	143.818
wt_uascdc42	wt_uascdc4215945	wt_uascdc4229.lsm (cropped)	0.616	161.196	136.962
wt_uascdc42	wt_uascdc4215946	wt_uascdc4229.lsm (cropped)	1.15	159.542	147.163
wt_uascdc42	wt_uascdc4215947	wt_uascdc4229.lsm (cropped)	6.16	198.821	146.98
wt_uascdc42	wt_uascdc4215948	wt_uascdc4229.lsm (cropped)	0.811	162.243	129.217
wt_uascdc42	wt_uascdc4215949	wt_uascdc4229.lsm (cropped)	1.49	163.696	145.41
wt_uascdc42	wt_uascdc4215950	wt_uascdc4229.lsm (cropped)	4.17	171.851	151.908
wt_uascdc42	wt_uascdc4215951	wt_uascdc4229.lsm (cropped)	2.96	174.358	154.151
wt_uascdc42	wt_uascdc4215952	wt_uascdc4229.lsm (cropped)	0.422	158.779	139.108
wt_uascdc42	wt_uascdc4215953	wt_uascdc4229.lsm (cropped)	6.26	181.569	155.008
wt_uascdc42	wt_uascdc4215954	wt_uascdc4229.lsm (cropped)	1.28	165.116	137.652
wt_uascdc42	wt_uascdc4215955	wt_uascdc4229.lsm (cropped)	4.54	174.699	130.422
wt_uascdc42	wt_uascdc4215956	wt_uascdc4229.lsm (cropped)	0.384	157.659	127.44
wt_uascdc42	wt_uascdc4215957	wt_uascdc4229.lsm (cropped)	0.67	158.169	124.811
wt_uascdc42	wt_uascdc4215959	wt_uascdc4229.lsm (cropped)	1.92	163.721	141.365
wt_uascdc42	wt_uascdc4215960	wt_uascdc4229.lsm (cropped)	1.36	164.455	144.144
wt_uascdc42	wt_uascdc4215961	wt_uascdc4229.lsm (cropped)	0.687	166.314	141.586
wt_uascdc42	wt_uascdc4215962	wt_uascdc4229.lsm (cropped)	3.94	180.577	147.313
wt_uascdc42	wt_uascdc4215963	wt_uascdc4229.lsm (cropped)	4.42	166.919	135.389
wt_uascdc42	wt_uascdc4215964	wt_uascdc4229.lsm (cropped)	1.17	165.823	130.339
wt_uascdc42	wt_uascdc4215965	wt_uascdc4229.lsm (cropped)	0.741	151.588	132.776
wt_uascdc42	wt_uascdc4215967	wt_uascdc4229.lsm (cropped)	3.13	175.452	153.664
wt_uascdc42	wt_uascdc4215968	wt_uascdc4229.lsm (cropped)	2.65	163.247	138.469
wt_uascdc42	wt_uascdc4215969	wt_uascdc4229.lsm (cropped)	0.643	163.381	139.735
wt_uascdc42	wt_uascdc4215972	wt_uascdc4229.lsm (cropped)	0.703	168.045	141.719
wt_uascdc42	wt_uascdc4215973	wt_uascdc4229.lsm (cropped)	2.96	174.052	141.975
wt_uascdc42	wt_uascdc4215978	wt_uascdc4229.lsm (cropped)	0.935	157.735	125.407
wt_uascdc42	wt_uascdc4215979	wt_uascdc4229.lsm (cropped)	0.53	161.383	142.471
wt_uascdc42	wt_uascdc4215980	wt_uascdc4229.lsm (cropped)	1.15	172.095	150.651
wt_uascdc42	wt_uascdc4215981	wt_uascdc4229.lsm (cropped)	0.811	162.123	140.503
wt_uascdc42	wt_uascdc4215982	wt_uascdc4229.lsm (cropped)	5.4	175.509	145.025
wt_uascdc42	wt_uascdc4215984	wt_uascdc4229.lsm (cropped)	2.15	166.385	138.492
wt_uascdc42	wt_uascdc4215985	wt_uascdc4229.lsm (cropped)	1.95	163.934	131.48
wt_uascdc42	wt_uascdc4215986	wt_uascdc4229.lsm (cropped)	0.843	156.47	137.334
wt_uascdc42	wt_uascdc4215987	wt_uascdc4229.lsm (cropped)	1.09	158.612	120.791
wt_uascdc42	wt_uascdc4215989	wt_uascdc4229.lsm (cropped)	0.292	154.191	132.649
wt_uascdc42	wt_uascdc4215990	wt_uascdc4229.lsm (cropped)	1.97	167.199	138.575
wt_uascdc42	wt_uascdc4215991	wt_uascdc4229.lsm (cropped)	1.01	160.28	142.03
wt_uascdc42	wt_uascdc4215992	wt_uascdc4229.lsm (cropped)	1.04	167.523	151.831
wt_uascdc42	wt_uascdc4215993	wt_uascdc4229.lsm (cropped)	0.849	165.482	146.215
wt_uascdc42	wt_uascdc4215994	wt_uascdc4229.lsm (cropped)	2.98	169.692	160.813
wt_uascdc42	wt_uascdc4215995	wt_uascdc4229.lsm (cropped)	1.33	167.709	141.691
wt_uascdc42	wt_uascdc4215996	wt_uascdc4229.lsm (cropped)	6.29	176.849	150.179
wt_uascdc42	wt_uascdc4215997	wt_uascdc4229.lsm (cropped)	1.64	172.353	130.983
wt_uascdc42	wt_uascdc4215998	wt_uascdc4229.lsm (cropped)	2.69	193.873	166.174
wt_uascdc42	wt_uascdc4215999	wt_uascdc4229.lsm (cropped)	1.75	177.209	156.801
wt_uascdc42	wt_uascdc4216000	wt_uascdc4229.lsm (cropped)	2.35	183.457	160.707
wt_uascdc42	wt_uascdc4216002	wt_uascdc4229.lsm (cropped)	0.979	161.829	131.127
wt_uascdc42	wt_uascdc4216003	wt_uascdc4229.lsm (cropped)	9.34	190.093	166.846
wt_uascdc42	wt_uascdc4216004	wt_uascdc4229.lsm (cropped)	2.73	176.532	142.822
wt_uascdc42	wt_uascdc4216005	wt_uascdc4229.lsm (cropped)	2	165.379	148.062
wt_uascdc42	wt_uascdc4216006	wt_uascdc4229.lsm (cropped)	0.616	166.384	137.906
wt_uascdc42	wt_uascdc4216007	wt_uascdc4229.lsm (cropped)	0.519	161.667	132.43
wt_uascdc42	wt_uascdc4216008	wt_uascdc4229.lsm (cropped)	9.94	190.325	158.449
wt_uascdc42	wt_uascdc4216009	wt_uascdc4229.lsm (cropped)	1.84	168.135	140.07
wt_uascdc42	wt_uascdc4216010	wt_uascdc4229.lsm (cropped)	1.37	158.022	134.777
wt_uascdc42	wt_uascdc4216012	wt_uascdc4229.lsm (cropped)	0.384	153.463	138.411
wt_uascdc42	wt_uascdc4216013	wt_uascdc4229.lsm (cropped)	0.838	158.632	141.291
wt_uascdc42	wt_uascdc4216014	wt_uascdc4229.lsm (cropped)	3.55	164.78	124.244
homo_uascdc42	homo_uascdc421095	homo_uascdc42Homo_01_NH_GFP_positive.lsm (cropped)	1.27	167.009	214.373
homo_uascdc42	homo_uascdc421103	homo_uascdc42Homo_01_NH_GFP_positive.lsm (cropped)	1.97	164.97	87.7101
homo_uascdc42	homo_uascdc421129	homo_uascdc42Homo_01_NH_GFP_positive.lsm (cropped)	0.86	150.057	67.0785
homo_uascdc42	homo_uascdc421142	homo_uascdc42Homo_01_NH_GFP_positive.lsm (cropped)	0.843	159.558	132.109
homo_uascdc42	homo_uascdc421145	homo_uascdc42Homo_01_NH_GFP_positive.lsm (cropped)	2.11	162.967	67.5891
homo_uascdc42	homo_uascdc421147	homo_uascdc42Homo_01_NH_GFP_positive.lsm (cropped)	0.308	149.049	103.694
homo_uascdc42	homo_uascdc421150	homo_uascdc42Homo_01_NH_GFP_positive.lsm (cropped)	0.422	147.236	190.312
homo_uascdc42	homo_uascdc421151	homo_uascdc42Homo_01_NH_GFP_positive.lsm (cropped)	4.29	186.491	111.806
homo_uascdc42	homo_uascdc421152	homo_uascdc42Homo_01_NH_GFP_positive.lsm (cropped)	0.833	163.358	122.454
homo_uascdc42	homo_uascdc421154	homo_uascdc42Homo_01_NH_GFP_positive.lsm (cropped)	2.59	157.758	202.707
homo_uascdc42	homo_uascdc421155	homo_uascdc42Homo_01_NH_GFP_positive.lsm (cropped)	2.14	173.717	73.4722
homo_uascdc42	homo_uascdc421162	homo_uascdc42Homo_01_NH_GFP_positive.lsm (cropped)	1.5	180.92	52.0299
homo_uascdc42	homo_uascdc421163	homo_uascdc42Homo_01_NH_GFP_positive.lsm (cropped)	2.38	174.14	81.3693
homo_uascdc42	homo_uascdc421164	homo_uascdc42Homo_01_NH_GFP_positive.lsm (cropped)	0.303	150.321	224.324
homo_uascdc42	homo_uascdc421169	homo_uascdc42Homo_01_NH_GFP_positive.lsm (cropped)	0.87	161.473	54.1804
homo_uascdc42	homo_uascdc421179	homo_uascdc42Homo_01_NH_GFP_positive.lsm (cropped)	4.65	173.845	107.214
homo_uascdc42	homo_uascdc421181	homo_uascdc42Homo_01_NH_GFP_positive.lsm (cropped)	1.24	155.377	146.056
homo_uascdc42	homo_uascdc421193	homo_uascdc42Homo_01_NH_GFP_positive.lsm (cropped)	1.69	161.231	107.887
homo_uascdc42	homo_uascdc421194	homo_uascdc42Homo_01_NH_GFP_positive.lsm (cropped)	0.898	160.331	185.221
homo_uascdc42	homo_uascdc421206	homo_uascdc42Homo_01_NH_GFP_positive.lsm (cropped)	0.714	153.706	78.9029
homo_uascdc42	homo_uascdc421213	homo_uascdc42Homo_01_NH_GFP_positive.lsm (cropped)	0.86	150.378	73.3048
homo_uascdc42	homo_uascdc421215	homo_uascdc42Homo_01_NH_GFP_positive.lsm (cropped)	5.77	169.95	174.878
homo_uascdc42	homo_uascdc421219	homo_uascdc42Homo_01_NH_GFP_positive.lsm (cropped)	2.65	152.934	57.841
homo_uascdc42	homo_uascdc421222	homo_uascdc42Homo_01_NH_GFP_positive.lsm (cropped)	4.76	158.343	145.616
homo_uascdc42	homo_uascdc421227	homo_uascdc42Homo_01_NH_GFP_positive.lsm (cropped)	0.265	140.56	140.44
homo_uascdc42	homo_uascdc421232	homo_uascdc42Homo_01_NH_GFP_positive.lsm (cropped)	0.249	145.593	186.036
homo_uascdc42	homo_uascdc421245	homo_uascdc42Homo_01_NH_GFP_positive.lsm (cropped)	5.94	167.358	61.5933
homo_uascdc42	homo_uascdc421260	homo_uascdc42Homo_01_NH_GFP_positive.lsm (cropped)	0.416	142.876	66.0791
homo_uascdc42	homo_uascdc421264	homo_uascdc42Homo_01_NH_GFP_positive.lsm (cropped)	4.86	157.174	92.7257
homo_uascdc42	homo_uascdc421282	homo_uascdc42Homo_01_NH_GFP_positive.lsm (cropped)	0.984	147.509	65.1884
homo_uascdc42	homo_uascdc421314	homo_uascdc42Homo_01_NH_GFP_positive.lsm (cropped)	1.78	164.944	35.4608
homo_uascdc42	homo_uascdc421320	homo_uascdc42Homo_01_NH_GFP_positive.lsm (cropped)	0.627	150.352	105.607
homo_uascdc42	homo_uascdc421340	homo_uascdc42Homo_01_NH_GFP_positive.lsm (cropped)	0.346	151.31	195.286
homo_uascdc42	homo_uascdc421348	homo_uascdc42Homo_01_NH_GFP_positive.lsm (cropped)	8.8	164.995	70.246
homo_uascdc42	homo_uascdc421349	homo_uascdc42Homo_01_NH_GFP_positive.lsm (cropped)	0.595	145.078	57.081
homo_uascdc42	homo_uascdc421375	homo_uascdc42Homo_01_NH_GFP_positive.lsm (cropped)	9.99	154.32	85.5764
homo_uascdc42	homo_uascdc421376	homo_uascdc42Homo_01_NH_GFP_positive.lsm (cropped)	5.37	166.572	41.2406
homo_uascdc42	homo_uascdc421383	homo_uascdc42Homo_01_NH_GFP_positive.lsm (cropped)	1.61	153.18	154.708
homo_uascdc42	homo_uascdc421386	homo_uascdc42Homo_01_NH_GFP_positive.lsm (cropped)	0.898	161.762	152.879
homo_uascdc42	homo_uascdc421391	homo_uascdc42Homo_01_NH_GFP_positive.lsm (cropped)	1.34	153.795	158.273
homo_uascdc42	homo_uascdc421392	homo_uascdc42Homo_01_NH_GFP_positive.lsm (cropped)	2.91	155.202	58.5822
homo_uascdc42	homo_uascdc421396	homo_uascdc42Homo_01_NH_GFP_positive.lsm (cropped)	0.735	147.715	49.5924
homo_uascdc42	homo_uascdc421398	homo_uascdc42Homo_01_NH_GFP_positive.lsm (cropped)	2.16	146.233	118.91
homo_uascdc42	homo_uascdc421403	homo_uascdc42Homo_01_NH_GFP_positive.lsm (cropped)	6.61	182.938	30.45
homo_uascdc42	homo_uascdc421407	homo_uascdc42Homo_01_NH_GFP_positive.lsm (cropped)	3.04	171.713	128.635
homo_uascdc42	homo_uascdc421413	homo_uascdc42Homo_01_NH_GFP_positive.lsm (cropped)	1.63	161.563	52.9439
homo_uascdc42	homo_uascdc421415	homo_uascdc42Homo_01_NH_GFP_positive.lsm (cropped)	1.38	151.326	173.871
homo_uascdc42	homo_uascdc421417	homo_uascdc42Homo_01_NH_GFP_positive.lsm (cropped)	7.75	172.622	53.582
homo_uascdc42	homo_uascdc421418	homo_uascdc42Homo_01_NH_GFP_positive.lsm (cropped)	3.22	156.797	99.8295
homo_uascdc42	homo_uascdc421419	homo_uascdc42Homo_01_NH_GFP_positive.lsm (cropped)	9.2	174.899	102.742
homo_uascdc42	homo_uascdc421421	homo_uascdc42Homo_01_NH_GFP_positive.lsm (cropped)	10.57	168.137	92.4517
homo_uascdc42	homo_uascdc422802	homo_uascdc42Homo_05_NH_GFP_positive.lsm (cropped)	0.627	152.828	77.574
homo_uascdc42	homo_uascdc422805	homo_uascdc42Homo_05_NH_GFP_positive.lsm (cropped)	2.19	171.007	28.3212
homo_uascdc42	homo_uascdc422813	homo_uascdc42Homo_05_NH_GFP_positive.lsm (cropped)	1.54	151.113	43.5525
homo_uascdc42	homo_uascdc422814	homo_uascdc42Homo_05_NH_GFP_positive.lsm (cropped)	1.46	154.408	62.2835
homo_uascdc42	homo_uascdc422818	homo_uascdc42Homo_05_NH_GFP_positive.lsm (cropped)	0.427	148.215	137.883
homo_uascdc42	homo_uascdc422824	homo_uascdc42Homo_05_NH_GFP_positive.lsm (cropped)	3.41	163.665	39.2804
homo_uascdc42	homo_uascdc422827	homo_uascdc42Homo_05_NH_GFP_positive.lsm (cropped)	0.692	148.762	52.8766
homo_uascdc42	homo_uascdc422829	homo_uascdc42Homo_05_NH_GFP_positive.lsm (cropped)	0.914	146.338	167.036
homo_uascdc42	homo_uascdc422850	homo_uascdc42Homo_05_NH_GFP_positive.lsm (cropped)	1.02	170.687	72.9501
homo_uascdc42	homo_uascdc422852	homo_uascdc42Homo_05_NH_GFP_positive.lsm (cropped)	0.476	148.811	76.2445
homo_uascdc42	homo_uascdc422860	homo_uascdc42Homo_05_NH_GFP_positive.lsm (cropped)	0.541	153.353	41.8622
homo_uascdc42	homo_uascdc422895	homo_uascdc42Homo_05_NH_GFP_positive.lsm (cropped)	5.41	166.783	24.3633
homo_uascdc42	homo_uascdc422901	homo_uascdc42Homo_05_NH_GFP_positive.lsm (cropped)	3.09	160.467	38.0388
homo_uascdc42	homo_uascdc422904	homo_uascdc42Homo_05_NH_GFP_positive.lsm (cropped)	0.865	153.955	50.3184
homo_uascdc42	homo_uascdc422905	homo_uascdc42Homo_05_NH_GFP_positive.lsm (cropped)	3.28	175.824	38.2752
homo_uascdc42	homo_uascdc422906	homo_uascdc42Homo_05_NH_GFP_positive.lsm (cropped)	3.91	159.731	40.3301
homo_uascdc42	homo_uascdc422916	homo_uascdc42Homo_05_NH_GFP_positive.lsm (cropped)	2.49	189.858	72.1548
homo_uascdc42	homo_uascdc422917	homo_uascdc42Homo_05_NH_GFP_positive.lsm (cropped)	1.34	156.017	44.3229
homo_uascdc42	homo_uascdc422919	homo_uascdc42Homo_05_NH_GFP_positive.lsm (cropped)	1.49	165.858	116.982
homo_uascdc42	homo_uascdc422925	homo_uascdc42Homo_05_NH_GFP_positive.lsm (cropped)	5.62	168.251	92.2768
homo_uascdc42	homo_uascdc422928	homo_uascdc42Homo_05_NH_GFP_positive.lsm (cropped)	10.84	170.055	72.0297
homo_uascdc42	homo_uascdc422943	homo_uascdc42Homo_05_NH_GFP_positive.lsm (cropped)	3.16	156.306	30.2003
homo_uascdc42	homo_uascdc422947	homo_uascdc42Homo_05_NH_GFP_positive.lsm (cropped)	0.205	143.668	90.3824
homo_uascdc42	homo_uascdc422948	homo_uascdc42Homo_05_NH_GFP_positive.lsm (cropped)	1.88	155.655	65.1564
homo_uascdc42	homo_uascdc422949	homo_uascdc42Homo_05_NH_GFP_positive.lsm (cropped)	4.23	154.772	96.0659
homo_uascdc42	homo_uascdc422954	homo_uascdc42Homo_05_NH_GFP_positive.lsm (cropped)	0.373	151.538	137.266
homo_uascdc42	homo_uascdc422959	homo_uascdc42Homo_05_NH_GFP_positive.lsm (cropped)	1.91	145.807	105.452
homo_uascdc42	homo_uascdc422961	homo_uascdc42Homo_05_NH_GFP_positive.lsm (cropped)	0.297	144.219	31.9431
homo_uascdc42	homo_uascdc422962	homo_uascdc42Homo_05_NH_GFP_positive.lsm (cropped)	3.58	164.072	69.0764
homo_uascdc42	homo_uascdc422964	homo_uascdc42Homo_05_NH_GFP_positive.lsm (cropped)	3.6	154.622	56.3181
homo_uascdc42	homo_uascdc422969	homo_uascdc42Homo_05_NH_GFP_positive.lsm (cropped)	1.38	158.548	93.2464
homo_uascdc42	homo_uascdc422975	homo_uascdc42Homo_05_NH_GFP_positive.lsm (cropped)	7.69	167.871	71.2528
homo_uascdc42	homo_uascdc422978	homo_uascdc42Homo_05_NH_GFP_positive.lsm (cropped)	3.44	151.573	57.8193
homo_uascdc42	homo_uascdc422979	homo_uascdc42Homo_05_NH_GFP_positive.lsm (cropped)	0.892	147.048	62.537
homo_uascdc42	homo_uascdc422982	homo_uascdc42Homo_05_NH_GFP_positive.lsm (cropped)	0.222	144.488	65.1209
homo_uascdc42	homo_uascdc422986	homo_uascdc42Homo_05_NH_GFP_positive.lsm (cropped)	4.66	165.816	36.3568
homo_uascdc42	homo_uascdc422997	homo_uascdc42Homo_05_NH_GFP_positive.lsm (cropped)	0.476	143.539	58.2985
homo_uascdc42	homo_uascdc423004	homo_uascdc42Homo_05_NH_GFP_positive.lsm (cropped)	12.78	174.239	52.8726
homo_uascdc42	homo_uascdc423007	homo_uascdc42Homo_05_NH_GFP_positive.lsm (cropped)	5.35	168.786	51.3058
homo_uascdc42	homo_uascdc423009	homo_uascdc42Homo_05_NH_GFP_positive.lsm (cropped)	0.47	142.602	114.922
homo_uascdc42	homo_uascdc423013	homo_uascdc42Homo_05_NH_GFP_positive.lsm (cropped)	2.4	149.692	118.239
homo_uascdc42	homo_uascdc424535	homo_uascdc4217.lsm (cropped)	0.433	134.11	121.354
homo_uascdc42	homo_uascdc424536	homo_uascdc4217.lsm (cropped)	0.222	131.514	109.488
homo_uascdc42	homo_uascdc424537	homo_uascdc4217.lsm (cropped)	0.67	136.736	122.882
homo_uascdc42	homo_uascdc424539	homo_uascdc4217.lsm (cropped)	4.14	151.816	132.72
homo_uascdc42	homo_uascdc424541	homo_uascdc4217.lsm (cropped)	5.62	153.727	153.667
homo_uascdc42	homo_uascdc424544	homo_uascdc4217.lsm (cropped)	1.55	139.385	207.556
homo_uascdc42	homo_uascdc424547	homo_uascdc4217.lsm (cropped)	0.73	138.878	130.306
homo_uascdc42	homo_uascdc424548	homo_uascdc4217.lsm (cropped)	1.08	141.238	114.748
homo_uascdc42	homo_uascdc424549	homo_uascdc4217.lsm (cropped)	1.39	144.409	119.491
homo_uascdc42	homo_uascdc424550	homo_uascdc4217.lsm (cropped)	2.71	156.846	135.844
homo_uascdc42	homo_uascdc424551	homo_uascdc4217.lsm (cropped)	3.43	140.676	110.623
homo_uascdc42	homo_uascdc424552	homo_uascdc4217.lsm (cropped)	1.55	147.109	122.612
homo_uascdc42	homo_uascdc424559	homo_uascdc4217.lsm (cropped)	0.449	141.109	114.733
homo_uascdc42	homo_uascdc424560	homo_uascdc4217.lsm (cropped)	3.05	157.317	124.477
homo_uascdc42	homo_uascdc424562	homo_uascdc4217.lsm (cropped)	2.28	147.485	121.192
homo_uascdc42	homo_uascdc424563	homo_uascdc4217.lsm (cropped)	4.47	144.575	165.486
homo_uascdc42	homo_uascdc424568	homo_uascdc4217.lsm (cropped)	0.573	134.872	116.697
homo_uascdc42	homo_uascdc424569	homo_uascdc4217.lsm (cropped)	1.04	144.567	116.776
homo_uascdc42	homo_uascdc424570	homo_uascdc4217.lsm (cropped)	0.935	146.258	112.169
homo_uascdc42	homo_uascdc424571	homo_uascdc4217.lsm (cropped)	0.481	136.622	152.2
homo_uascdc42	homo_uascdc424575	homo_uascdc4217.lsm (cropped)	0.957	135.624	116.298
homo_uascdc42	homo_uascdc424576	homo_uascdc4217.lsm (cropped)	2.3	162.942	113.785
homo_uascdc42	homo_uascdc424577	homo_uascdc4217.lsm (cropped)	2.37	161.283	113.559
homo_uascdc42	homo_uascdc424580	homo_uascdc4217.lsm (cropped)	0.47	132.154	115.505
homo_uascdc42	homo_uascdc424581	homo_uascdc4217.lsm (cropped)	3.01	141.339	118.907
homo_uascdc42	homo_uascdc424585	homo_uascdc4217.lsm (cropped)	1.05	139.398	109.285
homo_uascdc42	homo_uascdc424586	homo_uascdc4217.lsm (cropped)	2.38	143.842	170.629
homo_uascdc42	homo_uascdc424587	homo_uascdc4217.lsm (cropped)	3.39	138.688	138.881
homo_uascdc42	homo_uascdc424588	homo_uascdc4217.lsm (cropped)	2.84	150.09	136.828
homo_uascdc42	homo_uascdc424589	homo_uascdc4217.lsm (cropped)	4.64	142.263	119.408
homo_uascdc42	homo_uascdc424591	homo_uascdc4217.lsm (cropped)	1.83	145.649	112.072
homo_uascdc42	homo_uascdc424595	homo_uascdc4217.lsm (cropped)	1.08	146.3	117.554
homo_uascdc42	homo_uascdc424602	homo_uascdc4217.lsm (cropped)	6.25	147.674	112.883
homo_uascdc42	homo_uascdc424605	homo_uascdc4217.lsm (cropped)	3.85	144.891	113.007
homo_uascdc42	homo_uascdc424606	homo_uascdc4217.lsm (cropped)	2.01	142.914	114.638
homo_uascdc42	homo_uascdc424608	homo_uascdc4217.lsm (cropped)	8.97	164.391	132.562
homo_uascdc42	homo_uascdc424611	homo_uascdc4217.lsm (cropped)	1.51	149.77	118.473
homo_uascdc42	homo_uascdc424612	homo_uascdc4217.lsm (cropped)	3.44	150.879	108.818
homo_uascdc42	homo_uascdc424614	homo_uascdc4217.lsm (cropped)	6.91	148.121	112.871
homo_uascdc42	homo_uascdc424615	homo_uascdc4217.lsm (cropped)	4.26	153.486	126.112
homo_uascdc42	homo_uascdc424616	homo_uascdc4217.lsm (cropped)	0.205	139.192	121.414
homo_uascdc42	homo_uascdc424617	homo_uascdc4217.lsm (cropped)	1.02	148.929	180.614
homo_uascdc42	homo_uascdc424618	homo_uascdc4217.lsm (cropped)	0.762	133.47	135.835
homo_uascdc42	homo_uascdc424619	homo_uascdc4217.lsm (cropped)	0.849	144.936	118.178
homo_uascdc42	homo_uascdc424624	homo_uascdc4217.lsm (cropped)	5.2	148.063	121.286
homo_uascdc42	homo_uascdc424625	homo_uascdc4217.lsm (cropped)	8.27	145.941	124.905
homo_uascdc42	homo_uascdc424626	homo_uascdc4217.lsm (cropped)	1.74	145.35	108.069
homo_uascdc42	homo_uascdc424628	homo_uascdc4217.lsm (cropped)	2.25	139.516	112.969
homo_uascdc42	homo_uascdc424630	homo_uascdc4217.lsm (cropped)	3.84	139.726	108.16
homo_uascdc42	homo_uascdc424632	homo_uascdc4217.lsm (cropped)	0.8	144.805	112.267
homo_uascdc42	homo_uascdc424636	homo_uascdc4217.lsm (cropped)	1.5	139.431	145.757
homo_uascdc42	homo_uascdc424639	homo_uascdc4217.lsm (cropped)	0.443	133.068	121.739
homo_uascdc42	homo_uascdc424640	homo_uascdc4217.lsm (cropped)	6.4	147.819	152.547
homo_uascdc42	homo_uascdc424641	homo_uascdc4217.lsm (cropped)	0.968	143.971	121.092
homo_uascdc42	homo_uascdc424643	homo_uascdc4217.lsm (cropped)	0.708	146.833	139.48
homo_uascdc42	homo_uascdc424644	homo_uascdc4217.lsm (cropped)	1.95	140.028	109.788
homo_uascdc42	homo_uascdc424648	homo_uascdc4217.lsm (cropped)	2.48	153.434	121.962
homo_uascdc42	homo_uascdc424651	homo_uascdc4217.lsm (cropped)	0.557	133.668	121.879
homo_uascdc42	homo_uascdc424654	homo_uascdc4217.lsm (cropped)	4.51	150.709	118.986
homo_uascdc42	homo_uascdc424664	homo_uascdc4217.lsm (cropped)	2.92	154.366	115.094
homo_uascdc42	homo_uascdc424665	homo_uascdc4217.lsm (cropped)	1.7	151.216	113.016
homo_uascdc42	homo_uascdc424667	homo_uascdc4217.lsm (cropped)	5.72	155.876	118.323
homo_uascdc42	homo_uascdc424669	homo_uascdc4217.lsm (cropped)	2.34	141.775	108.262
homo_uascdc42	homo_uascdc424670	homo_uascdc4217.lsm (cropped)	5.02	156.888	117.098
homo_uascdc42	homo_uascdc424671	homo_uascdc4217.lsm (cropped)	1.37	143.348	110.782
homo_uascdc42	homo_uascdc424672	homo_uascdc4217.lsm (cropped)	7.01	165.661	124.013
homo_uascdc42	homo_uascdc424673	homo_uascdc4217.lsm (cropped)	1.1	138.163	115.406
homo_uascdc42	homo_uascdc424674	homo_uascdc4217.lsm (cropped)	3.49	151.96	117.413
homo_uascdc42	homo_uascdc424675	homo_uascdc4217.lsm (cropped)	1.96	142.103	117.584
homo_uascdc42	homo_uascdc424676	homo_uascdc4217.lsm (cropped)	4.11	151.573	116.753
homo_uascdc42	homo_uascdc424677	homo_uascdc4217.lsm (cropped)	7.75	151.53	109.805
homo_uascdc42	homo_uascdc424678	homo_uascdc4217.lsm (cropped)	9.49	164.773	127.393
homo_uascdc42	homo_uascdc424679	homo_uascdc4217.lsm (cropped)	14.57	160.571	125.076
homo_uascdc42	homo_uascdc424680	homo_uascdc4217.lsm (cropped)	8.66	154.201	115.696
homo_uascdc42	homo_uascdc424681	homo_uascdc4217.lsm (cropped)	3.63	149.036	105.663
homo_uascdc42	homo_uascdc424682	homo_uascdc4217.lsm (cropped)	5.56	151.771	118.788
homo_uascdc42	homo_uascdc424683	homo_uascdc4217.lsm (cropped)	8.34	152.636	113.892
homo_uascdc42	homo_uascdc424684	homo_uascdc4217.lsm (cropped)	1.84	137.564	107.001
homo_uascdc42	homo_uascdc424688	homo_uascdc4217.lsm (cropped)	2.71	153.946	122.651
homo_uascdc42	homo_uascdc424689	homo_uascdc4217.lsm (cropped)	1.37	142.562	126.901
homo_uascdc42	homo_uascdc424693	homo_uascdc4217.lsm (cropped)	6.84	145.568	112.709
homo_uascdc42	homo_uascdc424695	homo_uascdc4217.lsm (cropped)	3.2	138.898	106.138
homo_uascdc42	homo_uascdc424696	homo_uascdc4217.lsm (cropped)	1.48	140.663	132.408
homo_uascdc42	homo_uascdc424697	homo_uascdc4217.lsm (cropped)	1.13	152.451	141.265
homo_uascdc42	homo_uascdc424699	homo_uascdc4217.lsm (cropped)	1.78	141.267	111.733
homo_uascdc42	homo_uascdc424701	homo_uascdc4217.lsm (cropped)	0.692	136.646	158.38
homo_uascdc42	homo_uascdc424703	homo_uascdc4217.lsm (cropped)	0.838	151.183	131.942
homo_uascdc42	homo_uascdc424704	homo_uascdc4217.lsm (cropped)	1.83	145.889	111.57
homo_uascdc42	homo_uascdc424706	homo_uascdc4217.lsm (cropped)	1.56	173.628	120.248
homo_uascdc42	homo_uascdc424707	homo_uascdc4217.lsm (cropped)	3.92	164.675	131.772
homo_uascdc42	homo_uascdc424708	homo_uascdc4217.lsm (cropped)	2.91	150.298	138.716
homo_uascdc42	homo_uascdc424709	homo_uascdc4217.lsm (cropped)	2.7	163.181	135.589
homo_uascdc42	homo_uascdc424711	homo_uascdc4217.lsm (cropped)	3.23	153.249	120.332
homo_uascdc42	homo_uascdc424713	homo_uascdc4217.lsm (cropped)	1.76	146.754	112.819
homo_uascdc42	homo_uascdc424714	homo_uascdc4217.lsm (cropped)	3.89	154.633	117.592
homo_uascdc42	homo_uascdc424715	homo_uascdc4217.lsm (cropped)	2.29	148.085	111.656
homo_uascdc42	homo_uascdc424716	homo_uascdc4217.lsm (cropped)	4.16	161.786	125.161
homo_uascdc42	homo_uascdc424717	homo_uascdc4217.lsm (cropped)	2.47	160.495	125.634
homo_uascdc42	homo_uascdc424718	homo_uascdc4217.lsm (cropped)	2.27	146.549	119.499
homo_uascdc42	homo_uascdc424719	homo_uascdc4217.lsm (cropped)	2.02	143.74	108.638
homo_uascdc42	homo_uascdc424721	homo_uascdc4217.lsm (cropped)	3.6	160.754	119.799
homo_uascdc42	homo_uascdc424722	homo_uascdc4217.lsm (cropped)	11.29	174.299	149.098
homo_uascdc42	homo_uascdc424724	homo_uascdc4217.lsm (cropped)	9.02	162.13	142.507
homo_uascdc42	homo_uascdc424725	homo_uascdc4217.lsm (cropped)	5.42	144.392	104.007
homo_uascdc42	homo_uascdc424726	homo_uascdc4217.lsm (cropped)	2.72	141.469	123.225
homo_uascdc42	homo_uascdc424727	homo_uascdc4217.lsm (cropped)	1.77	143.586	107.769
homo_uascdc42	homo_uascdc424728	homo_uascdc4217.lsm (cropped)	4.27	158.914	124.039
homo_uascdc42	homo_uascdc424729	homo_uascdc4217.lsm (cropped)	7.69	159.118	139.756
homo_uascdc42	homo_uascdc424731	homo_uascdc4217.lsm (cropped)	6.3	158.482	150.075
homo_uascdc42	homo_uascdc424733	homo_uascdc4217.lsm (cropped)	7.03	157.963	115.511
homo_uascdc42	homo_uascdc424734	homo_uascdc4217.lsm (cropped)	9.34	173.249	129.936
homo_uascdc42	homo_uascdc424735	homo_uascdc4217.lsm (cropped)	1.88	146.184	108.815
homo_uascdc42	homo_uascdc424736	homo_uascdc4217.lsm (cropped)	1.44	140.861	109.779
homo_uascdc42	homo_uascdc424737	homo_uascdc4217.lsm (cropped)	0.946	137.697	117.615
homo_uascdc42	homo_uascdc424738	homo_uascdc4217.lsm (cropped)	3.89	150.625	128.256
homo_uascdc42	homo_uascdc424740	homo_uascdc4217.lsm (cropped)	0.827	151.79	120.151
homo_uascdc42	homo_uascdc424743	homo_uascdc4217.lsm (cropped)	14.53	167.428	126.062
homo_uascdc42	homo_uascdc424744	homo_uascdc4217.lsm (cropped)	1.68	149.403	109.054
homo_uascdc42	homo_uascdc426886	homo_uascdc4222.lsm (cropped)	0.719	167.474	122.483
homo_uascdc42	homo_uascdc426887	homo_uascdc4222.lsm (cropped)	0.925	170.97	142.94
homo_uascdc42	homo_uascdc426888	homo_uascdc4222.lsm (cropped)	1.09	168.226	144.261
homo_uascdc42	homo_uascdc426889	homo_uascdc4222.lsm (cropped)	1.19	161.317	127.004
homo_uascdc42	homo_uascdc426890	homo_uascdc4222.lsm (cropped)	0.665	164.576	137.497
homo_uascdc42	homo_uascdc426891	homo_uascdc4222.lsm (cropped)	2.28	165.29	139.848
homo_uascdc42	homo_uascdc426892	homo_uascdc4222.lsm (cropped)	1.37	157.124	134.014
homo_uascdc42	homo_uascdc426893	homo_uascdc4222.lsm (cropped)	0.595	164.946	145.354
homo_uascdc42	homo_uascdc426894	homo_uascdc4222.lsm (cropped)	0.492	160.065	133.794
homo_uascdc42	homo_uascdc426895	homo_uascdc4222.lsm (cropped)	1.08	176.175	148.812
homo_uascdc42	homo_uascdc426896	homo_uascdc4222.lsm (cropped)	1.76	170.576	143.72
homo_uascdc42	homo_uascdc426897	homo_uascdc4222.lsm (cropped)	0.378	153.437	133.938
homo_uascdc42	homo_uascdc426898	homo_uascdc4222.lsm (cropped)	0.227	150.329	138.011
homo_uascdc42	homo_uascdc426899	homo_uascdc4222.lsm (cropped)	0.416	163.458	131.839
homo_uascdc42	homo_uascdc426901	homo_uascdc4222.lsm (cropped)	0.6	164.778	133.144
homo_uascdc42	homo_uascdc426902	homo_uascdc4222.lsm (cropped)	0.357	148.901	134.73
homo_uascdc42	homo_uascdc426905	homo_uascdc4222.lsm (cropped)	0.308	160.55	144.022
homo_uascdc42	homo_uascdc426906	homo_uascdc4222.lsm (cropped)	1.45	164.237	134.263
homo_uascdc42	homo_uascdc426907	homo_uascdc4222.lsm (cropped)	2.65	169.863	141.532
homo_uascdc42	homo_uascdc426908	homo_uascdc4222.lsm (cropped)	0.492	158.348	136.508
homo_uascdc42	homo_uascdc426909	homo_uascdc4222.lsm (cropped)	0.6	154.233	135.435
homo_uascdc42	homo_uascdc426910	homo_uascdc4222.lsm (cropped)	0.335	162.361	132.96
homo_uascdc42	homo_uascdc426911	homo_uascdc4222.lsm (cropped)	0.919	168.642	147.767
homo_uascdc42	homo_uascdc426914	homo_uascdc4222.lsm (cropped)	1.62	158.587	124.285
homo_uascdc42	homo_uascdc426915	homo_uascdc4222.lsm (cropped)	0.287	151.42	147.403
homo_uascdc42	homo_uascdc426917	homo_uascdc4222.lsm (cropped)	6.84	187.448	167.105
homo_uascdc42	homo_uascdc426918	homo_uascdc4222.lsm (cropped)	1.12	153.928	182.643
homo_uascdc42	homo_uascdc426920	homo_uascdc4222.lsm (cropped)	0.654	165.165	132.018
homo_uascdc42	homo_uascdc426921	homo_uascdc4222.lsm (cropped)	0.276	153.661	191.853
homo_uascdc42	homo_uascdc426923	homo_uascdc4222.lsm (cropped)	1.79	177.026	131.291
homo_uascdc42	homo_uascdc426924	homo_uascdc4222.lsm (cropped)	1.09	163.861	139.904
homo_uascdc42	homo_uascdc426926	homo_uascdc4222.lsm (cropped)	0.47	151.822	137.352
homo_uascdc42	homo_uascdc426927	homo_uascdc4222.lsm (cropped)	0.762	158.393	134.433
homo_uascdc42	homo_uascdc426929	homo_uascdc4222.lsm (cropped)	0.887	155.967	157.081
homo_uascdc42	homo_uascdc426930	homo_uascdc4222.lsm (cropped)	2.29	166.002	152.79
homo_uascdc42	homo_uascdc426933	homo_uascdc4222.lsm (cropped)	0.238	158.15	141.338
homo_uascdc42	homo_uascdc426935	homo_uascdc4222.lsm (cropped)	0.687	157.659	138.598
homo_uascdc42	homo_uascdc426937	homo_uascdc4222.lsm (cropped)	1.64	169.459	127.486
homo_uascdc42	homo_uascdc426938	homo_uascdc4222.lsm (cropped)	2.96	167.07	138.413
homo_uascdc42	homo_uascdc426939	homo_uascdc4222.lsm (cropped)	0.741	157.351	124.691
homo_uascdc42	homo_uascdc426942	homo_uascdc4222.lsm (cropped)	0.454	150.418	139.364
homo_uascdc42	homo_uascdc426943	homo_uascdc4222.lsm (cropped)	0.541	153.815	128.792
homo_uascdc42	homo_uascdc426945	homo_uascdc4222.lsm (cropped)	0.481	155.067	127.838
homo_uascdc42	homo_uascdc426947	homo_uascdc4222.lsm (cropped)	0.211	154.672	139.225
homo_uascdc42	homo_uascdc426948	homo_uascdc4222.lsm (cropped)	0.368	160.786	148.822
homo_uascdc42	homo_uascdc426949	homo_uascdc4222.lsm (cropped)	0.952	159.506	133.706
homo_uascdc42	homo_uascdc426951	homo_uascdc4222.lsm (cropped)	1.09	159.109	122.265
homo_uascdc42	homo_uascdc426952	homo_uascdc4222.lsm (cropped)	1.88	162.385	125.778
homo_uascdc42	homo_uascdc426953	homo_uascdc4222.lsm (cropped)	1.38	158.727	132.02
homo_uascdc42	homo_uascdc426954	homo_uascdc4222.lsm (cropped)	0.892	162.545	127.889
homo_uascdc42	homo_uascdc426955	homo_uascdc4222.lsm (cropped)	1.03	158.193	130.764
homo_uascdc42	homo_uascdc426956	homo_uascdc4222.lsm (cropped)	1.16	156.393	125.329
homo_uascdc42	homo_uascdc426958	homo_uascdc4222.lsm (cropped)	0.611	166.112	127.412
homo_uascdc42	homo_uascdc426959	homo_uascdc4222.lsm (cropped)	1.32	165.289	122.549
homo_uascdc42	homo_uascdc426961	homo_uascdc4222.lsm (cropped)	2.4	163.16	126.338
homo_uascdc42	homo_uascdc426963	homo_uascdc4222.lsm (cropped)	0.589	172.336	142.481
homo_uascdc42	homo_uascdc426964	homo_uascdc4222.lsm (cropped)	1.51	170.103	127.782
homo_uascdc42	homo_uascdc426965	homo_uascdc4222.lsm (cropped)	1.31	164.898	131.771
homo_uascdc42	homo_uascdc426966	homo_uascdc4222.lsm (cropped)	1.44	162.214	128.503
homo_uascdc42	homo_uascdc426972	homo_uascdc4222.lsm (cropped)	0.292	156.999	127.392
homo_uascdc42	homo_uascdc426974	homo_uascdc4222.lsm (cropped)	0.795	159.082	136.727
homo_uascdc42	homo_uascdc426975	homo_uascdc4222.lsm (cropped)	0.735	155.254	125.828
homo_uascdc42	homo_uascdc426978	homo_uascdc4222.lsm (cropped)	0.249	146.09	133.282
homo_uascdc42	homo_uascdc426980	homo_uascdc4222.lsm (cropped)	0.514	168.159	136.52
homo_uascdc42	homo_uascdc426981	homo_uascdc4222.lsm (cropped)	1.37	159.806	128.709
homo_uascdc42	homo_uascdc426982	homo_uascdc4222.lsm (cropped)	2.37	160.592	126.314
homo_uascdc42	homo_uascdc426983	homo_uascdc4222.lsm (cropped)	1.56	163.966	143.445
homo_uascdc42	homo_uascdc426984	homo_uascdc4222.lsm (cropped)	0.692	149.777	129.169
homo_uascdc42	homo_uascdc426985	homo_uascdc4222.lsm (cropped)	1.65	158.643	115.381
homo_uascdc42	homo_uascdc426987	homo_uascdc4222.lsm (cropped)	0.752	161.194	132.921
homo_uascdc42	homo_uascdc426988	homo_uascdc4222.lsm (cropped)	2.1	161.147	162.122
homo_uascdc42	homo_uascdc426990	homo_uascdc4222.lsm (cropped)	1.1	153.705	129.492
homo_uascdc42	homo_uascdc426991	homo_uascdc4222.lsm (cropped)	1.4	166.766	134.241
homo_uascdc42	homo_uascdc426993	homo_uascdc4222.lsm (cropped)	0.487	170.535	128.442
homo_uascdc42	homo_uascdc426994	homo_uascdc4222.lsm (cropped)	1.15	159.399	131.335
homo_uascdc42	homo_uascdc426995	homo_uascdc4222.lsm (cropped)	1.35	158.709	134.881
homo_uascdc42	homo_uascdc426996	homo_uascdc4222.lsm (cropped)	2.12	161.253	158.97
homo_uascdc42	homo_uascdc427000	homo_uascdc4222.lsm (cropped)	1.99	164.006	130.408
homo_uascdc42	homo_uascdc427001	homo_uascdc4222.lsm (cropped)	1.7	161.979	132.68
homo_uascdc42	homo_uascdc427002	homo_uascdc4222.lsm (cropped)	1.12	170.769	138.301
homo_uascdc42	homo_uascdc427003	homo_uascdc4222.lsm (cropped)	0.67	161.276	123.965
homo_uascdc42	homo_uascdc427004	homo_uascdc4222.lsm (cropped)	1.39	157.372	128.191
homo_uascdc42	homo_uascdc427005	homo_uascdc4222.lsm (cropped)	4.04	175.865	138.674
homo_uascdc42	homo_uascdc427006	homo_uascdc4222.lsm (cropped)	5.23	163.808	126.042
homo_uascdc42	homo_uascdc427012	homo_uascdc4222.lsm (cropped)	2.93	163.361	140.795
homo_uascdc42	homo_uascdc427015	homo_uascdc4222.lsm (cropped)	3.9	169.234	141.409
homo_uascdc42	homo_uascdc427016	homo_uascdc4222.lsm (cropped)	1.37	161.704	132.639
homo_uascdc42	homo_uascdc427019	homo_uascdc4222.lsm (cropped)	1.83	166.618	131.659
homo_uascdc42	homo_uascdc427020	homo_uascdc4222.lsm (cropped)	5.43	186.713	167.166
homo_uascdc42	homo_uascdc427026	homo_uascdc4222.lsm (cropped)	1.42	162.06	137.31
homo_uascdc42	homo_uascdc427027	homo_uascdc4222.lsm (cropped)	2.15	163.085	134.114
homo_uascdc42	homo_uascdc427029	homo_uascdc4222.lsm (cropped)	2.56	165.053	151.858
homo_uascdc42	homo_uascdc427030	homo_uascdc4222.lsm (cropped)	0.449	157.161	145.997
homo_uascdc42	homo_uascdc427031	homo_uascdc4222.lsm (cropped)	5.23	181.83	143.445
homo_uascdc42	homo_uascdc427032	homo_uascdc4222.lsm (cropped)	1.22	155.501	125.868
homo_uascdc42	homo_uascdc427033	homo_uascdc4222.lsm (cropped)	1.54	166.13	135.369
homo_uascdc42	homo_uascdc427034	homo_uascdc4222.lsm (cropped)	2.36	166.609	121.764
homo_uascdc42	homo_uascdc427035	homo_uascdc4222.lsm (cropped)	2.24	158.226	122.079
homo_uascdc42	homo_uascdc427038	homo_uascdc4222.lsm (cropped)	1.3	150.564	126.258
homo_uascdc42	homo_uascdc427042	homo_uascdc4222.lsm (cropped)	1.44	152.638	122.227
homo_uascdc42	homo_uascdc427043	homo_uascdc4222.lsm (cropped)	1.55	162.652	148.19
homo_uascdc42	homo_uascdc427045	homo_uascdc4222.lsm (cropped)	1.5	157.013	120.754
homo_uascdc42	homo_uascdc427046	homo_uascdc4222.lsm (cropped)	1.82	164.514	135.66
homo_uascdc42	homo_uascdc427047	homo_uascdc4222.lsm (cropped)	3.04	156.825	121.84
homo_uascdc42	homo_uascdc427049	homo_uascdc4222.lsm (cropped)	1.25	157.332	121.606
homo_uascdc42	homo_uascdc427050	homo_uascdc4222.lsm (cropped)	2.88	169.007	148.311
homo_uascdc42	homo_uascdc427052	homo_uascdc4222.lsm (cropped)	2.44	160.154	131.507
homo_uascdc42	homo_uascdc427053	homo_uascdc4222.lsm (cropped)	1.22	156.308	129.776
homo_uascdc42	homo_uascdc427054	homo_uascdc4222.lsm (cropped)	0.649	158.402	128.786
homo_uascdc42	homo_uascdc427057	homo_uascdc4222.lsm (cropped)	0.816	155.507	139.123
homo_uascdc42	homo_uascdc427058	homo_uascdc4222.lsm (cropped)	0.562	149.974	134.991
homo_uascdc42	homo_uascdc427059	homo_uascdc4222.lsm (cropped)	1.34	173.493	151.536
homo_uascdc42	homo_uascdc427060	homo_uascdc4222.lsm (cropped)	0.6	151.9	151.376
homo_uascdc42	homo_uascdc427061	homo_uascdc4222.lsm (cropped)	1.29	161.037	120.492
homo_uascdc42	homo_uascdc427062	homo_uascdc4222.lsm (cropped)	0.914	152.047	123.668
homo_uascdc42	homo_uascdc427063	homo_uascdc4222.lsm (cropped)	0.676	153.104	146.414
homo_uascdc42	homo_uascdc427064	homo_uascdc4222.lsm (cropped)	1.27	154.301	147.435
homo_uascdc42	homo_uascdc427067	homo_uascdc4222.lsm (cropped)	0.816	152.177	129.199
homo_uascdc42	homo_uascdc427069	homo_uascdc4222.lsm (cropped)	2.24	163.115	134.159
homo_uascdc42	homo_uascdc427070	homo_uascdc4222.lsm (cropped)	0.957	158.753	160.807
homo_uascdc42	homo_uascdc427071	homo_uascdc4222.lsm (cropped)	0.254	146.868	138.325
homo_uascdc42	homo_uascdc427072	homo_uascdc4222.lsm (cropped)	0.465	157.41	129.821
homo_uascdc42	homo_uascdc427075	homo_uascdc4222.lsm (cropped)	0.708	154.313	145.578
homo_uascdc42	homo_uascdc427076	homo_uascdc4222.lsm (cropped)	0.995	153.62	127.399
homo_uascdc42	homo_uascdc427078	homo_uascdc4222.lsm (cropped)	1.54	165.615	173.237
homo_uascdc42	homo_uascdc427079	homo_uascdc4222.lsm (cropped)	1.16	168.165	128.745
homo_uascdc42	homo_uascdc427081	homo_uascdc4222.lsm (cropped)	0.681	158.659	130.249
homo_uascdc42	homo_uascdc427082	homo_uascdc4222.lsm (cropped)	1.27	166.398	131.487
homo_uascdc42	homo_uascdc427083	homo_uascdc4222.lsm (cropped)	3.28	172.537	135.501
homo_uascdc42	homo_uascdc427084	homo_uascdc4222.lsm (cropped)	1.93	157.106	131.893
homo_uascdc42	homo_uascdc427085	homo_uascdc4222.lsm (cropped)	0.606	150.108	123.238
homo_uascdc42	homo_uascdc427086	homo_uascdc4222.lsm (cropped)	0.854	155.84	126.366
homo_uascdc42	homo_uascdc427089	homo_uascdc4222.lsm (cropped)	1.06	153.427	147.278
homo_uascdc42	homo_uascdc427093	homo_uascdc4222.lsm (cropped)	2.06	152.233	138.807
homo_uascdc42	homo_uascdc427094	homo_uascdc4222.lsm (cropped)	13.28	177.867	145.979
homo_uascdc42	homo_uascdc427095	homo_uascdc4222.lsm (cropped)	1.7	153.919	121.781
homo_uascdc42	homo_uascdc427096	homo_uascdc4222.lsm (cropped)	1.38	159.251	126.506
homo_uascdc42	homo_uascdc427099	homo_uascdc4222.lsm (cropped)	1.72	165.37	122.571
homo_uascdc42	homo_uascdc427101	homo_uascdc4222.lsm (cropped)	1.12	160.017	124.172
homo_uascdc42	homo_uascdc427102	homo_uascdc4222.lsm (cropped)	0.8	152.39	126.412
homo_uascdc42	homo_uascdc427104	homo_uascdc4222.lsm (cropped)	1.61	161.89	178.927
homo_uascdc42	homo_uascdc427106	homo_uascdc4222.lsm (cropped)	0.46	153.75	140.227
homo_uascdc42	homo_uascdc427107	homo_uascdc4222.lsm (cropped)	2.25	159.077	128.426
homo_uascdc42	homo_uascdc427109	homo_uascdc4222.lsm (cropped)	0.319	148.68	137.443
homo_uascdc42	homo_uascdc427110	homo_uascdc4222.lsm (cropped)	0.968	154.356	123.334
homo_uascdc42	homo_uascdc427112	homo_uascdc4222.lsm (cropped)	1.78	167.738	129.246
homo_uascdc42	homo_uascdc427113	homo_uascdc4222.lsm (cropped)	2.83	161.524	125.827
homo_uascdc42	homo_uascdc427114	homo_uascdc4222.lsm (cropped)	1.18	162.135	129.712
homo_uascdc42	homo_uascdc427116	homo_uascdc4222.lsm (cropped)	0.568	164.81	133.297
homo_uascdc42	homo_uascdc427117	homo_uascdc4222.lsm (cropped)	3.27	173.238	144.378
homo_uascdc42	homo_uascdc427118	homo_uascdc4222.lsm (cropped)	3.93	165.466	142.933
homo_uascdc42	homo_uascdc427119	homo_uascdc4222.lsm (cropped)	2.82	166.813	131.391
homo_uascdc42	homo_uascdc427121	homo_uascdc4222.lsm (cropped)	1.62	153.744	126.063
homo_uascdc42	homo_uascdc427122	homo_uascdc4222.lsm (cropped)	1.09	168.152	125.646
homo_uascdc42	homo_uascdc427123	homo_uascdc4222.lsm (cropped)	1.05	160.855	130.33
homo_uascdc42	homo_uascdc427125	homo_uascdc4222.lsm (cropped)	2.94	174.951	166.742
homo_uascdc42	homo_uascdc427127	homo_uascdc4222.lsm (cropped)	0.908	155.357	130.256
homo_uascdc42	homo_uascdc427128	homo_uascdc4222.lsm (cropped)	2.21	156.161	137.772
homo_uascdc42	homo_uascdc427129	homo_uascdc4222.lsm (cropped)	1.92	158.908	125.788
homo_uascdc42	homo_uascdc427131	homo_uascdc4222.lsm (cropped)	2.14	156.311	123.83
homo_uascdc42	homo_uascdc427132	homo_uascdc4222.lsm (cropped)	1.11	164.458	136.541
homo_uascdc42	homo_uascdc427133	homo_uascdc4222.lsm (cropped)	3.77	166.388	130.455
homo_uascdc42	homo_uascdc427134	homo_uascdc4222.lsm (cropped)	1.96	154.453	122.918
homo_uascdc42	homo_uascdc427135	homo_uascdc4222.lsm (cropped)	0.806	156.133	147.806
homo_uascdc42	homo_uascdc427136	homo_uascdc4222.lsm (cropped)	5.46	176.543	142.893
homo_uascdc42	homo_uascdc427137	homo_uascdc4222.lsm (cropped)	3.95	158.861	124.092
homo_uascdc42	homo_uascdc427140	homo_uascdc4222.lsm (cropped)	0.903	153.763	121.769
homo_uascdc42	homo_uascdc427141	homo_uascdc4222.lsm (cropped)	0.833	159.075	191.334
homo_uascdc42	homo_uascdc427142	homo_uascdc4222.lsm (cropped)	3.96	164.261	124.27
homo_uascdc42	homo_uascdc427143	homo_uascdc4222.lsm (cropped)	6.04	173.721	144.949
homo_uascdc42	homo_uascdc427144	homo_uascdc4222.lsm (cropped)	1.95	164.812	132.183
homo_uascdc42	homo_uascdc427147	homo_uascdc4222.lsm (cropped)	1.1	155.45	123.331
homo_uascdc42	homo_uascdc427148	homo_uascdc4222.lsm (cropped)	0.827	162.502	159.723
homo_uascdc42	homo_uascdc427149	homo_uascdc4222.lsm (cropped)	4.42	166.347	137.341
homo_uascdc42	homo_uascdc427151	homo_uascdc4222.lsm (cropped)	8.79	173.132	138.666
homo_uascdc42	homo_uascdc427152	homo_uascdc4222.lsm (cropped)	1.14	155.157	135.083
homo_uascdc42	homo_uascdc427153	homo_uascdc4222.lsm (cropped)	1.59	154.3	122.167
homo_uascdc42	homo_uascdc427156	homo_uascdc4222.lsm (cropped)	2.09	161.289	131.161
homo_uascdc42	homo_uascdc427157	homo_uascdc4222.lsm (cropped)	2.42	158.792	129.986
homo_uascdc42	homo_uascdc427158	homo_uascdc4222.lsm (cropped)	9.07	176.797	134.657
homo_uascdc42	homo_uascdc427159	homo_uascdc4222.lsm (cropped)	6.08	162.36	135.961
homo_uascdc42	homo_uascdc427160	homo_uascdc4222.lsm (cropped)	2.98	156.699	126.048
homo_uascdc42	homo_uascdc427161	homo_uascdc4222.lsm (cropped)	19.42	186.136	154.28
homo_uascdc42	homo_uascdc427162	homo_uascdc4222.lsm (cropped)	2.68	162.723	125.664
homo_uascdc42	homo_uascdc427163	homo_uascdc4222.lsm (cropped)	8.51	164.803	128.697
homo_uascdc42	homo_uascdc427164	homo_uascdc4222.lsm (cropped)	4.23	164.893	124.495
homo_uascdc42	homo_uascdc427166	homo_uascdc4222.lsm (cropped)	2.12	159.256	134.348
homo_uascdc42	homo_uascdc427167	homo_uascdc4222.lsm (cropped)	5.96	174.984	141.675
homo_uascdc42	homo_uascdc427169	homo_uascdc4222.lsm (cropped)	0.989	161.945	150.298
homo_uascdc42	homo_uascdc427170	homo_uascdc4222.lsm (cropped)	1.04	168.627	140.085
homo_uascdc42	homo_uascdc427171	homo_uascdc4222.lsm (cropped)	1.42	168.757	144.497
homo_uascdc42	homo_uascdc427172	homo_uascdc4222.lsm (cropped)	1.44	172.268	141.782
homo_uascdc42	homo_uascdc427173	homo_uascdc4222.lsm (cropped)	12.08	179.705	144.831
homo_uascdc42	homo_uascdc427174	homo_uascdc4222.lsm (cropped)	3.28	174.853	159.505
homo_uascdc42	homo_uascdc427175	homo_uascdc4222.lsm (cropped)	2.62	163.56	135.799
homo_uascdc42	homo_uascdc427176	homo_uascdc4222.lsm (cropped)	2.67	167.377	137.702
homo_uascdc42	homo_uascdc427178	homo_uascdc4222.lsm (cropped)	6.61	177.85	153.161
homo_uascdc42	homo_uascdc427179	homo_uascdc4222.lsm (cropped)	2.99	179.516	135.568
homo_uascdc42	homo_uascdc427180	homo_uascdc4222.lsm (cropped)	2.17	165.78	124.212
homo_uascdc42	homo_uascdc427181	homo_uascdc4222.lsm (cropped)	0.87	163.301	134.666
homo_uascdc42	homo_uascdc427182	homo_uascdc4222.lsm (cropped)	1.1	159.417	130.356
homo_uascdc42	homo_uascdc427183	homo_uascdc4222.lsm (cropped)	0.627	160.41	141.098
homo_uascdc42	homo_uascdc427184	homo_uascdc4222.lsm (cropped)	3.24	171.124	134.072
homo_uascdc42	homo_uascdc427186	homo_uascdc4222.lsm (cropped)	2.43	165.948	124.889
homo_uascdc42	homo_uascdc427187	homo_uascdc4222.lsm (cropped)	1.42	158.202	124.173
homo_uascdc42	homo_uascdc427188	homo_uascdc4222.lsm (cropped)	1.16	157.132	120.766
homo_uascdc42	homo_uascdc427190	homo_uascdc4222.lsm (cropped)	0.946	157.224	132.923
homo_uascdc42	homo_uascdc427192	homo_uascdc4222.lsm (cropped)	1.49	156.323	129.882
homo_uascdc42	homo_uascdc427194	homo_uascdc4222.lsm (cropped)	3.05	167.219	131.619
homo_uascdc42	homo_uascdc427197	homo_uascdc4222.lsm (cropped)	0.665	157.596	120.437
homo_uascdc42	homo_uascdc427198	homo_uascdc4222.lsm (cropped)	1.17	158.732	123.966
homo_uascdc42	homo_uascdc427199	homo_uascdc4222.lsm (cropped)	0.27	150.188	140.191
homo_uascdc42	homo_uascdc427201	homo_uascdc4222.lsm (cropped)	0.406	156.306	129.898
homo_uascdc42	homo_uascdc427203	homo_uascdc4222.lsm (cropped)	1.04	158.99	122.994
homo_uascdc42	homo_uascdc427208	homo_uascdc4222.lsm (cropped)	3.72	168.126	141.243
homo_uascdc42	homo_uascdc4210012	homo_uascdc4224.lsm (cropped)	0.735	190.814	181.697
homo_uascdc42	homo_uascdc4210013	homo_uascdc4224.lsm (cropped)	0.53	182.45	152.625
homo_uascdc42	homo_uascdc4210014	homo_uascdc4224.lsm (cropped)	0.752	172.181	139.313
homo_uascdc42	homo_uascdc4210015	homo_uascdc4224.lsm (cropped)	0.908	182.241	171.367
homo_uascdc42	homo_uascdc4210018	homo_uascdc4224.lsm (cropped)	0.249	168.15	147.059
homo_uascdc42	homo_uascdc4210019	homo_uascdc4224.lsm (cropped)	0.541	175.946	158.208
homo_uascdc42	homo_uascdc4210020	homo_uascdc4224.lsm (cropped)	0.876	176.905	154.619
homo_uascdc42	homo_uascdc4210021	homo_uascdc4224.lsm (cropped)	1.52	179.007	163.403
homo_uascdc42	homo_uascdc4210022	homo_uascdc4224.lsm (cropped)	4.67	178.375	169.475
homo_uascdc42	homo_uascdc4210023	homo_uascdc4224.lsm (cropped)	0.254	168.03	152.025
homo_uascdc42	homo_uascdc4210024	homo_uascdc4224.lsm (cropped)	0.762	168.843	130.228
homo_uascdc42	homo_uascdc4210025	homo_uascdc4224.lsm (cropped)	4.53	191.134	170.238
homo_uascdc42	homo_uascdc4210026	homo_uascdc4224.lsm (cropped)	0.46	182.476	155.164
homo_uascdc42	homo_uascdc4210027	homo_uascdc4224.lsm (cropped)	0.406	184.025	155.705
homo_uascdc42	homo_uascdc4210028	homo_uascdc4224.lsm (cropped)	1.32	188.493	171.897
homo_uascdc42	homo_uascdc4210029	homo_uascdc4224.lsm (cropped)	0.649	165.981	140.653
homo_uascdc42	homo_uascdc4210030	homo_uascdc4224.lsm (cropped)	0.589	183.009	156.258
homo_uascdc42	homo_uascdc4210031	homo_uascdc4224.lsm (cropped)	2.62	181.09	144.028
homo_uascdc42	homo_uascdc4210032	homo_uascdc4224.lsm (cropped)	0.222	159.564	152.194
homo_uascdc42	homo_uascdc4210033	homo_uascdc4224.lsm (cropped)	0.773	179.06	157.477
homo_uascdc42	homo_uascdc4210035	homo_uascdc4224.lsm (cropped)	0.314	170.014	144.809
homo_uascdc42	homo_uascdc4210036	homo_uascdc4224.lsm (cropped)	1.21	179.701	159.806
homo_uascdc42	homo_uascdc4210037	homo_uascdc4224.lsm (cropped)	1.45	178.388	144.401
homo_uascdc42	homo_uascdc4210038	homo_uascdc4224.lsm (cropped)	2.04	181.122	156.424
homo_uascdc42	homo_uascdc4210039	homo_uascdc4224.lsm (cropped)	0.454	179.389	170.599
homo_uascdc42	homo_uascdc4210040	homo_uascdc4224.lsm (cropped)	0.946	181.34	189.237
homo_uascdc42	homo_uascdc4210041	homo_uascdc4224.lsm (cropped)	3.9	189.98	183.405
homo_uascdc42	homo_uascdc4210042	homo_uascdc4224.lsm (cropped)	1.41	181.637	156.124
homo_uascdc42	homo_uascdc4210043	homo_uascdc4224.lsm (cropped)	1.29	185.182	146.949
homo_uascdc42	homo_uascdc4210044	homo_uascdc4224.lsm (cropped)	0.573	176.814	159.664
homo_uascdc42	homo_uascdc4210045	homo_uascdc4224.lsm (cropped)	1.05	167.06	138.395
homo_uascdc42	homo_uascdc4210046	homo_uascdc4224.lsm (cropped)	2.15	194.275	164.032
homo_uascdc42	homo_uascdc4210047	homo_uascdc4224.lsm (cropped)	0.211	161.291	166.554
homo_uascdc42	homo_uascdc4210048	homo_uascdc4224.lsm (cropped)	0.33	171.029	135.849
homo_uascdc42	homo_uascdc4210051	homo_uascdc4224.lsm (cropped)	0.622	178.129	147.408
homo_uascdc42	homo_uascdc4210052	homo_uascdc4224.lsm (cropped)	2.32	189.398	168.016
homo_uascdc42	homo_uascdc4210053	homo_uascdc4224.lsm (cropped)	0.865	183.039	153.98
homo_uascdc42	homo_uascdc4210054	homo_uascdc4224.lsm (cropped)	0.341	181.061	153.78
homo_uascdc42	homo_uascdc4210056	homo_uascdc4224.lsm (cropped)	5.14	205.754	170.273
homo_uascdc42	homo_uascdc4210058	homo_uascdc4224.lsm (cropped)	1.36	177.896	152.967
homo_uascdc42	homo_uascdc4210059	homo_uascdc4224.lsm (cropped)	0.314	161.039	146.183
homo_uascdc42	homo_uascdc4210060	homo_uascdc4224.lsm (cropped)	1.24	176.758	139.698
homo_uascdc42	homo_uascdc4210062	homo_uascdc4224.lsm (cropped)	2.2	182.251	158.127
homo_uascdc42	homo_uascdc4210063	homo_uascdc4224.lsm (cropped)	0.346	166.321	164.293
homo_uascdc42	homo_uascdc4210064	homo_uascdc4224.lsm (cropped)	1.02	199.239	173.422
homo_uascdc42	homo_uascdc4210065	homo_uascdc4224.lsm (cropped)	4.97	201.087	172.336
homo_uascdc42	homo_uascdc4210067	homo_uascdc4224.lsm (cropped)	0.503	162.722	145.436
homo_uascdc42	homo_uascdc4210068	homo_uascdc4224.lsm (cropped)	7.49	206.001	180.82
homo_uascdc42	homo_uascdc4210070	homo_uascdc4224.lsm (cropped)	2.18	181.245	165.926
homo_uascdc42	homo_uascdc4210071	homo_uascdc4224.lsm (cropped)	0.335	172.95	152.693
homo_uascdc42	homo_uascdc4210072	homo_uascdc4224.lsm (cropped)	0.433	165.952	151.268
homo_uascdc42	homo_uascdc4210073	homo_uascdc4224.lsm (cropped)	1.42	174.259	145.373
homo_uascdc42	homo_uascdc4210075	homo_uascdc4224.lsm (cropped)	1	199.825	160.722
homo_uascdc42	homo_uascdc4210076	homo_uascdc4224.lsm (cropped)	4.29	191.556	169.036
homo_uascdc42	homo_uascdc4210077	homo_uascdc4224.lsm (cropped)	0.952	181.087	146.53
homo_uascdc42	homo_uascdc4210079	homo_uascdc4224.lsm (cropped)	0.881	165.052	145.845
homo_uascdc42	homo_uascdc4210080	homo_uascdc4224.lsm (cropped)	1.05	171.806	181.066
homo_uascdc42	homo_uascdc4210085	homo_uascdc4224.lsm (cropped)	1.17	173.882	145.566
homo_uascdc42	homo_uascdc4210087	homo_uascdc4224.lsm (cropped)	0.287	169.032	152.655
homo_uascdc42	homo_uascdc4210089	homo_uascdc4224.lsm (cropped)	3.03	194.857	169.854
homo_uascdc42	homo_uascdc4210090	homo_uascdc4224.lsm (cropped)	1.4	194.998	155.4
homo_uascdc42	homo_uascdc4210091	homo_uascdc4224.lsm (cropped)	0.357	165.719	142.342
homo_uascdc42	homo_uascdc4210092	homo_uascdc4224.lsm (cropped)	1.09	177.52	158.815
homo_uascdc42	homo_uascdc4210094	homo_uascdc4224.lsm (cropped)	0.406	166.008	155.297
homo_uascdc42	homo_uascdc4210095	homo_uascdc4224.lsm (cropped)	2.11	182.417	157.83
homo_uascdc42	homo_uascdc4210097	homo_uascdc4224.lsm (cropped)	0.535	183.842	155.453
homo_uascdc42	homo_uascdc4210098	homo_uascdc4224.lsm (cropped)	0.622	172.079	156.931
homo_uascdc42	homo_uascdc4210099	homo_uascdc4224.lsm (cropped)	1.15	176.299	141.698
homo_uascdc42	homo_uascdc4210100	homo_uascdc4224.lsm (cropped)	0.584	174.295	155.048
homo_uascdc42	homo_uascdc4210101	homo_uascdc4224.lsm (cropped)	0.519	167.106	145.412
homo_uascdc42	homo_uascdc4210102	homo_uascdc4224.lsm (cropped)	0.881	168.64	135.119
homo_uascdc42	homo_uascdc4210103	homo_uascdc4224.lsm (cropped)	2.78	182.804	155.612
homo_uascdc42	homo_uascdc4210105	homo_uascdc4224.lsm (cropped)	0.541	161.457	143.819
homo_uascdc42	homo_uascdc4210106	homo_uascdc4224.lsm (cropped)	0.93	169.831	148.664
homo_uascdc42	homo_uascdc4210107	homo_uascdc4224.lsm (cropped)	2.89	174.777	153.148
homo_uascdc42	homo_uascdc4210108	homo_uascdc4224.lsm (cropped)	0.892	187.189	160.301
homo_uascdc42	homo_uascdc4210109	homo_uascdc4224.lsm (cropped)	0.941	188.82	160.752
homo_uascdc42	homo_uascdc4210111	homo_uascdc4224.lsm (cropped)	0.26	170.903	216.823
homo_uascdc42	homo_uascdc4210112	homo_uascdc4224.lsm (cropped)	0.687	183.436	161.566
homo_uascdc42	homo_uascdc4210113	homo_uascdc4224.lsm (cropped)	0.595	175.546	143.925
homo_uascdc42	homo_uascdc4210114	homo_uascdc4224.lsm (cropped)	4.74	194.417	171.754
homo_uascdc42	homo_uascdc4210115	homo_uascdc4224.lsm (cropped)	0.378	161.122	162.245
homo_uascdc42	homo_uascdc4210116	homo_uascdc4224.lsm (cropped)	0.411	170.932	143.137
homo_uascdc42	homo_uascdc4210117	homo_uascdc4224.lsm (cropped)	0.633	170.397	153.347
homo_uascdc42	homo_uascdc4210118	homo_uascdc4224.lsm (cropped)	0.427	166.312	142.476
homo_uascdc42	homo_uascdc4210119	homo_uascdc4224.lsm (cropped)	0.606	165.259	146.625
homo_uascdc42	homo_uascdc4210120	homo_uascdc4224.lsm (cropped)	1.17	178.009	157.758
homo_uascdc42	homo_uascdc4210121	homo_uascdc4224.lsm (cropped)	0.276	165.98	160.561
homo_uascdc42	homo_uascdc4210122	homo_uascdc4224.lsm (cropped)	0.935	188.13	173.223
homo_uascdc42	homo_uascdc4210123	homo_uascdc4224.lsm (cropped)	1.65	198.971	168.213
homo_uascdc42	homo_uascdc4210124	homo_uascdc4224.lsm (cropped)	1.01	165.105	132.443
homo_uascdc42	homo_uascdc4210125	homo_uascdc4224.lsm (cropped)	2.17	183.472	151.592
homo_uascdc42	homo_uascdc4210126	homo_uascdc4224.lsm (cropped)	0.941	173.61	149.03
homo_uascdc42	homo_uascdc4210127	homo_uascdc4224.lsm (cropped)	2.15	190.24	159.755
homo_uascdc42	homo_uascdc4210129	homo_uascdc4224.lsm (cropped)	0.303	170.852	146.574
homo_uascdc42	homo_uascdc4210131	homo_uascdc4224.lsm (cropped)	0.508	163.398	155.321
homo_uascdc42	homo_uascdc4210132	homo_uascdc4224.lsm (cropped)	0.416	183.143	152.336
homo_uascdc42	homo_uascdc4210134	homo_uascdc4224.lsm (cropped)	0.357	163.794	150.837
homo_uascdc42	homo_uascdc4210135	homo_uascdc4224.lsm (cropped)	0.995	182.334	153.278
homo_uascdc42	homo_uascdc4210136	homo_uascdc4224.lsm (cropped)	0.351	172.731	156.014
homo_uascdc42	homo_uascdc4210137	homo_uascdc4224.lsm (cropped)	1.47	175.649	153.932
homo_uascdc42	homo_uascdc4210138	homo_uascdc4224.lsm (cropped)	2.27	183.664	154.224
homo_uascdc42	homo_uascdc4210139	homo_uascdc4224.lsm (cropped)	0.287	159.106	214.902
homo_uascdc42	homo_uascdc4210144	homo_uascdc4224.lsm (cropped)	1.14	168.275	163.821
homo_uascdc42	homo_uascdc4210146	homo_uascdc4224.lsm (cropped)	0.314	171.036	158.16
homo_uascdc42	homo_uascdc4210147	homo_uascdc4224.lsm (cropped)	2.23	174.328	147.108
homo_uascdc42	homo_uascdc4210148	homo_uascdc4224.lsm (cropped)	1.19	163.359	145.579
homo_uascdc42	homo_uascdc4210149	homo_uascdc4224.lsm (cropped)	2.99	184.572	159.035
homo_uascdc42	homo_uascdc4210150	homo_uascdc4224.lsm (cropped)	0.297	164.234	153.401
homo_uascdc42	homo_uascdc4210152	homo_uascdc4224.lsm (cropped)	1.04	188.378	168.377
homo_uascdc42	homo_uascdc4210153	homo_uascdc4224.lsm (cropped)	2.06	184.643	164.442
homo_uascdc42	homo_uascdc4210154	homo_uascdc4224.lsm (cropped)	0.606	170.807	149.102
homo_uascdc42	homo_uascdc4210155	homo_uascdc4224.lsm (cropped)	0.281	175.316	155.245
homo_uascdc42	homo_uascdc4210156	homo_uascdc4224.lsm (cropped)	0.297	160.284	132
homo_uascdc42	homo_uascdc4210157	homo_uascdc4224.lsm (cropped)	0.73	169.421	180.516
homo_uascdc42	homo_uascdc4210158	homo_uascdc4224.lsm (cropped)	2.06	183.145	164.894
homo_uascdc42	homo_uascdc4210159	homo_uascdc4224.lsm (cropped)	6.95	205.011	181.866
homo_uascdc42	homo_uascdc4210161	homo_uascdc4224.lsm (cropped)	4.61	187.666	162.668
homo_uascdc42	homo_uascdc4210162	homo_uascdc4224.lsm (cropped)	2.83	182.271	155.271
homo_uascdc42	homo_uascdc4210163	homo_uascdc4224.lsm (cropped)	0.741	172.19	136.237
homo_uascdc42	homo_uascdc4210164	homo_uascdc4224.lsm (cropped)	4.27	171.657	154.721
homo_uascdc42	homo_uascdc4210166	homo_uascdc4224.lsm (cropped)	1.77	178.049	147.591
homo_uascdc42	homo_uascdc4210169	homo_uascdc4224.lsm (cropped)	2.01	183.997	161.913
homo_uascdc42	homo_uascdc4210170	homo_uascdc4224.lsm (cropped)	1.23	169.808	142.631
homo_uascdc42	homo_uascdc4210171	homo_uascdc4224.lsm (cropped)	0.211	159.62	152.852
homo_uascdc42	homo_uascdc4210172	homo_uascdc4224.lsm (cropped)	0.519	164.309	149.306
homo_uascdc42	homo_uascdc4210173	homo_uascdc4224.lsm (cropped)	1.24	186.327	160.073
homo_uascdc42	homo_uascdc4210176	homo_uascdc4224.lsm (cropped)	0.53	163.074	147.252
homo_uascdc42	homo_uascdc4210177	homo_uascdc4224.lsm (cropped)	0.854	165.133	142.339
homo_uascdc42	homo_uascdc4210178	homo_uascdc4224.lsm (cropped)	0.335	158.126	189.933
homo_uascdc42	homo_uascdc4210179	homo_uascdc4224.lsm (cropped)	0.503	181.715	148.356
homo_uascdc42	homo_uascdc4210180	homo_uascdc4224.lsm (cropped)	0.308	160.835	139.432
homo_uascdc42	homo_uascdc4210182	homo_uascdc4224.lsm (cropped)	1.45	174.737	166.851
homo_uascdc42	homo_uascdc4210183	homo_uascdc4224.lsm (cropped)	1.95	174.057	152.254
homo_uascdc42	homo_uascdc4210184	homo_uascdc4224.lsm (cropped)	0.887	167.579	145.618
homo_uascdc42	homo_uascdc4210185	homo_uascdc4224.lsm (cropped)	1.49	178.116	162.187
homo_uascdc42	homo_uascdc4210186	homo_uascdc4224.lsm (cropped)	2.22	171.535	153.296
homo_uascdc42	homo_uascdc4210187	homo_uascdc4224.lsm (cropped)	0.773	171.595	152.461
homo_uascdc42	homo_uascdc4210189	homo_uascdc4224.lsm (cropped)	0.703	165.514	148.652
homo_uascdc42	homo_uascdc4210190	homo_uascdc4224.lsm (cropped)	1.83	169.399	148.825
homo_uascdc42	homo_uascdc4210191	homo_uascdc4224.lsm (cropped)	1.42	167.127	134.341
homo_uascdc42	homo_uascdc4210192	homo_uascdc4224.lsm (cropped)	0.492	166.93	145.468
homo_uascdc42	homo_uascdc4210193	homo_uascdc4224.lsm (cropped)	1.69	166.341	141.284
homo_uascdc42	homo_uascdc4210194	homo_uascdc4224.lsm (cropped)	0.238	156.238	133.662
homo_uascdc42	homo_uascdc4210196	homo_uascdc4224.lsm (cropped)	1.7	163.805	138.997
homo_uascdc42	homo_uascdc4210198	homo_uascdc4224.lsm (cropped)	0.903	168.006	188.109
homo_uascdc42	homo_uascdc4210199	homo_uascdc4224.lsm (cropped)	2.65	179.666	161.292
homo_uascdc42	homo_uascdc4210200	homo_uascdc4224.lsm (cropped)	5.85	173.686	153.476
homo_uascdc42	homo_uascdc4210201	homo_uascdc4224.lsm (cropped)	1.75	164.731	155.193
homo_uascdc42	homo_uascdc4210204	homo_uascdc4224.lsm (cropped)	0.265	160.69	144.474
homo_uascdc42	homo_uascdc4210205	homo_uascdc4224.lsm (cropped)	0.773	176.008	149.968
homo_uascdc42	homo_uascdc4210206	homo_uascdc4224.lsm (cropped)	1.17	171.557	149.739
homo_uascdc42	homo_uascdc4210207	homo_uascdc4224.lsm (cropped)	1.87	174.802	145.238
homo_uascdc42	homo_uascdc4210209	homo_uascdc4224.lsm (cropped)	1.75	176.451	147.928
homo_uascdc42	homo_uascdc4210210	homo_uascdc4224.lsm (cropped)	2.52	176.148	146.4
homo_uascdc42	homo_uascdc4210211	homo_uascdc4224.lsm (cropped)	0.762	165.312	142.446
homo_uascdc42	homo_uascdc4210212	homo_uascdc4224.lsm (cropped)	1.19	169.583	158.317
homo_uascdc42	homo_uascdc4210213	homo_uascdc4224.lsm (cropped)	1.83	178.769	141.75
[truncated: 513 more rows]

## Sheet: Supp Fig 1
Pheno	BlobsID	Item.Name	Volume	GFPPixels	OxtPixels
uasgfpGFPpos	uasgfp_202	uasgfp_01_EGFPpositive.lsm (cropped)	0.362	77.63	150.55
uasgfpGFPpos	uasgfp_203	uasgfp_01_EGFPpositive.lsm (cropped)	0.27	62.12	63.54
uasgfpGFPpos	uasgfp_204	uasgfp_01_EGFPpositive.lsm (cropped)	0.211	63.13	62.82
uasgfpGFPpos	uasgfp_205	uasgfp_01_EGFPpositive.lsm (cropped)	0.292	73.87	93.85
uasgfpGFPpos	uasgfp_206	uasgfp_01_EGFPpositive.lsm (cropped)	0.962	88.5	44.16
uasgfpGFPpos	uasgfp_207	uasgfp_01_EGFPpositive.lsm (cropped)	1.97	104.05	43.08
uasgfpGFPpos	uasgfp_208	uasgfp_01_EGFPpositive.lsm (cropped)	0.481	91.66	29.6
uasgfpGFPpos	uasgfp_209	uasgfp_01_EGFPpositive.lsm (cropped)	0.46	113.75	18.62
uasgfpGFPpos	uasgfp_210	uasgfp_01_EGFPpositive.lsm (cropped)	6.74	124.34	115.11
uasgfpGFPpos	uasgfp_211	uasgfp_01_EGFPpositive.lsm (cropped)	0.27	65.62	34.36
uasgfpGFPpos	uasgfp_212	uasgfp_01_EGFPpositive.lsm (cropped)	0.925	77.74	46.7
uasgfpGFPpos	uasgfp_213	uasgfp_01_EGFPpositive.lsm (cropped)	1.08	85.97	38.63
uasgfpGFPpos	uasgfp_214	uasgfp_01_EGFPpositive.lsm (cropped)	0.876	81.86	98.63
uasgfpGFPpos	uasgfp_215	uasgfp_01_EGFPpositive.lsm (cropped)	0.465	93.2	22.44
uasgfpGFPpos	uasgfp_216	uasgfp_01_EGFPpositive.lsm (cropped)	0.881	90.91	50.21
uasgfpGFPpos	uasgfp_217	uasgfp_01_EGFPpositive.lsm (cropped)	0.249	105.41	19.67
uasgfpGFPpos	uasgfp_218	uasgfp_01_EGFPpositive.lsm (cropped)	2.06	93.34	37.16
uasgfpGFPpos	uasgfp_219	uasgfp_01_EGFPpositive.lsm (cropped)	0.919	92.6	82.52
uasgfpGFPpos	uasgfp_220	uasgfp_01_EGFPpositive.lsm (cropped)	1.43	74.28	65.16
uasgfpGFPpos	uasgfp_221	uasgfp_01_EGFPpositive.lsm (cropped)	0.378	70.06	77.1
uasgfpGFPpos	uasgfp_222	uasgfp_01_EGFPpositive.lsm (cropped)	0.216	92.33	24.45
uasgfpGFPpos	uasgfp_223	uasgfp_01_EGFPpositive.lsm (cropped)	0.276	62.35	126.49
uasgfpGFPpos	uasgfp_224	uasgfp_01_EGFPpositive.lsm (cropped)	1.09	90.12	64.74
uasgfpGFPpos	uasgfp_225	uasgfp_01_EGFPpositive.lsm (cropped)	0.292	69.65	52.06
uasgfpGFPpos	uasgfp_226	uasgfp_01_EGFPpositive.lsm (cropped)	0.941	100.87	23.63
uasgfpGFPpos	uasgfp_227	uasgfp_01_EGFPpositive.lsm (cropped)	1.6	106.17	100.93
uasgfpGFPpos	uasgfp_228	uasgfp_01_EGFPpositive.lsm (cropped)	0.935	72.65	101.06
uasgfpGFPpos	uasgfp_229	uasgfp_01_EGFPpositive.lsm (cropped)	3.9	107.65	115.7
uasgfpGFPpos	uasgfp_230	uasgfp_01_EGFPpositive.lsm (cropped)	0.211	96.59	9.95
uasgfpGFPpos	uasgfp_231	uasgfp_01_EGFPpositive.lsm (cropped)	0.216	68.17	28
uasgfpGFPpos	uasgfp_232	uasgfp_01_EGFPpositive.lsm (cropped)	0.427	70.66	41.1
uasgfpGFPpos	uasgfp_233	uasgfp_01_EGFPpositive.lsm (cropped)	1.29	95.23	43.85
uasgfpGFPpos	uasgfp_234	uasgfp_01_EGFPpositive.lsm (cropped)	0.249	67	82.76
uasgfpGFPpos	uasgfp_235	uasgfp_01_EGFPpositive.lsm (cropped)	1.81	85.85	109.53
uasgfpGFPpos	uasgfp_236	uasgfp_01_EGFPpositive.lsm (cropped)	0.914	92.28	57.01
uasgfpGFPpos	uasgfp_237	uasgfp_01_EGFPpositive.lsm (cropped)	1.8	73.19	109.01
uasgfpGFPpos	uasgfp_238	uasgfp_01_EGFPpositive.lsm (cropped)	2.72	102.7	89.9
uasgfpGFPpos	uasgfp_239	uasgfp_01_EGFPpositive.lsm (cropped)	0.357	85.56	28.05
uasgfpGFPpos	uasgfp_240	uasgfp_01_EGFPpositive.lsm (cropped)	0.205	64.11	36
uasgfpGFPpos	uasgfp_241	uasgfp_01_EGFPpositive.lsm (cropped)	0.514	85.44	28.18
uasgfpGFPpos	uasgfp_242	uasgfp_01_EGFPpositive.lsm (cropped)	0.249	87.8	21.2
uasgfpGFPpos	uasgfp_243	uasgfp_01_EGFPpositive.lsm (cropped)	0.33	91.84	20.89
uasgfpGFPpos	uasgfp_244	uasgfp_01_EGFPpositive.lsm (cropped)	0.411	71.55	84.75
uasgfpGFPpos	uasgfp_245	uasgfp_01_EGFPpositive.lsm (cropped)	0.73	85.94	92.76
uasgfpGFPpos	uasgfp_246	uasgfp_01_EGFPpositive.lsm (cropped)	1.82	81.63	52.61
uasgfpGFPpos	uasgfp_247	uasgfp_01_EGFPpositive.lsm (cropped)	0.227	70.55	65.1
uasgfpGFPpos	uasgfp_248	uasgfp_01_EGFPpositive.lsm (cropped)	0.622	90.7	63.59
uasgfpGFPpos	uasgfp_249	uasgfp_01_EGFPpositive.lsm (cropped)	0.384	77.25	39.17
uasgfpGFPpos	uasgfp_250	uasgfp_01_EGFPpositive.lsm (cropped)	1.15	88.07	25.86
uasgfpGFPpos	uasgfp_251	uasgfp_01_EGFPpositive.lsm (cropped)	0.276	64.1	28.69
uasgfpGFPpos	uasgfp_252	uasgfp_01_EGFPpositive.lsm (cropped)	1.14	91.75	47.69
uasgfpGFPpos	uasgfp_253	uasgfp_01_EGFPpositive.lsm (cropped)	0.265	63.06	56.41
uasgfpGFPpos	uasgfp_254	uasgfp_01_EGFPpositive.lsm (cropped)	1.95	89.69	66.55
uasgfpGFPpos	uasgfp_255	uasgfp_01_EGFPpositive.lsm (cropped)	0.492	73.12	41.82
uasgfpGFPpos	uasgfp_256	uasgfp_01_EGFPpositive.lsm (cropped)	0.406	85.15	46.61
uasgfpGFPpos	uasgfp_257	uasgfp_01_EGFPpositive.lsm (cropped)	2.46	92.09	66.1
uasgfpGFPpos	uasgfp_258	uasgfp_01_EGFPpositive.lsm (cropped)	0.287	62.66	66.4
uasgfpGFPpos	uasgfp_259	uasgfp_01_EGFPpositive.lsm (cropped)	1.9	104.97	49.27
uasgfpGFPpos	uasgfp_260	uasgfp_01_EGFPpositive.lsm (cropped)	1.25	85.6	37
uasgfpGFPpos	uasgfp_261	uasgfp_01_EGFPpositive.lsm (cropped)	1.41	75.22	42.3
uasgfpGFPpos	uasgfp_262	uasgfp_01_EGFPpositive.lsm (cropped)	2.56	81.46	61.53
uasgfpGFPpos	uasgfp_263	uasgfp_01_EGFPpositive.lsm (cropped)	0.211	110.77	121.59
uasgfpGFPpos	uasgfp_264	uasgfp_01_EGFPpositive.lsm (cropped)	0.454	64.44	117.3
uasgfpGFPpos	uasgfp_265	uasgfp_01_EGFPpositive.lsm (cropped)	0.903	91.17	17
uasgfpGFPpos	uasgfp_266	uasgfp_01_EGFPpositive.lsm (cropped)	0.292	63.39	41.04
uasgfpGFPpos	uasgfp_267	uasgfp_01_EGFPpositive.lsm (cropped)	0.887	82.14	33.68
uasgfpGFPpos	uasgfp_268	uasgfp_01_EGFPpositive.lsm (cropped)	0.211	71.95	26.74
uasgfpGFPpos	uasgfp_269	uasgfp_01_EGFPpositive.lsm (cropped)	0.465	94.23	18.48
uasgfpGFPpos	uasgfp_270	uasgfp_01_EGFPpositive.lsm (cropped)	1.37	101.01	50.39
uasgfpGFPpos	uasgfp_271	uasgfp_01_EGFPpositive.lsm (cropped)	1.19	86.4	33.03
uasgfpGFPpos	uasgfp_272	uasgfp_01_EGFPpositive.lsm (cropped)	0.551	69.4	25.38
uasgfpGFPpos	uasgfp_273	uasgfp_01_EGFPpositive.lsm (cropped)	1.66	102.44	29.49
uasgfpGFPpos	uasgfp_274	uasgfp_01_EGFPpositive.lsm (cropped)	1.35	82.88	65.99
uasgfpGFPpos	uasgfp_275	uasgfp_01_EGFPpositive.lsm (cropped)	1.26	77.93	43.45
uasgfpGFPpos	uasgfp_276	uasgfp_01_EGFPpositive.lsm (cropped)	0.319	69.17	68.64
uasgfpGFPpos	uasgfp_277	uasgfp_01_EGFPpositive.lsm (cropped)	0.238	65.18	114.59
uasgfpGFPpos	uasgfp_278	uasgfp_01_EGFPpositive.lsm (cropped)	0.649	78.03	88.97
uasgfpGFPpos	uasgfp_279	uasgfp_01_EGFPpositive.lsm (cropped)	2.76	115.02	42.15
uasgfpGFPpos	uasgfp_280	uasgfp_01_EGFPpositive.lsm (cropped)	0.627	76.58	14.04
uasgfpGFPpos	uasgfp_281	uasgfp_01_EGFPpositive.lsm (cropped)	4.28	131.33	56.23
uasgfpGFPpos	uasgfp_282	uasgfp_01_EGFPpositive.lsm (cropped)	0.968	85.93	43.97
uasgfpGFPpos	uasgfp_283	uasgfp_01_EGFPpositive.lsm (cropped)	2.18	88.86	66.94
uasgfpGFPpos	uasgfp_284	uasgfp_01_EGFPpositive.lsm (cropped)	0.454	101.05	11.14
uasgfpGFPpos	uasgfp_285	uasgfp_01_EGFPpositive.lsm (cropped)	0.4	80.78	21.14
uasgfpGFPpos	uasgfp_286	uasgfp_01_EGFPpositive.lsm (cropped)	2.45	100.35	46.95
uasgfpGFPpos	uasgfp_287	uasgfp_01_EGFPpositive.lsm (cropped)	0.925	90.94	67.72
uasgfpGFPpos	uasgfp_288	uasgfp_01_EGFPpositive.lsm (cropped)	0.422	90.78	89.14
uasgfpGFPpos	uasgfp_289	uasgfp_01_EGFPpositive.lsm (cropped)	1.05	74.32	47.39
uasgfpGFPpos	uasgfp_290	uasgfp_01_EGFPpositive.lsm (cropped)	3.13	90.69	97.81
uasgfpGFPpos	uasgfp_291	uasgfp_01_EGFPpositive.lsm (cropped)	1.62	77.21	50.14
uasgfpGFPpos	uasgfp_292	uasgfp_01_EGFPpositive.lsm (cropped)	0.86	88.38	42.92
uasgfpGFPpos	uasgfp_293	uasgfp_01_EGFPpositive.lsm (cropped)	1.68	84.58	46.68
uasgfpGFPpos	uasgfp_294	uasgfp_01_EGFPpositive.lsm (cropped)	0.303	70.75	89.7
uasgfpGFPpos	uasgfp_295	uasgfp_01_EGFPpositive.lsm (cropped)	0.416	82.04	51.56
uasgfpGFPpos	uasgfp_296	uasgfp_01_EGFPpositive.lsm (cropped)	0.319	77.42	21.42
uasgfpGFPpos	uasgfp_297	uasgfp_01_EGFPpositive.lsm (cropped)	4.24	109.95	66.69
uasgfpGFPpos	uasgfp_298	uasgfp_01_EGFPpositive.lsm (cropped)	1.43	88.93	54.02
uasgfpGFPpos	uasgfp_299	uasgfp_01_EGFPpositive.lsm (cropped)	0.281	65	37.73
uasgfpGFPpos	uasgfp_300	uasgfp_01_EGFPpositive.lsm (cropped)	0.762	89.27	11.8
uasgfpGFPpos	uasgfp_301	uasgfp_01_EGFPpositive.lsm (cropped)	1.06	68.68	112.17
uasgfpGFPpos	uasgfp_1299	uasgfp_02_EGFPpositive.lsm (cropped)	0.238	79.39	8.45
uasgfpGFPpos	uasgfp_1300	uasgfp_02_EGFPpositive.lsm (cropped)	1.56	77.89	34.55
uasgfpGFPpos	uasgfp_1301	uasgfp_02_EGFPpositive.lsm (cropped)	1.75	83.88	42.33
uasgfpGFPpos	uasgfp_1302	uasgfp_02_EGFPpositive.lsm (cropped)	1.49	68.95	32.62
uasgfpGFPpos	uasgfp_1303	uasgfp_02_EGFPpositive.lsm (cropped)	1.02	86.64	14.83
uasgfpGFPpos	uasgfp_1304	uasgfp_02_EGFPpositive.lsm (cropped)	0.27	75.94	5.94
uasgfpGFPpos	uasgfp_1305	uasgfp_02_EGFPpositive.lsm (cropped)	0.541	106.5	10.85
uasgfpGFPpos	uasgfp_1306	uasgfp_02_EGFPpositive.lsm (cropped)	0.487	77.36	37.13
uasgfpGFPpos	uasgfp_1307	uasgfp_02_EGFPpositive.lsm (cropped)	2.21	81.43	19.01
uasgfpGFPpos	uasgfp_1308	uasgfp_02_EGFPpositive.lsm (cropped)	3.57	107.84	27.27
uasgfpGFPpos	uasgfp_1309	uasgfp_02_EGFPpositive.lsm (cropped)	2.03	85.42	39.67
uasgfpGFPpos	uasgfp_1310	uasgfp_02_EGFPpositive.lsm (cropped)	3.53	96.53	23.6
uasgfpGFPpos	uasgfp_1311	uasgfp_02_EGFPpositive.lsm (cropped)	0.724	64.49	23.71
uasgfpGFPpos	uasgfp_1312	uasgfp_02_EGFPpositive.lsm (cropped)	0.238	54.41	17.84
uasgfpGFPpos	uasgfp_1313	uasgfp_02_EGFPpositive.lsm (cropped)	0.292	49.78	15.48
uasgfpGFPpos	uasgfp_1314	uasgfp_02_EGFPpositive.lsm (cropped)	3.74	106.28	56.16
uasgfpGFPpos	uasgfp_1315	uasgfp_02_EGFPpositive.lsm (cropped)	0.211	74.92	8.62
uasgfpGFPpos	uasgfp_1316	uasgfp_02_EGFPpositive.lsm (cropped)	0.903	111.87	9.23
uasgfpGFPpos	uasgfp_1317	uasgfp_02_EGFPpositive.lsm (cropped)	0.281	55.29	28.88
uasgfpGFPpos	uasgfp_1318	uasgfp_02_EGFPpositive.lsm (cropped)	2.54	72.37	46.78
uasgfpGFPpos	uasgfp_1319	uasgfp_02_EGFPpositive.lsm (cropped)	1.02	58.08	59.54
uasgfpGFPpos	uasgfp_1320	uasgfp_02_EGFPpositive.lsm (cropped)	1.73	99.05	51.19
uasgfpGFPpos	uasgfp_1321	uasgfp_02_EGFPpositive.lsm (cropped)	1.74	116.29	7.05
uasgfpGFPpos	uasgfp_1322	uasgfp_02_EGFPpositive.lsm (cropped)	1.02	76.67	62.94
uasgfpGFPpos	uasgfp_1323	uasgfp_02_EGFPpositive.lsm (cropped)	2.49	97.31	53.74
uasgfpGFPpos	uasgfp_1324	uasgfp_02_EGFPpositive.lsm (cropped)	1.27	74.7	54.02
uasgfpGFPpos	uasgfp_1325	uasgfp_02_EGFPpositive.lsm (cropped)	0.487	105.92	6.09
uasgfpGFPpos	uasgfp_1326	uasgfp_02_EGFPpositive.lsm (cropped)	1.5	85.36	32.32
uasgfpGFPpos	uasgfp_1327	uasgfp_02_EGFPpositive.lsm (cropped)	0.481	83.61	30.04
uasgfpGFPpos	uasgfp_1328	uasgfp_02_EGFPpositive.lsm (cropped)	0.243	49.22	16.38
uasgfpGFPpos	uasgfp_1329	uasgfp_02_EGFPpositive.lsm (cropped)	0.27	79.58	13
uasgfpGFPpos	uasgfp_1330	uasgfp_02_EGFPpositive.lsm (cropped)	1.23	57.6	52.64
uasgfpGFPpos	uasgfp_1331	uasgfp_02_EGFPpositive.lsm (cropped)	0.914	69.34	66.56
uasgfpGFPpos	uasgfp_1332	uasgfp_02_EGFPpositive.lsm (cropped)	0.4	57.49	46.93
uasgfpGFPpos	uasgfp_1333	uasgfp_02_EGFPpositive.lsm (cropped)	1.6	83.06	62.1
uasgfpGFPpos	uasgfp_1334	uasgfp_02_EGFPpositive.lsm (cropped)	0.811	74.07	108.25
uasgfpGFPpos	uasgfp_1335	uasgfp_02_EGFPpositive.lsm (cropped)	1.34	82.24	50.42
uasgfpGFPpos	uasgfp_1336	uasgfp_02_EGFPpositive.lsm (cropped)	1.22	82.18	36.29
uasgfpGFPpos	uasgfp_1337	uasgfp_02_EGFPpositive.lsm (cropped)	0.757	85.26	41.78
uasgfpGFPpos	uasgfp_1338	uasgfp_02_EGFPpositive.lsm (cropped)	0.384	66.62	26.15
uasgfpGFPpos	uasgfp_1339	uasgfp_02_EGFPpositive.lsm (cropped)	1.31	67.83	24.25
uasgfpGFPpos	uasgfp_1340	uasgfp_02_EGFPpositive.lsm (cropped)	0.227	56.64	39.88
uasgfpGFPpos	uasgfp_1341	uasgfp_02_EGFPpositive.lsm (cropped)	1.52	111	11.43
uasgfpGFPpos	uasgfp_1342	uasgfp_02_EGFPpositive.lsm (cropped)	4.79	110.4	34.06
uasgfpGFPpos	uasgfp_1343	uasgfp_02_EGFPpositive.lsm (cropped)	0.735	100.15	10.06
uasgfpGFPpos	uasgfp_1344	uasgfp_02_EGFPpositive.lsm (cropped)	0.843	61.94	23.62
uasgfpGFPpos	uasgfp_1345	uasgfp_02_EGFPpositive.lsm (cropped)	0.573	71.98	41.64
uasgfpGFPpos	uasgfp_1346	uasgfp_02_EGFPpositive.lsm (cropped)	0.86	69.3	34.01
uasgfpGFPpos	uasgfp_1347	uasgfp_02_EGFPpositive.lsm (cropped)	5.82	110.85	66.92
uasgfpGFPpos	uasgfp_1348	uasgfp_02_EGFPpositive.lsm (cropped)	3.46	89.28	27.76
uasgfpGFPpos	uasgfp_1349	uasgfp_02_EGFPpositive.lsm (cropped)	0.476	86.98	14.51
uasgfpGFPpos	uasgfp_1350	uasgfp_02_EGFPpositive.lsm (cropped)	0.281	57.67	35.52
uasgfpGFPpos	uasgfp_1351	uasgfp_02_EGFPpositive.lsm (cropped)	2.43	96.39	24.26
uasgfpGFPpos	uasgfp_1352	uasgfp_02_EGFPpositive.lsm (cropped)	0.238	87.95	55.41
uasgfpGFPpos	uasgfp_1353	uasgfp_02_EGFPpositive.lsm (cropped)	0.849	74.66	58.29
uasgfpGFPpos	uasgfp_1354	uasgfp_02_EGFPpositive.lsm (cropped)	2.27	98.85	32.08
uasgfpGFPpos	uasgfp_1355	uasgfp_02_EGFPpositive.lsm (cropped)	0.573	64.16	44.85
uasgfpGFPpos	uasgfp_1356	uasgfp_02_EGFPpositive.lsm (cropped)	0.287	58.28	15.51
uasgfpGFPpos	uasgfp_1357	uasgfp_02_EGFPpositive.lsm (cropped)	0.324	51.07	64.07
uasgfpGFPpos	uasgfp_1358	uasgfp_02_EGFPpositive.lsm (cropped)	0.308	58.77	39.63
uasgfpGFPpos	uasgfp_1359	uasgfp_02_EGFPpositive.lsm (cropped)	0.297	67.31	12.02
uasgfpGFPpos	uasgfp_1360	uasgfp_02_EGFPpositive.lsm (cropped)	0.265	72.98	62.76
uasgfpGFPpos	uasgfp_1361	uasgfp_02_EGFPpositive.lsm (cropped)	5.19	75.14	56.84
uasgfpGFPpos	uasgfp_1362	uasgfp_02_EGFPpositive.lsm (cropped)	0.324	68.58	52.85
uasgfpGFPpos	uasgfp_1363	uasgfp_02_EGFPpositive.lsm (cropped)	0.627	66.47	30.77
uasgfpGFPpos	uasgfp_1364	uasgfp_02_EGFPpositive.lsm (cropped)	0.346	53.23	39.72
uasgfpGFPpos	uasgfp_1365	uasgfp_02_EGFPpositive.lsm (cropped)	1.56	73.56	57.26
uasgfpGFPpos	uasgfp_1366	uasgfp_02_EGFPpositive.lsm (cropped)	2.18	91.01	50.67
uasgfpGFPpos	uasgfp_1367	uasgfp_02_EGFPpositive.lsm (cropped)	4.27	98.66	37.17
uasgfpGFPpos	uasgfp_1368	uasgfp_02_EGFPpositive.lsm (cropped)	2.96	84.24	31.18
uasgfpGFPpos	uasgfp_1369	uasgfp_02_EGFPpositive.lsm (cropped)	0.314	51.26	39.38
uasgfpGFPpos	uasgfp_1370	uasgfp_02_EGFPpositive.lsm (cropped)	1.8	67.99	49.45
uasgfpGFPpos	uasgfp_1371	uasgfp_02_EGFPpositive.lsm (cropped)	0.443	58.35	40.32
uasgfpGFPpos	uasgfp_1372	uasgfp_02_EGFPpositive.lsm (cropped)	1.08	88.83	52.15
uasgfpGFPpos	uasgfp_1373	uasgfp_02_EGFPpositive.lsm (cropped)	0.87	81.63	54.34
uasgfpGFPpos	uasgfp_1374	uasgfp_02_EGFPpositive.lsm (cropped)	0.562	66.94	51.37
uasgfpGFPpos	uasgfp_1375	uasgfp_02_EGFPpositive.lsm (cropped)	1.27	83.55	18.28
uasgfpGFPpos	uasgfp_1376	uasgfp_02_EGFPpositive.lsm (cropped)	0.903	70.02	44.32
uasgfpGFPpos	uasgfp_1377	uasgfp_02_EGFPpositive.lsm (cropped)	2.8	88.35	42.46
uasgfpGFPpos	uasgfp_1378	uasgfp_02_EGFPpositive.lsm (cropped)	1.24	61.9	61.71
uasgfpGFPpos	uasgfp_1379	uasgfp_02_EGFPpositive.lsm (cropped)	0.319	77.83	6.12
uasgfpGFPpos	uasgfp_1380	uasgfp_02_EGFPpositive.lsm (cropped)	0.768	86.77	13.8
uasgfpGFPpos	uasgfp_1381	uasgfp_02_EGFPpositive.lsm (cropped)	4.92	105.86	38.05
uasgfpGFPpos	uasgfp_1382	uasgfp_02_EGFPpositive.lsm (cropped)	0.227	63.1	21.24
uasgfpGFPpos	uasgfp_1383	uasgfp_02_EGFPpositive.lsm (cropped)	0.238	53.64	30.16
uasgfpGFPpos	uasgfp_1384	uasgfp_02_EGFPpositive.lsm (cropped)	0.492	95.87	7.21
uasgfpGFPpos	uasgfp_1385	uasgfp_02_EGFPpositive.lsm (cropped)	0.47	59.98	138.4
uasgfpGFPpos	uasgfp_1386	uasgfp_02_EGFPpositive.lsm (cropped)	0.979	104.23	20.56
uasgfpGFPpos	uasgfp_1387	uasgfp_02_EGFPpositive.lsm (cropped)	2.43	80.04	59.72
uasgfpGFPpos	uasgfp_1388	uasgfp_02_EGFPpositive.lsm (cropped)	0.205	79.24	5.5
uasgfpGFPpos	uasgfp_1389	uasgfp_02_EGFPpositive.lsm (cropped)	0.708	117.05	6.7
uasgfpGFPpos	uasgfp_2703	uasgfp_03_EGFPpositive.lsm (cropped)	1.37	105.28	14.14
uasgfpGFPpos	uasgfp_2704	uasgfp_03_EGFPpositive.lsm (cropped)	2.87	119.75	11.38
uasgfpGFPpos	uasgfp_2705	uasgfp_03_EGFPpositive.lsm (cropped)	0.827	90.92	7.76
uasgfpGFPpos	uasgfp_2706	uasgfp_03_EGFPpositive.lsm (cropped)	0.903	95.43	8.97
uasgfpGFPpos	uasgfp_2707	uasgfp_03_EGFPpositive.lsm (cropped)	0.292	69.15	11.67
uasgfpGFPpos	uasgfp_2708	uasgfp_03_EGFPpositive.lsm (cropped)	0.211	107.23	40
uasgfpGFPpos	uasgfp_2709	uasgfp_03_EGFPpositive.lsm (cropped)	4.58	113.38	41.32
uasgfpGFPpos	uasgfp_2710	uasgfp_03_EGFPpositive.lsm (cropped)	0.265	78.18	28.76
uasgfpGFPpos	uasgfp_2711	uasgfp_03_EGFPpositive.lsm (cropped)	3.81	103.2	30.38
uasgfpGFPpos	uasgfp_2712	uasgfp_03_EGFPpositive.lsm (cropped)	0.692	91.83	22.27
uasgfpGFPpos	uasgfp_2713	uasgfp_03_EGFPpositive.lsm (cropped)	0.719	80.08	34.97
uasgfpGFPpos	uasgfp_2714	uasgfp_03_EGFPpositive.lsm (cropped)	1.86	89.76	36.63
uasgfpGFPpos	uasgfp_2715	uasgfp_03_EGFPpositive.lsm (cropped)	0.276	102.94	19.71
uasgfpGFPpos	uasgfp_2716	uasgfp_03_EGFPpositive.lsm (cropped)	4.48	123.88	38.92
uasgfpGFPpos	uasgfp_2717	uasgfp_03_EGFPpositive.lsm (cropped)	0.384	113.85	14.31
uasgfpGFPpos	uasgfp_2718	uasgfp_03_EGFPpositive.lsm (cropped)	0.487	64.01	146.8
uasgfpGFPpos	uasgfp_2719	uasgfp_03_EGFPpositive.lsm (cropped)	1.06	96.97	81.44
uasgfpGFPpos	uasgfp_2720	uasgfp_03_EGFPpositive.lsm (cropped)	0.562	72.55	23.05
uasgfpGFPpos	uasgfp_2721	uasgfp_03_EGFPpositive.lsm (cropped)	0.887	96.9	47.69
uasgfpGFPpos	uasgfp_2722	uasgfp_03_EGFPpositive.lsm (cropped)	2.94	114.78	61.63
uasgfpGFPpos	uasgfp_2723	uasgfp_03_EGFPpositive.lsm (cropped)	1.44	105.01	48.91
uasgfpGFPpos	uasgfp_2724	uasgfp_03_EGFPpositive.lsm (cropped)	10.23	130.66	57.62
uasgfpGFPpos	uasgfp_2725	uasgfp_03_EGFPpositive.lsm (cropped)	3.97	104.76	61.9
uasgfpGFPpos	uasgfp_2726	uasgfp_03_EGFPpositive.lsm (cropped)	0.422	109.56	35.72
uasgfpGFPpos	uasgfp_2727	uasgfp_03_EGFPpositive.lsm (cropped)	0.276	63.51	107.43
uasgfpGFPpos	uasgfp_2728	uasgfp_03_EGFPpositive.lsm (cropped)	0.638	81.33	18.45
uasgfpGFPpos	uasgfp_2729	uasgfp_03_EGFPpositive.lsm (cropped)	0.249	80.41	40.76
uasgfpGFPpos	uasgfp_2730	uasgfp_03_EGFPpositive.lsm (cropped)	0.568	78.36	94.01
uasgfpGFPpos	uasgfp_2731	uasgfp_03_EGFPpositive.lsm (cropped)	2.57	98.98	44.59
uasgfpGFPpos	uasgfp_2732	uasgfp_03_EGFPpositive.lsm (cropped)	0.87	100.89	36.78
uasgfpGFPpos	uasgfp_2733	uasgfp_03_EGFPpositive.lsm (cropped)	3.68	126.94	58.51
uasgfpGFPpos	uasgfp_2734	uasgfp_03_EGFPpositive.lsm (cropped)	0.433	81.9	66.67
uasgfpGFPpos	uasgfp_2735	uasgfp_03_EGFPpositive.lsm (cropped)	1.44	111.67	23.93
uasgfpGFPpos	uasgfp_2736	uasgfp_03_EGFPpositive.lsm (cropped)	0.892	83.28	44.19
uasgfpGFPpos	uasgfp_2737	uasgfp_03_EGFPpositive.lsm (cropped)	0.8	82.11	17.78
uasgfpGFPpos	uasgfp_2738	uasgfp_03_EGFPpositive.lsm (cropped)	4.82	120.08	32.18
uasgfpGFPpos	uasgfp_2739	uasgfp_03_EGFPpositive.lsm (cropped)	6.14	122.27	41.89
uasgfpGFPpos	uasgfp_2740	uasgfp_03_EGFPpositive.lsm (cropped)	0.243	60.96	96.16
uasgfpGFPpos	uasgfp_2741	uasgfp_03_EGFPpositive.lsm (cropped)	0.222	70.78	13.8
uasgfpGFPpos	uasgfp_2742	uasgfp_03_EGFPpositive.lsm (cropped)	1.77	107.15	54.03
uasgfpGFPpos	uasgfp_2743	uasgfp_03_EGFPpositive.lsm (cropped)	0.53	83.03	139.94
uasgfpGFPpos	uasgfp_2744	uasgfp_03_EGFPpositive.lsm (cropped)	1.46	102.66	48.44
uasgfpGFPpos	uasgfp_2745	uasgfp_03_EGFPpositive.lsm (cropped)	3.65	113	54.88
uasgfpGFPpos	uasgfp_2746	uasgfp_03_EGFPpositive.lsm (cropped)	0.249	61.35	47.28
uasgfpGFPpos	uasgfp_2747	uasgfp_03_EGFPpositive.lsm (cropped)	0.535	82.49	62.6
uasgfpGFPpos	uasgfp_2748	uasgfp_03_EGFPpositive.lsm (cropped)	3.17	95.56	39.46
uasgfpGFPpos	uasgfp_2749	uasgfp_03_EGFPpositive.lsm (cropped)	0.633	82.96	65.97
uasgfpGFPpos	uasgfp_2750	uasgfp_03_EGFPpositive.lsm (cropped)	7.39	120.09	61.5
uasgfpGFPpos	uasgfp_2751	uasgfp_03_EGFPpositive.lsm (cropped)	2.31	128.74	47.01
uasgfpGFPpos	uasgfp_2752	uasgfp_03_EGFPpositive.lsm (cropped)	0.303	64.09	91.54
uasgfpGFPpos	uasgfp_2753	uasgfp_03_EGFPpositive.lsm (cropped)	0.265	70.27	93
uasgfpGFPpos	uasgfp_2754	uasgfp_03_EGFPpositive.lsm (cropped)	0.606	83.79	91.33
uasgfpGFPpos	uasgfp_2755	uasgfp_03_EGFPpositive.lsm (cropped)	0.741	88.51	57.77
uasgfpGFPpos	uasgfp_2756	uasgfp_03_EGFPpositive.lsm (cropped)	7	123.49	47.3
uasgfpGFPpos	uasgfp_2757	uasgfp_03_EGFPpositive.lsm (cropped)	0.205	79.66	58.95
uasgfpGFPpos	uasgfp_2758	uasgfp_03_EGFPpositive.lsm (cropped)	8.76	121.07	39.05
uasgfpGFPpos	uasgfp_2759	uasgfp_03_EGFPpositive.lsm (cropped)	1.72	107.23	73.15
uasgfpGFPpos	uasgfp_2760	uasgfp_03_EGFPpositive.lsm (cropped)	0.551	92.58	74.12
uasgfpGFPpos	uasgfp_2761	uasgfp_03_EGFPpositive.lsm (cropped)	0.714	96.8	31.88
uasgfpGFPpos	uasgfp_2762	uasgfp_03_EGFPpositive.lsm (cropped)	1	91.98	19.09
uasgfpGFPpos	uasgfp_2763	uasgfp_03_EGFPpositive.lsm (cropped)	0.454	71.71	19.37
uasgfpGFPpos	uasgfp_2764	uasgfp_03_EGFPpositive.lsm (cropped)	1.61	100.43	36.06
uasgfpGFPpos	uasgfp_2765	uasgfp_03_EGFPpositive.lsm (cropped)	2.69	91.36	34.21
uasgfpGFPpos	uasgfp_2766	uasgfp_03_EGFPpositive.lsm (cropped)	1.51	79.18	37.98
uasgfpGFPpos	uasgfp_2767	uasgfp_03_EGFPpositive.lsm (cropped)	9.11	131.78	45.92
uasgfpGFPpos	uasgfp_2768	uasgfp_03_EGFPpositive.lsm (cropped)	0.357	72.82	56.83
uasgfpGFPpos	uasgfp_2769	uasgfp_03_EGFPpositive.lsm (cropped)	3.31	122.79	34.51
uasgfpGFPpos	uasgfp_2770	uasgfp_03_EGFPpositive.lsm (cropped)	0.205	102.16	23.61
uasgfpGFPpos	uasgfp_2771	uasgfp_03_EGFPpositive.lsm (cropped)	0.562	82.38	58.38
uasgfpGFPpos	uasgfp_2772	uasgfp_03_EGFPpositive.lsm (cropped)	1.01	102.86	75.19
uasgfpGFPpos	uasgfp_2773	uasgfp_03_EGFPpositive.lsm (cropped)	2.76	104.69	45.93
uasgfpGFPpos	uasgfp_2774	uasgfp_03_EGFPpositive.lsm (cropped)	5.52	111.13	38.77
uasgfpGFPpos	uasgfp_2775	uasgfp_03_EGFPpositive.lsm (cropped)	4.23	117.45	22.15
uasgfpGFPpos	uasgfp_2776	uasgfp_03_EGFPpositive.lsm (cropped)	0.741	82.69	23.4
uasgfpGFPpos	uasgfp_2777	uasgfp_03_EGFPpositive.lsm (cropped)	0.654	96.65	23.31
uasgfpGFPpos	uasgfp_2778	uasgfp_03_EGFPpositive.lsm (cropped)	0.773	85.5	21.08
uasgfpGFPpos	uasgfp_2779	uasgfp_03_EGFPpositive.lsm (cropped)	0.573	72.07	15.46
uasgfpGFPpos	uasgfp_2780	uasgfp_03_EGFPpositive.lsm (cropped)	2.13	114.47	19.01
uasgfpGFPpos	uasgfp_2781	uasgfp_03_EGFPpositive.lsm (cropped)	0.508	84.95	32.17
uasgfpGFPpos	uasgfp_2782	uasgfp_03_EGFPpositive.lsm (cropped)	0.335	66.4	30.9
uasgfpGFPpos	uasgfp_2783	uasgfp_03_EGFPpositive.lsm (cropped)	0.232	79.14	16.3
uasgfpGFPpos	uasgfp_2784	uasgfp_03_EGFPpositive.lsm (cropped)	0.611	105.95	14.83
uasgfpGFPpos	uasgfp_2785	uasgfp_03_EGFPpositive.lsm (cropped)	2.34	101.34	34.82
uasgfpGFPpos	uasgfp_4228	uasgfp_04_EGFPpositive.lsm (cropped)	0.2	106.89	9.65
uasgfpGFPpos	uasgfp_4229	uasgfp_04_EGFPpositive.lsm (cropped)	0.287	140.17	14.91
uasgfpGFPpos	uasgfp_4230	uasgfp_04_EGFPpositive.lsm (cropped)	2.25	150.07	36
uasgfpGFPpos	uasgfp_4231	uasgfp_04_EGFPpositive.lsm (cropped)	0.2	86.89	18.68
uasgfpGFPpos	uasgfp_4232	uasgfp_04_EGFPpositive.lsm (cropped)	2.25	130.36	51.32
uasgfpGFPpos	uasgfp_4233	uasgfp_04_EGFPpositive.lsm (cropped)	0.222	110.68	247.39
uasgfpGFPpos	uasgfp_4234	uasgfp_04_EGFPpositive.lsm (cropped)	3.11	148.88	68.29
uasgfpGFPpos	uasgfp_4235	uasgfp_04_EGFPpositive.lsm (cropped)	1.63	127.53	37.8
uasgfpGFPpos	uasgfp_4236	uasgfp_04_EGFPpositive.lsm (cropped)	7.28	155.6	47.24
uasgfpGFPpos	uasgfp_4237	uasgfp_04_EGFPpositive.lsm (cropped)	4.14	160.28	56.06
uasgfpGFPpos	uasgfp_4238	uasgfp_04_EGFPpositive.lsm (cropped)	1.14	97.53	40
uasgfpGFPpos	uasgfp_4239	uasgfp_04_EGFPpositive.lsm (cropped)	1.49	135.89	33.15
uasgfpGFPpos	uasgfp_4240	uasgfp_04_EGFPpositive.lsm (cropped)	1.46	138.44	51.86
uasgfpGFPpos	uasgfp_4241	uasgfp_04_EGFPpositive.lsm (cropped)	4.4	145.6	28.02
uasgfpGFPpos	uasgfp_4242	uasgfp_04_EGFPpositive.lsm (cropped)	2.33	110.3	55.65
uasgfpGFPpos	uasgfp_4243	uasgfp_04_EGFPpositive.lsm (cropped)	0.254	83.89	41.23
uasgfpGFPpos	uasgfp_4244	uasgfp_04_EGFPpositive.lsm (cropped)	0.2	82.14	106.84
uasgfpGFPpos	uasgfp_4245	uasgfp_04_EGFPpositive.lsm (cropped)	2.21	139.65	97.16
uasgfpGFPpos	uasgfp_4246	uasgfp_04_EGFPpositive.lsm (cropped)	0.26	84.73	21.9
uasgfpGFPpos	uasgfp_4247	uasgfp_04_EGFPpositive.lsm (cropped)	0.281	92.1	58.88
uasgfpGFPpos	uasgfp_4248	uasgfp_04_EGFPpositive.lsm (cropped)	0.27	100.1	53.36
uasgfpGFPpos	uasgfp_4249	uasgfp_04_EGFPpositive.lsm (cropped)	1.84	124.79	66.74
uasgfpGFPpos	uasgfp_4250	uasgfp_04_EGFPpositive.lsm (cropped)	12.33	157.31	63.26
uasgfpGFPpos	uasgfp_4251	uasgfp_04_EGFPpositive.lsm (cropped)	0.779	122.34	22.83
uasgfpGFPpos	uasgfp_4252	uasgfp_04_EGFPpositive.lsm (cropped)	0.232	115.42	10.16
uasgfpGFPpos	uasgfp_4253	uasgfp_04_EGFPpositive.lsm (cropped)	2.51	150.09	61.45
uasgfpGFPpos	uasgfp_4254	uasgfp_04_EGFPpositive.lsm (cropped)	1.76	130.78	70.65
uasgfpGFPpos	uasgfp_4255	uasgfp_04_EGFPpositive.lsm (cropped)	5.42	138.51	61.92
uasgfpGFPpos	uasgfp_4256	uasgfp_04_EGFPpositive.lsm (cropped)	2.29	116.77	57.24
uasgfpGFPpos	uasgfp_4257	uasgfp_04_EGFPpositive.lsm (cropped)	2.28	146.29	80.6
uasgfpGFPpos	uasgfp_4258	uasgfp_04_EGFPpositive.lsm (cropped)	0.2	91.7	101.84
uasgfpGFPpos	uasgfp_4259	uasgfp_04_EGFPpositive.lsm (cropped)	1.85	108.55	60.12
uasgfpGFPpos	uasgfp_4260	uasgfp_04_EGFPpositive.lsm (cropped)	0.303	72.96	56.96
uasgfpGFPpos	uasgfp_4261	uasgfp_04_EGFPpositive.lsm (cropped)	0.584	82.47	57.17
uasgfpGFPpos	uasgfp_4262	uasgfp_04_EGFPpositive.lsm (cropped)	1.56	148.91	41.63
uasgfpGFPpos	uasgfp_4263	uasgfp_04_EGFPpositive.lsm (cropped)	0.519	81.67	32.73
uasgfpGFPpos	uasgfp_4264	uasgfp_04_EGFPpositive.lsm (cropped)	0.416	103.3	13.91
uasgfpGFPpos	uasgfp_4265	uasgfp_04_EGFPpositive.lsm (cropped)	1.81	97.96	27.79
uasgfpGFPpos	uasgfp_4266	uasgfp_04_EGFPpositive.lsm (cropped)	0.308	108.16	43.32
uasgfpGFPpos	uasgfp_4267	uasgfp_04_EGFPpositive.lsm (cropped)	0.319	96.07	46.07
uasgfpGFPpos	uasgfp_4268	uasgfp_04_EGFPpositive.lsm (cropped)	0.319	95.1	18.46
uasgfpGFPpos	uasgfp_4269	uasgfp_04_EGFPpositive.lsm (cropped)	1.34	139.73	61.61
uasgfpGFPpos	uasgfp_4270	uasgfp_04_EGFPpositive.lsm (cropped)	1.71	123.92	46.35
uasgfpGFPpos	uasgfp_4271	uasgfp_04_EGFPpositive.lsm (cropped)	3.08	131.26	94.06
uasgfpGFPpos	uasgfp_4272	uasgfp_04_EGFPpositive.lsm (cropped)	3.32	152.53	72.47
uasgfpGFPpos	uasgfp_4273	uasgfp_04_EGFPpositive.lsm (cropped)	1.19	120.96	67.11
uasgfpGFPpos	uasgfp_4274	uasgfp_04_EGFPpositive.lsm (cropped)	0.362	109	48.45
uasgfpGFPpos	uasgfp_4275	uasgfp_04_EGFPpositive.lsm (cropped)	0.562	97.8	64.07
uasgfpGFPpos	uasgfp_4276	uasgfp_04_EGFPpositive.lsm (cropped)	2.12	140.11	68.66
uasgfpGFPpos	uasgfp_4277	uasgfp_04_EGFPpositive.lsm (cropped)	3.24	144.78	91.29
uasgfpGFPpos	uasgfp_4278	uasgfp_04_EGFPpositive.lsm (cropped)	0.919	123.36	58.85
uasgfpGFPpos	uasgfp_4279	uasgfp_04_EGFPpositive.lsm (cropped)	1.03	127.62	65.43
uasgfpGFPpos	uasgfp_4280	uasgfp_04_EGFPpositive.lsm (cropped)	0.33	122.66	6.85
uasgfpGFPpos	uasgfp_4281	uasgfp_04_EGFPpositive.lsm (cropped)	0.551	121.65	95.62
uasgfpGFPpos	uasgfp_4282	uasgfp_04_EGFPpositive.lsm (cropped)	5.7	140.19	38.45
uasgfpGFPpos	uasgfp_4283	uasgfp_04_EGFPpositive.lsm (cropped)	0.2	98.3	76.38
uasgfpGFPpos	uasgfp_4284	uasgfp_04_EGFPpositive.lsm (cropped)	3.33	154.23	56.72
uasgfpGFPpos	uasgfp_4285	uasgfp_04_EGFPpositive.lsm (cropped)	0.308	89.72	38.84
uasgfpGFPpos	uasgfp_4286	uasgfp_04_EGFPpositive.lsm (cropped)	2.03	155.33	98.65
uasgfpGFPpos	uasgfp_4287	uasgfp_04_EGFPpositive.lsm (cropped)	8.34	160.49	44.13
uasgfpGFPpos	uasgfp_4288	uasgfp_04_EGFPpositive.lsm (cropped)	1.61	120.65	29.68
uasgfpGFPpos	uasgfp_4289	uasgfp_04_EGFPpositive.lsm (cropped)	0.789	124.64	66.85
uasgfpGFPpos	uasgfp_4290	uasgfp_04_EGFPpositive.lsm (cropped)	1.65	139.28	20.1
uasgfpGFPpos	uasgfp_4291	uasgfp_04_EGFPpositive.lsm (cropped)	0.205	88.37	44.11
uasgfpGFPpos	uasgfp_4292	uasgfp_04_EGFPpositive.lsm (cropped)	0.238	112.14	75.45
uasgfpGFPpos	uasgfp_4293	uasgfp_04_EGFPpositive.lsm (cropped)	5.69	140.16	54.83
uasgfpGFPpos	uasgfp_4294	uasgfp_04_EGFPpositive.lsm (cropped)	8.87	154.66	75.1
uasgfpGFPpos	uasgfp_4295	uasgfp_04_EGFPpositive.lsm (cropped)	0.919	111.48	32.87
uasgfpGFPpos	uasgfp_4296	uasgfp_04_EGFPpositive.lsm (cropped)	0.211	80.26	40.56
uasgfpGFPpos	uasgfp_4297	uasgfp_04_EGFPpositive.lsm (cropped)	0.422	92.56	31.69
uasgfpGFPpos	uasgfp_4298	uasgfp_04_EGFPpositive.lsm (cropped)	1.17	138.25	65.2
uasgfpGFPpos	uasgfp_4299	uasgfp_04_EGFPpositive.lsm (cropped)	3.95	143.38	47.99
uasgfpGFPpos	uasgfp_4300	uasgfp_04_EGFPpositive.lsm (cropped)	3.64	143.91	59.19
uasgfpGFPpos	uasgfp_4301	uasgfp_04_EGFPpositive.lsm (cropped)	0.524	103.2	42.71
uasgfpGFPpos	uasgfp_4302	uasgfp_04_EGFPpositive.lsm (cropped)	4.03	140.6	47.93
uasgfpGFPpos	uasgfp_4303	uasgfp_04_EGFPpositive.lsm (cropped)	0.908	131.68	35.41
uasgfpGFPpos	uasgfp_4304	uasgfp_04_EGFPpositive.lsm (cropped)	0.551	117.25	83.43
uasgfpGFPpos	uasgfp_4305	uasgfp_04_EGFPpositive.lsm (cropped)	1.31	126.2	36.43
uasgfpGFPpos	uasgfp_4306	uasgfp_04_EGFPpositive.lsm (cropped)	0.806	113.73	51.36
uasgfpGFPpos	uasgfp_4307	uasgfp_04_EGFPpositive.lsm (cropped)	0.416	84.64	16.74
uasgfpGFPpos	uasgfp_4308	uasgfp_04_EGFPpositive.lsm (cropped)	0.341	132.21	8.27
uasgfpGFPpos	uasgfp_4309	uasgfp_04_EGFPpositive.lsm (cropped)	0.281	129.58	9.71
uasgfpGFPpos	uasgfp_5765	uasgfp_05_EGFPpositive.lsm (cropped)	1.31	121.98	6.16
uasgfpGFPpos	uasgfp_5766	uasgfp_05_EGFPpositive.lsm (cropped)	0.422	96.08	6.51
uasgfpGFPpos	uasgfp_5767	uasgfp_05_EGFPpositive.lsm (cropped)	0.519	103.29	6.35
uasgfpGFPpos	uasgfp_5768	uasgfp_05_EGFPpositive.lsm (cropped)	0.27	104.46	38.06
uasgfpGFPpos	uasgfp_5769	uasgfp_05_EGFPpositive.lsm (cropped)	1.95	123.33	7.63
uasgfpGFPpos	uasgfp_5770	uasgfp_05_EGFPpositive.lsm (cropped)	0.611	115.65	14.8
uasgfpGFPpos	uasgfp_5771	uasgfp_05_EGFPpositive.lsm (cropped)	0.33	90.43	8.18
uasgfpGFPpos	uasgfp_5772	uasgfp_05_EGFPpositive.lsm (cropped)	0.373	94.35	9.14
uasgfpGFPpos	uasgfp_5773	uasgfp_05_EGFPpositive.lsm (cropped)	0.2	84	31.19
uasgfpGFPpos	uasgfp_5774	uasgfp_05_EGFPpositive.lsm (cropped)	0.341	62.73	43.4
uasgfpGFPpos	uasgfp_5775	uasgfp_05_EGFPpositive.lsm (cropped)	1.25	123.57	25.27
uasgfpGFPpos	uasgfp_5776	uasgfp_05_EGFPpositive.lsm (cropped)	1.52	81.93	33.83
uasgfpGFPpos	uasgfp_5777	uasgfp_05_EGFPpositive.lsm (cropped)	0.838	72.67	27.86
uasgfpGFPpos	uasgfp_5778	uasgfp_05_EGFPpositive.lsm (cropped)	1.37	116.19	25.93
uasgfpGFPpos	uasgfp_5779	uasgfp_05_EGFPpositive.lsm (cropped)	0.222	61.78	54.83
uasgfpGFPpos	uasgfp_5780	uasgfp_05_EGFPpositive.lsm (cropped)	0.854	91.84	23.48
uasgfpGFPpos	uasgfp_5781	uasgfp_05_EGFPpositive.lsm (cropped)	0.254	127.02	14.68
uasgfpGFPpos	uasgfp_5782	uasgfp_05_EGFPpositive.lsm (cropped)	2.78	123.09	103.31
uasgfpGFPpos	uasgfp_5783	uasgfp_05_EGFPpositive.lsm (cropped)	1.51	103.87	31.25
uasgfpGFPpos	uasgfp_5784	uasgfp_05_EGFPpositive.lsm (cropped)	1.11	68.9	74.87
uasgfpGFPpos	uasgfp_5785	uasgfp_05_EGFPpositive.lsm (cropped)	0.752	97.5	19.92
uasgfpGFPpos	uasgfp_5786	uasgfp_05_EGFPpositive.lsm (cropped)	0.254	86.13	67.85
uasgfpGFPpos	uasgfp_5787	uasgfp_05_EGFPpositive.lsm (cropped)	0.643	83.97	5.45
uasgfpGFPpos	uasgfp_5788	uasgfp_05_EGFPpositive.lsm (cropped)	0.281	84.94	7.1
uasgfpGFPpos	uasgfp_5789	uasgfp_05_EGFPpositive.lsm (cropped)	0.752	95.08	13.27
uasgfpGFPpos	uasgfp_5790	uasgfp_05_EGFPpositive.lsm (cropped)	0.784	105.74	32.03
uasgfpGFPpos	uasgfp_5791	uasgfp_05_EGFPpositive.lsm (cropped)	0.47	95.34	75.4
uasgfpGFPpos	uasgfp_5792	uasgfp_05_EGFPpositive.lsm (cropped)	2.11	119.07	46.06
uasgfpGFPpos	uasgfp_5793	uasgfp_05_EGFPpositive.lsm (cropped)	0.703	107.62	40.78
uasgfpGFPpos	uasgfp_5794	uasgfp_05_EGFPpositive.lsm (cropped)	0.216	63.85	36.7
uasgfpGFPpos	uasgfp_5795	uasgfp_05_EGFPpositive.lsm (cropped)	0.66	64.52	29.43
uasgfpGFPpos	uasgfp_5796	uasgfp_05_EGFPpositive.lsm (cropped)	0.406	61.72	98.76
uasgfpGFPpos	uasgfp_5797	uasgfp_05_EGFPpositive.lsm (cropped)	1.19	71.65	87.15
uasgfpGFPpos	uasgfp_5798	uasgfp_05_EGFPpositive.lsm (cropped)	0.406	63.33	59.05
uasgfpGFPpos	uasgfp_5799	uasgfp_05_EGFPpositive.lsm (cropped)	0.746	113.9	34.49
uasgfpGFPpos	uasgfp_5800	uasgfp_05_EGFPpositive.lsm (cropped)	2	100.45	31.53
uasgfpGFPpos	uasgfp_5801	uasgfp_05_EGFPpositive.lsm (cropped)	0.952	115.43	25.8
uasgfpGFPpos	uasgfp_5802	uasgfp_05_EGFPpositive.lsm (cropped)	0.633	88.71	16.09
uasgfpGFPpos	uasgfp_5803	uasgfp_05_EGFPpositive.lsm (cropped)	1.08	119.04	7.41
uasgfpGFPpos	uasgfp_5804	uasgfp_05_EGFPpositive.lsm (cropped)	0.222	124.83	11.88
uasgfpGFPpos	uasgfp_5805	uasgfp_05_EGFPpositive.lsm (cropped)	4.04	135.94	9.01
uasgfpGFPpos	uasgfp_5806	uasgfp_05_EGFPpositive.lsm (cropped)	0.406	68.51	44.09
uasgfpGFPpos	uasgfp_5807	uasgfp_05_EGFPpositive.lsm (cropped)	0.238	92.39	31.23
uasgfpGFPpos	uasgfp_5808	uasgfp_05_EGFPpositive.lsm (cropped)	3.01	132.42	10.85
uasgfpGFPpos	uasgfp_5809	uasgfp_05_EGFPpositive.lsm (cropped)	1.75	105.09	8.01
uasgfpGFPpos	uasgfp_5810	uasgfp_05_EGFPpositive.lsm (cropped)	0.211	95.9	9.26
uasgfpGFPpos	uasgfp_5811	uasgfp_05_EGFPpositive.lsm (cropped)	0.27	70.1	26.06
uasgfpGFPpos	uasgfp_5812	uasgfp_05_EGFPpositive.lsm (cropped)	0.4	66.74	40.12
uasgfpGFPpos	uasgfp_5813	uasgfp_05_EGFPpositive.lsm (cropped)	0.427	91.59	33.41
uasgfpGFPpos	uasgfp_5814	uasgfp_05_EGFPpositive.lsm (cropped)	0.654	109.5	23.18
uasgfpGFPpos	uasgfp_5815	uasgfp_05_EGFPpositive.lsm (cropped)	0.243	85.82	31.64
uasgfpGFPpos	uasgfp_5816	uasgfp_05_EGFPpositive.lsm (cropped)	0.216	85	88.2
uasgfpGFPpos	uasgfp_5817	uasgfp_05_EGFPpositive.lsm (cropped)	1.69	107.18	36.31
uasgfpGFPpos	uasgfp_5818	uasgfp_05_EGFPpositive.lsm (cropped)	0.46	71.41	21.32
uasgfpGFPpos	uasgfp_5819	uasgfp_05_EGFPpositive.lsm (cropped)	0.249	114.85	14.74
uasgfpGFPpos	uasgfp_5820	uasgfp_05_EGFPpositive.lsm (cropped)	0.324	91.38	24.3
uasgfpGFPpos	uasgfp_5821	uasgfp_05_EGFPpositive.lsm (cropped)	0.26	104.52	24.52
uasgfpGFPpos	uasgfp_5822	uasgfp_05_EGFPpositive.lsm (cropped)	0.627	74.34	25.97
uasgfpGFPpos	uasgfp_5823	uasgfp_05_EGFPpositive.lsm (cropped)	0.4	125.45	20.49
uasgfpGFPpos	uasgfp_5824	uasgfp_05_EGFPpositive.lsm (cropped)	5.89	136.31	18.07
uasgfpGFPpos	uasgfp_5825	uasgfp_05_EGFPpositive.lsm (cropped)	0.622	102.83	32.58
uasgfpGFPpos	uasgfp_5826	uasgfp_05_EGFPpositive.lsm (cropped)	0.357	81.68	47.18
uasgfpGFPpos	uasgfp_5827	uasgfp_05_EGFPpositive.lsm (cropped)	1.9	123.12	42.32
uasgfpGFPpos	uasgfp_5828	uasgfp_05_EGFPpositive.lsm (cropped)	2.4	102.87	24.06
uasgfpGFPpos	uasgfp_5829	uasgfp_05_EGFPpositive.lsm (cropped)	0.33	114.72	45.28
uasgfpGFPpos	uasgfp_5830	uasgfp_05_EGFPpositive.lsm (cropped)	2.76	105.17	33.97
uasgfpGFPpos	uasgfp_5831	uasgfp_05_EGFPpositive.lsm (cropped)	3.3	114.75	34.17
uasgfpGFPpos	uasgfp_5832	uasgfp_05_EGFPpositive.lsm (cropped)	1.33	67.46	67.88
uasgfpGFPpos	uasgfp_5833	uasgfp_05_EGFPpositive.lsm (cropped)	2.19	116.43	6.84
uasgfpGFPpos	uasgfp_5834	uasgfp_05_EGFPpositive.lsm (cropped)	4.11	125.34	28.34
uasgfpGFPpos	uasgfp_5835	uasgfp_05_EGFPpositive.lsm (cropped)	2.87	107.55	45.57
uasgfpGFPpos	uasgfp_5836	uasgfp_05_EGFPpositive.lsm (cropped)	0.768	93.45	20.17
uasgfpGFPpos	uasgfp_5837	uasgfp_05_EGFPpositive.lsm (cropped)	0.389	60.93	51.01
uasgfpGFPpos	uasgfp_5838	uasgfp_05_EGFPpositive.lsm (cropped)	2.74	134.44	20.46
uasgfpGFPpos	uasgfp_5839	uasgfp_05_EGFPpositive.lsm (cropped)	5.94	103.52	70.7
uasgfpGFPpos	uasgfp_5840	uasgfp_05_EGFPpositive.lsm (cropped)	0.384	62.48	31.08
uasgfpGFPpos	uasgfp_5841	uasgfp_05_EGFPpositive.lsm (cropped)	6.15	116.6	70.46
uasgfpGFPpos	uasgfp_5842	uasgfp_05_EGFPpositive.lsm (cropped)	0.584	67.31	56.51
uasgfpGFPpos	uasgfp_5843	uasgfp_05_EGFPpositive.lsm (cropped)	1.16	77.18	48.61
uasgfpGFPpos	uasgfp_5844	uasgfp_05_EGFPpositive.lsm (cropped)	2.65	129.65	51.76
uasgfpGFPpos	uasgfp_5845	uasgfp_05_EGFPpositive.lsm (cropped)	4.94	135.25	37.33
uasgfpGFPpos	uasgfp_5846	uasgfp_05_EGFPpositive.lsm (cropped)	0.222	82.76	64.17
uasgfpGFPpos	uasgfp_5847	uasgfp_05_EGFPpositive.lsm (cropped)	0.308	75.39	89.47
uasgfpGFPpos	uasgfp_5848	uasgfp_05_EGFPpositive.lsm (cropped)	1.1	78.7	58.19
uasgfpGFPpos	uasgfp_5849	uasgfp_05_EGFPpositive.lsm (cropped)	1.5	115.91	51.73
uasgfpGFPpos	uasgfp_5850	uasgfp_05_EGFPpositive.lsm (cropped)	2.05	118.08	29.3
uasgfpGFPpos	uasgfp_5851	uasgfp_05_EGFPpositive.lsm (cropped)	0.735	67.32	52.65
uasgfpGFPpos	uasgfp_5852	uasgfp_05_EGFPpositive.lsm (cropped)	0.784	65.86	48.3
uasgfpGFPpos	uasgfp_5853	uasgfp_05_EGFPpositive.lsm (cropped)	2.47	129.82	28.42
uasgfpGFPpos	uasgfp_5854	uasgfp_05_EGFPpositive.lsm (cropped)	1.06	102.8	46.79
uasgfpGFPpos	uasgfp_5855	uasgfp_05_EGFPpositive.lsm (cropped)	2.6	122.78	65.56
uasgfpGFPpos	uasgfp_5856	uasgfp_05_EGFPpositive.lsm (cropped)	0.524	86.75	14.2
uasgfpGFPpos	uasgfp_5857	uasgfp_05_EGFPpositive.lsm (cropped)	0.411	83.24	14.16
uasgfpGFPpos	uasgfp_5858	uasgfp_05_EGFPpositive.lsm (cropped)	0.811	101.01	23.3
uasgfpGFPpos	uasgfp_5859	uasgfp_05_EGFPpositive.lsm (cropped)	0.638	74.99	23.08
uasgfpGFPpos	uasgfp_5860	uasgfp_05_EGFPpositive.lsm (cropped)	0.346	73.66	48.39
uasgfpGFPpos	uasgfp_5861	uasgfp_05_EGFPpositive.lsm (cropped)	2.3	94.3	14.83
uasgfpGFPpos	uasgfp_5862	uasgfp_05_EGFPpositive.lsm (cropped)	2.32	135.11	19.57
uasgfpGFPpos	uasgfp_5863	uasgfp_05_EGFPpositive.lsm (cropped)	0.87	90.91	30.55
uasgfpGFPpos	uasgfp_5864	uasgfp_05_EGFPpositive.lsm (cropped)	0.281	64.67	27.12
uasgfpGFPpos	uasgfp_5865	uasgfp_05_EGFPpositive.lsm (cropped)	3.5	122.12	35.93
uasgfpGFPpos	uasgfp_5866	uasgfp_05_EGFPpositive.lsm (cropped)	0.26	57.5	34.23
uasgfpGFPpos	uasgfp_5867	uasgfp_05_EGFPpositive.lsm (cropped)	0.779	65.76	37.56
uasgfpGFPpos	uasgfp_5868	uasgfp_05_EGFPpositive.lsm (cropped)	0.638	101.41	7.39
uasgfpGFPpos	uasgfp_5869	uasgfp_05_EGFPpositive.lsm (cropped)	1.21	119.83	29.47
uasgfpGFPpos	uasgfp_5870	uasgfp_05_EGFPpositive.lsm (cropped)	0.546	86.82	35.29
uasgfpGFPpos	uasgfp_5871	uasgfp_05_EGFPpositive.lsm (cropped)	0.26	80.58	34.29
uasgfpGFPpos	uasgfp_5872	uasgfp_05_EGFPpositive.lsm (cropped)	2.82	129.46	14.66
uasgfpGFPpos	uasgfp_5873	uasgfp_05_EGFPpositive.lsm (cropped)	1.3	108.36	15.84
uasgfpGFPpos	uasgfp_5874	uasgfp_05_EGFPpositive.lsm (cropped)	0.232	73.37	30.05
uasgfpGFPpos	uasgfp_5875	uasgfp_05_EGFPpositive.lsm (cropped)	1.54	88.53	43.44
uasgfpGFPpos	uasgfp_5876	uasgfp_05_EGFPpositive.lsm (cropped)	0.249	82.04	21.57
uasgfpGFPpos	uasgfp_5877	uasgfp_05_EGFPpositive.lsm (cropped)	0.243	69.6	44.04
uasgfpGFPpos	uasgfp_5878	uasgfp_05_EGFPpositive.lsm (cropped)	2.88	114.34	15.82
uasgfpGFPpos	uasgfp_5879	uasgfp_05_EGFPpositive.lsm (cropped)	0.465	72.01	56.55
uasgfpGFPpos	uasgfp_5880	uasgfp_05_EGFPpositive.lsm (cropped)	0.211	64.46	37.85
uasgfpGFPpos	uasgfp_5881	uasgfp_05_EGFPpositive.lsm (cropped)	0.919	120.75	55.73
uasgfpGFPpos	uasgfp_5882	uasgfp_05_EGFPpositive.lsm (cropped)	0.254	85.83	51.36
uasgfpGFPpos	uasgfp_5883	uasgfp_05_EGFPpositive.lsm (cropped)	0.573	108.2	18.27
uasgfpGFPpos	uasgfp_5884	uasgfp_05_EGFPpositive.lsm (cropped)	0.535	79.61	66.3
uasgfpGFPpos	uasgfp_5885	uasgfp_05_EGFPpositive.lsm (cropped)	0.449	98.36	39.08
uasgfpGFPpos	uasgfp_5886	uasgfp_05_EGFPpositive.lsm (cropped)	0.697	76.6	53.26
uasgfpGFPpos	uasgfp_5887	uasgfp_05_EGFPpositive.lsm (cropped)	3.15	79.98	68.51
uasgfpGFPpos	uasgfp_5888	uasgfp_05_EGFPpositive.lsm (cropped)	0.86	63.94	52.93
uasgfpGFPpos	uasgfp_5889	uasgfp_05_EGFPpositive.lsm (cropped)	1.18	69.31	48.66
uasgfpGFPpos	uasgfp_5890	uasgfp_05_EGFPpositive.lsm (cropped)	3.96	122.86	30.86
uasgfpGFPpos	uasgfp_5891	uasgfp_05_EGFPpositive.lsm (cropped)	0.2	71.14	37.32
uasgfpGFPpos	uasgfp_5892	uasgfp_05_EGFPpositive.lsm (cropped)	0.946	105.79	30.05
uasgfpGFPpos	uasgfp_5893	uasgfp_05_EGFPpositive.lsm (cropped)	1.24	68.61	67
uasgfpGFPpos	uasgfp_5894	uasgfp_05_EGFPpositive.lsm (cropped)	0.746	113.4	14.07
uasgfpGFPpos	uasgfp_5895	uasgfp_05_EGFPpositive.lsm (cropped)	0.211	67.9	80.36
uasgfpGFPpos	uasgfp_5896	uasgfp_05_EGFPpositive.lsm (cropped)	0.53	61.39	43.23
uasgfpGFPpos	uasgfp_5897	uasgfp_05_EGFPpositive.lsm (cropped)	0.227	102.19	11.64
uasgfpGFPpos	uasgfp_5898	uasgfp_05_EGFPpositive.lsm (cropped)	0.535	60.98	49.92
uasgfpGFPpos	uasgfp_7579	uasgfp_06_EGFPpositive.lsm (cropped)	0.281	129.52	28.19
uasgfpGFPpos	uasgfp_7580	uasgfp_06_EGFPpositive.lsm (cropped)	0.276	119.06	7.98
uasgfpGFPpos	uasgfp_7581	uasgfp_06_EGFPpositive.lsm (cropped)	0.741	101.6	27.32
uasgfpGFPpos	uasgfp_7582	uasgfp_06_EGFPpositive.lsm (cropped)	0.292	103.28	10.59
uasgfpGFPpos	uasgfp_7583	uasgfp_06_EGFPpositive.lsm (cropped)	5.85	148.51	38.45
uasgfpGFPpos	uasgfp_7584	uasgfp_06_EGFPpositive.lsm (cropped)	0.519	111.45	34.66
uasgfpGFPpos	uasgfp_7585	uasgfp_06_EGFPpositive.lsm (cropped)	1.59	129.31	64.27
uasgfpGFPpos	uasgfp_7586	uasgfp_06_EGFPpositive.lsm (cropped)	0.351	83.18	15.11
uasgfpGFPpos	uasgfp_7587	uasgfp_06_EGFPpositive.lsm (cropped)	0.346	113.95	11.66
uasgfpGFPpos	uasgfp_7588	uasgfp_06_EGFPpositive.lsm (cropped)	0.53	98.27	33.89
uasgfpGFPpos	uasgfp_7589	uasgfp_06_EGFPpositive.lsm (cropped)	2.23	115.58	23.91
uasgfpGFPpos	uasgfp_7590	uasgfp_06_EGFPpositive.lsm (cropped)	0.395	104.92	25.27
uasgfpGFPpos	uasgfp_7591	uasgfp_06_EGFPpositive.lsm (cropped)	0.205	94.11	15.47
uasgfpGFPpos	uasgfp_7592	uasgfp_06_EGFPpositive.lsm (cropped)	0.584	110.34	40.37
uasgfpGFPpos	uasgfp_7593	uasgfp_06_EGFPpositive.lsm (cropped)	2.14	134.17	55.04
uasgfpGFPpos	uasgfp_7594	uasgfp_06_EGFPpositive.lsm (cropped)	1.47	104.32	48.11
uasgfpGFPpos	uasgfp_7595	uasgfp_06_EGFPpositive.lsm (cropped)	0.314	82.36	24.53
uasgfpGFPpos	uasgfp_7596	uasgfp_06_EGFPpositive.lsm (cropped)	2.55	131.5	47.87
uasgfpGFPpos	uasgfp_7597	uasgfp_06_EGFPpositive.lsm (cropped)	1.47	120.61	41.54
uasgfpGFPpos	uasgfp_7598	uasgfp_06_EGFPpositive.lsm (cropped)	2.84	115.06	35.15
uasgfpGFPpos	uasgfp_7599	uasgfp_06_EGFPpositive.lsm (cropped)	0.265	89.71	44.33
uasgfpGFPpos	uasgfp_7600	uasgfp_06_EGFPpositive.lsm (cropped)	5.56	123.37	54.42
uasgfpGFPpos	uasgfp_7601	uasgfp_06_EGFPpositive.lsm (cropped)	1.01	105.95	35.27
uasgfpGFPpos	uasgfp_7602	uasgfp_06_EGFPpositive.lsm (cropped)	6.68	127.96	64.1
uasgfpGFPpos	uasgfp_7603	uasgfp_06_EGFPpositive.lsm (cropped)	0.816	104.19	45.14
uasgfpGFPpos	uasgfp_7604	uasgfp_06_EGFPpositive.lsm (cropped)	1.16	99.36	30.24
uasgfpGFPpos	uasgfp_7605	uasgfp_06_EGFPpositive.lsm (cropped)	0.222	123.49	14.76
uasgfpGFPpos	uasgfp_7606	uasgfp_06_EGFPpositive.lsm (cropped)	1.26	119.16	33.96
uasgfpGFPpos	uasgfp_7607	uasgfp_06_EGFPpositive.lsm (cropped)	1.16	126.33	13.48
uasgfpGFPpos	uasgfp_7608	uasgfp_06_EGFPpositive.lsm (cropped)	0.8	117.47	15.55
uasgfpGFPpos	uasgfp_7609	uasgfp_06_EGFPpositive.lsm (cropped)	1.32	107.46	42.05
uasgfpGFPpos	uasgfp_7610	uasgfp_06_EGFPpositive.lsm (cropped)	5.01	148.08	31.57
uasgfpGFPpos	uasgfp_7611	uasgfp_06_EGFPpositive.lsm (cropped)	1.48	107.27	49.47
uasgfpGFPpos	uasgfp_7612	uasgfp_06_EGFPpositive.lsm (cropped)	0.568	97.31	27.11
uasgfpGFPpos	uasgfp_7613	uasgfp_06_EGFPpositive.lsm (cropped)	3.63	129.22	51.74
uasgfpGFPpos	uasgfp_7614	uasgfp_06_EGFPpositive.lsm (cropped)	1.57	124.15	48.72
uasgfpGFPpos	uasgfp_7615	uasgfp_06_EGFPpositive.lsm (cropped)	0.66	91.34	45.53
uasgfpGFPpos	uasgfp_7616	uasgfp_06_EGFPpositive.lsm (cropped)	0.27	94.02	39.78
uasgfpGFPpos	uasgfp_7617	uasgfp_06_EGFPpositive.lsm (cropped)	2.09	100.91	45.94
uasgfpGFPpos	uasgfp_7618	uasgfp_06_EGFPpositive.lsm (cropped)	3.94	119.32	46.64
uasgfpGFPpos	uasgfp_7619	uasgfp_06_EGFPpositive.lsm (cropped)	2.72	117.06	46.77
uasgfpGFPpos	uasgfp_7620	uasgfp_06_EGFPpositive.lsm (cropped)	0.26	111.23	17.92
uasgfpGFPpos	uasgfp_7621	uasgfp_06_EGFPpositive.lsm (cropped)	0.676	110.79	19.54
uasgfpGFPpos	uasgfp_7622	uasgfp_06_EGFPpositive.lsm (cropped)	0.454	107.69	83.46
uasgfpGFPpos	uasgfp_7623	uasgfp_06_EGFPpositive.lsm (cropped)	0.935	125.66	77.39
uasgfpGFPpos	uasgfp_7624	uasgfp_06_EGFPpositive.lsm (cropped)	1.28	99.22	35.01
uasgfpGFPpos	uasgfp_7625	uasgfp_06_EGFPpositive.lsm (cropped)	0.357	88.03	19.11
uasgfpGFPpos	uasgfp_7626	uasgfp_06_EGFPpositive.lsm (cropped)	0.481	81.99	38.02
uasgfpGFPpos	uasgfp_7627	uasgfp_06_EGFPpositive.lsm (cropped)	0.584	104.51	32.9
uasgfpGFPpos	uasgfp_7628	uasgfp_06_EGFPpositive.lsm (cropped)	0.503	76.14	33.66
uasgfpGFPpos	uasgfp_7629	uasgfp_06_EGFPpositive.lsm (cropped)	0.308	84.19	29.33
uasgfpGFPpos	uasgfp_7630	uasgfp_06_EGFPpositive.lsm (cropped)	0.616	100.86	9.94
uasgfpGFPpos	uasgfp_7631	uasgfp_06_EGFPpositive.lsm (cropped)	0.487	86.91	54.96
uasgfpGFPpos	uasgfp_7632	uasgfp_06_EGFPpositive.lsm (cropped)	1.14	109.56	37.06
uasgfpGFPpos	uasgfp_7633	uasgfp_06_EGFPpositive.lsm (cropped)	1.25	116.47	18
uasgfpGFPpos	uasgfp_7634	uasgfp_06_EGFPpositive.lsm (cropped)	0.211	85.56	16.18
uasgfpGFPpos	uasgfp_7635	uasgfp_06_EGFPpositive.lsm (cropped)	3.64	145.72	33.07
uasgfpGFPpos	uasgfp_7636	uasgfp_06_EGFPpositive.lsm (cropped)	1.52	109.53	61.19
uasgfpGFPpos	uasgfp_7637	uasgfp_06_EGFPpositive.lsm (cropped)	9.51	125.01	58.35
uasgfpGFPpos	uasgfp_7638	uasgfp_06_EGFPpositive.lsm (cropped)	1.38	97.39	52.58
uasgfpGFPpos	uasgfp_7639	uasgfp_06_EGFPpositive.lsm (cropped)	0.4	78.04	14.8
uasgfpGFPpos	uasgfp_7640	uasgfp_06_EGFPpositive.lsm (cropped)	1.25	109	44.13
uasgfpGFPpos	uasgfp_7641	uasgfp_06_EGFPpositive.lsm (cropped)	0.211	82.28	20.08
uasgfpGFPpos	uasgfp_7642	uasgfp_06_EGFPpositive.lsm (cropped)	0.384	81.9	14.76
uasgfpGFPpos	uasgfp_7643	uasgfp_06_EGFPpositive.lsm (cropped)	2.18	115.24	40.89
uasgfpGFPpos	uasgfp_7644	uasgfp_06_EGFPpositive.lsm (cropped)	0.968	98.52	64.35
uasgfpGFPpos	uasgfp_7645	uasgfp_06_EGFPpositive.lsm (cropped)	3.27	121.72	68.15
uasgfpGFPpos	uasgfp_7646	uasgfp_06_EGFPpositive.lsm (cropped)	0.341	98.3	29.86
uasgfpGFPpos	uasgfp_7647	uasgfp_06_EGFPpositive.lsm (cropped)	0.6	121.47	34.31
uasgfpGFPpos	uasgfp_7648	uasgfp_06_EGFPpositive.lsm (cropped)	0.406	104.4	11.19
uasgfpGFPpos	uasgfp_7649	uasgfp_06_EGFPpositive.lsm (cropped)	0.416	89.99	11.43
uasgfpGFPpos	uasgfp_7650	uasgfp_06_EGFPpositive.lsm (cropped)	0.281	98.81	15.62
uasgfpGFPpos	uasgfp_7651	uasgfp_06_EGFPpositive.lsm (cropped)	1.57	120.04	45.73
uasgfpGFPpos	uasgfp_7652	uasgfp_06_EGFPpositive.lsm (cropped)	0.638	82.74	20.94
uasgfpGFPpos	uasgfp_7653	uasgfp_06_EGFPpositive.lsm (cropped)	0.205	109.13	29.08
uasgfpGFPpos	uasgfp_7654	uasgfp_06_EGFPpositive.lsm (cropped)	7.6	145.33	46.08
uasgfpGFPpos	uasgfp_7655	uasgfp_06_EGFPpositive.lsm (cropped)	0.351	81.52	38.89
uasgfpGFPpos	uasgfp_7656	uasgfp_06_EGFPpositive.lsm (cropped)	0.265	77.59	99
uasgfpGFPpos	uasgfp_7657	uasgfp_06_EGFPpositive.lsm (cropped)	0.33	77.44	74.61
uasgfpGFPpos	uasgfp_7658	uasgfp_06_EGFPpositive.lsm (cropped)	3.95	126.38	36.88
uasgfpGFPpos	uasgfp_7659	uasgfp_06_EGFPpositive.lsm (cropped)	0.946	102.5	48.53
uasgfpGFPpos	uasgfp_7660	uasgfp_06_EGFPpositive.lsm (cropped)	0.86	103.67	56.27
uasgfpGFPpos	uasgfp_7661	uasgfp_06_EGFPpositive.lsm (cropped)	2.51	129.71	25.69
uasgfpGFPpos	uasgfp_7662	uasgfp_06_EGFPpositive.lsm (cropped)	0.676	93.93	57.29
uasgfpGFPpos	uasgfp_7663	uasgfp_06_EGFPpositive.lsm (cropped)	0.243	100.02	44.02
uasgfpGFPpos	uasgfp_7664	uasgfp_06_EGFPpositive.lsm (cropped)	5.06	113.26	31.85
uasgfpGFPpos	uasgfp_7665	uasgfp_06_EGFPpositive.lsm (cropped)	3.1	98.37	63.86
uasgfpGFPpos	uasgfp_7666	uasgfp_06_EGFPpositive.lsm (cropped)	0.308	97.16	15.68
uasgfpGFPpos	uasgfp_7667	uasgfp_06_EGFPpositive.lsm (cropped)	0.708	108.03	10.76
uasgfpGFPpos	uasgfp_7668	uasgfp_06_EGFPpositive.lsm (cropped)	0.335	86.52	14.66
uasgfpGFPpos	uasgfp_7669	uasgfp_06_EGFPpositive.lsm (cropped)	4.12	127.62	123.57
uasgfpGFPpos	uasgfp_7670	uasgfp_06_EGFPpositive.lsm (cropped)	1.48	132.57	34.81
uasgfpGFPpos	uasgfp_7671	uasgfp_06_EGFPpositive.lsm (cropped)	1.04	127.76	43.36
uasgfpGFPpos	uasgfp_7672	uasgfp_06_EGFPpositive.lsm (cropped)	0.627	101.11	64.43
uasgfpGFPpos	uasgfp_7673	uasgfp_06_EGFPpositive.lsm (cropped)	1.78	122.82	21.4
uasgfpGFPpos	uasgfp_7674	uasgfp_06_EGFPpositive.lsm (cropped)	1.05	83.48	63.38
uasgfpGFPpos	uasgfp_7675	uasgfp_06_EGFPpositive.lsm (cropped)	0.308	88.18	39.12
uasgfpGFPpos	uasgfp_7676	uasgfp_06_EGFPpositive.lsm (cropped)	0.4	86.7	58.91
uasgfpGFPpos	uasgfp_7677	uasgfp_06_EGFPpositive.lsm (cropped)	1.87	99.54	48.35
uasgfpGFPpos	uasgfp_7678	uasgfp_06_EGFPpositive.lsm (cropped)	0.351	98.77	17.68
uasgfpGFPpos	uasgfp_7679	uasgfp_06_EGFPpositive.lsm (cropped)	1.24	111.97	30.08
uasgfpGFPpos	uasgfp_7680	uasgfp_06_EGFPpositive.lsm (cropped)	1.8	122.58	28.97
uasgfpGFPpos	uasgfp_7681	uasgfp_06_EGFPpositive.lsm (cropped)	4.82	133.78	61.47
uasgfpGFPpos	uasgfp_7682	uasgfp_06_EGFPpositive.lsm (cropped)	2.34	108.44	32.58
uasgfpGFPpos	uasgfp_7683	uasgfp_06_EGFPpositive.lsm (cropped)	1.96	120.26	29.98
uasgfpGFPpos	uasgfp_7684	uasgfp_06_EGFPpositive.lsm (cropped)	0.584	94.05	60.83
uasgfpGFPpos	uasgfp_7685	uasgfp_06_EGFPpositive.lsm (cropped)	1.3	92.61	48.93
uasgfpGFPpos	uasgfp_7686	uasgfp_06_EGFPpositive.lsm (cropped)	1.07	105.36	28.45
uasgfpGFPpos	uasgfp_7687	uasgfp_06_EGFPpositive.lsm (cropped)	1.91	133.86	20.05
uasgfpGFPpos	uasgfp_7688	uasgfp_06_EGFPpositive.lsm (cropped)	0.984	110.09	23.83
uasgfpGFPpos	uasgfp_7689	uasgfp_06_EGFPpositive.lsm (cropped)	0.314	76.4	76.64
uasgfpGFPpos	uasgfp_7690	uasgfp_06_EGFPpositive.lsm (cropped)	0.222	124.95	35.22
uasgfpGFPpos	uasgfp_7691	uasgfp_06_EGFPpositive.lsm (cropped)	0.384	93.83	26.79
uasgfpGFPpos	uasgfp_7692	uasgfp_06_EGFPpositive.lsm (cropped)	1.45	112.16	47.86
uasgfpGFPpos	uasgfp_7693	uasgfp_06_EGFPpositive.lsm (cropped)	4.04	121.27	65.63
uasgfpGFPpos	uasgfp_7694	uasgfp_06_EGFPpositive.lsm (cropped)	0.589	108.6	33.39
uasgfpGFPpos	uasgfp_7695	uasgfp_06_EGFPpositive.lsm (cropped)	0.368	102.49	24.32
uasgfpGFPpos	uasgfp_7696	uasgfp_06_EGFPpositive.lsm (cropped)	3.32	123.42	22.89
uasgfpGFPpos	uasgfp_7697	uasgfp_06_EGFPpositive.lsm (cropped)	4.03	142.51	14.2
uasgfpGFPpos	uasgfp_7698	uasgfp_06_EGFPpositive.lsm (cropped)	0.551	111.53	14.89
uasgfpGFPpos	uasgfp_7699	uasgfp_06_EGFPpositive.lsm (cropped)	0.357	82.36	35.98
uasgfpGFPpos	uasgfp_7700	uasgfp_06_EGFPpositive.lsm (cropped)	0.351	117.66	31.72
uasgfpGFPpos	uasgfp_7701	uasgfp_06_EGFPpositive.lsm (cropped)	1.52	121.02	49
uasgfpGFPpos	uasgfp_7702	uasgfp_06_EGFPpositive.lsm (cropped)	0.881	84.28	34.33
uasgfpGFPpos	uasgfp_7703	uasgfp_06_EGFPpositive.lsm (cropped)	0.465	86.99	33.13
uasgfpGFPpos	uasgfp_7704	uasgfp_06_EGFPpositive.lsm (cropped)	0.973	121.69	29.37
uasgfpGFPpos	uasgfp_7705	uasgfp_06_EGFPpositive.lsm (cropped)	0.276	78.39	11.41
uasgfpGFPpos	uasgfp_7706	uasgfp_06_EGFPpositive.lsm (cropped)	2.42	109.95	23.27
uasgfpGFPpos	uasgfp_7707	uasgfp_06_EGFPpositive.lsm (cropped)	1.1	118.9	15.6
uasgfpGFPpos	uasgfp_7708	uasgfp_06_EGFPpositive.lsm (cropped)	1.57	105.51	33.59
uasgfpGFPpos	uasgfp_8885	uasgfp_07_EGFPpositive.lsm (cropped)	1.11	130.78	32.42
uasgfpGFPpos	uasgfp_8886	uasgfp_07_EGFPpositive.lsm (cropped)	0.962	121.76	29.51
uasgfpGFPpos	uasgfp_8887	uasgfp_07_EGFPpositive.lsm (cropped)	0.254	79.17	33.77
uasgfpGFPpos	uasgfp_8888	uasgfp_07_EGFPpositive.lsm (cropped)	0.827	96.9	30.22
uasgfpGFPpos	uasgfp_8889	uasgfp_07_EGFPpositive.lsm (cropped)	4.08	141.19	56.84
uasgfpGFPpos	uasgfp_8890	uasgfp_07_EGFPpositive.lsm (cropped)	2.47	122.52	42.05
uasgfpGFPpos	uasgfp_8891	uasgfp_07_EGFPpositive.lsm (cropped)	0.422	132.49	25.94
uasgfpGFPpos	uasgfp_8892	uasgfp_07_EGFPpositive.lsm (cropped)	0.687	128.69	52.78
uasgfpGFPpos	uasgfp_8893	uasgfp_07_EGFPpositive.lsm (cropped)	3.22	134.63	85.35
uasgfpGFPpos	uasgfp_8894	uasgfp_07_EGFPpositive.lsm (cropped)	0.627	118.47	22.09
uasgfpGFPpos	uasgfp_8895	uasgfp_07_EGFPpositive.lsm (cropped)	0.551	120.6	35.24
uasgfpGFPpos	uasgfp_8896	uasgfp_07_EGFPpositive.lsm (cropped)	0.238	116.36	53.39
uasgfpGFPpos	uasgfp_8897	uasgfp_07_EGFPpositive.lsm (cropped)	0.562	107.89	74.59
uasgfpGFPpos	uasgfp_8898	uasgfp_07_EGFPpositive.lsm (cropped)	0.627	132.04	91.73
uasgfpGFPpos	uasgfp_8899	uasgfp_07_EGFPpositive.lsm (cropped)	0.481	124.38	27.35
uasgfpGFPpos	uasgfp_8900	uasgfp_07_EGFPpositive.lsm (cropped)	7	156.33	63.78
uasgfpGFPpos	uasgfp_8901	uasgfp_07_EGFPpositive.lsm (cropped)	0.86	133.36	51.83
uasgfpGFPpos	uasgfp_8902	uasgfp_07_EGFPpositive.lsm (cropped)	0.508	111.44	59.1
uasgfpGFPpos	uasgfp_8903	uasgfp_07_EGFPpositive.lsm (cropped)	2.83	143.32	50.8
uasgfpGFPpos	uasgfp_8904	uasgfp_07_EGFPpositive.lsm (cropped)	0.2	106.3	35.19
uasgfpGFPpos	uasgfp_8905	uasgfp_07_EGFPpositive.lsm (cropped)	12.41	153.47	39.12
uasgfpGFPpos	uasgfp_8906	uasgfp_07_EGFPpositive.lsm (cropped)	1.79	136.93	12.28
uasgfpGFPpos	uasgfp_8907	uasgfp_07_EGFPpositive.lsm (cropped)	0.573	101.39	26.79
uasgfpGFPpos	uasgfp_8908	uasgfp_07_EGFPpositive.lsm (cropped)	1.16	123.63	33.83
uasgfpGFPpos	uasgfp_8909	uasgfp_07_EGFPpositive.lsm (cropped)	1.31	134.93	70.75
uasgfpGFPpos	uasgfp_8910	uasgfp_07_EGFPpositive.lsm (cropped)	0.211	103.92	51.64
uasgfpGFPpos	uasgfp_8911	uasgfp_07_EGFPpositive.lsm (cropped)	2.35	147.71	45.01
uasgfpGFPpos	uasgfp_8912	uasgfp_07_EGFPpositive.lsm (cropped)	0.562	104.14	36.73
uasgfpGFPpos	uasgfp_8913	uasgfp_07_EGFPpositive.lsm (cropped)	0.989	116.03	61.66
uasgfpGFPpos	uasgfp_8914	uasgfp_07_EGFPpositive.lsm (cropped)	2.65	157.36	47.86
uasgfpGFPpos	uasgfp_8915	uasgfp_07_EGFPpositive.lsm (cropped)	2.45	162.24	36.64
uasgfpGFPpos	uasgfp_8916	uasgfp_07_EGFPpositive.lsm (cropped)	0.833	93.95	23.18
uasgfpGFPpos	uasgfp_8917	uasgfp_07_EGFPpositive.lsm (cropped)	0.254	102.91	26.28
uasgfpGFPpos	uasgfp_8918	uasgfp_07_EGFPpositive.lsm (cropped)	1.78	129.76	21.02
uasgfpGFPpos	uasgfp_8919	uasgfp_07_EGFPpositive.lsm (cropped)	2.86	142.05	26.89
uasgfpGFPpos	uasgfp_8920	uasgfp_07_EGFPpositive.lsm (cropped)	5.16	161.63	39.52
uasgfpGFPpos	uasgfp_8921	uasgfp_07_EGFPpositive.lsm (cropped)	0.579	130.42	41.09
uasgfpGFPpos	uasgfp_8922	uasgfp_07_EGFPpositive.lsm (cropped)	1.36	134.19	23.41
uasgfpGFPpos	uasgfp_8923	uasgfp_07_EGFPpositive.lsm (cropped)	1.14	125.09	41.61
uasgfpGFPpos	uasgfp_8924	uasgfp_07_EGFPpositive.lsm (cropped)	1.13	121.54	56.87
uasgfpGFPpos	uasgfp_8925	uasgfp_07_EGFPpositive.lsm (cropped)	3.61	145.08	109.65
uasgfpGFPpos	uasgfp_8926	uasgfp_07_EGFPpositive.lsm (cropped)	5.82	148.8	46.47
uasgfpGFPpos	uasgfp_8927	uasgfp_07_EGFPpositive.lsm (cropped)	2.02	129.19	35.6
uasgfpGFPpos	uasgfp_8928	uasgfp_07_EGFPpositive.lsm (cropped)	0.46	116.29	45.81
uasgfpGFPpos	uasgfp_8929	uasgfp_07_EGFPpositive.lsm (cropped)	1.39	128.27	44.6
uasgfpGFPpos	uasgfp_8930	uasgfp_07_EGFPpositive.lsm (cropped)	0.232	128.26	60.05
uasgfpGFPpos	uasgfp_8931	uasgfp_07_EGFPpositive.lsm (cropped)	1.98	130.26	41.06
uasgfpGFPpos	uasgfp_8932	uasgfp_07_EGFPpositive.lsm (cropped)	0.551	120.06	14.6
uasgfpGFPpos	uasgfp_8933	uasgfp_07_EGFPpositive.lsm (cropped)	3	141.99	34.62
uasgfpGFPpos	uasgfp_8934	uasgfp_07_EGFPpositive.lsm (cropped)	2.56	134.02	26.44
uasgfpGFPpos	uasgfp_8935	uasgfp_07_EGFPpositive.lsm (cropped)	0.643	88.08	65.45
uasgfpGFPpos	uasgfp_8936	uasgfp_07_EGFPpositive.lsm (cropped)	5.27	152.6	32.01
uasgfpGFPpos	uasgfp_8937	uasgfp_07_EGFPpositive.lsm (cropped)	1.02	127.13	19.05
uasgfpGFPpos	uasgfp_8938	uasgfp_07_EGFPpositive.lsm (cropped)	2.1	120.59	36.13
uasgfpGFPpos	uasgfp_8939	uasgfp_07_EGFPpositive.lsm (cropped)	0.227	88.24	19.9
uasgfpGFPpos	uasgfp_8940	uasgfp_07_EGFPpositive.lsm (cropped)	10.44	155.16	45.88
uasgfpGFPpos	uasgfp_8941	uasgfp_07_EGFPpositive.lsm (cropped)	0.665	132.04	11.29
uasgfpGFPpos	uasgfp_8942	uasgfp_07_EGFPpositive.lsm (cropped)	2.08	147.77	74.08
uasgfpGFPpos	uasgfp_8943	uasgfp_07_EGFPpositive.lsm (cropped)	4.29	140.59	26.11
uasgfpGFPpos	uasgfp_8944	uasgfp_07_EGFPpositive.lsm (cropped)	0.2	82.65	26.57
uasgfpGFPpos	uasgfp_8945	uasgfp_07_EGFPpositive.lsm (cropped)	0.357	116.11	20.98
uasgfpGFPpos	uasgfp_8946	uasgfp_07_EGFPpositive.lsm (cropped)	3.01	140.16	65.65
uasgfpGFPpos	uasgfp_8947	uasgfp_07_EGFPpositive.lsm (cropped)	1.07	127.34	20.9
uasgfpGFPpos	uasgfp_8948	uasgfp_07_EGFPpositive.lsm (cropped)	1.77	127	26.03
uasgfpGFPpos	uasgfp_8949	uasgfp_07_EGFPpositive.lsm (cropped)	1.54	118.73	40.95
uasgfpGFPpos	uasgfp_8950	uasgfp_07_EGFPpositive.lsm (cropped)	0.384	119.56	35.42
uasgfpGFPpos	uasgfp_8951	uasgfp_07_EGFPpositive.lsm (cropped)	1.57	137.81	46.12
uasgfpGFPpos	uasgfp_8952	uasgfp_07_EGFPpositive.lsm (cropped)	8.14	159	56.22
uasgfpGFPpos	uasgfp_8953	uasgfp_07_EGFPpositive.lsm (cropped)	9.09	158.32	42.46
uasgfpGFPpos	uasgfp_8954	uasgfp_07_EGFPpositive.lsm (cropped)	2.21	120.22	24.87
uasgfpGFPpos	uasgfp_8955	uasgfp_07_EGFPpositive.lsm (cropped)	2.59	108.27	30.48
uasgfpGFPpos	uasgfp_8956	uasgfp_07_EGFPpositive.lsm (cropped)	0.638	110.36	39.28
uasgfpGFPpos	uasgfp_8957	uasgfp_07_EGFPpositive.lsm (cropped)	0.681	110.86	23.6
uasgfpGFPpos	uasgfp_8958	uasgfp_07_EGFPpositive.lsm (cropped)	0.519	107.93	26.1
uasgfpGFPpos	uasgfp_8959	uasgfp_07_EGFPpositive.lsm (cropped)	7.96	149.64	35.35
uasgfpGFPpos	uasgfp_8960	uasgfp_07_EGFPpositive.lsm (cropped)	0.546	100.17	44.61
uasgfpGFPpos	uasgfp_8961	uasgfp_07_EGFPpositive.lsm (cropped)	8.12	151.38	25.9
uasgfpGFPpos	uasgfp_8962	uasgfp_07_EGFPpositive.lsm (cropped)	1.42	114.09	75.3
uasgfpGFPpos	uasgfp_8963	uasgfp_07_EGFPpositive.lsm (cropped)	0.714	101.04	67.81
uasgfpGFPpos	uasgfp_8964	uasgfp_07_EGFPpositive.lsm (cropped)	0.557	89.86	39.15
uasgfpGFPpos	uasgfp_8965	uasgfp_07_EGFPpositive.lsm (cropped)	0.454	103.55	26.5
uasgfpGFPpos	uasgfp_8966	uasgfp_07_EGFPpositive.lsm (cropped)	0.908	134.24	15.14
uasgfpGFPpos	uasgfp_8967	uasgfp_07_EGFPpositive.lsm (cropped)	0.205	101.11	12.39
uasgfpGFPpos	uasgfp_8968	uasgfp_07_EGFPpositive.lsm (cropped)	2.17	135.96	21.05
uasgfpGFPpos	uasgfp_8969	uasgfp_07_EGFPpositive.lsm (cropped)	0.697	129.09	19.97
uasgfpGFPpos	uasgfp_8970	uasgfp_07_EGFPpositive.lsm (cropped)	0.514	110.35	15.65
uasgfpGFPpos	uasgfp_8971	uasgfp_07_EGFPpositive.lsm (cropped)	0.752	115.29	45.12
uasgfpGFPpos	uasgfp_8972	uasgfp_07_EGFPpositive.lsm (cropped)	0.746	109.28	60.49
uasgfpGFPpos	uasgfp_8973	uasgfp_07_EGFPpositive.lsm (cropped)	0.6	106.45	60.77
uasgfpGFPpos	uasgfp_8974	uasgfp_07_EGFPpositive.lsm (cropped)	0.568	127.71	43.8
uasgfpGFPpos	uasgfp_8975	uasgfp_07_EGFPpositive.lsm (cropped)	1.02	128.87	28.84
uasgfpGFPpos	uasgfp_8976	uasgfp_07_EGFPpositive.lsm (cropped)	0.562	92.52	82.95
uasgfpGFPpos	uasgfp_8977	uasgfp_07_EGFPpositive.lsm (cropped)	0.519	94.69	40.66
uasgfpGFPpos	uasgfp_8978	uasgfp_07_EGFPpositive.lsm (cropped)	0.303	93.5	28.25
uasgfpGFPpos	uasgfp_8979	uasgfp_07_EGFPpositive.lsm (cropped)	0.503	97.04	15.84
uasgfpGFPpos	uasgfp_8980	uasgfp_07_EGFPpositive.lsm (cropped)	0.741	118.11	16.94
uasgfpGFPpos	uasgfp_8981	uasgfp_07_EGFPpositive.lsm (cropped)	1.12	140.19	21.88
uasgfpGFPpos	uasgfp_8982	uasgfp_07_EGFPpositive.lsm (cropped)	0.67	101.9	16.31
uasgfpGFPpos	uasgfp_8983	uasgfp_07_EGFPpositive.lsm (cropped)	0.2	109.89	9.22
uasgfpGFPpos	uasgfp_8984	uasgfp_07_EGFPpositive.lsm (cropped)	1.04	117.73	27.49
uasgfpGFPpos	uasgfp_8985	uasgfp_07_EGFPpositive.lsm (cropped)	1.01	127.1	43.22
uasgfpGFPpos	uasgfp_8986	uasgfp_07_EGFPpositive.lsm (cropped)	2.78	143.87	27.87
uasgfpGFPpos	uasgfp_8987	uasgfp_07_EGFPpositive.lsm (cropped)	0.438	103.32	43.99
uasgfpGFPpos	uasgfp_8988	uasgfp_07_EGFPpositive.lsm (cropped)	0.249	81.91	40.04
uasgfpGFPpos	uasgfp_8989	uasgfp_07_EGFPpositive.lsm (cropped)	0.303	90.09	14.55
uasgfpGFPpos	uasgfp_8990	uasgfp_07_EGFPpositive.lsm (cropped)	3.48	144.68	31.03
uasgfpGFPpos	uasgfp_8991	uasgfp_07_EGFPpositive.lsm (cropped)	2.29	101.29	24.85
uasgfpGFPpos	uasgfp_8992	uasgfp_07_EGFPpositive.lsm (cropped)	0.589	88.45	10.03
uasgfpGFPpos	uasgfp_8993	uasgfp_07_EGFPpositive.lsm (cropped)	0.2	121.27	10.86
uasgfpGFPpos	uasgfp_10562	uasgfp_08_EGFPpositive.lsm (cropped)	2.64	103.63	46.93
uasgfpGFPpos	uasgfp_10563	uasgfp_08_EGFPpositive.lsm (cropped)	0.443	103.6	34.87
uasgfpGFPpos	uasgfp_10564	uasgfp_08_EGFPpositive.lsm (cropped)	0.227	74.86	20.6
uasgfpGFPpos	uasgfp_10565	uasgfp_08_EGFPpositive.lsm (cropped)	0.26	65.4	28.04
uasgfpGFPpos	uasgfp_10566	uasgfp_08_EGFPpositive.lsm (cropped)	0.579	79.89	49.97
uasgfpGFPpos	uasgfp_10567	uasgfp_08_EGFPpositive.lsm (cropped)	0.8	85.74	37.74
uasgfpGFPpos	uasgfp_10568	uasgfp_08_EGFPpositive.lsm (cropped)	0.249	68.52	44.93
uasgfpGFPpos	uasgfp_10569	uasgfp_08_EGFPpositive.lsm (cropped)	2.48	100.63	66.26
uasgfpGFPpos	uasgfp_10570	uasgfp_08_EGFPpositive.lsm (cropped)	5.48	124.19	75.41
uasgfpGFPpos	uasgfp_10571	uasgfp_08_EGFPpositive.lsm (cropped)	4.02	124.04	103.8
uasgfpGFPpos	uasgfp_10572	uasgfp_08_EGFPpositive.lsm (cropped)	1.74	96.74	72.06
uasgfpGFPpos	uasgfp_10573	uasgfp_08_EGFPpositive.lsm (cropped)	0.465	98.85	35.7
uasgfpGFPpos	uasgfp_10574	uasgfp_08_EGFPpositive.lsm (cropped)	1.4	85.44	64.64
uasgfpGFPpos	uasgfp_10575	uasgfp_08_EGFPpositive.lsm (cropped)	2.44	91.01	112.06
uasgfpGFPpos	uasgfp_10576	uasgfp_08_EGFPpositive.lsm (cropped)	0.33	61.08	67.34
uasgfpGFPpos	uasgfp_10577	uasgfp_08_EGFPpositive.lsm (cropped)	3.77	97.99	91.4
uasgfpGFPpos	uasgfp_10578	uasgfp_08_EGFPpositive.lsm (cropped)	0.579	75.52	29.9
uasgfpGFPpos	uasgfp_10579	uasgfp_08_EGFPpositive.lsm (cropped)	0.211	64.54	97.64
uasgfpGFPpos	uasgfp_10580	uasgfp_08_EGFPpositive.lsm (cropped)	2.97	83.63	90.92
uasgfpGFPpos	uasgfp_10581	uasgfp_08_EGFPpositive.lsm (cropped)	1.35	94.61	71.68
uasgfpGFPpos	uasgfp_10582	uasgfp_08_EGFPpositive.lsm (cropped)	3.38	91.59	63.86
uasgfpGFPpos	uasgfp_10583	uasgfp_08_EGFPpositive.lsm (cropped)	1.47	91.1	76.46
uasgfpGFPpos	uasgfp_10584	uasgfp_08_EGFPpositive.lsm (cropped)	3.21	96.25	94.35
uasgfpGFPpos	uasgfp_10585	uasgfp_08_EGFPpositive.lsm (cropped)	5.64	109.88	88.11
uasgfpGFPpos	uasgfp_10586	uasgfp_08_EGFPpositive.lsm (cropped)	0.503	75.14	28.42
uasgfpGFPpos	uasgfp_10587	uasgfp_08_EGFPpositive.lsm (cropped)	0.33	60.11	8.15
uasgfpGFPpos	uasgfp_10588	uasgfp_08_EGFPpositive.lsm (cropped)	0.643	69.63	26.41
uasgfpGFPpos	uasgfp_10589	uasgfp_08_EGFPpositive.lsm (cropped)	1.36	82.67	81.06
uasgfpGFPpos	uasgfp_10590	uasgfp_08_EGFPpositive.lsm (cropped)	0.53	82.08	28.78
uasgfpGFPpos	uasgfp_10591	uasgfp_08_EGFPpositive.lsm (cropped)	0.308	62.91	55.75
uasgfpGFPpos	uasgfp_10592	uasgfp_08_EGFPpositive.lsm (cropped)	6.75	103.61	64.84
uasgfpGFPpos	uasgfp_10593	uasgfp_08_EGFPpositive.lsm (cropped)	0.2	63.14	67.14
uasgfpGFPpos	uasgfp_10594	uasgfp_08_EGFPpositive.lsm (cropped)	0.968	80.6	32.56
uasgfpGFPpos	uasgfp_10595	uasgfp_08_EGFPpositive.lsm (cropped)	0.216	67.15	9.6
uasgfpGFPpos	uasgfp_10596	uasgfp_08_EGFPpositive.lsm (cropped)	1.17	81.14	51.61
uasgfpGFPpos	uasgfp_10597	uasgfp_08_EGFPpositive.lsm (cropped)	0.411	72.42	21.67
uasgfpGFPpos	uasgfp_10598	uasgfp_08_EGFPpositive.lsm (cropped)	0.216	57.83	88
uasgfpGFPpos	uasgfp_10599	uasgfp_08_EGFPpositive.lsm (cropped)	0.6	79.05	32.77
uasgfpGFPpos	uasgfp_10600	uasgfp_08_EGFPpositive.lsm (cropped)	0.265	99.94	18.29
uasgfpGFPpos	uasgfp_10601	uasgfp_08_EGFPpositive.lsm (cropped)	0.8	84.63	62.84
uasgfpGFPpos	uasgfp_10602	uasgfp_08_EGFPpositive.lsm (cropped)	1.14	78.56	60.49
uasgfpGFPpos	uasgfp_10603	uasgfp_08_EGFPpositive.lsm (cropped)	0.427	86.32	22.22
uasgfpGFPpos	uasgfp_10604	uasgfp_08_EGFPpositive.lsm (cropped)	4.82	78.82	61.24
uasgfpGFPpos	uasgfp_10605	uasgfp_08_EGFPpositive.lsm (cropped)	0.481	78.94	61.81
uasgfpGFPpos	uasgfp_10606	uasgfp_08_EGFPpositive.lsm (cropped)	0.6	86.52	73.37
uasgfpGFPpos	uasgfp_10607	uasgfp_08_EGFPpositive.lsm (cropped)	1.05	93.51	25.19
uasgfpGFPpos	uasgfp_10608	uasgfp_08_EGFPpositive.lsm (cropped)	0.292	111.56	33.41
uasgfpGFPpos	uasgfp_10609	uasgfp_08_EGFPpositive.lsm (cropped)	2.06	102.03	89.07
uasgfpGFPpos	uasgfp_10610	uasgfp_08_EGFPpositive.lsm (cropped)	0.454	62.23	76.12
uasgfpGFPpos	uasgfp_10611	uasgfp_08_EGFPpositive.lsm (cropped)	0.438	68.51	150.54
uasgfpGFPpos	uasgfp_10612	uasgfp_08_EGFPpositive.lsm (cropped)	5.12	105.83	92.21
uasgfpGFPpos	uasgfp_10613	uasgfp_08_EGFPpositive.lsm (cropped)	0.476	65.18	29.14
uasgfpGFPpos	uasgfp_10614	uasgfp_08_EGFPpositive.lsm (cropped)	4.43	76.79	82.4
uasgfpGFPpos	uasgfp_10615	uasgfp_08_EGFPpositive.lsm (cropped)	4.14	108.27	87.01
uasgfpGFPpos	uasgfp_10616	uasgfp_08_EGFPpositive.lsm (cropped)	2.67	111.22	38.43
uasgfpGFPpos	uasgfp_10617	uasgfp_08_EGFPpositive.lsm (cropped)	2.4	83.73	156.35
uasgfpGFPpos	uasgfp_10618	uasgfp_08_EGFPpositive.lsm (cropped)	0.27	101.78	12.62
uasgfpGFPpos	uasgfp_10619	uasgfp_08_EGFPpositive.lsm (cropped)	1.24	81.94	69.1
uasgfpGFPpos	uasgfp_10620	uasgfp_08_EGFPpositive.lsm (cropped)	1.68	99.25	85.25
uasgfpGFPpos	uasgfp_10621	uasgfp_08_EGFPpositive.lsm (cropped)	7.78	110.65	83.89
uasgfpGFPpos	uasgfp_10622	uasgfp_08_EGFPpositive.lsm (cropped)	0.551	73.07	35.33
uasgfpGFPpos	uasgfp_10623	uasgfp_08_EGFPpositive.lsm (cropped)	7.36	98.8	31.45
uasgfpGFPpos	uasgfp_10624	uasgfp_08_EGFPpositive.lsm (cropped)	0.411	116.08	6.29
uasgfpGFPpos	uasgfp_10625	uasgfp_08_EGFPpositive.lsm (cropped)	2.17	87.17	35.16
uasgfpGFPpos	uasgfp_10626	uasgfp_08_EGFPpositive.lsm (cropped)	2.02	88.28	57.36
uasgfpGFPpos	uasgfp_10627	uasgfp_08_EGFPpositive.lsm (cropped)	7.12	83.93	56.36
uasgfpGFPpos	uasgfp_10628	uasgfp_08_EGFPpositive.lsm (cropped)	1.36	79.43	43.21
uasgfpGFPpos	uasgfp_10629	uasgfp_08_EGFPpositive.lsm (cropped)	0.746	80.71	45.68
uasgfpGFPpos	uasgfp_10630	uasgfp_08_EGFPpositive.lsm (cropped)	1.11	82.75	52.55
uasgfpGFPpos	uasgfp_10631	uasgfp_08_EGFPpositive.lsm (cropped)	0.243	112.16	8.13
uasgfpGFPpos	uasgfp_10632	uasgfp_08_EGFPpositive.lsm (cropped)	0.8	86.24	49.74
uasgfpGFPpos	uasgfp_10633	uasgfp_08_EGFPpositive.lsm (cropped)	0.287	59.53	12.47
uasgfpGFPpos	uasgfp_10634	uasgfp_08_EGFPpositive.lsm (cropped)	0.368	75.43	68.24
uasgfpGFPpos	uasgfp_10635	uasgfp_08_EGFPpositive.lsm (cropped)	1.81	91.9	77.72
uasgfpGFPpos	uasgfp_10636	uasgfp_08_EGFPpositive.lsm (cropped)	2.57	103.03	67.17
uasgfpGFPpos	uasgfp_10637	uasgfp_08_EGFPpositive.lsm (cropped)	5.36	131.04	86.97
uasgfpGFPpos	uasgfp_11672	uasgfp_09_EGFPpositive.lsm (cropped)	0.265	74	101.45
uasgfpGFPpos	uasgfp_11673	uasgfp_09_EGFPpositive.lsm (cropped)	0.232	115.63	116.07
uasgfpGFPpos	uasgfp_11674	uasgfp_09_EGFPpositive.lsm (cropped)	1.29	92.82	62.35
uasgfpGFPpos	uasgfp_11675	uasgfp_09_EGFPpositive.lsm (cropped)	1.07	111.53	38.2
uasgfpGFPpos	uasgfp_11676	uasgfp_09_EGFPpositive.lsm (cropped)	0.595	90.75	63.48
uasgfpGFPpos	uasgfp_11677	uasgfp_09_EGFPpositive.lsm (cropped)	2.12	101.15	146.98
uasgfpGFPpos	uasgfp_11678	uasgfp_09_EGFPpositive.lsm (cropped)	0.892	87.88	77.45
uasgfpGFPpos	uasgfp_11679	uasgfp_09_EGFPpositive.lsm (cropped)	3.69	126.98	31.48
uasgfpGFPpos	uasgfp_11680	uasgfp_09_EGFPpositive.lsm (cropped)	1.28	106.09	68.58
uasgfpGFPpos	uasgfp_11681	uasgfp_09_EGFPpositive.lsm (cropped)	0.395	101.32	23.78
uasgfpGFPpos	uasgfp_11682	uasgfp_09_EGFPpositive.lsm (cropped)	3.2	111.41	71.68
uasgfpGFPpos	uasgfp_11683	uasgfp_09_EGFPpositive.lsm (cropped)	0.373	73.72	43.96
uasgfpGFPpos	uasgfp_11684	uasgfp_09_EGFPpositive.lsm (cropped)	0.497	113.96	15.57
uasgfpGFPpos	uasgfp_11685	uasgfp_09_EGFPpositive.lsm (cropped)	0.265	78.9	34.51
uasgfpGFPpos	uasgfp_11686	uasgfp_09_EGFPpositive.lsm (cropped)	0.281	78.69	34.58
uasgfpGFPpos	uasgfp_11687	uasgfp_09_EGFPpositive.lsm (cropped)	0.346	79.17	14.97
uasgfpGFPpos	uasgfp_11688	uasgfp_09_EGFPpositive.lsm (cropped)	0.411	83.68	87.87
uasgfpGFPpos	uasgfp_11689	uasgfp_09_EGFPpositive.lsm (cropped)	1.64	92.38	34.04
uasgfpGFPpos	uasgfp_11690	uasgfp_09_EGFPpositive.lsm (cropped)	0.811	112.9	26.81
uasgfpGFPpos	uasgfp_11691	uasgfp_09_EGFPpositive.lsm (cropped)	0.854	91.7	36.4
uasgfpGFPpos	uasgfp_11692	uasgfp_09_EGFPpositive.lsm (cropped)	1.98	109.02	34.85
uasgfpGFPpos	uasgfp_11693	uasgfp_09_EGFPpositive.lsm (cropped)	0.492	110.91	7.18
uasgfpGFPpos	uasgfp_11694	uasgfp_09_EGFPpositive.lsm (cropped)	1.66	108.72	30.74
uasgfpGFPpos	uasgfp_11695	uasgfp_09_EGFPpositive.lsm (cropped)	1.14	111.73	53.19
uasgfpGFPpos	uasgfp_11696	uasgfp_09_EGFPpositive.lsm (cropped)	1.49	117.96	108.41
uasgfpGFPpos	uasgfp_11697	uasgfp_09_EGFPpositive.lsm (cropped)	0.368	110.59	28.35
uasgfpGFPpos	uasgfp_11698	uasgfp_09_EGFPpositive.lsm (cropped)	5.37	123.97	100.6
uasgfpGFPpos	uasgfp_11699	uasgfp_09_EGFPpositive.lsm (cropped)	0.519	89.71	45.04
uasgfpGFPpos	uasgfp_11700	uasgfp_09_EGFPpositive.lsm (cropped)	4.04	125.28	71.02
uasgfpGFPpos	uasgfp_11701	uasgfp_09_EGFPpositive.lsm (cropped)	4.77	127.16	68.16
uasgfpGFPpos	uasgfp_11702	uasgfp_09_EGFPpositive.lsm (cropped)	0.433	96.16	23.24
uasgfpGFPpos	uasgfp_11703	uasgfp_09_EGFPpositive.lsm (cropped)	4.21	120.01	77.61
uasgfpGFPpos	uasgfp_11704	uasgfp_09_EGFPpositive.lsm (cropped)	0.33	88.77	20.69
uasgfpGFPpos	uasgfp_11705	uasgfp_09_EGFPpositive.lsm (cropped)	0.4	73.89	93.05
uasgfpGFPpos	uasgfp_11706	uasgfp_09_EGFPpositive.lsm (cropped)	1.46	98.42	68.24
uasgfpGFPpos	uasgfp_11707	uasgfp_09_EGFPpositive.lsm (cropped)	0.595	98.48	106.42
uasgfpGFPpos	uasgfp_11708	uasgfp_09_EGFPpositive.lsm (cropped)	7.99	117.42	53.85
uasgfpGFPpos	uasgfp_11709	uasgfp_09_EGFPpositive.lsm (cropped)	0.86	79.66	38.9
uasgfpGFPpos	uasgfp_11710	uasgfp_09_EGFPpositive.lsm (cropped)	1.42	92.1	28.62
uasgfpGFPpos	uasgfp_11711	uasgfp_09_EGFPpositive.lsm (cropped)	3.2	106.33	46.16
uasgfpGFPpos	uasgfp_11712	uasgfp_09_EGFPpositive.lsm (cropped)	1.03	89.37	57.12
uasgfpGFPpos	uasgfp_11713	uasgfp_09_EGFPpositive.lsm (cropped)	0.205	89.55	19.45
uasgfpGFPpos	uasgfp_11714	uasgfp_09_EGFPpositive.lsm (cropped)	2.96	111.27	63.83
uasgfpGFPpos	uasgfp_11715	uasgfp_09_EGFPpositive.lsm (cropped)	0.427	100.16	70.76
uasgfpGFPpos	uasgfp_11716	uasgfp_09_EGFPpositive.lsm (cropped)	6.86	111.86	82.43
uasgfpGFPpos	uasgfp_11717	uasgfp_09_EGFPpositive.lsm (cropped)	0.26	78.69	52.96
uasgfpGFPpos	uasgfp_11718	uasgfp_09_EGFPpositive.lsm (cropped)	1.11	84.51	76.92
uasgfpGFPpos	uasgfp_11719	uasgfp_09_EGFPpositive.lsm (cropped)	0.341	86.6	54.13
uasgfpGFPpos	uasgfp_11720	uasgfp_09_EGFPpositive.lsm (cropped)	2.96	98.21	55.97
uasgfpGFPpos	uasgfp_11721	uasgfp_09_EGFPpositive.lsm (cropped)	0.519	99.13	39.09
uasgfpGFPpos	uasgfp_11722	uasgfp_09_EGFPpositive.lsm (cropped)	0.222	89.49	13.73
uasgfpGFPpos	uasgfp_11723	uasgfp_09_EGFPpositive.lsm (cropped)	0.362	95.34	91.24
uasgfpGFPpos	uasgfp_11724	uasgfp_09_EGFPpositive.lsm (cropped)	1.49	132.45	20.79
uasgfpGFPpos	uasgfp_11725	uasgfp_09_EGFPpositive.lsm (cropped)	0.551	103.15	79.29
uasgfpGFPpos	uasgfp_11726	uasgfp_09_EGFPpositive.lsm (cropped)	0.222	76.24	36.34
uasgfpGFPpos	uasgfp_11727	uasgfp_09_EGFPpositive.lsm (cropped)	1.2	76.04	60.72
uasgfpGFPpos	uasgfp_11728	uasgfp_09_EGFPpositive.lsm (cropped)	2.32	86.54	63.9
uasgfpGFPpos	uasgfp_11729	uasgfp_09_EGFPpositive.lsm (cropped)	0.47	94.59	19.82
uasgfpGFPpos	uasgfp_11730	uasgfp_09_EGFPpositive.lsm (cropped)	1.08	118.63	38.49
uasgfpGFPpos	uasgfp_11731	uasgfp_09_EGFPpositive.lsm (cropped)	1.81	101.1	121.36
uasgfpGFPpos	uasgfp_11732	uasgfp_09_EGFPpositive.lsm (cropped)	1.3	91.51	106.46
uasgfpGFPpos	uasgfp_11733	uasgfp_09_EGFPpositive.lsm (cropped)	0.384	84.49	61.99
uasgfpGFPpos	uasgfp_11734	uasgfp_09_EGFPpositive.lsm (cropped)	0.67	101.99	89.63
uasgfpGFPpos	uasgfp_11735	uasgfp_09_EGFPpositive.lsm (cropped)	2.06	119.41	57.04
uasgfpGFPpos	uasgfp_11736	uasgfp_09_EGFPpositive.lsm (cropped)	2.94	133.7	85.14
uasgfpGFPpos	uasgfp_11737	uasgfp_09_EGFPpositive.lsm (cropped)	0.292	84.69	64.87
uasgfpGFPpos	uasgfp_11738	uasgfp_09_EGFPpositive.lsm (cropped)	1.42	111.67	54.76
uasgfpGFPpos	uasgfp_11739	uasgfp_09_EGFPpositive.lsm (cropped)	0.903	102.26	36.31
uasgfpGFPpos	uasgfp_11740	uasgfp_09_EGFPpositive.lsm (cropped)	3.26	102.5	29.43
uasgfpGFPpos	uasgfp_11741	uasgfp_09_EGFPpositive.lsm (cropped)	3.59	116.1	73.83
uasgfpGFPpos	uasgfp_11742	uasgfp_09_EGFPpositive.lsm (cropped)	1.78	81.83	54.57
uasgfpGFPpos	uasgfp_11743	uasgfp_09_EGFPpositive.lsm (cropped)	0.465	71.95	45.03
uasgfpGFPpos	uasgfp_11744	uasgfp_09_EGFPpositive.lsm (cropped)	0.638	84.66	32.55
uasgfpGFPpos	uasgfp_11745	uasgfp_09_EGFPpositive.lsm (cropped)	0.303	84.07	73.3
uasgfpGFPpos	uasgfp_11746	uasgfp_09_EGFPpositive.lsm (cropped)	12.22	150.75	93.12
uasgfpGFPpos	uasgfp_11747	uasgfp_09_EGFPpositive.lsm (cropped)	0.243	73.84	52
uasgfpGFPpos	uasgfp_11748	uasgfp_09_EGFPpositive.lsm (cropped)	0.211	77.54	25.69
uasgfpGFPpos	uasgfp_11749	uasgfp_09_EGFPpositive.lsm (cropped)	1.61	92.81	125.73
uasgfpGFPpos	uasgfp_11750	uasgfp_09_EGFPpositive.lsm (cropped)	0.86	75.54	18.97
uasgfpGFPpos	uasgfp_11751	uasgfp_09_EGFPpositive.lsm (cropped)	0.2	77.68	17.38
uasgfpGFPpos	uasgfp_11752	uasgfp_09_EGFPpositive.lsm (cropped)	0.616	98.56	30.39
uasgfpGFPpos	uasgfp_11753	uasgfp_09_EGFPpositive.lsm (cropped)	4.26	135.4	30.7
uasgfpGFPpos	uasgfp_11754	uasgfp_09_EGFPpositive.lsm (cropped)	0.205	93.03	19.24
uasgfpGFPpos	uasgfp_11755	uasgfp_09_EGFPpositive.lsm (cropped)	0.568	108.15	30.14
uasgfpGFPpos	uasgfp_12935	uasgfp_10_EGFPpositive.lsm (cropped)	1.15	63.92	7.25
uasgfpGFPpos	uasgfp_12936	uasgfp_10_EGFPpositive.lsm (cropped)	0.211	72.36	5.46
uasgfpGFPpos	uasgfp_12937	uasgfp_10_EGFPpositive.lsm (cropped)	0.665	98.76	27.95
uasgfpGFPpos	uasgfp_12938	uasgfp_10_EGFPpositive.lsm (cropped)	0.232	63.72	14.86
uasgfpGFPpos	uasgfp_12939	uasgfp_10_EGFPpositive.lsm (cropped)	1.62	105.11	8.07
uasgfpGFPpos	uasgfp_12940	uasgfp_10_EGFPpositive.lsm (cropped)	0.324	45.97	10.28
uasgfpGFPpos	uasgfp_12941	uasgfp_10_EGFPpositive.lsm (cropped)	0.416	53.56	12.43
uasgfpGFPpos	uasgfp_12942	uasgfp_10_EGFPpositive.lsm (cropped)	0.222	59.63	18.63
uasgfpGFPpos	uasgfp_12943	uasgfp_10_EGFPpositive.lsm (cropped)	2.01	82	13.66
uasgfpGFPpos	uasgfp_12944	uasgfp_10_EGFPpositive.lsm (cropped)	0.611	87.22	13.17
uasgfpGFPpos	uasgfp_12945	uasgfp_10_EGFPpositive.lsm (cropped)	0.676	62.48	9.1
uasgfpGFPpos	uasgfp_12946	uasgfp_10_EGFPpositive.lsm (cropped)	0.508	53.9	13.07
uasgfpGFPpos	uasgfp_12947	uasgfp_10_EGFPpositive.lsm (cropped)	0.935	68.61	29.77
uasgfpGFPpos	uasgfp_12948	uasgfp_10_EGFPpositive.lsm (cropped)	5.16	96.11	31.44
uasgfpGFPpos	uasgfp_12949	uasgfp_10_EGFPpositive.lsm (cropped)	0.243	47.93	39.53
uasgfpGFPpos	uasgfp_12950	uasgfp_10_EGFPpositive.lsm (cropped)	0.216	52.05	8.13
uasgfpGFPpos	uasgfp_12951	uasgfp_10_EGFPpositive.lsm (cropped)	0.238	56.77	9.95
uasgfpGFPpos	uasgfp_12952	uasgfp_10_EGFPpositive.lsm (cropped)	1.51	73.29	16.18
uasgfpGFPpos	uasgfp_12953	uasgfp_10_EGFPpositive.lsm (cropped)	0.762	92.87	9.02
uasgfpGFPpos	uasgfp_12954	uasgfp_10_EGFPpositive.lsm (cropped)	0.384	66.59	7.23
uasgfpGFPpos	uasgfp_12955	uasgfp_10_EGFPpositive.lsm (cropped)	1.55	58.31	28.1
uasgfpGFPpos	uasgfp_12956	uasgfp_10_EGFPpositive.lsm (cropped)	1.35	62.55	15.1
uasgfpGFPpos	uasgfp_12957	uasgfp_10_EGFPpositive.lsm (cropped)	0.892	62.89	49.38
uasgfpGFPpos	uasgfp_12958	uasgfp_10_EGFPpositive.lsm (cropped)	0.216	49.38	12.4
uasgfpGFPpos	uasgfp_12959	uasgfp_10_EGFPpositive.lsm (cropped)	0.524	60.49	16.73
uasgfpGFPpos	uasgfp_12960	uasgfp_10_EGFPpositive.lsm (cropped)	0.784	64.66	21.52
uasgfpGFPpos	uasgfp_12961	uasgfp_10_EGFPpositive.lsm (cropped)	0.4	58.93	20.03
uasgfpGFPpos	uasgfp_12962	uasgfp_10_EGFPpositive.lsm (cropped)	0.849	77.27	25.53
uasgfpGFPpos	uasgfp_12963	uasgfp_10_EGFPpositive.lsm (cropped)	1.15	70.4	17.51
uasgfpGFPpos	uasgfp_12964	uasgfp_10_EGFPpositive.lsm (cropped)	1.37	79.82	43.43
uasgfpGFPpos	uasgfp_12965	uasgfp_10_EGFPpositive.lsm (cropped)	2.94	89.82	36.05
uasgfpGFPpos	uasgfp_12966	uasgfp_10_EGFPpositive.lsm (cropped)	2.29	83.94	36.01
uasgfpGFPpos	uasgfp_12967	uasgfp_10_EGFPpositive.lsm (cropped)	0.384	49.86	10.32
uasgfpGFPpos	uasgfp_12968	uasgfp_10_EGFPpositive.lsm (cropped)	0.238	53.61	16.98
uasgfpGFPpos	uasgfp_12969	uasgfp_10_EGFPpositive.lsm (cropped)	2.67	87.19	19.69
uasgfpGFPpos	uasgfp_12970	uasgfp_10_EGFPpositive.lsm (cropped)	0.33	47.97	46.74
uasgfpGFPpos	uasgfp_12971	uasgfp_10_EGFPpositive.lsm (cropped)	2	72.58	21.88
uasgfpGFPpos	uasgfp_12972	uasgfp_10_EGFPpositive.lsm (cropped)	0.838	69.15	15.19
uasgfpGFPpos	uasgfp_12973	uasgfp_10_EGFPpositive.lsm (cropped)	0.557	66.2	25.14
uasgfpGFPpos	uasgfp_12974	uasgfp_10_EGFPpositive.lsm (cropped)	1	62.7	27.89
uasgfpGFPpos	uasgfp_12975	uasgfp_10_EGFPpositive.lsm (cropped)	0.833	72.28	12.37
uasgfpGFPpos	uasgfp_12976	uasgfp_10_EGFPpositive.lsm (cropped)	0.622	64.19	8.46
uasgfpGFPpos	uasgfp_12977	uasgfp_10_EGFPpositive.lsm (cropped)	2.66	78.7	19.9
uasgfpGFPpos	uasgfp_12978	uasgfp_10_EGFPpositive.lsm (cropped)	1.97	80.7	19.2
uasgfpGFPpos	uasgfp_12979	uasgfp_10_EGFPpositive.lsm (cropped)	1.76	70.67	19.82
uasgfpGFPpos	uasgfp_12980	uasgfp_10_EGFPpositive.lsm (cropped)	1.51	85.23	16.07
uasgfpGFPpos	uasgfp_12981	uasgfp_10_EGFPpositive.lsm (cropped)	0.995	78.1	22.95
uasgfpGFPpos	uasgfp_12982	uasgfp_10_EGFPpositive.lsm (cropped)	2.37	65.47	22.13
uasgfpGFPpos	uasgfp_12983	uasgfp_10_EGFPpositive.lsm (cropped)	5.6	89.8	30.56
uasgfpGFPpos	uasgfp_12984	uasgfp_10_EGFPpositive.lsm (cropped)	0.941	78.08	22.83
uasgfpGFPpos	uasgfp_12985	uasgfp_10_EGFPpositive.lsm (cropped)	0.351	68.77	36.97
uasgfpGFPpos	uasgfp_12986	uasgfp_10_EGFPpositive.lsm (cropped)	0.973	75.03	6.26
uasgfpGFPpos	uasgfp_12987	uasgfp_10_EGFPpositive.lsm (cropped)	1.44	74.38	20.5
uasgfpGFPpos	uasgfp_12988	uasgfp_10_EGFPpositive.lsm (cropped)	3.44	72.93	32
uasgfpGFPpos	uasgfp_12989	uasgfp_10_EGFPpositive.lsm (cropped)	0.314	81.34	20.45
uasgfpGFPpos	uasgfp_12990	uasgfp_10_EGFPpositive.lsm (cropped)	2.06	84.65	21.38
uasgfpGFPpos	uasgfp_12991	uasgfp_10_EGFPpositive.lsm (cropped)	0.816	66.36	54.62
uasgfpGFPpos	uasgfp_12992	uasgfp_10_EGFPpositive.lsm (cropped)	0.406	46.13	50.68
uasgfpGFPpos	uasgfp_12993	uasgfp_10_EGFPpositive.lsm (cropped)	2.85	91.7	21.71
uasgfpGFPpos	uasgfp_12994	uasgfp_10_EGFPpositive.lsm (cropped)	1.22	66.44	33.23
uasgfpGFPpos	uasgfp_12995	uasgfp_10_EGFPpositive.lsm (cropped)	1.37	60.43	36.31
uasgfpGFPpos	uasgfp_12996	uasgfp_10_EGFPpositive.lsm (cropped)	0.492	63.68	17.69
uasgfpGFPpos	uasgfp_12997	uasgfp_10_EGFPpositive.lsm (cropped)	0.384	80.77	48
uasgfpGFPpos	uasgfp_12998	uasgfp_10_EGFPpositive.lsm (cropped)	3.84	63	46.35
uasgfpGFPpos	uasgfp_12999	uasgfp_10_EGFPpositive.lsm (cropped)	0.833	60.14	33.86
uasgfpGFPpos	uasgfp_13000	uasgfp_10_EGFPpositive.lsm (cropped)	2.62	77.98	22.48
uasgfpGFPpos	uasgfp_13001	uasgfp_10_EGFPpositive.lsm (cropped)	0.508	60.07	24.48
uasgfpGFPpos	uasgfp_13002	uasgfp_10_EGFPpositive.lsm (cropped)	0.535	63.76	17.9
uasgfpGFPpos	uasgfp_13003	uasgfp_10_EGFPpositive.lsm (cropped)	0.378	48.73	9.24
uasgfpGFPpos	uasgfp_13004	uasgfp_10_EGFPpositive.lsm (cropped)	0.93	72.79	38.49
uasgfpGFPpos	uasgfp_13005	uasgfp_10_EGFPpositive.lsm (cropped)	0.406	87.17	18.19
uasgfpGFPpos	uasgfp_13006	uasgfp_10_EGFPpositive.lsm (cropped)	0.357	56.32	39.98
uasgfpGFPpos	uasgfp_13007	uasgfp_10_EGFPpositive.lsm (cropped)	0.406	55.44	20.45
uasgfpGFPpos	uasgfp_13008	uasgfp_10_EGFPpositive.lsm (cropped)	0.843	66.56	22.24
uasgfpGFPpos	uasgfp_13009	uasgfp_10_EGFPpositive.lsm (cropped)	0.341	44.35	18.89
uasgfpGFPpos	uasgfp_13010	uasgfp_10_EGFPpositive.lsm (cropped)	0.919	74.82	23.25
uasgfpGFPpos	uasgfp_13011	uasgfp_10_EGFPpositive.lsm (cropped)	1.88	74.38	20.59
uasgfpGFPpos	uasgfp_13012	uasgfp_10_EGFPpositive.lsm (cropped)	0.962	71.72	5.31
uasgfpGFPpos	uasgfp_13013	uasgfp_10_EGFPpositive.lsm (cropped)	0.249	42.83	20.35
uasgfpGFPpos	uasgfp_13014	uasgfp_10_EGFPpositive.lsm (cropped)	0.324	45.13	12.53
uasgfpGFPpos	uasgfp_13015	uasgfp_10_EGFPpositive.lsm (cropped)	0.2	51.62	4.97
uasgfpGFPpos	uasgfp_13016	uasgfp_10_EGFPpositive.lsm (cropped)	0.2	52.3	8.46
uasgfpGFPpos	uasgfp_13017	uasgfp_10_EGFPpositive.lsm (cropped)	0.881	73.41	24.48
uasgfpGFPpos	uasgfp_13018	uasgfp_10_EGFPpositive.lsm (cropped)	0.335	72.27	11.44
uasgfpGFPpos	uasgfp_13019	uasgfp_10_EGFPpositive.lsm (cropped)	2.39	82.12	14.2
uasgfpGFPpos	uasgfp_13020	uasgfp_10_EGFPpositive.lsm (cropped)	0.476	69.7	7.35
uasgfpGFPpos	uasgfp_13021	uasgfp_10_EGFPpositive.lsm (cropped)	0.703	59.31	19.18
uasgfpGFPpos	uasgfp_13022	uasgfp_10_EGFPpositive.lsm (cropped)	1.62	76.83	5.44
uasgfpGFPpos	uasgfp_13023	uasgfp_10_EGFPpositive.lsm (cropped)	0.984	95.57	9.55
uasgfpGFPpos	uasgfp_13024	uasgfp_10_EGFPpositive.lsm (cropped)	0.357	50.65	21.56
uasgfpGFPpos	uasgfp_13025	uasgfp_10_EGFPpositive.lsm (cropped)	1.02	68.92	19.75
uasgfpGFPpos	uasgfp_13026	uasgfp_10_EGFPpositive.lsm (cropped)	0.406	71.4	43.65
uasgfpGFPpos	uasgfp_13027	uasgfp_10_EGFPpositive.lsm (cropped)	0.995	69.95	30.3
uasgfpGFPpos	uasgfp_13028	uasgfp_10_EGFPpositive.lsm (cropped)	3.58	79.81	23.86
uasgfpGFPpos	uasgfp_13029	uasgfp_10_EGFPpositive.lsm (cropped)	0.411	66.36	12.83
uasgfpGFPpos	uasgfp_13030	uasgfp_10_EGFPpositive.lsm (cropped)	1.03	68.97	10.88
uasgfpGFPpos	uasgfp_13031	uasgfp_10_EGFPpositive.lsm (cropped)	2.42	71	29.02
uasgfpGFPpos	uasgfp_13032	uasgfp_10_EGFPpositive.lsm (cropped)	0.87	54.3	17.96
uasgfpGFPpos	uasgfp_13033	uasgfp_10_EGFPpositive.lsm (cropped)	0.211	50.1	14.56
uasgfpGFPpos	uasgfp_13034	uasgfp_10_EGFPpositive.lsm (cropped)	2.11	75.38	41.06
uasgfpGFPpos	uasgfp_13035	uasgfp_10_EGFPpositive.lsm (cropped)	0.2	54.41	9.54
uasgfpGFPpos	uasgfp_13036	uasgfp_10_EGFPpositive.lsm (cropped)	0.757	59.58	19.41
uasgfpGFPpos	uasgfp_13037	uasgfp_10_EGFPpositive.lsm (cropped)	0.649	49.8	19.32
uasgfpGFPpos	uasgfp_13038	uasgfp_10_EGFPpositive.lsm (cropped)	0.611	49.68	37.56
uasgfpGFPpos	uasgfp_13039	uasgfp_10_EGFPpositive.lsm (cropped)	0.265	58.69	19.59
uasgfpGFPpos	uasgfp_13040	uasgfp_10_EGFPpositive.lsm (cropped)	0.265	49.73	26.43
uasgfpGFPpos	uasgfp_13041	uasgfp_10_EGFPpositive.lsm (cropped)	0.757	63.22	17.61
uasgfpGFPpos	uasgfp_13042	uasgfp_10_EGFPpositive.lsm (cropped)	0.627	53.31	11.16
uasgfpGFPpos	uasgfp_13043	uasgfp_10_EGFPpositive.lsm (cropped)	1.41	65.75	22.88
uasgfpGFPpos	uasgfp_13044	uasgfp_10_EGFPpositive.lsm (cropped)	0.411	57.43	16.41
uasgfpGFPpos	uasgfp_13045	uasgfp_10_EGFPpositive.lsm (cropped)	3.38	70.03	16.29
uasgfpGFPpos	uasgfp_13046	uasgfp_10_EGFPpositive.lsm (cropped)	0.265	87.84	5.22
uasgfpGFPpos	uasgfp_13047	uasgfp_10_EGFPpositive.lsm (cropped)	0.806	102.34	6.89
uasgfpGFPpos	uasgfp_13048	uasgfp_10_EGFPpositive.lsm (cropped)	0.714	65.29	12.14
uasgfpGFPpos	uasgfp_13049	uasgfp_10_EGFPpositive.lsm (cropped)	0.779	65.05	13.29
uasgfpGFPpos	uasgfp_13050	uasgfp_10_EGFPpositive.lsm (cropped)	2.97	84.26	12.34
uasgfpGFPpos	uasgfp_13051	uasgfp_10_EGFPpositive.lsm (cropped)	1.89	73.22	8.16
uasgfpGFPpos	uasgfp_13052	uasgfp_10_EGFPpositive.lsm (cropped)	0.616	54.05	16.27
uasgfpGFPpos	uasgfp_13053	uasgfp_10_EGFPpositive.lsm (cropped)	0.222	63.56	5.66
uasgfpGFPpos	uasgfp_13054	uasgfp_10_EGFPpositive.lsm (cropped)	1.42	84.08	16.99
uasgfpGFPpos	uasgfp_14471	uasgfp_11_EGFPpositive.lsm (cropped)	1.28	75.14	10.26
uasgfpGFPpos	uasgfp_14472	uasgfp_11_EGFPpositive.lsm (cropped)	0.249	68.74	7.33
uasgfpGFPpos	uasgfp_14473	uasgfp_11_EGFPpositive.lsm (cropped)	0.449	56.16	18.08
uasgfpGFPpos	uasgfp_14474	uasgfp_11_EGFPpositive.lsm (cropped)	3.58	106.27	22.76
uasgfpGFPpos	uasgfp_14475	uasgfp_11_EGFPpositive.lsm (cropped)	0.389	72.28	10.88
uasgfpGFPpos	uasgfp_14476	uasgfp_11_EGFPpositive.lsm (cropped)	0.919	81.87	50.4
uasgfpGFPpos	uasgfp_14477	uasgfp_11_EGFPpositive.lsm (cropped)	0.741	86.57	6.32
uasgfpGFPpos	uasgfp_14478	uasgfp_11_EGFPpositive.lsm (cropped)	0.216	51.8	5.8
uasgfpGFPpos	uasgfp_14479	uasgfp_11_EGFPpositive.lsm (cropped)	2.09	93.57	31.78
uasgfpGFPpos	uasgfp_14480	uasgfp_11_EGFPpositive.lsm (cropped)	0.254	68.21	22.66
uasgfpGFPpos	uasgfp_14481	uasgfp_11_EGFPpositive.lsm (cropped)	0.389	68.07	6.26
uasgfpGFPpos	uasgfp_14482	uasgfp_11_EGFPpositive.lsm (cropped)	0.546	68.13	8.85
uasgfpGFPpos	uasgfp_14483	uasgfp_11_EGFPpositive.lsm (cropped)	0.308	57.58	17.16
uasgfpGFPpos	uasgfp_14484	uasgfp_11_EGFPpositive.lsm (cropped)	2.45	92.36	44.15
uasgfpGFPpos	uasgfp_14485	uasgfp_11_EGFPpositive.lsm (cropped)	0.406	75.71	24.24
uasgfpGFPpos	uasgfp_14486	uasgfp_11_EGFPpositive.lsm (cropped)	1.97	92.15	21.62
uasgfpGFPpos	uasgfp_14487	uasgfp_11_EGFPpositive.lsm (cropped)	0.789	56.72	8.54
uasgfpGFPpos	uasgfp_14488	uasgfp_11_EGFPpositive.lsm (cropped)	2.47	79.25	13.89
uasgfpGFPpos	uasgfp_14489	uasgfp_11_EGFPpositive.lsm (cropped)	3.11	76.53	26.63
uasgfpGFPpos	uasgfp_14490	uasgfp_11_EGFPpositive.lsm (cropped)	6.8	88.62	28.59
uasgfpGFPpos	uasgfp_14491	uasgfp_11_EGFPpositive.lsm (cropped)	1.81	86.35	19.08
uasgfpGFPpos	uasgfp_14492	uasgfp_11_EGFPpositive.lsm (cropped)	0.535	70.31	7.58
uasgfpGFPpos	uasgfp_14493	uasgfp_11_EGFPpositive.lsm (cropped)	0.341	61.87	17.86
uasgfpGFPpos	uasgfp_14494	uasgfp_11_EGFPpositive.lsm (cropped)	0.676	96.95	8.33
uasgfpGFPpos	uasgfp_14495	uasgfp_11_EGFPpositive.lsm (cropped)	0.314	72.57	9.78
uasgfpGFPpos	uasgfp_14496	uasgfp_11_EGFPpositive.lsm (cropped)	0.243	68.87	10.84
uasgfpGFPpos	uasgfp_14497	uasgfp_11_EGFPpositive.lsm (cropped)	0.33	71.05	8.84
uasgfpGFPpos	uasgfp_14498	uasgfp_11_EGFPpositive.lsm (cropped)	1.1	64.72	40.36
uasgfpGFPpos	uasgfp_14499	uasgfp_11_EGFPpositive.lsm (cropped)	1.02	88.15	27.06
uasgfpGFPpos	uasgfp_14500	uasgfp_11_EGFPpositive.lsm (cropped)	0.93	91.27	7
uasgfpGFPpos	uasgfp_14501	uasgfp_11_EGFPpositive.lsm (cropped)	0.827	95.4	24.8
uasgfpGFPpos	uasgfp_14502	uasgfp_11_EGFPpositive.lsm (cropped)	0.487	77.13	40.54
uasgfpGFPpos	uasgfp_14503	uasgfp_11_EGFPpositive.lsm (cropped)	0.2	57.16	14.46
uasgfpGFPpos	uasgfp_14504	uasgfp_11_EGFPpositive.lsm (cropped)	0.514	87.16	7.75
uasgfpGFPpos	uasgfp_14505	uasgfp_11_EGFPpositive.lsm (cropped)	0.622	60.56	15.43
uasgfpGFPpos	uasgfp_14506	uasgfp_11_EGFPpositive.lsm (cropped)	0.416	57.26	8.66
uasgfpGFPpos	uasgfp_14507	uasgfp_11_EGFPpositive.lsm (cropped)	0.53	69.02	17.54
uasgfpGFPpos	uasgfp_14508	uasgfp_11_EGFPpositive.lsm (cropped)	0.633	56.91	43.09
uasgfpGFPpos	uasgfp_14509	uasgfp_11_EGFPpositive.lsm (cropped)	0.249	79.52	108.09
uasgfpGFPpos	uasgfp_14510	uasgfp_11_EGFPpositive.lsm (cropped)	2.05	83.36	29.08
uasgfpGFPpos	uasgfp_14511	uasgfp_11_EGFPpositive.lsm (cropped)	0.227	58.64	6.74
uasgfpGFPpos	uasgfp_14512	uasgfp_11_EGFPpositive.lsm (cropped)	1.06	61.47	18.87
uasgfpGFPpos	uasgfp_14513	uasgfp_11_EGFPpositive.lsm (cropped)	11.13	108.69	25.72
uasgfpGFPpos	uasgfp_14514	uasgfp_11_EGFPpositive.lsm (cropped)	0.8	68.64	17.03
uasgfpGFPpos	uasgfp_14515	uasgfp_11_EGFPpositive.lsm (cropped)	2.35	80.95	43.77
uasgfpGFPpos	uasgfp_14516	uasgfp_11_EGFPpositive.lsm (cropped)	1.64	76.55	17.83
uasgfpGFPpos	uasgfp_14517	uasgfp_11_EGFPpositive.lsm (cropped)	0.714	90.5	25.42
uasgfpGFPpos	uasgfp_14518	uasgfp_11_EGFPpositive.lsm (cropped)	2.03	87.64	14.84
uasgfpGFPpos	uasgfp_14519	uasgfp_11_EGFPpositive.lsm (cropped)	0.384	53.06	5.96
uasgfpGFPpos	uasgfp_14520	uasgfp_11_EGFPpositive.lsm (cropped)	0.816	57.03	14.42
uasgfpGFPpos	uasgfp_14521	uasgfp_11_EGFPpositive.lsm (cropped)	0.211	49.62	21.56
uasgfpGFPpos	uasgfp_14522	uasgfp_11_EGFPpositive.lsm (cropped)	2.08	68.62	46.6
uasgfpGFPpos	uasgfp_14523	uasgfp_11_EGFPpositive.lsm (cropped)	0.395	50.19	15.32
uasgfpGFPpos	uasgfp_14524	uasgfp_11_EGFPpositive.lsm (cropped)	1.51	111.25	13.23
uasgfpGFPpos	uasgfp_14525	uasgfp_11_EGFPpositive.lsm (cropped)	0.335	54.48	23.42
uasgfpGFPpos	uasgfp_14526	uasgfp_11_EGFPpositive.lsm (cropped)	0.2	67.51	5.62
uasgfpGFPpos	uasgfp_14527	uasgfp_11_EGFPpositive.lsm (cropped)	0.757	94.08	7.15
uasgfpGFPpos	uasgfp_14528	uasgfp_11_EGFPpositive.lsm (cropped)	0.622	69.45	21.09
uasgfpGFPpos	uasgfp_14529	uasgfp_11_EGFPpositive.lsm (cropped)	0.746	52.49	12.9
uasgfpGFPpos	uasgfp_14530	uasgfp_11_EGFPpositive.lsm (cropped)	2.95	99.36	50.04
uasgfpGFPpos	uasgfp_14531	uasgfp_11_EGFPpositive.lsm (cropped)	2.9	75.06	21.09
uasgfpGFPpos	uasgfp_14532	uasgfp_11_EGFPpositive.lsm (cropped)	0.308	46.19	8.11
uasgfpGFPpos	uasgfp_14533	uasgfp_11_EGFPpositive.lsm (cropped)	3.85	101.8	8.76
uasgfpGFPpos	uasgfp_14534	uasgfp_11_EGFPpositive.lsm (cropped)	0.232	59.53	11.67
uasgfpGFPpos	uasgfp_14535	uasgfp_11_EGFPpositive.lsm (cropped)	0.378	72.21	8.6
uasgfpGFPpos	uasgfp_14536	uasgfp_11_EGFPpositive.lsm (cropped)	0.238	67.93	5.52
uasgfpGFPpos	uasgfp_14537	uasgfp_11_EGFPpositive.lsm (cropped)	0.205	42	12.32
uasgfpGFPpos	uasgfp_14538	uasgfp_11_EGFPpositive.lsm (cropped)	2.31	86.18	19.97
uasgfpGFPpos	uasgfp_14539	uasgfp_11_EGFPpositive.lsm (cropped)	1.58	65.21	6.51
uasgfpGFPpos	uasgfp_14540	uasgfp_11_EGFPpositive.lsm (cropped)	0.216	55.33	10.9
uasgfpGFPpos	uasgfp_14541	uasgfp_11_EGFPpositive.lsm (cropped)	8.85	106.88	10.68
uasgfpGFPpos	uasgfp_14542	uasgfp_11_EGFPpositive.lsm (cropped)	0.216	54.17	8.05
uasgfpGFPpos	uasgfp_14543	uasgfp_11_EGFPpositive.lsm (cropped)	0.53	63.46	9.98
uasgfpGFPpos	uasgfp_14544	uasgfp_11_EGFPpositive.lsm (cropped)	1.64	75.88	15.56
uasgfpGFPpos	uasgfp_14545	uasgfp_11_EGFPpositive.lsm (cropped)	0.454	56.08	17.64
uasgfpGFPpos	uasgfp_14546	uasgfp_11_EGFPpositive.lsm (cropped)	0.649	52.73	18.72
uasgfpGFPpos	uasgfp_15946	uasgfp_12_EGFPpositive.lsm (cropped)	4.47	109.42	11.29
uasgfpGFPpos	uasgfp_15947	uasgfp_12_EGFPpositive.lsm (cropped)	0.497	68.73	11.02
uasgfpGFPpos	uasgfp_15948	uasgfp_12_EGFPpositive.lsm (cropped)	0.433	68.9	12.86
uasgfpGFPpos	uasgfp_15949	uasgfp_12_EGFPpositive.lsm (cropped)	0.205	62.82	9.84
uasgfpGFPpos	uasgfp_15950	uasgfp_12_EGFPpositive.lsm (cropped)	1.26	91.34	29.98
uasgfpGFPpos	uasgfp_15951	uasgfp_12_EGFPpositive.lsm (cropped)	0.292	58.15	20.35
uasgfpGFPpos	uasgfp_15952	uasgfp_12_EGFPpositive.lsm (cropped)	1.78	82.66	79.5
uasgfpGFPpos	uasgfp_15953	uasgfp_12_EGFPpositive.lsm (cropped)	0.746	84.27	27.63
uasgfpGFPpos	uasgfp_15954	uasgfp_12_EGFPpositive.lsm (cropped)	1.11	76.21	30.98
uasgfpGFPpos	uasgfp_15955	uasgfp_12_EGFPpositive.lsm (cropped)	0.368	71.87	25.84
uasgfpGFPpos	uasgfp_15956	uasgfp_12_EGFPpositive.lsm (cropped)	0.622	64.5	50.47
uasgfpGFPpos	uasgfp_15957	uasgfp_12_EGFPpositive.lsm (cropped)	0.26	79.98	10.31
uasgfpGFPpos	uasgfp_15958	uasgfp_12_EGFPpositive.lsm (cropped)	1.85	101.79	29.66
uasgfpGFPpos	uasgfp_15959	uasgfp_12_EGFPpositive.lsm (cropped)	3.59	99.42	30.52
uasgfpGFPpos	uasgfp_15960	uasgfp_12_EGFPpositive.lsm (cropped)	0.324	86.22	12.67
uasgfpGFPpos	uasgfp_15961	uasgfp_12_EGFPpositive.lsm (cropped)	0.368	63.54	13.94
uasgfpGFPpos	uasgfp_15962	uasgfp_12_EGFPpositive.lsm (cropped)	3.32	104.94	17.26
uasgfpGFPpos	uasgfp_15963	uasgfp_12_EGFPpositive.lsm (cropped)	0.692	88.51	15.97
uasgfpGFPpos	uasgfp_15964	uasgfp_12_EGFPpositive.lsm (cropped)	0.297	62.2	13.29
uasgfpGFPpos	uasgfp_15965	uasgfp_12_EGFPpositive.lsm (cropped)	0.211	85.59	43.72
uasgfpGFPpos	uasgfp_15966	uasgfp_12_EGFPpositive.lsm (cropped)	0.243	101.89	8.62
uasgfpGFPpos	uasgfp_15967	uasgfp_12_EGFPpositive.lsm (cropped)	1.13	87.56	16.19
uasgfpGFPpos	uasgfp_15968	uasgfp_12_EGFPpositive.lsm (cropped)	0.211	76.82	10.9
uasgfpGFPpos	uasgfp_15969	uasgfp_12_EGFPpositive.lsm (cropped)	0.681	70.12	22.81
uasgfpGFPpos	uasgfp_15970	uasgfp_12_EGFPpositive.lsm (cropped)	1.12	66.06	12.19
uasgfpGFPpos	uasgfp_15971	uasgfp_12_EGFPpositive.lsm (cropped)	0.973	63.85	23.13
uasgfpGFPpos	uasgfp_15972	uasgfp_12_EGFPpositive.lsm (cropped)	1.08	130.61	17.67
uasgfpGFPpos	uasgfp_15973	uasgfp_12_EGFPpositive.lsm (cropped)	0.681	144.94	23.64
uasgfpGFPpos	uasgfp_15974	uasgfp_12_EGFPpositive.lsm (cropped)	0.319	59.64	24.86
uasgfpGFPpos	uasgfp_15975	uasgfp_12_EGFPpositive.lsm (cropped)	2	89.99	25.28
uasgfpGFPpos	uasgfp_15976	uasgfp_12_EGFPpositive.lsm (cropped)	0.227	83.81	16.29
uasgfpGFPpos	uasgfp_15977	uasgfp_12_EGFPpositive.lsm (cropped)	1.11	70.98	35.55
uasgfpGFPpos	uasgfp_15978	uasgfp_12_EGFPpositive.lsm (cropped)	2.26	92.19	18.57
uasgfpGFPpos	uasgfp_15979	uasgfp_12_EGFPpositive.lsm (cropped)	0.26	65.02	25.1
uasgfpGFPpos	uasgfp_15980	uasgfp_12_EGFPpositive.lsm (cropped)	1.16	81.93	29.91
uasgfpGFPpos	uasgfp_15981	uasgfp_12_EGFPpositive.lsm (cropped)	2.83	119.35	12.77
uasgfpGFPpos	uasgfp_15982	uasgfp_12_EGFPpositive.lsm (cropped)	0.346	98.73	8.64
uasgfpGFPpos	uasgfp_15983	uasgfp_12_EGFPpositive.lsm (cropped)	1.56	94.65	45.78
uasgfpGFPpos	uasgfp_15984	uasgfp_12_EGFPpositive.lsm (cropped)	0.838	76.1	27.42
uasgfpGFPpos	uasgfp_15985	uasgfp_12_EGFPpositive.lsm (cropped)	0.362	60.96	29.66
uasgfpGFPpos	uasgfp_15986	uasgfp_12_EGFPpositive.lsm (cropped)	0.822	89.78	38.68
uasgfpGFPpos	uasgfp_15987	uasgfp_12_EGFPpositive.lsm (cropped)	1.23	74.58	28.64
uasgfpGFPpos	uasgfp_15988	uasgfp_12_EGFPpositive.lsm (cropped)	0.254	67.3	20.32
uasgfpGFPpos	uasgfp_15989	uasgfp_12_EGFPpositive.lsm (cropped)	1.06	93.84	30.81
uasgfpGFPpos	uasgfp_15990	uasgfp_12_EGFPpositive.lsm (cropped)	0.205	64.92	23.05
uasgfpGFPpos	uasgfp_15991	uasgfp_12_EGFPpositive.lsm (cropped)	0.66	71.45	21.99
uasgfpGFPpos	uasgfp_15992	uasgfp_12_EGFPpositive.lsm (cropped)	0.308	71.6	28.3
uasgfpGFPpos	uasgfp_15993	uasgfp_12_EGFPpositive.lsm (cropped)	1.66	73.87	77.5
uasgfpGFPpos	uasgfp_15994	uasgfp_12_EGFPpositive.lsm (cropped)	5.37	73.16	27.19
uasgfpGFPpos	uasgfp_15995	uasgfp_12_EGFPpositive.lsm (cropped)	1.47	84.73	34.25
uasgfpGFPpos	uasgfp_15996	uasgfp_12_EGFPpositive.lsm (cropped)	1.43	77.94	33.08
uasgfpGFPpos	uasgfp_15997	uasgfp_12_EGFPpositive.lsm (cropped)	5.52	82.57	33.33
uasgfpGFPpos	uasgfp_15998	uasgfp_12_EGFPpositive.lsm (cropped)	0.703	71.29	50.99
uasgfpGFPpos	uasgfp_15999	uasgfp_12_EGFPpositive.lsm (cropped)	1.27	84.5	18.92
uasgfpGFPpos	uasgfp_16000	uasgfp_12_EGFPpositive.lsm (cropped)	0.314	53.5	22.74
uasgfpGFPpos	uasgfp_16001	uasgfp_12_EGFPpositive.lsm (cropped)	0.276	73.08	21.71
uasgfpGFPpos	uasgfp_16002	uasgfp_12_EGFPpositive.lsm (cropped)	0.222	122.85	8.61
uasgfpGFPpos	uasgfp_16003	uasgfp_12_EGFPpositive.lsm (cropped)	0.633	94.68	21.15
uasgfpGFPpos	uasgfp_16004	uasgfp_12_EGFPpositive.lsm (cropped)	0.584	66.03	26.81
uasgfpGFPpos	uasgfp_16005	uasgfp_12_EGFPpositive.lsm (cropped)	2.48	64.49	24.62
uasgfpGFPpos	uasgfp_16006	uasgfp_12_EGFPpositive.lsm (cropped)	1.3	79.83	53.23
uasgfpGFPpos	uasgfp_16007	uasgfp_12_EGFPpositive.lsm (cropped)	5.67	93.27	39.35
uasgfpGFPpos	uasgfp_16008	uasgfp_12_EGFPpositive.lsm (cropped)	0.2	61.92	15.05
uasgfpGFPpos	uasgfp_16009	uasgfp_12_EGFPpositive.lsm (cropped)	0.341	60.17	19.49
uasgfpGFPpos	uasgfp_16010	uasgfp_12_EGFPpositive.lsm (cropped)	4.26	93.9	25.04
uasgfpGFPpos	uasgfp_16011	uasgfp_12_EGFPpositive.lsm (cropped)	0.297	91.07	30.58
uasgfpGFPpos	uasgfp_16012	uasgfp_12_EGFPpositive.lsm (cropped)	0.562	66.98	16.13
uasgfpGFPpos	uasgfp_16013	uasgfp_12_EGFPpositive.lsm (cropped)	1.9	116.26	12.56
uasgfpGFPpos	uasgfp_16014	uasgfp_12_EGFPpositive.lsm (cropped)	0.843	79.15	15.66
uasgfpGFPpos	uasgfp_16015	uasgfp_12_EGFPpositive.lsm (cropped)	0.27	52.86	30.06
uasgfpGFPpos	uasgfp_16016	uasgfp_12_EGFPpositive.lsm (cropped)	0.752	69.46	14.88
uasgfpGFPpos	uasgfp_16017	uasgfp_12_EGFPpositive.lsm (cropped)	0.227	97.88	27.12
uasgfpGFPpos	uasgfp_16018	uasgfp_12_EGFPpositive.lsm (cropped)	0.919	64.22	21.86
uasgfpGFPpos	uasgfp_16019	uasgfp_12_EGFPpositive.lsm (cropped)	6.32	96.5	35.38
uasgfpGFPpos	uasgfp_16020	uasgfp_12_EGFPpositive.lsm (cropped)	0.389	59.51	16.74
uasgfpGFPpos	uasgfp_16021	uasgfp_12_EGFPpositive.lsm (cropped)	0.216	67.63	103.08
uasgfpGFPpos	uasgfp_16022	uasgfp_12_EGFPpositive.lsm (cropped)	1.15	60.05	37.24
uasgfpGFPpos	uasgfp_16023	uasgfp_12_EGFPpositive.lsm (cropped)	11.7	103.91	31.64
uasgfpGFPpos	uasgfp_16024	uasgfp_12_EGFPpositive.lsm (cropped)	0.822	63.88	27.84
uasgfpGFPpos	uasgfp_16025	uasgfp_12_EGFPpositive.lsm (cropped)	0.795	58.9	32.62
uasgfpGFPpos	uasgfp_16026	uasgfp_12_EGFPpositive.lsm (cropped)	1.28	76.95	17.59
uasgfpGFPpos	uasgfp_16027	uasgfp_12_EGFPpositive.lsm (cropped)	0.232	58.67	14.23
uasgfpGFPpos	uasgfp_16028	uasgfp_12_EGFPpositive.lsm (cropped)	0.606	64.78	14.96
uasgfpGFPpos	uasgfp_16029	uasgfp_12_EGFPpositive.lsm (cropped)	0.254	95.47	20.34
uasgfpGFPpos	uasgfp_16030	uasgfp_12_EGFPpositive.lsm (cropped)	3.93	98.15	36.55
uasgfpGFPpos	uasgfp_16031	uasgfp_12_EGFPpositive.lsm (cropped)	0.768	87.53	21.78
uasgfpGFPpos	uasgfp_16032	uasgfp_12_EGFPpositive.lsm (cropped)	0.254	68.34	13.13
uasgfpGFPpos	uasgfp_16033	uasgfp_12_EGFPpositive.lsm (cropped)	1.09	70.53	26.25
uasgfpGFPpos	uasgfp_16034	uasgfp_12_EGFPpositive.lsm (cropped)	1.46	77.47	29.03
uasgfpGFPpos	uasgfp_16035	uasgfp_12_EGFPpositive.lsm (cropped)	5.44	83.93	32.06
uasgfpGFPpos	uasgfp_16036	uasgfp_12_EGFPpositive.lsm (cropped)	2.94	87.16	24.17
uasgfpGFPpos	uasgfp_16037	uasgfp_12_EGFPpositive.lsm (cropped)	4.68	110.12	28.03
uasgfpGFPpos	uasgfp_16038	uasgfp_12_EGFPpositive.lsm (cropped)	0.676	80.21	46.25
uasgfpGFPpos	uasgfp_16039	uasgfp_12_EGFPpositive.lsm (cropped)	0.26	88.69	22.31
uasgfpGFPpos	uasgfp_16040	uasgfp_12_EGFPpositive.lsm (cropped)	0.205	56.26	17.71
uasgfpGFPpos	uasgfp_16041	uasgfp_12_EGFPpositive.lsm (cropped)	0.216	76.8	20.2
uasgfpGFPpos	uasgfp_16042	uasgfp_12_EGFPpositive.lsm (cropped)	0.476	59.75	81.72
uasgfpGFPpos	uasgfp_16043	uasgfp_12_EGFPpositive.lsm (cropped)	2.69	81.96	16.25
uasgfpGFPpos	uasgfp_16044	uasgfp_12_EGFPpositive.lsm (cropped)	0.292	81.81	17.76
uasgfpGFPpos	uasgfp_16045	uasgfp_12_EGFPpositive.lsm (cropped)	1.97	82.37	24.22
uasgfpGFPpos	uasgfp_16046	uasgfp_12_EGFPpositive.lsm (cropped)	2.71	88.66	27.97
uasgfpGFPpos	uasgfp_16047	uasgfp_12_EGFPpositive.lsm (cropped)	1.06	77.8	26.12
uasgfpGFPpos	uasgfp_16048	uasgfp_12_EGFPpositive.lsm (cropped)	5.42	85.4	24.32
uasgfpGFPpos	uasgfp_16049	uasgfp_12_EGFPpositive.lsm (cropped)	0.222	85.29	4.73
uasgfpGFPpos	uasgfp_16050	uasgfp_12_EGFPpositive.lsm (cropped)	0.622	91.36	12.44
uasgfpGFPpos	uasgfp_16051	uasgfp_12_EGFPpositive.lsm (cropped)	0.692	72.3	12.29
uasgfpGFPpos	uasgfp_16052	uasgfp_12_EGFPpositive.lsm (cropped)	0.606	69.66	15.69
uasgfpGFPpos	uasgfp_16053	uasgfp_12_EGFPpositive.lsm (cropped)	0.968	86.84	19.36
uasgfpGFPpos	uasgfp_16054	uasgfp_12_EGFPpositive.lsm (cropped)	3.41	73.95	18.76
uasgfpGFPpos	uasgfp_16055	uasgfp_12_EGFPpositive.lsm (cropped)	0.584	65.01	9.11
uasgfpGFPpos	uasgfp_16056	uasgfp_12_EGFPpositive.lsm (cropped)	0.232	59.12	12.44
uasgfpGFPpos	uasgfp_16057	uasgfp_12_EGFPpositive.lsm (cropped)	0.254	65.43	18.38
uasgfpGFPpos	uasgfp_16058	uasgfp_12_EGFPpositive.lsm (cropped)	1.78	87.33	13.29
uasgfpGFPpos	uasgfp_16059	uasgfp_12_EGFPpositive.lsm (cropped)	3	75.56	9.19
uasgfpGFPpos	uasgfp_16060	uasgfp_12_EGFPpositive.lsm (cropped)	0.243	92.93	6.13
uasgfpGFPpos	uasgfp_17446	uasgfp_13_EGFPpositive.lsm (cropped)	0.892	72.65	6.32
uasgfpGFPpos	uasgfp_17447	uasgfp_13_EGFPpositive.lsm (cropped)	0.503	37.24	21.83
uasgfpGFPpos	uasgfp_17448	uasgfp_13_EGFPpositive.lsm (cropped)	0.779	39.97	16.72
uasgfpGFPpos	uasgfp_17449	uasgfp_13_EGFPpositive.lsm (cropped)	0.854	41.97	21
uasgfpGFPpos	uasgfp_17450	uasgfp_13_EGFPpositive.lsm (cropped)	1.24	41.07	28.87
uasgfpGFPpos	uasgfp_17451	uasgfp_13_EGFPpositive.lsm (cropped)	0.346	34.94	17.63
uasgfpGFPpos	uasgfp_17452	uasgfp_13_EGFPpositive.lsm (cropped)	0.216	32.4	22.93
uasgfpGFPpos	uasgfp_17453	uasgfp_13_EGFPpositive.lsm (cropped)	0.26	34.56	23.02
uasgfpGFPpos	uasgfp_17454	uasgfp_13_EGFPpositive.lsm (cropped)	0.232	48.4	6.93
uasgfpGFPpos	uasgfp_17455	uasgfp_13_EGFPpositive.lsm (cropped)	1.52	65.75	27.45
uasgfpGFPpos	uasgfp_17456	uasgfp_13_EGFPpositive.lsm (cropped)	0.351	32.77	67.25
uasgfpGFPpos	uasgfp_17457	uasgfp_13_EGFPpositive.lsm (cropped)	0.449	42.27	48.46
uasgfpGFPpos	uasgfp_17458	uasgfp_13_EGFPpositive.lsm (cropped)	0.373	35.17	21.09
uasgfpGFPpos	uasgfp_17459	uasgfp_13_EGFPpositive.lsm (cropped)	0.254	37.32	44.26
uasgfpGFPpos	uasgfp_17460	uasgfp_13_EGFPpositive.lsm (cropped)	0.222	33.61	15.83
uasgfpGFPpos	uasgfp_17461	uasgfp_13_EGFPpositive.lsm (cropped)	0.335	39.03	54.63
uasgfpGFPpos	uasgfp_17462	uasgfp_13_EGFPpositive.lsm (cropped)	0.86	36.47	27.98
uasgfpGFPpos	uasgfp_17463	uasgfp_13_EGFPpositive.lsm (cropped)	2.96	55.56	63.87
uasgfpGFPpos	uasgfp_17464	uasgfp_13_EGFPpositive.lsm (cropped)	0.703	64.34	8.94
uasgfpGFPpos	uasgfp_17465	uasgfp_13_EGFPpositive.lsm (cropped)	1.87	78.22	13.66
uasgfpGFPpos	uasgfp_17466	uasgfp_13_EGFPpositive.lsm (cropped)	0.503	35.9	15.1
uasgfpGFPpos	uasgfp_17467	uasgfp_13_EGFPpositive.lsm (cropped)	1.16	44.23	29.26
uasgfpGFPpos	uasgfp_17468	uasgfp_13_EGFPpositive.lsm (cropped)	0.26	43.69	6.58
uasgfpGFPpos	uasgfp_17469	uasgfp_13_EGFPpositive.lsm (cropped)	0.232	37.98	47.26
uasgfpGFPpos	uasgfp_17470	uasgfp_13_EGFPpositive.lsm (cropped)	2.61	77.16	59.98
uasgfpGFPpos	uasgfp_17471	uasgfp_13_EGFPpositive.lsm (cropped)	0.27	31.62	33.16
uasgfpGFPpos	uasgfp_17472	uasgfp_13_EGFPpositive.lsm (cropped)	0.492	36.35	7.85
uasgfpGFPpos	uasgfp_17473	uasgfp_13_EGFPpositive.lsm (cropped)	0.822	41.08	27.69
uasgfpGFPpos	uasgfp_17474	uasgfp_13_EGFPpositive.lsm (cropped)	1.82	46.15	33.76
uasgfpGFPpos	uasgfp_17475	uasgfp_13_EGFPpositive.lsm (cropped)	0.254	48.19	37.51
uasgfpGFPpos	uasgfp_17476	uasgfp_13_EGFPpositive.lsm (cropped)	0.238	33.16	121.32
uasgfpGFPpos	uasgfp_17477	uasgfp_13_EGFPpositive.lsm (cropped)	0.438	34.52	19.62
uasgfpGFPpos	uasgfp_17478	uasgfp_13_EGFPpositive.lsm (cropped)	0.2	36.59	36.68
uasgfpGFPpos	uasgfp_17479	uasgfp_13_EGFPpositive.lsm (cropped)	1.23	71.03	36.32
uasgfpGFPpos	uasgfp_17480	uasgfp_13_EGFPpositive.lsm (cropped)	0.622	36.7	23.27
uasgfpGFPpos	uasgfp_17481	uasgfp_13_EGFPpositive.lsm (cropped)	0.378	38.64	6.39
uasgfpGFPpos	uasgfp_17482	uasgfp_13_EGFPpositive.lsm (cropped)	0.422	34.69	9.78
uasgfpGFPpos	uasgfp_17483	uasgfp_13_EGFPpositive.lsm (cropped)	0.643	37.31	6.71
uasgfpGFPpos	uasgfp_17484	uasgfp_13_EGFPpositive.lsm (cropped)	0.292	51.37	19.89
uasgfpGFPpos	uasgfp_17485	uasgfp_13_EGFPpositive.lsm (cropped)	2.09	40.67	21.09
uasgfpGFPpos	uasgfp_17486	uasgfp_13_EGFPpositive.lsm (cropped)	1.25	41.68	17.3
uasgfpGFPpos	uasgfp_17487	uasgfp_13_EGFPpositive.lsm (cropped)	1.07	38.64	20.86
uasgfpGFPpos	uasgfp_17488	uasgfp_13_EGFPpositive.lsm (cropped)	0.205	40.24	20.24
uasgfpGFPpos	uasgfp_17489	uasgfp_13_EGFPpositive.lsm (cropped)	0.292	45.69	7.41
uasgfpGFPpos	uasgfp_17490	uasgfp_13_EGFPpositive.lsm (cropped)	0.216	44.17	56.95
uasgfpGFPpos	uasgfp_17491	uasgfp_13_EGFPpositive.lsm (cropped)	2.13	46.76	27.17
uasgfpGFPpos	uasgfp_17492	uasgfp_13_EGFPpositive.lsm (cropped)	0.914	33.67	21.08
uasgfpGFPpos	uasgfp_17493	uasgfp_13_EGFPpositive.lsm (cropped)	0.314	33.5	33.22
uasgfpGFPpos	uasgfp_17494	uasgfp_13_EGFPpositive.lsm (cropped)	1.71	46.71	19
uasgfpGFPpos	uasgfp_17495	uasgfp_13_EGFPpositive.lsm (cropped)	0.611	32.65	17.55
uasgfpGFPpos	uasgfp_17496	uasgfp_13_EGFPpositive.lsm (cropped)	0.47	56.89	6.14
uasgfpGFPpos	uasgfp_17497	uasgfp_13_EGFPpositive.lsm (cropped)	0.541	36.05	21.64
uasgfpGFPpos	uasgfp_17498	uasgfp_13_EGFPpositive.lsm (cropped)	0.519	94.76	18.77
uasgfpGFPpos	uasgfp_17499	uasgfp_13_EGFPpositive.lsm (cropped)	5.13	46.6	67.79
uasgfpGFPpos	uasgfp_17500	uasgfp_13_EGFPpositive.lsm (cropped)	1.13	64	19.63
uasgfpGFPpos	uasgfp_17501	uasgfp_13_EGFPpositive.lsm (cropped)	2.89	47.63	44.33
uasgfpGFPpos	uasgfp_17502	uasgfp_13_EGFPpositive.lsm (cropped)	2.88	42.67	24.46
uasgfpGFPpos	uasgfp_17503	uasgfp_13_EGFPpositive.lsm (cropped)	0.27	34.56	15.34
uasgfpGFPpos	uasgfp_17504	uasgfp_13_EGFPpositive.lsm (cropped)	0.968	45.02	57.2
uasgfpGFPpos	uasgfp_17505	uasgfp_13_EGFPpositive.lsm (cropped)	0.351	36.46	14.32
uasgfpGFPpos	uasgfp_17506	uasgfp_13_EGFPpositive.lsm (cropped)	0.227	35.12	14.26
uasgfpGFPpos	uasgfp_17507	uasgfp_13_EGFPpositive.lsm (cropped)	0.2	33.51	21.49
uasgfpGFPpos	uasgfp_17508	uasgfp_13_EGFPpositive.lsm (cropped)	0.211	61	4.9
uasgfpGFPpos	uasgfp_17509	uasgfp_13_EGFPpositive.lsm (cropped)	1.82	36.14	34.35
uasgfpGFPpos	uasgfp_17510	uasgfp_13_EGFPpositive.lsm (cropped)	2.14	37.46	40.71
uasgfpGFPpos	uasgfp_17511	uasgfp_13_EGFPpositive.lsm (cropped)	0.465	43.07	27.88
uasgfpGFPpos	uasgfp_17512	uasgfp_13_EGFPpositive.lsm (cropped)	0.47	34.17	40.71
uasgfpGFPpos	uasgfp_17513	uasgfp_13_EGFPpositive.lsm (cropped)	0.746	36.84	24.36
uasgfpGFPpos	uasgfp_17514	uasgfp_13_EGFPpositive.lsm (cropped)	0.335	35.71	13.34
uasgfpGFPpos	uasgfp_17515	uasgfp_13_EGFPpositive.lsm (cropped)	0.546	59.11	5.85
uasgfpGFPpos	uasgfp_17516	uasgfp_13_EGFPpositive.lsm (cropped)	0.26	33.21	6.48
uasgfpGFPpos	uasgfp_17517	uasgfp_13_EGFPpositive.lsm (cropped)	0.93	38.53	15.99
uasgfpGFPpos	uasgfp_17518	uasgfp_13_EGFPpositive.lsm (cropped)	7.22	56.19	29.44
uasgfpGFPpos	uasgfp_17519	uasgfp_13_EGFPpositive.lsm (cropped)	0.314	32.14	9
uasgfpGFPpos	uasgfp_17520	uasgfp_13_EGFPpositive.lsm (cropped)	1.6	41.56	26.92
uasgfpGFPpos	uasgfp_18445	uasgfp_14_EGFPpositive.lsm (cropped)	0.546	78.63	14.27
uasgfpGFPpos	uasgfp_18446	uasgfp_14_EGFPpositive.lsm (cropped)	1.17	80.28	19.81
uasgfpGFPpos	uasgfp_18447	uasgfp_14_EGFPpositive.lsm (cropped)	0.27	74.52	14.14
uasgfpGFPpos	uasgfp_18448	uasgfp_14_EGFPpositive.lsm (cropped)	4.04	90.44	30.09
uasgfpGFPpos	uasgfp_18449	uasgfp_14_EGFPpositive.lsm (cropped)	1.94	82.57	38.6
uasgfpGFPpos	uasgfp_18450	uasgfp_14_EGFPpositive.lsm (cropped)	0.638	59.67	19.58
uasgfpGFPpos	uasgfp_18451	uasgfp_14_EGFPpositive.lsm (cropped)	0.281	50.35	17.85
uasgfpGFPpos	uasgfp_18452	uasgfp_14_EGFPpositive.lsm (cropped)	4.04	99.93	13.32
uasgfpGFPpos	uasgfp_18453	uasgfp_14_EGFPpositive.lsm (cropped)	0.789	91.97	31.27
uasgfpGFPpos	uasgfp_18454	uasgfp_14_EGFPpositive.lsm (cropped)	0.914	74.83	9.57
uasgfpGFPpos	uasgfp_18455	uasgfp_14_EGFPpositive.lsm (cropped)	0.276	53.73	14
uasgfpGFPpos	uasgfp_18456	uasgfp_14_EGFPpositive.lsm (cropped)	7.26	108.35	36.4
uasgfpGFPpos	uasgfp_18457	uasgfp_14_EGFPpositive.lsm (cropped)	0.411	61.55	16.3
uasgfpGFPpos	uasgfp_18458	uasgfp_14_EGFPpositive.lsm (cropped)	1.22	91.24	7.6
uasgfpGFPpos	uasgfp_18459	uasgfp_14_EGFPpositive.lsm (cropped)	4.36	96.24	7.27
uasgfpGFPpos	uasgfp_18460	uasgfp_14_EGFPpositive.lsm (cropped)	3.3	87.28	12.24
uasgfpGFPpos	uasgfp_18461	uasgfp_14_EGFPpositive.lsm (cropped)	0.638	53.42	12.07
uasgfpGFPpos	uasgfp_18462	uasgfp_14_EGFPpositive.lsm (cropped)	0.508	53.49	10.85
uasgfpGFPpos	uasgfp_18463	uasgfp_14_EGFPpositive.lsm (cropped)	0.952	53.5	17.2
uasgfpGFPpos	uasgfp_18464	uasgfp_14_EGFPpositive.lsm (cropped)	0.584	58.31	22.05
uasgfpGFPpos	uasgfp_18465	uasgfp_14_EGFPpositive.lsm (cropped)	0.714	56.15	14.61
uasgfpGFPpos	uasgfp_18466	uasgfp_14_EGFPpositive.lsm (cropped)	0.27	51.2	24.6
uasgfpGFPpos	uasgfp_18467	uasgfp_14_EGFPpositive.lsm (cropped)	0.465	59.38	8.5
uasgfpGFPpos	uasgfp_18468	uasgfp_14_EGFPpositive.lsm (cropped)	0.373	52.39	14.84
uasgfpGFPpos	uasgfp_18469	uasgfp_14_EGFPpositive.lsm (cropped)	2.26	83.76	26.47
uasgfpGFPpos	uasgfp_18470	uasgfp_14_EGFPpositive.lsm (cropped)	1.11	66.26	21.35
uasgfpGFPpos	uasgfp_18471	uasgfp_14_EGFPpositive.lsm (cropped)	2.59	95.94	15.38
uasgfpGFPpos	uasgfp_18472	uasgfp_14_EGFPpositive.lsm (cropped)	0.2	61.92	6.92
uasgfpGFPpos	uasgfp_18473	uasgfp_14_EGFPpositive.lsm (cropped)	0.378	46.57	14.83
uasgfpGFPpos	uasgfp_18474	uasgfp_14_EGFPpositive.lsm (cropped)	2.38	93.21	40.49
uasgfpGFPpos	uasgfp_18475	uasgfp_14_EGFPpositive.lsm (cropped)	0.789	95.32	12.54
uasgfpGFPpos	uasgfp_18476	uasgfp_14_EGFPpositive.lsm (cropped)	0.33	70.21	8.38
uasgfpGFPpos	uasgfp_18477	uasgfp_14_EGFPpositive.lsm (cropped)	0.557	64.08	25.13
uasgfpGFPpos	uasgfp_18478	uasgfp_14_EGFPpositive.lsm (cropped)	0.946	65.63	22.51
uasgfpGFPpos	uasgfp_18479	uasgfp_14_EGFPpositive.lsm (cropped)	0.216	67.95	6.97
uasgfpGFPpos	uasgfp_18480	uasgfp_14_EGFPpositive.lsm (cropped)	2.76	88.4	22.66
uasgfpGFPpos	uasgfp_18481	uasgfp_14_EGFPpositive.lsm (cropped)	0.535	56.4	45.34
uasgfpGFPpos	uasgfp_18482	uasgfp_14_EGFPpositive.lsm (cropped)	0.606	56.74	14.59
uasgfpGFPpos	uasgfp_18483	uasgfp_14_EGFPpositive.lsm (cropped)	1.19	70.49	25.41
uasgfpGFPpos	uasgfp_18484	uasgfp_14_EGFPpositive.lsm (cropped)	10.75	89.22	23.7
uasgfpGFPpos	uasgfp_18485	uasgfp_14_EGFPpositive.lsm (cropped)	0.324	61.55	12.58
uasgfpGFPpos	uasgfp_18486	uasgfp_14_EGFPpositive.lsm (cropped)	0.254	73.91	22.49
uasgfpGFPpos	uasgfp_18487	uasgfp_14_EGFPpositive.lsm (cropped)	1.33	63.86	36.21
uasgfpGFPpos	uasgfp_18488	uasgfp_14_EGFPpositive.lsm (cropped)	0.633	57.62	17.92
uasgfpGFPpos	uasgfp_18489	uasgfp_14_EGFPpositive.lsm (cropped)	4.23	100.06	25.83
uasgfpGFPpos	uasgfp_18490	uasgfp_14_EGFPpositive.lsm (cropped)	0.238	59.57	7.91
uasgfpGFPpos	uasgfp_18491	uasgfp_14_EGFPpositive.lsm (cropped)	0.265	63.53	30.14
uasgfpGFPpos	uasgfp_18492	uasgfp_14_EGFPpositive.lsm (cropped)	0.254	77.23	9.53
uasgfpGFPpos	uasgfp_18493	uasgfp_14_EGFPpositive.lsm (cropped)	0.303	49.09	15.7
uasgfpGFPpos	uasgfp_18494	uasgfp_14_EGFPpositive.lsm (cropped)	2.4	93.7	23.65
uasgfpGFPpos	uasgfp_18495	uasgfp_14_EGFPpositive.lsm (cropped)	0.211	72.79	59.08
uasgfpGFPpos	uasgfp_18496	uasgfp_14_EGFPpositive.lsm (cropped)	0.438	53.83	18.77
uasgfpGFPpos	uasgfp_18497	uasgfp_14_EGFPpositive.lsm (cropped)	0.898	74.31	26.22
uasgfpGFPpos	uasgfp_18498	uasgfp_14_EGFPpositive.lsm (cropped)	0.779	59.47	23.51
uasgfpGFPpos	uasgfp_18499	uasgfp_14_EGFPpositive.lsm (cropped)	4.34	93.82	18.08
uasgfpGFPpos	uasgfp_18500	uasgfp_14_EGFPpositive.lsm (cropped)	0.557	61.51	36.42
uasgfpGFPpos	uasgfp_18501	uasgfp_14_EGFPpositive.lsm (cropped)	3.14	89.57	46.17
uasgfpGFPpos	uasgfp_18502	uasgfp_14_EGFPpositive.lsm (cropped)	1.9	80.15	15.01
uasgfpGFPpos	uasgfp_18503	uasgfp_14_EGFPpositive.lsm (cropped)	10	96.28	22.24
uasgfpGFPpos	uasgfp_18504	uasgfp_14_EGFPpositive.lsm (cropped)	2.36	67.69	15.84
uasgfpGFPpos	uasgfp_18505	uasgfp_14_EGFPpositive.lsm (cropped)	0.551	49.1	16
uasgfpGFPpos	uasgfp_18506	uasgfp_14_EGFPpositive.lsm (cropped)	1.16	67.73	17.97
uasgfpGFPpos	uasgfp_18507	uasgfp_14_EGFPpositive.lsm (cropped)	7.4	80.48	22.41
uasgfpGFPpos	uasgfp_18508	uasgfp_14_EGFPpositive.lsm (cropped)	6.1	87.98	18.38
uasgfpGFPpos	uasgfp_18509	uasgfp_14_EGFPpositive.lsm (cropped)	1.51	77.18	14.4
uasgfpGFPpos	uasgfp_18510	uasgfp_14_EGFPpositive.lsm (cropped)	0.308	50.02	9.25
uasgfpGFPpos	uasgfp_18511	uasgfp_14_EGFPpositive.lsm (cropped)	0.222	72.34	35.76
uasgfpGFPpos	uasgfp_18512	uasgfp_14_EGFPpositive.lsm (cropped)	0.708	61.02	16.62
uasgfpGFPpos	uasgfp_18513	uasgfp_14_EGFPpositive.lsm (cropped)	1.02	71.22	21.57
uasgfpGFPpos	uasgfp_18514	uasgfp_14_EGFPpositive.lsm (cropped)	1.8	70.59	18.49
uasgfpGFPpos	uasgfp_18515	uasgfp_14_EGFPpositive.lsm (cropped)	0.746	60.83	25.92
uasgfpGFPpos	uasgfp_18516	uasgfp_14_EGFPpositive.lsm (cropped)	2.02	93.69	27.56
uasgfpGFPpos	uasgfp_18517	uasgfp_14_EGFPpositive.lsm (cropped)	6.55	81.61	17.93
uasgfpGFPpos	uasgfp_18518	uasgfp_14_EGFPpositive.lsm (cropped)	0.368	57.82	11.57
uasgfpGFPpos	uasgfp_18519	uasgfp_14_EGFPpositive.lsm (cropped)	2.89	86.4	31.28
uasgfpGFPpos	uasgfp_18520	uasgfp_14_EGFPpositive.lsm (cropped)	0.784	68.6	8.88
uasgfpGFPpos	uasgfp_18521	uasgfp_14_EGFPpositive.lsm (cropped)	3.36	85.94	19.34
uasgfpGFPpos	uasgfp_18522	uasgfp_14_EGFPpositive.lsm (cropped)	0.341	44.37	16.63
uasgfpGFPpos	uasgfp_18523	uasgfp_14_EGFPpositive.lsm (cropped)	0.827	69.18	21.59
uasgfpGFPpos	uasgfp_18524	uasgfp_14_EGFPpositive.lsm (cropped)	0.487	77.17	13.57
uasgfpGFPpos	uasgfp_18525	uasgfp_14_EGFPpositive.lsm (cropped)	0.276	57.9	8
uasgfpGFPpos	uasgfp_18526	uasgfp_14_EGFPpositive.lsm (cropped)	0.47	69.21	12.46
uasgfpGFPpos	uasgfp_18527	uasgfp_14_EGFPpositive.lsm (cropped)	0.27	53.5	14.34
uasgfpGFPpos	uasgfp_18528	uasgfp_14_EGFPpositive.lsm (cropped)	0.26	68.81	13.92
uasgfpGFPpos	uasgfp_18529	uasgfp_14_EGFPpositive.lsm (cropped)	0.589	105.64	7.29
uasgfpGFPpos	uasgfp_20273	uasgfp_15_EGFPpositive.lsm (cropped)	0.249	86.7	9.28
uasgfpGFPpos	uasgfp_20274	uasgfp_15_EGFPpositive.lsm (cropped)	0.205	76.74	9.97
uasgfpGFPpos	uasgfp_20275	uasgfp_15_EGFPpositive.lsm (cropped)	0.568	69.15	24.13
uasgfpGFPpos	uasgfp_20276	uasgfp_15_EGFPpositive.lsm (cropped)	0.654	65.81	37.24
uasgfpGFPpos	uasgfp_20277	uasgfp_15_EGFPpositive.lsm (cropped)	2.71	92.3	30.45
uasgfpGFPpos	uasgfp_20278	uasgfp_15_EGFPpositive.lsm (cropped)	0.254	71.17	59.15
uasgfpGFPpos	uasgfp_20279	uasgfp_15_EGFPpositive.lsm (cropped)	1.62	82.26	37.83
uasgfpGFPpos	uasgfp_20280	uasgfp_15_EGFPpositive.lsm (cropped)	1.61	92.43	20.89
uasgfpGFPpos	uasgfp_20281	uasgfp_15_EGFPpositive.lsm (cropped)	0.297	82.73	15.25
uasgfpGFPpos	uasgfp_20282	uasgfp_15_EGFPpositive.lsm (cropped)	0.254	89.17	7.64
uasgfpGFPpos	uasgfp_20283	uasgfp_15_EGFPpositive.lsm (cropped)	0.362	54.45	94.69
uasgfpGFPpos	uasgfp_20284	uasgfp_15_EGFPpositive.lsm (cropped)	0.762	63.97	40.42
uasgfpGFPpos	uasgfp_20285	uasgfp_15_EGFPpositive.lsm (cropped)	0.816	74.27	16.94
uasgfpGFPpos	uasgfp_20286	uasgfp_15_EGFPpositive.lsm (cropped)	0.292	61.91	12.11
uasgfpGFPpos	uasgfp_20287	uasgfp_15_EGFPpositive.lsm (cropped)	0.454	64.89	15.9
uasgfpGFPpos	uasgfp_20288	uasgfp_15_EGFPpositive.lsm (cropped)	1.07	94.31	18.56
uasgfpGFPpos	uasgfp_20289	uasgfp_15_EGFPpositive.lsm (cropped)	0.335	82.11	13.21
uasgfpGFPpos	uasgfp_20290	uasgfp_15_EGFPpositive.lsm (cropped)	0.308	61.65	15.02
uasgfpGFPpos	uasgfp_20291	uasgfp_15_EGFPpositive.lsm (cropped)	0.211	55.41	9.33
uasgfpGFPpos	uasgfp_20292	uasgfp_15_EGFPpositive.lsm (cropped)	0.227	60.55	36.67
uasgfpGFPpos	uasgfp_20293	uasgfp_15_EGFPpositive.lsm (cropped)	0.368	62.56	33.53
uasgfpGFPpos	uasgfp_20294	uasgfp_15_EGFPpositive.lsm (cropped)	0.952	79.55	13.91
uasgfpGFPpos	uasgfp_20295	uasgfp_15_EGFPpositive.lsm (cropped)	0.492	56.07	15.48
uasgfpGFPpos	uasgfp_20296	uasgfp_15_EGFPpositive.lsm (cropped)	5.78	86.54	71.97
uasgfpGFPpos	uasgfp_20297	uasgfp_15_EGFPpositive.lsm (cropped)	0.232	87.19	21.28
uasgfpGFPpos	uasgfp_20298	uasgfp_15_EGFPpositive.lsm (cropped)	0.519	61.98	47.82
uasgfpGFPpos	uasgfp_20299	uasgfp_15_EGFPpositive.lsm (cropped)	1.15	65.28	51.38
uasgfpGFPpos	uasgfp_20300	uasgfp_15_EGFPpositive.lsm (cropped)	0.357	62.76	21.47
uasgfpGFPpos	uasgfp_20301	uasgfp_15_EGFPpositive.lsm (cropped)	0.827	66.54	28.34
uasgfpGFPpos	uasgfp_20302	uasgfp_15_EGFPpositive.lsm (cropped)	0.368	64.37	21.44
uasgfpGFPpos	uasgfp_20303	uasgfp_15_EGFPpositive.lsm (cropped)	1.2	86.84	35.46
uasgfpGFPpos	uasgfp_20304	uasgfp_15_EGFPpositive.lsm (cropped)	0.357	49.95	11.27
uasgfpGFPpos	uasgfp_20305	uasgfp_15_EGFPpositive.lsm (cropped)	1.44	67.56	17.85
uasgfpGFPpos	uasgfp_20306	uasgfp_15_EGFPpositive.lsm (cropped)	3.22	105.5	14.01
uasgfpGFPpos	uasgfp_20307	uasgfp_15_EGFPpositive.lsm (cropped)	0.373	66.81	20.78
uasgfpGFPpos	uasgfp_20308	uasgfp_15_EGFPpositive.lsm (cropped)	0.249	54.07	19.43
uasgfpGFPpos	uasgfp_20309	uasgfp_15_EGFPpositive.lsm (cropped)	0.433	63.79	17.29
uasgfpGFPpos	uasgfp_20310	uasgfp_15_EGFPpositive.lsm (cropped)	0.919	79.25	30.84
uasgfpGFPpos	uasgfp_20311	uasgfp_15_EGFPpositive.lsm (cropped)	1.64	68.39	31.5
uasgfpGFPpos	uasgfp_20312	uasgfp_15_EGFPpositive.lsm (cropped)	0.643	68.05	15.87
uasgfpGFPpos	uasgfp_20313	uasgfp_15_EGFPpositive.lsm (cropped)	0.984	69.91	21.54
uasgfpGFPpos	uasgfp_20314	uasgfp_15_EGFPpositive.lsm (cropped)	1.31	77.18	24.35
uasgfpGFPpos	uasgfp_20315	uasgfp_15_EGFPpositive.lsm (cropped)	0.995	71.92	16.36
uasgfpGFPpos	uasgfp_20316	uasgfp_15_EGFPpositive.lsm (cropped)	0.346	59.91	19.14
uasgfpGFPpos	uasgfp_20317	uasgfp_15_EGFPpositive.lsm (cropped)	0.351	84.28	13.68
uasgfpGFPpos	uasgfp_20318	uasgfp_15_EGFPpositive.lsm (cropped)	2.26	85.23	64.13
uasgfpGFPpos	uasgfp_20319	uasgfp_15_EGFPpositive.lsm (cropped)	0.2	75.97	23.22
uasgfpGFPpos	uasgfp_20320	uasgfp_15_EGFPpositive.lsm (cropped)	2.36	96.19	24.94
uasgfpGFPpos	uasgfp_20321	uasgfp_15_EGFPpositive.lsm (cropped)	0.314	60.05	29.71
uasgfpGFPpos	uasgfp_20322	uasgfp_15_EGFPpositive.lsm (cropped)	0.541	101.44	9.81
uasgfpGFPpos	uasgfp_20323	uasgfp_15_EGFPpositive.lsm (cropped)	0.2	61.62	23.27
uasgfpGFPpos	uasgfp_20324	uasgfp_15_EGFPpositive.lsm (cropped)	1.88	89.13	10.24
uasgfpGFPpos	uasgfp_20325	uasgfp_15_EGFPpositive.lsm (cropped)	0.27	58.04	45.8
uasgfpGFPpos	uasgfp_20326	uasgfp_15_EGFPpositive.lsm (cropped)	1.18	63.07	32.92
uasgfpGFPpos	uasgfp_20327	uasgfp_15_EGFPpositive.lsm (cropped)	3.61	102.99	20.97
uasgfpGFPpos	uasgfp_20328	uasgfp_15_EGFPpositive.lsm (cropped)	1.42	64.34	24.76
uasgfpGFPpos	uasgfp_20329	uasgfp_15_EGFPpositive.lsm (cropped)	0.795	80.83	13.32
uasgfpGFPpos	uasgfp_20330	uasgfp_15_EGFPpositive.lsm (cropped)	0.319	65.81	11.25
uasgfpGFPpos	uasgfp_20331	uasgfp_15_EGFPpositive.lsm (cropped)	6.53	93.37	27.98
uasgfpGFPpos	uasgfp_20332	uasgfp_15_EGFPpositive.lsm (cropped)	1.19	69	23.37
uasgfpGFPpos	uasgfp_20333	uasgfp_15_EGFPpositive.lsm (cropped)	0.297	67.45	79.67
uasgfpGFPpos	uasgfp_20334	uasgfp_15_EGFPpositive.lsm (cropped)	2.58	73.77	39.47
uasgfpGFPpos	uasgfp_20335	uasgfp_15_EGFPpositive.lsm (cropped)	1.1	92.48	27.11
uasgfpGFPpos	uasgfp_20336	uasgfp_15_EGFPpositive.lsm (cropped)	1.02	69.09	19.87
uasgfpGFPpos	uasgfp_20337	uasgfp_15_EGFPpositive.lsm (cropped)	0.373	54.96	20.71
uasgfpGFPpos	uasgfp_20338	uasgfp_15_EGFPpositive.lsm (cropped)	0.314	68.45	29.34
uasgfpGFPpos	uasgfp_20339	uasgfp_15_EGFPpositive.lsm (cropped)	0.449	100.48	66.81
uasgfpGFPpos	uasgfp_20340	uasgfp_15_EGFPpositive.lsm (cropped)	1.91	86.14	30.97
uasgfpGFPpos	uasgfp_20341	uasgfp_15_EGFPpositive.lsm (cropped)	0.676	79.5	42.47
uasgfpGFPpos	uasgfp_20342	uasgfp_15_EGFPpositive.lsm (cropped)	0.481	60.72	41.7
uasgfpGFPpos	uasgfp_20343	uasgfp_15_EGFPpositive.lsm (cropped)	0.697	57.7	37.7
uasgfpGFPpos	uasgfp_20344	uasgfp_15_EGFPpositive.lsm (cropped)	2.55	68.31	27.37
uasgfpGFPpos	uasgfp_20345	uasgfp_15_EGFPpositive.lsm (cropped)	1.66	74.29	24.1
uasgfpGFPpos	uasgfp_20346	uasgfp_15_EGFPpositive.lsm (cropped)	3.57	113.94	34.05
uasgfpGFPpos	uasgfp_20347	uasgfp_15_EGFPpositive.lsm (cropped)	0.281	104.21	16.5
uasgfpGFPpos	uasgfp_20348	uasgfp_15_EGFPpositive.lsm (cropped)	2.22	83.98	44.21
uasgfpGFPpos	uasgfp_20349	uasgfp_15_EGFPpositive.lsm (cropped)	1.01	97.18	74.84
uasgfpGFPpos	uasgfp_20350	uasgfp_15_EGFPpositive.lsm (cropped)	20.75	97.3	48.01
uasgfpGFPpos	uasgfp_20351	uasgfp_15_EGFPpositive.lsm (cropped)	0.26	51.77	21.69
uasgfpGFPpos	uasgfp_20352	uasgfp_15_EGFPpositive.lsm (cropped)	1.63	88.28	8.82
uasgfpGFPpos	uasgfp_20353	uasgfp_15_EGFPpositive.lsm (cropped)	8.08	111.38	32.49
uasgfpGFPpos	uasgfp_20354	uasgfp_15_EGFPpositive.lsm (cropped)	6.61	109.27	30.22
uasgfpGFPpos	uasgfp_20355	uasgfp_15_EGFPpositive.lsm (cropped)	1.54	71.92	21.6
uasgfpGFPpos	uasgfp_20356	uasgfp_15_EGFPpositive.lsm (cropped)	0.703	109.84	15.32
uasgfpGFPpos	uasgfp_20357	uasgfp_15_EGFPpositive.lsm (cropped)	0.519	61.1	22.55
uasgfpGFPpos	uasgfp_20358	uasgfp_15_EGFPpositive.lsm (cropped)	0.968	89.94	25.5
uasgfpGFPpos	uasgfp_20359	uasgfp_15_EGFPpositive.lsm (cropped)	0.308	86.81	13.49
uasgfpGFPpos	uasgfp_20360	uasgfp_15_EGFPpositive.lsm (cropped)	0.265	66.9	8.69
uasgfpGFPpos	uasgfp_20361	uasgfp_15_EGFPpositive.lsm (cropped)	0.87	59.11	33.74
uasgfpGFPpos	uasgfp_20362	uasgfp_15_EGFPpositive.lsm (cropped)	0.308	62.79	14.42
uasgfpGFPpos	uasgfp_20363	uasgfp_15_EGFPpositive.lsm (cropped)	3.03	92.37	37.82
uasgfpGFPpos	uasgfp_20364	uasgfp_15_EGFPpositive.lsm (cropped)	0.26	56.77	25.83
uasgfpGFPpos	uasgfp_20365	uasgfp_15_EGFPpositive.lsm (cropped)	2.3	65.35	28.56
uasgfpGFPpos	uasgfp_20366	uasgfp_15_EGFPpositive.lsm (cropped)	0.724	74.16	27.45
uasgfpGFPpos	uasgfp_20367	uasgfp_15_EGFPpositive.lsm (cropped)	0.503	59.33	35.96
uasgfpGFPpos	uasgfp_20368	uasgfp_15_EGFPpositive.lsm (cropped)	0.773	62.62	10.03
uasgfpGFPpos	uasgfp_20369	uasgfp_15_EGFPpositive.lsm (cropped)	0.546	74.61	12.66
uasgfpGFPpos	uasgfp_20370	uasgfp_15_EGFPpositive.lsm (cropped)	0.357	56.79	28.47
uasgfpGFPpos	uasgfp_20371	uasgfp_15_EGFPpositive.lsm (cropped)	2.86	92.37	20.67
uasgfpGFPpos	uasgfp_20372	uasgfp_15_EGFPpositive.lsm (cropped)	2.5	96.63	30.35
uasgfpGFPpos	uasgfp_20373	uasgfp_15_EGFPpositive.lsm (cropped)	0.27	60.02	12.4
uasgfpGFPpos	uasgfp_20374	uasgfp_15_EGFPpositive.lsm (cropped)	0.454	78.19	15.32
uasgfpGFPpos	uasgfp_20375	uasgfp_15_EGFPpositive.lsm (cropped)	0.216	72.53	5.8
uasgfpGFPpos	uasgfp_20376	uasgfp_15_EGFPpositive.lsm (cropped)	0.243	75.78	14.18
uasgfpGFPpos	uasgfp_20377	uasgfp_15_EGFPpositive.lsm (cropped)	0.232	60.74	21.56
uasgfpGFPpos	uasgfp_20378	uasgfp_15_EGFPpositive.lsm (cropped)	0.627	60.27	17.72
uasgfpGFPpos	uasgfp_20379	uasgfp_15_EGFPpositive.lsm (cropped)	0.357	54.88	44.32
uasgfpGFPpos	uasgfp_20380	uasgfp_15_EGFPpositive.lsm (cropped)	1.28	79.86	30.83
uasgfpGFPpos	uasgfp_20381	uasgfp_15_EGFPpositive.lsm (cropped)	0.243	76.02	9.98
uasgfpGFPpos	uasgfp_20382	uasgfp_15_EGFPpositive.lsm (cropped)	0.908	72.25	35.46
uasgfpGFPpos	uasgfp_20383	uasgfp_15_EGFPpositive.lsm (cropped)	0.4	106.42	8.72
uasgfpGFPpos	uasgfp_20384	uasgfp_15_EGFPpositive.lsm (cropped)	1.87	73.42	58.53
uasgfpGFPpos	uasgfp_20385	uasgfp_15_EGFPpositive.lsm (cropped)	0.443	72.33	14.6
uasgfpGFPpos	uasgfp_20386	uasgfp_15_EGFPpositive.lsm (cropped)	2.27	102.43	22.06
uasgfpGFPpos	uasgfp_20387	uasgfp_15_EGFPpositive.lsm (cropped)	0.816	79.15	18.36
uasgfpGFPpos	uasgfp_20388	uasgfp_15_EGFPpositive.lsm (cropped)	0.497	52.89	28.04
uasgfpGFPpos	uasgfp_20389	uasgfp_15_EGFPpositive.lsm (cropped)	4.54	93.93	28.38
uasgfpGFPpos	uasgfp_20390	uasgfp_15_EGFPpositive.lsm (cropped)	0.806	106.07	5.85
uasgfpGFPpos	uasgfp_20391	uasgfp_15_EGFPpositive.lsm (cropped)	4.11	76.36	22.88
uasgfpGFPpos	uasgfp_20392	uasgfp_15_EGFPpositive.lsm (cropped)	0.33	63.16	24.89
uasgfpGFPpos	uasgfp_20393	uasgfp_15_EGFPpositive.lsm (cropped)	1.75	74.48	26.61
uasgfpGFPpos	uasgfp_20394	uasgfp_15_EGFPpositive.lsm (cropped)	4.07	82.25	21.49
uasgfpGFPpos	uasgfp_20395	uasgfp_15_EGFPpositive.lsm (cropped)	3.14	74.38	36.89
uasgfpGFPpos	uasgfp_20396	uasgfp_15_EGFPpositive.lsm (cropped)	6.51	101.71	25.04
uasgfpGFPpos	uasgfp_20397	uasgfp_15_EGFPpositive.lsm (cropped)	0.205	55.05	22.39
uasgfpGFPpos	uasgfp_20398	uasgfp_15_EGFPpositive.lsm (cropped)	0.833	57.79	13.08
uasgfpGFPpos	uasgfp_20399	uasgfp_15_EGFPpositive.lsm (cropped)	0.276	63.88	15.1
uasgfpGFPpos	uasgfp_20400	uasgfp_15_EGFPpositive.lsm (cropped)	0.562	68.21	11.6
uasgfpGFPpos	uasgfp_20401	uasgfp_15_EGFPpositive.lsm (cropped)	3.69	88.6	19.8
uasgfpGFPpos	uasgfp_20402	uasgfp_15_EGFPpositive.lsm (cropped)	2.19	78.17	14.7
uasgfpGFPpos	uasgfp_21694	uasgfp_16_EGFPpositive.lsm (cropped)	4.36	103.6	10.83
uasgfpGFPpos	uasgfp_21695	uasgfp_16_EGFPpositive.lsm (cropped)	2.88	89.2	25.23
uasgfpGFPpos	uasgfp_21696	uasgfp_16_EGFPpositive.lsm (cropped)	1.7	77.63	77.69
uasgfpGFPpos	uasgfp_21697	uasgfp_16_EGFPpositive.lsm (cropped)	0.481	62.97	9.69
uasgfpGFPpos	uasgfp_21698	uasgfp_16_EGFPpositive.lsm (cropped)	0.232	58.05	8.74
uasgfpGFPpos	uasgfp_21699	uasgfp_16_EGFPpositive.lsm (cropped)	1.31	81.67	28.66
uasgfpGFPpos	uasgfp_21700	uasgfp_16_EGFPpositive.lsm (cropped)	0.341	51.16	10.1
uasgfpGFPpos	uasgfp_21701	uasgfp_16_EGFPpositive.lsm (cropped)	0.438	64.3	13.01
uasgfpGFPpos	uasgfp_21702	uasgfp_16_EGFPpositive.lsm (cropped)	0.633	98.87	20.73
uasgfpGFPpos	uasgfp_21703	uasgfp_16_EGFPpositive.lsm (cropped)	0.67	82.27	25.69
uasgfpGFPpos	uasgfp_21704	uasgfp_16_EGFPpositive.lsm (cropped)	1.19	69.31	31.65
uasgfpGFPpos	uasgfp_21705	uasgfp_16_EGFPpositive.lsm (cropped)	0.633	57.28	50.63
uasgfpGFPpos	uasgfp_21706	uasgfp_16_EGFPpositive.lsm (cropped)	0.254	72.51	9.19
uasgfpGFPpos	uasgfp_21707	uasgfp_16_EGFPpositive.lsm (cropped)	2.77	116.02	13.15
uasgfpGFPpos	uasgfp_21708	uasgfp_16_EGFPpositive.lsm (cropped)	1.8	96.42	30.11
uasgfpGFPpos	uasgfp_21709	uasgfp_16_EGFPpositive.lsm (cropped)	0.697	78.22	15.57
uasgfpGFPpos	uasgfp_21710	uasgfp_16_EGFPpositive.lsm (cropped)	3.17	94.38	29.02
uasgfpGFPpos	uasgfp_21711	uasgfp_16_EGFPpositive.lsm (cropped)	0.303	65.96	10.93
uasgfpGFPpos	uasgfp_21712	uasgfp_16_EGFPpositive.lsm (cropped)	3.15	100	16.75
uasgfpGFPpos	uasgfp_21713	uasgfp_16_EGFPpositive.lsm (cropped)	0.368	67.63	25.84
uasgfpGFPpos	uasgfp_21714	uasgfp_16_EGFPpositive.lsm (cropped)	1.14	82	14.48
uasgfpGFPpos	uasgfp_21715	uasgfp_16_EGFPpositive.lsm (cropped)	0.303	58.57	11.16
uasgfpGFPpos	uasgfp_21716	uasgfp_16_EGFPpositive.lsm (cropped)	0.4	72.72	41.62
uasgfpGFPpos	uasgfp_21717	uasgfp_16_EGFPpositive.lsm (cropped)	1.68	92.12	31.04
uasgfpGFPpos	uasgfp_21718	uasgfp_16_EGFPpositive.lsm (cropped)	0.227	111.07	11.74
uasgfpGFPpos	uasgfp_21719	uasgfp_16_EGFPpositive.lsm (cropped)	0.2	73.24	11.16
uasgfpGFPpos	uasgfp_21720	uasgfp_16_EGFPpositive.lsm (cropped)	0.708	64.9	22.76
uasgfpGFPpos	uasgfp_21721	uasgfp_16_EGFPpositive.lsm (cropped)	1.12	63.41	11.23
uasgfpGFPpos	uasgfp_21722	uasgfp_16_EGFPpositive.lsm (cropped)	0.595	59.77	23.45
uasgfpGFPpos	uasgfp_21723	uasgfp_16_EGFPpositive.lsm (cropped)	0.292	61.19	24.69
uasgfpGFPpos	uasgfp_21724	uasgfp_16_EGFPpositive.lsm (cropped)	1.04	73.31	49.53
uasgfpGFPpos	uasgfp_21725	uasgfp_16_EGFPpositive.lsm (cropped)	5.41	88.1	39.18
uasgfpGFPpos	uasgfp_21726	uasgfp_16_EGFPpositive.lsm (cropped)	0.2	53.84	15.84
uasgfpGFPpos	uasgfp_21727	uasgfp_16_EGFPpositive.lsm (cropped)	0.303	57.32	21.2
uasgfpGFPpos	uasgfp_21728	uasgfp_16_EGFPpositive.lsm (cropped)	0.297	89.02	9.98
uasgfpGFPpos	uasgfp_21729	uasgfp_16_EGFPpositive.lsm (cropped)	0.227	80.98	15.12
uasgfpGFPpos	uasgfp_21730	uasgfp_16_EGFPpositive.lsm (cropped)	2.27	83.76	17.46
uasgfpGFPpos	uasgfp_21731	uasgfp_16_EGFPpositive.lsm (cropped)	1.08	85.88	30.23
uasgfpGFPpos	uasgfp_21732	uasgfp_16_EGFPpositive.lsm (cropped)	0.465	99.85	29.64
uasgfpGFPpos	uasgfp_21733	uasgfp_16_EGFPpositive.lsm (cropped)	1.07	68.48	21.99
uasgfpGFPpos	uasgfp_21734	uasgfp_16_EGFPpositive.lsm (cropped)	1.04	67.28	34.13
uasgfpGFPpos	uasgfp_21735	uasgfp_16_EGFPpositive.lsm (cropped)	0.362	89.55	7.75
uasgfpGFPpos	uasgfp_21736	uasgfp_16_EGFPpositive.lsm (cropped)	1.48	87.26	45.12
uasgfpGFPpos	uasgfp_21737	uasgfp_16_EGFPpositive.lsm (cropped)	0.222	60.34	23.85
uasgfpGFPpos	uasgfp_21738	uasgfp_16_EGFPpositive.lsm (cropped)	0.925	74.27	26.29
uasgfpGFPpos	uasgfp_21739	uasgfp_16_EGFPpositive.lsm (cropped)	0.324	54.5	25.52
uasgfpGFPpos	uasgfp_21740	uasgfp_16_EGFPpositive.lsm (cropped)	0.773	81.45	35.85
uasgfpGFPpos	uasgfp_21741	uasgfp_16_EGFPpositive.lsm (cropped)	1.25	65.07	28.23
uasgfpGFPpos	uasgfp_21742	uasgfp_16_EGFPpositive.lsm (cropped)	1.27	74.41	33.4
uasgfpGFPpos	uasgfp_21743	uasgfp_16_EGFPpositive.lsm (cropped)	1.61	76.34	33.64
uasgfpGFPpos	uasgfp_21744	uasgfp_16_EGFPpositive.lsm (cropped)	4.9	69.02	26.94
uasgfpGFPpos	uasgfp_21745	uasgfp_16_EGFPpositive.lsm (cropped)	0.232	63.88	19
uasgfpGFPpos	uasgfp_21746	uasgfp_16_EGFPpositive.lsm (cropped)	0.2	60.19	18.46
uasgfpGFPpos	uasgfp_21747	uasgfp_16_EGFPpositive.lsm (cropped)	0.779	69.36	26.13
uasgfpGFPpos	uasgfp_21748	uasgfp_16_EGFPpositive.lsm (cropped)	0.649	65.15	20.91
uasgfpGFPpos	uasgfp_21749	uasgfp_16_EGFPpositive.lsm (cropped)	0.308	64.96	28.07
uasgfpGFPpos	uasgfp_21750	uasgfp_16_EGFPpositive.lsm (cropped)	1.67	68.47	74.16
uasgfpGFPpos	uasgfp_21751	uasgfp_16_EGFPpositive.lsm (cropped)	5.59	74.3	30.95
uasgfpGFPpos	uasgfp_21752	uasgfp_16_EGFPpositive.lsm (cropped)	0.638	65.26	52.19
uasgfpGFPpos	uasgfp_21753	uasgfp_16_EGFPpositive.lsm (cropped)	1.24	78.52	17.42
uasgfpGFPpos	uasgfp_21754	uasgfp_16_EGFPpositive.lsm (cropped)	2.49	60.47	23.2
uasgfpGFPpos	uasgfp_21755	uasgfp_16_EGFPpositive.lsm (cropped)	0.308	49	25.68
uasgfpGFPpos	uasgfp_21756	uasgfp_16_EGFPpositive.lsm (cropped)	0.281	67.12	20.21
uasgfpGFPpos	uasgfp_21757	uasgfp_16_EGFPpositive.lsm (cropped)	0.643	89.55	19.94
uasgfpGFPpos	uasgfp_21758	uasgfp_16_EGFPpositive.lsm (cropped)	0.249	87.2	11.37
uasgfpGFPpos	uasgfp_21759	uasgfp_16_EGFPpositive.lsm (cropped)	0.606	59.74	25.79
uasgfpGFPpos	uasgfp_21760	uasgfp_16_EGFPpositive.lsm (cropped)	0.584	61.5	15.29
uasgfpGFPpos	uasgfp_21761	uasgfp_16_EGFPpositive.lsm (cropped)	2.02	110.7	12.2
uasgfpGFPpos	uasgfp_21762	uasgfp_16_EGFPpositive.lsm (cropped)	0.4	53.66	17.14
uasgfpGFPpos	uasgfp_21763	uasgfp_16_EGFPpositive.lsm (cropped)	4.15	87.87	23.87
uasgfpGFPpos	uasgfp_21764	uasgfp_16_EGFPpositive.lsm (cropped)	0.314	85.71	28.17
uasgfpGFPpos	uasgfp_21765	uasgfp_16_EGFPpositive.lsm (cropped)	0.795	59.67	21.75
uasgfpGFPpos	uasgfp_21766	uasgfp_16_EGFPpositive.lsm (cropped)	6.83	88.52	33.27
uasgfpGFPpos	uasgfp_21767	uasgfp_16_EGFPpositive.lsm (cropped)	0.319	49.47	28.75
uasgfpGFPpos	uasgfp_21768	uasgfp_16_EGFPpositive.lsm (cropped)	0.697	61.53	17.51
uasgfpGFPpos	uasgfp_21769	uasgfp_16_EGFPpositive.lsm (cropped)	0.406	55.24	16.69
uasgfpGFPpos	uasgfp_21770	uasgfp_16_EGFPpositive.lsm (cropped)	0.795	74.97	15.3
uasgfpGFPpos	uasgfp_21771	uasgfp_16_EGFPpositive.lsm (cropped)	0.216	60.27	16.93
uasgfpGFPpos	uasgfp_21772	uasgfp_16_EGFPpositive.lsm (cropped)	1.45	72.2	27.87
uasgfpGFPpos	uasgfp_21773	uasgfp_16_EGFPpositive.lsm (cropped)	11.39	96.46	29.83
uasgfpGFPpos	uasgfp_21774	uasgfp_16_EGFPpositive.lsm (cropped)	1.64	59.64	30.11
uasgfpGFPpos	uasgfp_21775	uasgfp_16_EGFPpositive.lsm (cropped)	0.222	53.27	14.63
uasgfpGFPpos	uasgfp_21776	uasgfp_16_EGFPpositive.lsm (cropped)	0.395	78.21	81.12
uasgfpGFPpos	uasgfp_21777	uasgfp_16_EGFPpositive.lsm (cropped)	0.249	84.67	20.8
uasgfpGFPpos	uasgfp_21778	uasgfp_16_EGFPpositive.lsm (cropped)	1.14	63.51	25.67
uasgfpGFPpos	uasgfp_21779	uasgfp_16_EGFPpositive.lsm (cropped)	1.39	55.28	34.01
uasgfpGFPpos	uasgfp_21780	uasgfp_16_EGFPpositive.lsm (cropped)	5.32	77.07	30.88
uasgfpGFPpos	uasgfp_21781	uasgfp_16_EGFPpositive.lsm (cropped)	2.97	80.79	22.36
uasgfpGFPpos	uasgfp_21782	uasgfp_16_EGFPpositive.lsm (cropped)	1.29	71.71	16.41
uasgfpGFPpos	uasgfp_21783	uasgfp_16_EGFPpositive.lsm (cropped)	4.62	104.89	26.97
uasgfpGFPpos	uasgfp_21784	uasgfp_16_EGFPpositive.lsm (cropped)	0.676	72.34	48.4
uasgfpGFPpos	uasgfp_21785	uasgfp_16_EGFPpositive.lsm (cropped)	0.287	81.58	20.89
uasgfpGFPpos	uasgfp_21786	uasgfp_16_EGFPpositive.lsm (cropped)	0.606	59.38	14.34
uasgfpGFPpos	uasgfp_21787	uasgfp_16_EGFPpositive.lsm (cropped)	0.2	52.84	16.7
uasgfpGFPpos	uasgfp_21788	uasgfp_16_EGFPpositive.lsm (cropped)	0.93	72.77	19.1
uasgfpGFPpos	uasgfp_21789	uasgfp_16_EGFPpositive.lsm (cropped)	3.76	94.95	35.85
uasgfpGFPpos	uasgfp_21790	uasgfp_16_EGFPpositive.lsm (cropped)	0.243	63.6	13.33
uasgfpGFPpos	uasgfp_21791	uasgfp_16_EGFPpositive.lsm (cropped)	2.75	76.35	15.63
uasgfpGFPpos	uasgfp_21792	uasgfp_16_EGFPpositive.lsm (cropped)	2.01	75.93	23.67
uasgfpGFPpos	uasgfp_21793	uasgfp_16_EGFPpositive.lsm (cropped)	0.297	48.64	30.25
uasgfpGFPpos	uasgfp_21794	uasgfp_16_EGFPpositive.lsm (cropped)	0.47	55.75	81.05
uasgfpGFPpos	uasgfp_21795	uasgfp_16_EGFPpositive.lsm (cropped)	2.76	81.7	26.8
uasgfpGFPpos	uasgfp_21796	uasgfp_16_EGFPpositive.lsm (cropped)	0.319	75.63	15.8
uasgfpGFPpos	uasgfp_21797	uasgfp_16_EGFPpositive.lsm (cropped)	1.02	70.87	25.01
uasgfpGFPpos	uasgfp_21798	uasgfp_16_EGFPpositive.lsm (cropped)	3.51	68.48	18.68
uasgfpGFPpos	uasgfp_21799	uasgfp_16_EGFPpositive.lsm (cropped)	5.44	80.16	22.16
uasgfpGFPpos	uasgfp_21800	uasgfp_16_EGFPpositive.lsm (cropped)	0.606	62.75	14.18
uasgfpGFPpos	uasgfp_21801	uasgfp_16_EGFPpositive.lsm (cropped)	0.979	79.78	18.86
uasgfpGFPpos	uasgfp_21802	uasgfp_16_EGFPpositive.lsm (cropped)	0.232	79	5.02
uasgfpGFPpos	uasgfp_21803	uasgfp_16_EGFPpositive.lsm (cropped)	0.205	59.97	11.71
uasgfpGFPpos	uasgfp_21804	uasgfp_16_EGFPpositive.lsm (cropped)	0.633	83.58	12.24
uasgfpGFPpos	uasgfp_21805	uasgfp_16_EGFPpositive.lsm (cropped)	0.232	66.47	19.93
uasgfpGFPpos	uasgfp_21806	uasgfp_16_EGFPpositive.lsm (cropped)	0.697	66.33	11.8
uasgfpGFPpos	uasgfp_21807	uasgfp_16_EGFPpositive.lsm (cropped)	1.8	79.92	12.87
uasgfpGFPpos	uasgfp_21808	uasgfp_16_EGFPpositive.lsm (cropped)	0.476	94.23	26.84
uasgfpGFPpos	uasgfp_21809	uasgfp_16_EGFPpositive.lsm (cropped)	2.95	68.67	9.04
uasgfpGFPpos	uasgfp_21810	uasgfp_16_EGFPpositive.lsm (cropped)	0.557	62.6	8.79
uasgfpGFPpos	uasgfp_23315	uasgfp_17_EGFPpositive.lsm (cropped)	2.45	85.93	28.77
uasgfpGFPpos	uasgfp_23316	uasgfp_17_EGFPpositive.lsm (cropped)	0.232	59.77	56.53
uasgfpGFPpos	uasgfp_23317	uasgfp_17_EGFPpositive.lsm (cropped)	1.58	74.5	34.41
uasgfpGFPpos	uasgfp_23318	uasgfp_17_EGFPpositive.lsm (cropped)	0.476	66.51	23.47
uasgfpGFPpos	uasgfp_23319	uasgfp_17_EGFPpositive.lsm (cropped)	0.503	64.97	34.03
uasgfpGFPpos	uasgfp_23320	uasgfp_17_EGFPpositive.lsm (cropped)	0.308	54.23	12.35
uasgfpGFPpos	uasgfp_23321	uasgfp_17_EGFPpositive.lsm (cropped)	1.4	88.43	22.94
uasgfpGFPpos	uasgfp_23322	uasgfp_17_EGFPpositive.lsm (cropped)	0.26	83.4	17
uasgfpGFPpos	uasgfp_23323	uasgfp_17_EGFPpositive.lsm (cropped)	0.627	62.09	38.19
uasgfpGFPpos	uasgfp_23324	uasgfp_17_EGFPpositive.lsm (cropped)	0.779	66.36	14.69
uasgfpGFPpos	uasgfp_23325	uasgfp_17_EGFPpositive.lsm (cropped)	1.11	81.83	17.93
uasgfpGFPpos	uasgfp_23326	uasgfp_17_EGFPpositive.lsm (cropped)	0.205	50.05	8.13
uasgfpGFPpos	uasgfp_23327	uasgfp_17_EGFPpositive.lsm (cropped)	0.492	56.27	14.63
uasgfpGFPpos	uasgfp_23328	uasgfp_17_EGFPpositive.lsm (cropped)	0.319	50.29	102.64
uasgfpGFPpos	uasgfp_23329	uasgfp_17_EGFPpositive.lsm (cropped)	1.22	78.61	33.54
uasgfpGFPpos	uasgfp_23330	uasgfp_17_EGFPpositive.lsm (cropped)	0.308	79.93	12.81
uasgfpGFPpos	uasgfp_23331	uasgfp_17_EGFPpositive.lsm (cropped)	0.314	56.1	14.55
uasgfpGFPpos	uasgfp_23332	uasgfp_17_EGFPpositive.lsm (cropped)	0.854	74.78	14.17
uasgfpGFPpos	uasgfp_23333	uasgfp_17_EGFPpositive.lsm (cropped)	0.454	52.24	16.24
uasgfpGFPpos	uasgfp_23334	uasgfp_17_EGFPpositive.lsm (cropped)	5.39	80.21	71.06
uasgfpGFPpos	uasgfp_23335	uasgfp_17_EGFPpositive.lsm (cropped)	0.238	75	19.95
uasgfpGFPpos	uasgfp_23336	uasgfp_17_EGFPpositive.lsm (cropped)	1.18	61.78	47.95
uasgfpGFPpos	uasgfp_23337	uasgfp_17_EGFPpositive.lsm (cropped)	0.795	60.78	28.17
uasgfpGFPpos	uasgfp_23338	uasgfp_17_EGFPpositive.lsm (cropped)	0.362	61.84	18.67
uasgfpGFPpos	uasgfp_23339	uasgfp_17_EGFPpositive.lsm (cropped)	0.319	61.03	29.39
uasgfpGFPpos	uasgfp_23340	uasgfp_17_EGFPpositive.lsm (cropped)	0.276	46.61	9.25
uasgfpGFPpos	uasgfp_23341	uasgfp_17_EGFPpositive.lsm (cropped)	1.39	61.47	16.07
uasgfpGFPpos	uasgfp_23342	uasgfp_17_EGFPpositive.lsm (cropped)	3.14	100.51	13.28
uasgfpGFPpos	uasgfp_23343	uasgfp_17_EGFPpositive.lsm (cropped)	0.33	61.34	20.28
uasgfpGFPpos	uasgfp_23344	uasgfp_17_EGFPpositive.lsm (cropped)	0.314	60.72	21.45
uasgfpGFPpos	uasgfp_23345	uasgfp_17_EGFPpositive.lsm (cropped)	0.373	58.42	18.41
uasgfpGFPpos	uasgfp_23346	uasgfp_17_EGFPpositive.lsm (cropped)	0.227	50.64	16.76
uasgfpGFPpos	uasgfp_23347	uasgfp_17_EGFPpositive.lsm (cropped)	0.968	69.24	29.73
uasgfpGFPpos	uasgfp_23348	uasgfp_17_EGFPpositive.lsm (cropped)	0.211	55.97	7.79
uasgfpGFPpos	uasgfp_23349	uasgfp_17_EGFPpositive.lsm (cropped)	1.64	62.39	29.88
uasgfpGFPpos	uasgfp_23350	uasgfp_17_EGFPpositive.lsm (cropped)	1.11	60.74	21.21
uasgfpGFPpos	uasgfp_23351	uasgfp_17_EGFPpositive.lsm (cropped)	1.31	69.04	22.83
uasgfpGFPpos	uasgfp_23352	uasgfp_17_EGFPpositive.lsm (cropped)	0.979	69.06	15.9
uasgfpGFPpos	uasgfp_23353	uasgfp_17_EGFPpositive.lsm (cropped)	0.249	79.07	13.54
uasgfpGFPpos	uasgfp_23354	uasgfp_17_EGFPpositive.lsm (cropped)	2.26	90.3	23.29
uasgfpGFPpos	uasgfp_23355	uasgfp_17_EGFPpositive.lsm (cropped)	0.497	57.12	44.45
uasgfpGFPpos	uasgfp_23356	uasgfp_17_EGFPpositive.lsm (cropped)	0.227	50.71	17.52
uasgfpGFPpos	uasgfp_23357	uasgfp_17_EGFPpositive.lsm (cropped)	2.23	76.23	57.65
uasgfpGFPpos	uasgfp_23358	uasgfp_17_EGFPpositive.lsm (cropped)	0.514	60.51	15.61
uasgfpGFPpos	uasgfp_23359	uasgfp_17_EGFPpositive.lsm (cropped)	0.287	57.53	29.96
uasgfpGFPpos	uasgfp_23360	uasgfp_17_EGFPpositive.lsm (cropped)	0.281	78.87	12.29
uasgfpGFPpos	uasgfp_23361	uasgfp_17_EGFPpositive.lsm (cropped)	0.211	78.13	12
uasgfpGFPpos	uasgfp_23362	uasgfp_17_EGFPpositive.lsm (cropped)	1.07	66.9	23.84
uasgfpGFPpos	uasgfp_23363	uasgfp_17_EGFPpositive.lsm (cropped)	1.75	84.16	9.94
uasgfpGFPpos	uasgfp_23364	uasgfp_17_EGFPpositive.lsm (cropped)	0.303	53.95	43.59
uasgfpGFPpos	uasgfp_23365	uasgfp_17_EGFPpositive.lsm (cropped)	0.297	61.04	76.58
uasgfpGFPpos	uasgfp_23366	uasgfp_17_EGFPpositive.lsm (cropped)	1.13	59.96	31.37
uasgfpGFPpos	uasgfp_23367	uasgfp_17_EGFPpositive.lsm (cropped)	3.71	92.66	19.98
uasgfpGFPpos	uasgfp_23368	uasgfp_17_EGFPpositive.lsm (cropped)	1.34	61.81	24.03
uasgfpGFPpos	uasgfp_23369	uasgfp_17_EGFPpositive.lsm (cropped)	0.773	75.45	12.58
uasgfpGFPpos	uasgfp_23370	uasgfp_17_EGFPpositive.lsm (cropped)	0.984	89.14	26.53
uasgfpGFPpos	uasgfp_23371	uasgfp_17_EGFPpositive.lsm (cropped)	2.59	69.05	38.09
uasgfpGFPpos	uasgfp_23372	uasgfp_17_EGFPpositive.lsm (cropped)	6.38	86.7	28
uasgfpGFPpos	uasgfp_23373	uasgfp_17_EGFPpositive.lsm (cropped)	1.1	65.29	16.3
uasgfpGFPpos	uasgfp_23374	uasgfp_17_EGFPpositive.lsm (cropped)	0.995	64.2	19.91
uasgfpGFPpos	uasgfp_23375	uasgfp_17_EGFPpositive.lsm (cropped)	0.395	50.68	19.92
uasgfpGFPpos	uasgfp_23376	uasgfp_17_EGFPpositive.lsm (cropped)	1.77	82.36	31.12
uasgfpGFPpos	uasgfp_23377	uasgfp_17_EGFPpositive.lsm (cropped)	1.51	82.32	8.56
uasgfpGFPpos	uasgfp_23378	uasgfp_17_EGFPpositive.lsm (cropped)	0.784	69.83	41.49
uasgfpGFPpos	uasgfp_23379	uasgfp_17_EGFPpositive.lsm (cropped)	1.63	66.95	19.72
uasgfpGFPpos	uasgfp_23380	uasgfp_17_EGFPpositive.lsm (cropped)	0.573	56.12	36.28
uasgfpGFPpos	uasgfp_23381	uasgfp_17_EGFPpositive.lsm (cropped)	2.87	62.41	26.97
uasgfpGFPpos	uasgfp_23382	uasgfp_17_EGFPpositive.lsm (cropped)	0.243	65.47	18.98
uasgfpGFPpos	uasgfp_23383	uasgfp_17_EGFPpositive.lsm (cropped)	1.49	71.52	22.64
uasgfpGFPpos	uasgfp_23384	uasgfp_17_EGFPpositive.lsm (cropped)	0.789	62.58	29.36
uasgfpGFPpos	uasgfp_23385	uasgfp_17_EGFPpositive.lsm (cropped)	2.36	75.5	43.87
uasgfpGFPpos	uasgfp_23386	uasgfp_17_EGFPpositive.lsm (cropped)	0.989	86.53	73.1
uasgfpGFPpos	uasgfp_23387	uasgfp_17_EGFPpositive.lsm (cropped)	23.34	94.07	45.14
uasgfpGFPpos	uasgfp_23388	uasgfp_17_EGFPpositive.lsm (cropped)	0.481	55.72	36.96
uasgfpGFPpos	uasgfp_23389	uasgfp_17_EGFPpositive.lsm (cropped)	0.287	59.85	8.49
uasgfpGFPpos	uasgfp_23390	uasgfp_17_EGFPpositive.lsm (cropped)	1.04	80.72	24.26
uasgfpGFPpos	uasgfp_23391	uasgfp_17_EGFPpositive.lsm (cropped)	0.487	89.13	59.31
uasgfpGFPpos	uasgfp_23392	uasgfp_17_EGFPpositive.lsm (cropped)	0.514	57.66	32.23
uasgfpGFPpos	uasgfp_23393	uasgfp_17_EGFPpositive.lsm (cropped)	0.389	52.64	22.07
uasgfpGFPpos	uasgfp_23394	uasgfp_17_EGFPpositive.lsm (cropped)	2.99	84.5	35.02
uasgfpGFPpos	uasgfp_23395	uasgfp_17_EGFPpositive.lsm (cropped)	0.303	82.34	11.59
uasgfpGFPpos	uasgfp_23396	uasgfp_17_EGFPpositive.lsm (cropped)	0.752	69.43	23.9
uasgfpGFPpos	uasgfp_23397	uasgfp_17_EGFPpositive.lsm (cropped)	0.303	57.88	11.8
uasgfpGFPpos	uasgfp_23398	uasgfp_17_EGFPpositive.lsm (cropped)	0.735	102.15	14.98
uasgfpGFPpos	uasgfp_23399	uasgfp_17_EGFPpositive.lsm (cropped)	0.724	56.4	9.47
uasgfpGFPpos	uasgfp_23400	uasgfp_17_EGFPpositive.lsm (cropped)	0.546	71.58	12.79
uasgfpGFPpos	uasgfp_23401	uasgfp_17_EGFPpositive.lsm (cropped)	2.24	61.9	27.47
uasgfpGFPpos	uasgfp_23402	uasgfp_17_EGFPpositive.lsm (cropped)	0.254	54.26	25.3
uasgfpGFPpos	uasgfp_23403	uasgfp_17_EGFPpositive.lsm (cropped)	0.281	53.79	27.02
uasgfpGFPpos	uasgfp_23404	uasgfp_17_EGFPpositive.lsm (cropped)	7.87	105.67	31.44
uasgfpGFPpos	uasgfp_23405	uasgfp_17_EGFPpositive.lsm (cropped)	6.5	101.97	28.23
uasgfpGFPpos	uasgfp_23406	uasgfp_17_EGFPpositive.lsm (cropped)	0.2	79.14	11
uasgfpGFPpos	uasgfp_23407	uasgfp_17_EGFPpositive.lsm (cropped)	2.84	85.59	20.16
uasgfpGFPpos	uasgfp_23408	uasgfp_17_EGFPpositive.lsm (cropped)	0.649	56.17	16.98
uasgfpGFPpos	uasgfp_23409	uasgfp_17_EGFPpositive.lsm (cropped)	0.643	66.7	13.82
uasgfpGFPpos	uasgfp_23410	uasgfp_17_EGFPpositive.lsm (cropped)	0.514	92.24	7.83
uasgfpGFPpos	uasgfp_23411	uasgfp_17_EGFPpositive.lsm (cropped)	0.211	71.21	5.59
uasgfpGFPpos	uasgfp_23412	uasgfp_17_EGFPpositive.lsm (cropped)	0.249	56.78	21.28
uasgfpGFPpos	uasgfp_23413	uasgfp_17_EGFPpositive.lsm (cropped)	0.314	49	42.34
uasgfpGFPpos	uasgfp_23414	uasgfp_17_EGFPpositive.lsm (cropped)	0.968	66.8	36.74
uasgfpGFPpos	uasgfp_23415	uasgfp_17_EGFPpositive.lsm (cropped)	1.36	70.21	28.89
uasgfpGFPpos	uasgfp_23416	uasgfp_17_EGFPpositive.lsm (cropped)	0.8	102.51	5.77
uasgfpGFPpos	uasgfp_23417	uasgfp_17_EGFPpositive.lsm (cropped)	1.9	68.72	53.72
uasgfpGFPpos	uasgfp_23418	uasgfp_17_EGFPpositive.lsm (cropped)	2.55	88.13	28.64
uasgfpGFPpos	uasgfp_23419	uasgfp_17_EGFPpositive.lsm (cropped)	0.308	56.93	11.96
uasgfpGFPpos	uasgfp_23420	uasgfp_17_EGFPpositive.lsm (cropped)	0.422	67.46	15.78
uasgfpGFPpos	uasgfp_23421	uasgfp_17_EGFPpositive.lsm (cropped)	4.58	87.52	26.02
uasgfpGFPpos	uasgfp_23422	uasgfp_17_EGFPpositive.lsm (cropped)	0.508	48	26.51
uasgfpGFPpos	uasgfp_23423	uasgfp_17_EGFPpositive.lsm (cropped)	0.265	46.63	34.37
uasgfpGFPpos	uasgfp_23424	uasgfp_17_EGFPpositive.lsm (cropped)	4.26	69.88	22.15
uasgfpGFPpos	uasgfp_23425	uasgfp_17_EGFPpositive.lsm (cropped)	3.22	80.58	22.22
uasgfpGFPpos	uasgfp_23426	uasgfp_17_EGFPpositive.lsm (cropped)	1.8	68.16	26.48
uasgfpGFPpos	uasgfp_23427	uasgfp_17_EGFPpositive.lsm (cropped)	3.3	68.62	34.63
uasgfpGFPpos	uasgfp_23428	uasgfp_17_EGFPpositive.lsm (cropped)	6.33	95.78	23.58
uasgfpGFPpos	uasgfp_23429	uasgfp_17_EGFPpositive.lsm (cropped)	2.17	92.63	21.37
uasgfpGFPpos	uasgfp_23430	uasgfp_17_EGFPpositive.lsm (cropped)	0.816	70.58	17.03
uasgfpGFPpos	uasgfp_23431	uasgfp_17_EGFPpositive.lsm (cropped)	3.85	81.96	18.3
uasgfpGFPpos	uasgfp_23432	uasgfp_17_EGFPpositive.lsm (cropped)	2.05	72.42	13.56
uasgfpGFPpos	uasgfp_23433	uasgfp_17_EGFPpositive.lsm (cropped)	0.205	54.39	20.39
uasgfpGFPpos	uasgfp_23434	uasgfp_17_EGFPpositive.lsm (cropped)	0.281	60.44	11.65
uasgfpGFPpos	uasgfp_23435	uasgfp_17_EGFPpositive.lsm (cropped)	0.243	49.96	13.07
uasgfpGFPpos	uasgfp_24672	uasgfp_18_EGFPpositive.lsm (cropped)	0.541	133.73	33.45
uasgfpGFPpos	uasgfp_24673	uasgfp_18_EGFPpositive.lsm (cropped)	0.378	89.96	20.66
uasgfpGFPpos	uasgfp_24674	uasgfp_18_EGFPpositive.lsm (cropped)	0.579	122.29	14.09
uasgfpGFPpos	uasgfp_24675	uasgfp_18_EGFPpositive.lsm (cropped)	0.314	92.93	14.4
uasgfpGFPpos	uasgfp_24676	uasgfp_18_EGFPpositive.lsm (cropped)	1.67	139.18	30.89
uasgfpGFPpos	uasgfp_24677	uasgfp_18_EGFPpositive.lsm (cropped)	0.984	128.79	49.89
uasgfpGFPpos	uasgfp_24678	uasgfp_18_EGFPpositive.lsm (cropped)	0.741	112.11	57.47
uasgfpGFPpos	uasgfp_24679	uasgfp_18_EGFPpositive.lsm (cropped)	0.4	96.58	29.84
uasgfpGFPpos	uasgfp_24680	uasgfp_18_EGFPpositive.lsm (cropped)	3.83	126.89	26.48
uasgfpGFPpos	uasgfp_24681	uasgfp_18_EGFPpositive.lsm (cropped)	1.03	127.73	26.03
uasgfpGFPpos	uasgfp_24682	uasgfp_18_EGFPpositive.lsm (cropped)	0.411	111.91	17.71
uasgfpGFPpos	uasgfp_24683	uasgfp_18_EGFPpositive.lsm (cropped)	0.73	109.56	25.84
uasgfpGFPpos	uasgfp_24684	uasgfp_18_EGFPpositive.lsm (cropped)	2.55	136.89	73.01
uasgfpGFPpos	uasgfp_24685	uasgfp_18_EGFPpositive.lsm (cropped)	0.249	94.67	38.93
uasgfpGFPpos	uasgfp_24686	uasgfp_18_EGFPpositive.lsm (cropped)	0.611	100.88	20.2
uasgfpGFPpos	uasgfp_24687	uasgfp_18_EGFPpositive.lsm (cropped)	3.38	117.27	46.5
uasgfpGFPpos	uasgfp_24688	uasgfp_18_EGFPpositive.lsm (cropped)	1.03	118.11	46.42
uasgfpGFPpos	uasgfp_24689	uasgfp_18_EGFPpositive.lsm (cropped)	1.81	130.45	16.31
uasgfpGFPpos	uasgfp_24690	uasgfp_18_EGFPpositive.lsm (cropped)	0.254	79.02	36.28
uasgfpGFPpos	uasgfp_24691	uasgfp_18_EGFPpositive.lsm (cropped)	7.16	135.07	87.61
uasgfpGFPpos	uasgfp_24692	uasgfp_18_EGFPpositive.lsm (cropped)	1.88	108.16	39.1
uasgfpGFPpos	uasgfp_24693	uasgfp_18_EGFPpositive.lsm (cropped)	1.83	99.85	30.72
uasgfpGFPpos	uasgfp_24694	uasgfp_18_EGFPpositive.lsm (cropped)	0.449	113.28	46.93
uasgfpGFPpos	uasgfp_24695	uasgfp_18_EGFPpositive.lsm (cropped)	0.227	74.67	41.1
uasgfpGFPpos	uasgfp_24696	uasgfp_18_EGFPpositive.lsm (cropped)	1.92	117.28	41.17
uasgfpGFPpos	uasgfp_24697	uasgfp_18_EGFPpositive.lsm (cropped)	1	80.18	38.05
uasgfpGFPpos	uasgfp_24698	uasgfp_18_EGFPpositive.lsm (cropped)	0.724	93.05	60.43
uasgfpGFPpos	uasgfp_24699	uasgfp_18_EGFPpositive.lsm (cropped)	0.2	107.84	58.32
uasgfpGFPpos	uasgfp_24700	uasgfp_18_EGFPpositive.lsm (cropped)	1.14	118.03	43.14
uasgfpGFPpos	uasgfp_24701	uasgfp_18_EGFPpositive.lsm (cropped)	3.25	120.44	78.44
uasgfpGFPpos	uasgfp_24702	uasgfp_18_EGFPpositive.lsm (cropped)	1.68	143.51	48.1
uasgfpGFPpos	uasgfp_24703	uasgfp_18_EGFPpositive.lsm (cropped)	0.481	95.71	41.81
uasgfpGFPpos	uasgfp_24704	uasgfp_18_EGFPpositive.lsm (cropped)	1.03	127.08	39.07
uasgfpGFPpos	uasgfp_24705	uasgfp_18_EGFPpositive.lsm (cropped)	0.935	131.34	45.9
uasgfpGFPpos	uasgfp_24706	uasgfp_18_EGFPpositive.lsm (cropped)	0.368	126.1	7.47
uasgfpGFPpos	uasgfp_24707	uasgfp_18_EGFPpositive.lsm (cropped)	0.535	86.98	15.36
uasgfpGFPpos	uasgfp_24708	uasgfp_18_EGFPpositive.lsm (cropped)	0.26	110.56	46.71
uasgfpGFPpos	uasgfp_24709	uasgfp_18_EGFPpositive.lsm (cropped)	0.351	92.68	46.34
uasgfpGFPpos	uasgfp_24710	uasgfp_18_EGFPpositive.lsm (cropped)	1	120.02	23.23
uasgfpGFPpos	uasgfp_24711	uasgfp_18_EGFPpositive.lsm (cropped)	0.211	73.08	48.79
uasgfpGFPpos	uasgfp_24712	uasgfp_18_EGFPpositive.lsm (cropped)	0.66	98.47	43.61
uasgfpGFPpos	uasgfp_24713	uasgfp_18_EGFPpositive.lsm (cropped)	3.45	147.28	66.41
uasgfpGFPpos	uasgfp_24714	uasgfp_18_EGFPpositive.lsm (cropped)	1.58	112.13	92.55
uasgfpGFPpos	uasgfp_24715	uasgfp_18_EGFPpositive.lsm (cropped)	0.368	129.15	16.5
uasgfpGFPpos	uasgfp_24716	uasgfp_18_EGFPpositive.lsm (cropped)	1.39	130.53	24.72
uasgfpGFPpos	uasgfp_24717	uasgfp_18_EGFPpositive.lsm (cropped)	0.697	106.87	46.47
uasgfpGFPpos	uasgfp_24718	uasgfp_18_EGFPpositive.lsm (cropped)	0.665	138.64	10.48
uasgfpGFPpos	uasgfp_24719	uasgfp_18_EGFPpositive.lsm (cropped)	1.19	99.56	112.41
uasgfpGFPpos	uasgfp_24720	uasgfp_18_EGFPpositive.lsm (cropped)	0.784	132.14	18.66
uasgfpGFPpos	uasgfp_24721	uasgfp_18_EGFPpositive.lsm (cropped)	0.779	110.53	12.74
uasgfpGFPpos	uasgfp_24722	uasgfp_18_EGFPpositive.lsm (cropped)	1.01	111.87	39.92
uasgfpGFPpos	uasgfp_24723	uasgfp_18_EGFPpositive.lsm (cropped)	2.98	121.33	34.4
uasgfpGFPpos	uasgfp_24724	uasgfp_18_EGFPpositive.lsm (cropped)	0.622	94.66	36
uasgfpGFPpos	uasgfp_24725	uasgfp_18_EGFPpositive.lsm (cropped)	0.254	100.3	48.23
uasgfpGFPpos	uasgfp_24726	uasgfp_18_EGFPpositive.lsm (cropped)	4.43	146.37	46.67
uasgfpGFPpos	uasgfp_24727	uasgfp_18_EGFPpositive.lsm (cropped)	1.36	95.5	36.22
uasgfpGFPpos	uasgfp_24728	uasgfp_18_EGFPpositive.lsm (cropped)	0.303	83.09	10.54
uasgfpGFPpos	uasgfp_24729	uasgfp_18_EGFPpositive.lsm (cropped)	0.568	115.2	39.57
uasgfpGFPpos	uasgfp_24730	uasgfp_18_EGFPpositive.lsm (cropped)	0.66	77.58	51.03
uasgfpGFPpos	uasgfp_24731	uasgfp_18_EGFPpositive.lsm (cropped)	0.232	74.42	20.16
uasgfpGFPpos	uasgfp_24732	uasgfp_18_EGFPpositive.lsm (cropped)	0.789	84.9	43.23
uasgfpGFPpos	uasgfp_24733	uasgfp_18_EGFPpositive.lsm (cropped)	0.984	110.86	35.57
uasgfpGFPpos	uasgfp_24734	uasgfp_18_EGFPpositive.lsm (cropped)	5.31	129.94	82.58
uasgfpGFPpos	uasgfp_24735	uasgfp_18_EGFPpositive.lsm (cropped)	5.36	139.06	65.93
uasgfpGFPpos	uasgfp_24736	uasgfp_18_EGFPpositive.lsm (cropped)	3.61	140.57	44.69
uasgfpGFPpos	uasgfp_24737	uasgfp_18_EGFPpositive.lsm (cropped)	0.816	105.36	42.02
uasgfpGFPpos	uasgfp_24738	uasgfp_18_EGFPpositive.lsm (cropped)	0.892	96.36	31.02
uasgfpGFPpos	uasgfp_24739	uasgfp_18_EGFPpositive.lsm (cropped)	0.346	106.64	24.81
uasgfpGFPpos	uasgfp_24740	uasgfp_18_EGFPpositive.lsm (cropped)	0.438	92.04	58.89
uasgfpGFPpos	uasgfp_24741	uasgfp_18_EGFPpositive.lsm (cropped)	4.68	132.28	75.61
uasgfpGFPpos	uasgfp_24742	uasgfp_18_EGFPpositive.lsm (cropped)	1.01	111.18	14.55
uasgfpGFPpos	uasgfp_24743	uasgfp_18_EGFPpositive.lsm (cropped)	1.08	86.32	62.37
uasgfpGFPpos	uasgfp_24744	uasgfp_18_EGFPpositive.lsm (cropped)	0.903	116.13	26.22
uasgfpGFPpos	uasgfp_24745	uasgfp_18_EGFPpositive.lsm (cropped)	2.35	152.51	14.51
uasgfpGFPpos	uasgfp_24746	uasgfp_18_EGFPpositive.lsm (cropped)	5.6	122.5	30.21
uasgfpGFPpos	uasgfp_24747	uasgfp_18_EGFPpositive.lsm (cropped)	0.335	80.66	34.97
uasgfpGFPpos	uasgfp_24748	uasgfp_18_EGFPpositive.lsm (cropped)	4.04	121.8	68.2
uasgfpGFPpos	uasgfp_24749	uasgfp_18_EGFPpositive.lsm (cropped)	4.28	133.13	85.51
uasgfpGFPpos	uasgfp_24750	uasgfp_18_EGFPpositive.lsm (cropped)	0.27	129.54	29.92
uasgfpGFPpos	uasgfp_24751	uasgfp_18_EGFPpositive.lsm (cropped)	9.31	154.12	64.63
uasgfpGFPpos	uasgfp_24752	uasgfp_18_EGFPpositive.lsm (cropped)	0.335	81.63	12.52
uasgfpGFPpos	uasgfp_24753	uasgfp_18_EGFPpositive.lsm (cropped)	6.84	151.15	34.54
uasgfpGFPpos	uasgfp_24754	uasgfp_18_EGFPpositive.lsm (cropped)	0.584	84.94	42.04
uasgfpGFPpos	uasgfp_24755	uasgfp_18_EGFPpositive.lsm (cropped)	0.465	114.7	30
uasgfpGFPpos	uasgfp_24756	uasgfp_18_EGFPpositive.lsm (cropped)	0.406	106.47	99.21
uasgfpGFPpos	uasgfp_24757	uasgfp_18_EGFPpositive.lsm (cropped)	2.78	122.38	48.39
uasgfpGFPpos	uasgfp_24758	uasgfp_18_EGFPpositive.lsm (cropped)	0.254	100.02	13.85
uasgfpGFPpos	uasgfp_24759	uasgfp_18_EGFPpositive.lsm (cropped)	0.232	83.3	36.53
uasgfpGFPpos	uasgfp_24760	uasgfp_18_EGFPpositive.lsm (cropped)	3.64	139.89	70.98
uasgfpGFPpos	uasgfp_24761	uasgfp_18_EGFPpositive.lsm (cropped)	2.14	123.43	35.92
uasgfpGFPpos	uasgfp_24762	uasgfp_18_EGFPpositive.lsm (cropped)	0.654	87.36	75.12
uasgfpGFPpos	uasgfp_24763	uasgfp_18_EGFPpositive.lsm (cropped)	0.216	72.75	29.48
uasgfpGFPpos	uasgfp_24764	uasgfp_18_EGFPpositive.lsm (cropped)	1.47	111.32	36.57
uasgfpGFPpos	uasgfp_24765	uasgfp_18_EGFPpositive.lsm (cropped)	1.49	80.39	43.9
uasgfpGFPpos	uasgfp_24766	uasgfp_18_EGFPpositive.lsm (cropped)	0.232	87.33	73.14
uasgfpGFPpos	uasgfp_24767	uasgfp_18_EGFPpositive.lsm (cropped)	0.535	80.66	72.25
uasgfpGFPpos	uasgfp_24768	uasgfp_18_EGFPpositive.lsm (cropped)	5.47	98.97	64.5
uasgfpGFPpos	uasgfp_24769	uasgfp_18_EGFPpositive.lsm (cropped)	5.36	93	87.89
uasgfpGFPpos	uasgfp_24770	uasgfp_18_EGFPpositive.lsm (cropped)	0.449	82.9	36.27
uasgfpGFPpos	uasgfp_24771	uasgfp_18_EGFPpositive.lsm (cropped)	1.87	89.01	65.93
uasgfpGFPpos	uasgfp_24772	uasgfp_18_EGFPpositive.lsm (cropped)	2.84	100.49	56.26
uasgfpGFPpos	uasgfp_24773	uasgfp_18_EGFPpositive.lsm (cropped)	0.941	78.8	22.78
uasgfpGFPpos	uasgfp_24774	uasgfp_18_EGFPpositive.lsm (cropped)	4.36	128.8	36.89
uasgfpGFPpos	uasgfp_24775	uasgfp_18_EGFPpositive.lsm (cropped)	1.69	116.51	11.48
uasgfpGFPpos	uasgfp_24776	uasgfp_18_EGFPpositive.lsm (cropped)	0.946	141.75	19.11
uasgfpGFPpos	uasgfp_26108	uasgfp_19_EGFPpositive.lsm (cropped)	0.627	84.18	8.49
uasgfpGFPpos	uasgfp_26109	uasgfp_19_EGFPpositive.lsm (cropped)	4.91	106.46	15.76
uasgfpGFPpos	uasgfp_26110	uasgfp_19_EGFPpositive.lsm (cropped)	0.633	88.69	9.56
uasgfpGFPpos	uasgfp_26111	uasgfp_19_EGFPpositive.lsm (cropped)	2.14	93.81	38.45
uasgfpGFPpos	uasgfp_26112	uasgfp_19_EGFPpositive.lsm (cropped)	0.2	91.49	14.14
uasgfpGFPpos	uasgfp_26113	uasgfp_19_EGFPpositive.lsm (cropped)	0.26	66.44	15.9
uasgfpGFPpos	uasgfp_26114	uasgfp_19_EGFPpositive.lsm (cropped)	0.946	79.79	18.38
uasgfpGFPpos	uasgfp_26115	uasgfp_19_EGFPpositive.lsm (cropped)	0.26	123.69	17.17
uasgfpGFPpos	uasgfp_26116	uasgfp_19_EGFPpositive.lsm (cropped)	0.287	77.42	21.94
uasgfpGFPpos	uasgfp_26117	uasgfp_19_EGFPpositive.lsm (cropped)	0.979	69.41	22.67
uasgfpGFPpos	uasgfp_26118	uasgfp_19_EGFPpositive.lsm (cropped)	0.773	86.43	12.71
uasgfpGFPpos	uasgfp_26119	uasgfp_19_EGFPpositive.lsm (cropped)	8.63	127.91	65.33
uasgfpGFPpos	uasgfp_26120	uasgfp_19_EGFPpositive.lsm (cropped)	2.3	88.85	16.64
uasgfpGFPpos	uasgfp_26121	uasgfp_19_EGFPpositive.lsm (cropped)	0.762	78.59	22.82
uasgfpGFPpos	uasgfp_26122	uasgfp_19_EGFPpositive.lsm (cropped)	1.11	94.99	19.26
uasgfpGFPpos	uasgfp_26123	uasgfp_19_EGFPpositive.lsm (cropped)	1.1	93.07	31.93
uasgfpGFPpos	uasgfp_26124	uasgfp_19_EGFPpositive.lsm (cropped)	2.5	76.33	14.93
uasgfpGFPpos	uasgfp_26125	uasgfp_19_EGFPpositive.lsm (cropped)	4.56	119.66	42.72
uasgfpGFPpos	uasgfp_26126	uasgfp_19_EGFPpositive.lsm (cropped)	0.443	70.39	21.27
uasgfpGFPpos	uasgfp_26127	uasgfp_19_EGFPpositive.lsm (cropped)	1.46	91.29	22.34
uasgfpGFPpos	uasgfp_26128	uasgfp_19_EGFPpositive.lsm (cropped)	0.438	89.91	24.8
uasgfpGFPpos	uasgfp_26129	uasgfp_19_EGFPpositive.lsm (cropped)	0.703	85.47	12.51
uasgfpGFPpos	uasgfp_26130	uasgfp_19_EGFPpositive.lsm (cropped)	0.984	83.52	12.63
uasgfpGFPpos	uasgfp_26131	uasgfp_19_EGFPpositive.lsm (cropped)	0.519	70.96	16.38
uasgfpGFPpos	uasgfp_26132	uasgfp_19_EGFPpositive.lsm (cropped)	1.12	83.03	31.64
uasgfpGFPpos	uasgfp_26133	uasgfp_19_EGFPpositive.lsm (cropped)	0.243	73.67	38.51
uasgfpGFPpos	uasgfp_26134	uasgfp_19_EGFPpositive.lsm (cropped)	0.957	69.45	58.92
uasgfpGFPpos	uasgfp_26135	uasgfp_19_EGFPpositive.lsm (cropped)	0.389	65.69	30.6
uasgfpGFPpos	uasgfp_26136	uasgfp_19_EGFPpositive.lsm (cropped)	0.276	62.43	9.51
uasgfpGFPpos	uasgfp_26137	uasgfp_19_EGFPpositive.lsm (cropped)	0.249	73.91	24.02
uasgfpGFPpos	uasgfp_26138	uasgfp_19_EGFPpositive.lsm (cropped)	1.08	82.61	34.34
uasgfpGFPpos	uasgfp_26139	uasgfp_19_EGFPpositive.lsm (cropped)	1.5	74.57	45.04
uasgfpGFPpos	uasgfp_26140	uasgfp_19_EGFPpositive.lsm (cropped)	2.77	105.78	40.95
uasgfpGFPpos	uasgfp_26141	uasgfp_19_EGFPpositive.lsm (cropped)	4.54	89.52	37.63
uasgfpGFPpos	uasgfp_26142	uasgfp_19_EGFPpositive.lsm (cropped)	10.98	94.92	44.16
uasgfpGFPpos	uasgfp_26143	uasgfp_19_EGFPpositive.lsm (cropped)	0.627	81.6	24.02
uasgfpGFPpos	uasgfp_26144	uasgfp_19_EGFPpositive.lsm (cropped)	0.514	77.33	21.62
uasgfpGFPpos	uasgfp_26145	uasgfp_19_EGFPpositive.lsm (cropped)	0.768	98.91	21.35
uasgfpGFPpos	uasgfp_26146	uasgfp_19_EGFPpositive.lsm (cropped)	1.05	84.8	24.54
uasgfpGFPpos	uasgfp_26147	uasgfp_19_EGFPpositive.lsm (cropped)	5.84	114.7	44.73
uasgfpGFPpos	uasgfp_26148	uasgfp_19_EGFPpositive.lsm (cropped)	0.297	72.31	47.22
uasgfpGFPpos	uasgfp_26149	uasgfp_19_EGFPpositive.lsm (cropped)	1.5	120.5	30.77
uasgfpGFPpos	uasgfp_26150	uasgfp_19_EGFPpositive.lsm (cropped)	1.55	82.11	15.84
uasgfpGFPpos	uasgfp_26151	uasgfp_19_EGFPpositive.lsm (cropped)	3.34	91.4	11.64
uasgfpGFPpos	uasgfp_26152	uasgfp_19_EGFPpositive.lsm (cropped)	1.32	87.34	56.56
uasgfpGFPpos	uasgfp_26153	uasgfp_19_EGFPpositive.lsm (cropped)	0.287	77.89	90.49
uasgfpGFPpos	uasgfp_26154	uasgfp_19_EGFPpositive.lsm (cropped)	1.5	90.05	33.86
uasgfpGFPpos	uasgfp_26155	uasgfp_19_EGFPpositive.lsm (cropped)	1.15	87.09	28.87
uasgfpGFPpos	uasgfp_26156	uasgfp_19_EGFPpositive.lsm (cropped)	0.476	69.59	14.83
uasgfpGFPpos	uasgfp_26157	uasgfp_19_EGFPpositive.lsm (cropped)	0.314	59.62	21.31
uasgfpGFPpos	uasgfp_26158	uasgfp_19_EGFPpositive.lsm (cropped)	1.53	73.04	38.22
uasgfpGFPpos	uasgfp_26159	uasgfp_19_EGFPpositive.lsm (cropped)	0.335	66.16	27.63
uasgfpGFPpos	uasgfp_26160	uasgfp_19_EGFPpositive.lsm (cropped)	0.308	66.07	29.77
uasgfpGFPpos	uasgfp_26161	uasgfp_19_EGFPpositive.lsm (cropped)	0.2	61.81	49.19
uasgfpGFPpos	uasgfp_26162	uasgfp_19_EGFPpositive.lsm (cropped)	1.01	74.37	48.01
uasgfpGFPpos	uasgfp_26163	uasgfp_19_EGFPpositive.lsm (cropped)	1.01	70.84	31.51
uasgfpGFPpos	uasgfp_26164	uasgfp_19_EGFPpositive.lsm (cropped)	0.887	85.46	38.23
uasgfpGFPpos	uasgfp_26165	uasgfp_19_EGFPpositive.lsm (cropped)	1.56	72.4	17.79
uasgfpGFPpos	uasgfp_26166	uasgfp_19_EGFPpositive.lsm (cropped)	1.49	84.78	32.94
uasgfpGFPpos	uasgfp_26167	uasgfp_19_EGFPpositive.lsm (cropped)	0.665	62.59	15.8
uasgfpGFPpos	uasgfp_26168	uasgfp_19_EGFPpositive.lsm (cropped)	0.373	68.71	31.38
uasgfpGFPpos	uasgfp_26169	uasgfp_19_EGFPpositive.lsm (cropped)	2.15	82.19	29.39
uasgfpGFPpos	uasgfp_26170	uasgfp_19_EGFPpositive.lsm (cropped)	0.492	71.16	27.21
uasgfpGFPpos	uasgfp_26171	uasgfp_19_EGFPpositive.lsm (cropped)	0.919	87.59	17.19
uasgfpGFPpos	uasgfp_26172	uasgfp_19_EGFPpositive.lsm (cropped)	0.357	77.03	35.88
uasgfpGFPpos	uasgfp_26173	uasgfp_19_EGFPpositive.lsm (cropped)	3.04	109.62	47.23
uasgfpGFPpos	uasgfp_26174	uasgfp_19_EGFPpositive.lsm (cropped)	1.77	86.39	33.33
uasgfpGFPpos	uasgfp_26175	uasgfp_19_EGFPpositive.lsm (cropped)	0.205	68.47	19.92
uasgfpGFPpos	uasgfp_26176	uasgfp_19_EGFPpositive.lsm (cropped)	7.47	109.03	50.58
uasgfpGFPpos	uasgfp_26177	uasgfp_19_EGFPpositive.lsm (cropped)	1.48	75.17	24.32
uasgfpGFPpos	uasgfp_26178	uasgfp_19_EGFPpositive.lsm (cropped)	6.06	90.3	46.71
uasgfpGFPpos	uasgfp_26179	uasgfp_19_EGFPpositive.lsm (cropped)	0.249	68.22	18.98
uasgfpGFPpos	uasgfp_26180	uasgfp_19_EGFPpositive.lsm (cropped)	1.75	76.41	30.15
uasgfpGFPpos	uasgfp_26181	uasgfp_19_EGFPpositive.lsm (cropped)	1.87	90.7	26.51
uasgfpGFPpos	uasgfp_26182	uasgfp_19_EGFPpositive.lsm (cropped)	2.22	81.12	23.55
uasgfpGFPpos	uasgfp_26183	uasgfp_19_EGFPpositive.lsm (cropped)	0.341	65.29	31.84
uasgfpGFPpos	uasgfp_26184	uasgfp_19_EGFPpositive.lsm (cropped)	4.01	90.48	22.53
uasgfpGFPpos	uasgfp_26185	uasgfp_19_EGFPpositive.lsm (cropped)	2.99	79.19	39.49
uasgfpGFPpos	uasgfp_26186	uasgfp_19_EGFPpositive.lsm (cropped)	1.01	86.06	25.9
uasgfpGFPpos	uasgfp_26187	uasgfp_19_EGFPpositive.lsm (cropped)	0.308	69.75	20.32
uasgfpGFPpos	uasgfp_26188	uasgfp_19_EGFPpositive.lsm (cropped)	1.01	77.42	23.45
uasgfpGFPpos	uasgfp_26189	uasgfp_19_EGFPpositive.lsm (cropped)	2.27	116.11	42.15
uasgfpGFPpos	uasgfp_26190	uasgfp_19_EGFPpositive.lsm (cropped)	0.838	87.18	24.68
uasgfpGFPpos	uasgfp_26191	uasgfp_19_EGFPpositive.lsm (cropped)	0.573	66.16	50.4
uasgfpGFPpos	uasgfp_26192	uasgfp_19_EGFPpositive.lsm (cropped)	0.649	73.92	38.12
uasgfpGFPpos	uasgfp_26193	uasgfp_19_EGFPpositive.lsm (cropped)	0.341	84.76	15.89
uasgfpGFPpos	uasgfp_26194	uasgfp_19_EGFPpositive.lsm (cropped)	1.42	75.19	38.74
uasgfpGFPpos	uasgfp_26195	uasgfp_19_EGFPpositive.lsm (cropped)	3.17	75.87	46.12
uasgfpGFPpos	uasgfp_26196	uasgfp_19_EGFPpositive.lsm (cropped)	1.98	79.69	28.15
uasgfpGFPpos	uasgfp_26197	uasgfp_19_EGFPpositive.lsm (cropped)	0.535	68	16.88
uasgfpGFPpos	uasgfp_26198	uasgfp_19_EGFPpositive.lsm (cropped)	0.406	69.71	14.91
uasgfpGFPpos	uasgfp_26199	uasgfp_19_EGFPpositive.lsm (cropped)	0.27	77.98	18.08
uasgfpGFPpos	uasgfp_26200	uasgfp_19_EGFPpositive.lsm (cropped)	2.02	68.07	32.42
uasgfpGFPpos	uasgfp_26201	uasgfp_19_EGFPpositive.lsm (cropped)	6.66	90.62	34.74
uasgfpGFPpos	uasgfp_26202	uasgfp_19_EGFPpositive.lsm (cropped)	0.73	73.53	43.66
uasgfpGFPpos	uasgfp_26203	uasgfp_19_EGFPpositive.lsm (cropped)	1.51	79.54	58.34
uasgfpGFPpos	uasgfp_26204	uasgfp_19_EGFPpositive.lsm (cropped)	0.989	71.3	41.75
uasgfpGFPpos	uasgfp_26205	uasgfp_19_EGFPpositive.lsm (cropped)	1.84	81.75	46.83
uasgfpGFPpos	uasgfp_26206	uasgfp_19_EGFPpositive.lsm (cropped)	0.573	59.75	43.78
uasgfpGFPpos	uasgfp_26207	uasgfp_19_EGFPpositive.lsm (cropped)	1.67	82.41	50.43
uasgfpGFPpos	uasgfp_26208	uasgfp_19_EGFPpositive.lsm (cropped)	6.66	105.08	50.95
uasgfpGFPpos	uasgfp_26209	uasgfp_19_EGFPpositive.lsm (cropped)	0.314	64.86	9.93
uasgfpGFPpos	uasgfp_26210	uasgfp_19_EGFPpositive.lsm (cropped)	0.773	72.96	25.78
uasgfpGFPpos	uasgfp_26211	uasgfp_19_EGFPpositive.lsm (cropped)	1.22	60.59	65.47
uasgfpGFPpos	uasgfp_26212	uasgfp_19_EGFPpositive.lsm (cropped)	0.222	104.05	7.63
uasgfpGFPpos	uasgfp_26213	uasgfp_19_EGFPpositive.lsm (cropped)	0.735	78.65	19.26
uasgfpGFPpos	uasgfp_26214	uasgfp_19_EGFPpositive.lsm (cropped)	1.37	78.27	38.87
uasgfpGFPpos	uasgfp_26215	uasgfp_19_EGFPpositive.lsm (cropped)	0.416	98.92	6.99
uasgfpGFPpos	uasgfp_26216	uasgfp_19_EGFPpositive.lsm (cropped)	1.05	79.79	13.04
uasgfpGFPpos	uasgfp_26217	uasgfp_19_EGFPpositive.lsm (cropped)	0.6	87.68	38.55
uasgfpGFPpos	uasgfp_26218	uasgfp_19_EGFPpositive.lsm (cropped)	1.21	89.69	42.43
uasgfpGFPpos	uasgfp_26219	uasgfp_19_EGFPpositive.lsm (cropped)	0.319	61.12	25.12
uasgfpGFPpos	uasgfp_26220	uasgfp_19_EGFPpositive.lsm (cropped)	0.487	107.6	25.18
uasgfpGFPpos	uasgfp_26221	uasgfp_19_EGFPpositive.lsm (cropped)	0.681	70.03	32.78
uasgfpGFPpos	uasgfp_26222	uasgfp_19_EGFPpositive.lsm (cropped)	0.86	72.62	11.53
uasgfpGFPpos	uasgfp_26223	uasgfp_19_EGFPpositive.lsm (cropped)	0.292	70.63	38.7
uasgfpGFPpos	uasgfp_26224	uasgfp_19_EGFPpositive.lsm (cropped)	1.18	95.68	33.77
uasgfpGFPpos	uasgfp_26225	uasgfp_19_EGFPpositive.lsm (cropped)	0.703	93.75	55.98
uasgfpGFPpos	uasgfp_26226	uasgfp_19_EGFPpositive.lsm (cropped)	1.98	112.31	22.66
uasgfpGFPpos	uasgfp_26227	uasgfp_19_EGFPpositive.lsm (cropped)	2.33	110.29	35.62
uasgfpGFPpos	uasgfp_26228	uasgfp_19_EGFPpositive.lsm (cropped)	0.254	77.09	15.06
uasgfpGFPpos	uasgfp_26229	uasgfp_19_EGFPpositive.lsm (cropped)	1.63	110.68	29.06
uasgfpGFPpos	uasgfp_26230	uasgfp_19_EGFPpositive.lsm (cropped)	4.04	104.98	46.33
uasgfpGFPpos	uasgfp_26231	uasgfp_19_EGFPpositive.lsm (cropped)	0.216	63.77	20.1
uasgfpGFPpos	uasgfp_26232	uasgfp_19_EGFPpositive.lsm (cropped)	0.411	63.57	30.16
uasgfpGFPpos	uasgfp_26233	uasgfp_19_EGFPpositive.lsm (cropped)	0.368	62.29	18.74
uasgfpGFPpos	uasgfp_26234	uasgfp_19_EGFPpositive.lsm (cropped)	1.27	70.19	69.09
uasgfpGFPpos	uasgfp_26235	uasgfp_19_EGFPpositive.lsm (cropped)	0.454	87.25	32.51
uasgfpGFPpos	uasgfp_26236	uasgfp_19_EGFPpositive.lsm (cropped)	1.78	93.22	32.81
uasgfpGFPpos	uasgfp_26237	uasgfp_19_EGFPpositive.lsm (cropped)	7.36	93.76	58.04
uasgfpGFPpos	uasgfp_26238	uasgfp_19_EGFPpositive.lsm (cropped)	2.63	101.17	39.86
uasgfpGFPpos	uasgfp_26239	uasgfp_19_EGFPpositive.lsm (cropped)	0.346	67.34	14.31
uasgfpGFPpos	uasgfp_26240	uasgfp_19_EGFPpositive.lsm (cropped)	0.568	77.56	7.61
uasgfpGFPpos	uasgfp_26241	uasgfp_19_EGFPpositive.lsm (cropped)	0.292	71.26	10.69
uasgfpGFPpos	uasgfp_26242	uasgfp_19_EGFPpositive.lsm (cropped)	0.319	66.53	17.92
uasgfpGFPpos	uasgfp_26243	uasgfp_19_EGFPpositive.lsm (cropped)	1.29	85.52	42.76
uasgfpGFPpos	uasgfp_26244	uasgfp_19_EGFPpositive.lsm (cropped)	4.15	111.36	34.74
uasgfpGFPpos	uasgfp_26245	uasgfp_19_EGFPpositive.lsm (cropped)	0.232	60.86	25.49
uasgfpGFPpos	uasgfp_26246	uasgfp_19_EGFPpositive.lsm (cropped)	0.324	58.7	23.42
uasgfpGFPpos	uasgfp_26247	uasgfp_19_EGFPpositive.lsm (cropped)	0.411	65.57	35.99
uasgfpGFPpos	uasgfp_27478	uasgfp_20_EGFPpositive.lsm (cropped)	1.7	128.93	14.63
uasgfpGFPpos	uasgfp_27479	uasgfp_20_EGFPpositive.lsm (cropped)	0.378	95.91	16.86
uasgfpGFPpos	uasgfp_27480	uasgfp_20_EGFPpositive.lsm (cropped)	0.292	91.26	28.87
uasgfpGFPpos	uasgfp_27481	uasgfp_20_EGFPpositive.lsm (cropped)	2.75	131.65	22.76
uasgfpGFPpos	uasgfp_27482	uasgfp_20_EGFPpositive.lsm (cropped)	1.13	90.24	15.9
uasgfpGFPpos	uasgfp_27483	uasgfp_20_EGFPpositive.lsm (cropped)	0.584	88.61	20.74
uasgfpGFPpos	uasgfp_27484	uasgfp_20_EGFPpositive.lsm (cropped)	4.87	134.25	25.48
uasgfpGFPpos	uasgfp_27485	uasgfp_20_EGFPpositive.lsm (cropped)	0.503	93.24	17.52
uasgfpGFPpos	uasgfp_27486	uasgfp_20_EGFPpositive.lsm (cropped)	0.822	103.14	20.03
uasgfpGFPpos	uasgfp_27487	uasgfp_20_EGFPpositive.lsm (cropped)	1.41	122.49	12.84
uasgfpGFPpos	uasgfp_27488	uasgfp_20_EGFPpositive.lsm (cropped)	2.6	146.32	33.28
uasgfpGFPpos	uasgfp_27489	uasgfp_20_EGFPpositive.lsm (cropped)	0.287	83.85	16.08
uasgfpGFPpos	uasgfp_27490	uasgfp_20_EGFPpositive.lsm (cropped)	0.816	109.32	65.7
uasgfpGFPpos	uasgfp_27491	uasgfp_20_EGFPpositive.lsm (cropped)	0.47	87.13	49.75
uasgfpGFPpos	uasgfp_27492	uasgfp_20_EGFPpositive.lsm (cropped)	4.19	144.5	30.1
uasgfpGFPpos	uasgfp_27493	uasgfp_20_EGFPpositive.lsm (cropped)	2.44	127.49	20.15
uasgfpGFPpos	uasgfp_27494	uasgfp_20_EGFPpositive.lsm (cropped)	1.58	104.61	16.78
uasgfpGFPpos	uasgfp_27495	uasgfp_20_EGFPpositive.lsm (cropped)	2.32	126.85	25.11
uasgfpGFPpos	uasgfp_27496	uasgfp_20_EGFPpositive.lsm (cropped)	0.243	75.02	28.71
uasgfpGFPpos	uasgfp_27497	uasgfp_20_EGFPpositive.lsm (cropped)	3.56	133.68	31.64
uasgfpGFPpos	uasgfp_27498	uasgfp_20_EGFPpositive.lsm (cropped)	0.941	107.95	14.36
uasgfpGFPpos	uasgfp_27499	uasgfp_20_EGFPpositive.lsm (cropped)	1.28	97.18	43.53
uasgfpGFPpos	uasgfp_27500	uasgfp_20_EGFPpositive.lsm (cropped)	0.697	113.71	16.01
uasgfpGFPpos	uasgfp_27501	uasgfp_20_EGFPpositive.lsm (cropped)	1.47	128.15	24.9
uasgfpGFPpos	uasgfp_27502	uasgfp_20_EGFPpositive.lsm (cropped)	1.67	101.23	28.53
uasgfpGFPpos	uasgfp_27503	uasgfp_20_EGFPpositive.lsm (cropped)	0.622	94.68	13
[truncated: 2,949 more rows]
