# Supplementary material for: Robo2 regulates synaptic oxytocin content by affecting actin dynamics
Source: eLife. 2019 Jun 10;8:e45650. doi: 10.7554/eLife.45650 (PMC6590984; doi:10.7554/eLife.45650)
Supplement: Source code 1. — The script generates tables with parameters such as animal ID, synapse or puncta ID, volume etc. In this manuscript, the script has been used for all the analysis in which number, synaptic OXT content and fluorescence values has been analyzed (Figures 1–5 and 7). [file elife-45650-code1.r]

phenotypes=c("Ctrl", "20minsSalt", "60minsSalt" , "Recovery")
# remember to change n for for loop

#Change input directories
dirs=c("C:/Users/savani/Box Sync/Images/Salt stress/15-12-11 Salt stress OxtGFP 8dpf/Raw data/Control",
       "C:/Users/savani/Box Sync/Images/Salt stress/15-12-11 Salt stress OxtGFP 8dpf/Raw data/20mins salt",
       "C:/Users/savani/Box Sync/Images/Salt stress/15-12-11 Salt stress OxtGFP 8dpf/Raw data/60mins salt",
       "C:/Users/savani/Box Sync/Images/Salt stress/15-12-11 Salt stress OxtGFP 8dpf/Raw data/recovery")

######

HB.blobs=as.data.frame(matrix(NA,ncol=11))
names(HB.blobs)=c("Pheno","BlobsID", "Item.Name","Volume","CentX","CentY","CentZ","CompartmentID","NoofOxt", "OxtPixels", "GFPPixels")
HB.with.oxt=as.data.frame(matrix(NA,ncol=11))
names(HB.with.oxt)=c("Pheno","BlobsID","Item.Name","Volume","CentX","CentY","CentZ","CompartmentID","NoofOxt", "OxtPixels", "GFPPixels")
HB.without.oxt=as.data.frame(matrix(NA,ncol=11))
names(HB.without.oxt)=c("Pheno","BlobsID","Item.Name","Volume","CentX","CentY","CentZ","CompartmentID","NoofOxt", "OxtPixels", "GFPPixels")


GP.oxt=as.data.frame(matrix(NA,ncol=11))
names(GP.oxt)=c("Pheno","BlobsID","Item.Name","Volume","CentX","CentY","CentZ","CompartmentID","NoofOxt", "OxtPixels", "GFPPixels")
oxt.HB=as.data.frame(matrix(NA,ncol=11))
names(oxt.HB)=c("Pheno","BlobsID","Item.Name","Volume","CentX","CentY","CentZ","CompartmentID","NoofOxt", "OxtPixels", "GFPPixels")
oxt.not.HB=as.data.frame(matrix(NA,ncol=11))
names(oxt.not.HB)=c("Pheno","BlobsID","Item.Name","Volume","CentX","CentY","CentZ","CompartmentID","NoofOxt", "OxtPixels", "GFPPixels")


#########################
#Change X to number of groups 
#for (i in 1: X)
########################

for (i in 1:4) {
  setwd(dirs[i])
  files=list.files(path=dirs[i])
  
  for (j in 1:length(files)) {
    
    tempfile=read.delim(files[j])
    
    HB.blobs.temp=tempfile[tempfile$Population=="GFP Blobs of size 0.2 to 25 um3",c(1,2,9,20:22,42,43, 17,12)]
    Pheno=rep(phenotypes[i],dim(HB.blobs.temp)[1])
    HB.blobs.temp=cbind(Pheno,HB.blobs.temp)
    names(HB.blobs.temp)=names(HB.blobs)
    HB.blobs=rbind(HB.blobs,HB.blobs.temp)
    
    
    
    HB.with.oxt.temp=tempfile[tempfile$Population=="GFP with oxytocin",c(1,2,9,20:22,42,43, 17,12)]
    Pheno=rep(phenotypes[i],dim(HB.with.oxt.temp)[1])
    HB.with.oxt.temp=cbind(Pheno,HB.with.oxt.temp)
    names(HB.with.oxt.temp)=names(HB.with.oxt)
    HB.with.oxt=rbind(HB.with.oxt,HB.with.oxt.temp)
    
    
    
    
    HB.without.oxt.temp=tempfile[tempfile$Population=="GFP without oxytocin",c(1,2,9,20:22,42,43, 17,12)]
    Pheno=rep(phenotypes[i],dim(HB.without.oxt.temp)[1])
    HB.without.oxt.temp=cbind(Pheno,HB.without.oxt.temp)
    names(HB.without.oxt.temp)=names(HB.without.oxt)
    HB.without.oxt=rbind(HB.without.oxt,HB.without.oxt.temp)
    
    
    GP.oxt.temp=tempfile[tempfile$Population=="GP-Oxt of size 0.2 to 25",c(1,2,9,20:22,42,43 , 17,12)]
    Pheno=rep(phenotypes[i],dim(GP.oxt.temp)[1])
    GP.oxt.temp=cbind(Pheno,GP.oxt.temp)
    names(GP.oxt.temp)=names(GP.oxt)
    GP.oxt=rbind(GP.oxt,GP.oxt.temp)
    
    
    oxt.HB.temp=tempfile[tempfile$Population=="Oxt in HB",c(1,2,9,20:22,42,43 , 17,12)]
    Pheno=rep(phenotypes[i],dim(oxt.HB.temp)[1])
    oxt.HB.temp=cbind(Pheno,oxt.HB.temp)
    names(oxt.HB.temp)=names(oxt.HB)
    oxt.HB=rbind(oxt.HB,oxt.HB.temp)
    
    
    
    
    oxt.not.HB.temp=tempfile[tempfile$Population=="Oxt not in HB",c(1,2,9,20:22,42,43 , 17,12)]
    Pheno=rep(phenotypes[i],dim(oxt.not.HB.temp)[1])
    oxt.not.HB.temp=cbind(Pheno,oxt.not.HB.temp)
    names(oxt.not.HB.temp)=names(oxt.not.HB)
    oxt.not.HB=rbind(oxt.not.HB,oxt.not.HB.temp)
    
    
    
  }
}


HB.blobs=HB.blobs[is.na(HB.blobs$Pheno)==F,]
HB.with.oxt=HB.with.oxt[is.na(HB.with.oxt$Pheno)==F,]
HB.without.oxt=HB.without.oxt[is.na(HB.without.oxt$Pheno)==F,]

GP.oxt=GP.oxt[is.na(GP.oxt$Pheno)==F,]
oxt.HB=oxt.HB[is.na(oxt.HB$Pheno)==F,]
oxt.not.HB=oxt.not.HB[is.na(oxt.not.HB$Pheno)==F,]


##########
setwd("C:/Users/savani/Box Sync/Images/Salt stress/15-12-11 Salt stress OxtGFP 8dpf/Extracted data")


write.csv(HB.blobs,file="GFP blobs.csv")
write.csv(HB.with.oxt,file="GFP with oxytocin.csv")
write.csv(HB.without.oxt,file="GFP without oxt.csv")

write.csv(GP.oxt,file="GP oxt.csv")
write.csv(oxt.HB,file="oxt HB.csv")
write.csv(oxt.not.HB,file="oxt not HB.csv")
