# Supplementary material for: Robo2 regulates synaptic oxytocin content by affecting actin dynamics
Source: eLife. 2019 Jun 10;8:e45650. doi: 10.7554/eLife.45650 (PMC6590984; doi:10.7554/eLife.45650)
Supplement: Source code 2. — In this manuscript, the script has been used for all the analysis in which number, synaptic OXT content and fluorescence values has been analyzed (Figures 1–5 and 7). [file elife-45650-code2.r]

setwd("C:/Users/savani/Box Sync/Images/Salt stress/15-12-11 Salt stress OxtGFP 8dpf/Extracted data")

###########

#Transformations 


HB = read.csv("GFP blobs.csv", stringsAsFactors = FALSE)
HB_withOxt = read.csv("GFP with oxytocin.csv", stringsAsFactors = FALSE)
HB_withoutOxt = read.csv("GFP without oxt.csv", stringsAsFactors = FALSE)
oxt = read.csv("GP oxt.csv", stringsAsFactors = FALSE)
oxt_in_HB = read.csv("oxt HB.csv", stringsAsFactors = FALSE)
oxt_not_HB = read.csv("oxt not HB.csv", stringsAsFactors = FALSE)


#Transformations 

HB$logVolume = log10( HB$Volume )
HB$pixelratio = ( HB$OxtPixels /  HB$GFPPixels )
write.csv(HB, file = "GFP blobs Transformed.csv", row.names = FALSE)


#Transformations 
HB_withOxt$logVolume = log10( HB_withOxt$Volume )
HB_withOxt$pixelratio = ( HB_withOxt$OxtPixels /  HB_withOxt$GFPPixels )
write.csv(HB_withOxt, file = "GFP blobs with oxt Transformed.csv", row.names = FALSE)


###########

#Transformations 


HB_withoutOxt$logVolume = log10( HB_withoutOxt$Volume )
HB_withoutOxt$pixelratio = ( HB_withoutOxt$OxtPixels /  HB_withoutOxt$GFPPixels )
write.csv(HB_withoutOxt, file = "GFP blobs without oxt Transformed.csv", row.names = FALSE)


#########


oxt$logVolume = log10( oxt$Volume )
oxt$pixelratio = ( oxt$OxtPixels /  oxt$GFPPixels )
write.csv(oxt, file = "oxt total Transformed.csv", row.names = FALSE)

##########


oxt_in_HB$logVolume = log10( oxt_in_HB$Volume )
oxt_in_HB$pixelratio = ( oxt_in_HB$OxtPixels/oxt_in_HB$GFPPixels )
write.csv(oxt_in_HB, file = "oxt in HB Transformed.csv", row.names = FALSE)


#############


oxt_not_HB$logVolume = log10( oxt_not_HB$Volume )
oxt_not_HB$pixelratio = ( oxt_not_HB$OxtPixels / oxt_not_HB$GFPPixels )
write.csv(oxt_not_HB, file = "oxt not HB Transformed.csv", row.names = FALSE)
