# Supplementary material for: Robo2 regulates synaptic oxytocin content by affecting actin dynamics
Source: eLife. 2019 Jun 10;8:e45650. doi: 10.7554/eLife.45650 (PMC6590984; doi:10.7554/eLife.45650)
Supplement: Source code 3. — The mean number and volume of neurohypophyseal synapse and OXT puncta will be generated upon execution of the script. In this manuscript, the script has been used for all the analysis in which number, synaptic OXT content and fluorescence values has been analyzed (Figures 1–5 and 7). [file elife-45650-code3.r]

setwd("C:/Users/savani/Box Sync/Images/Salt stress/15-12-11 Salt stress OxtGFP 8dpf/Extracted data")

### Axonal swelling = Synapses = Herring bodies  

#Total Axonal swelling counts
GFPblobstotal.dat=read.csv("GFP blobs Transformed.csv")
GFPblobstotal.dat$Pheno <- factor(GFPblobstotal.dat$Pheno, levels = c("Ctrl", "20minsSalt", "60minsSalt" , "Recovery"))
GFPblobstotal.dat$Pheno=as.factor(GFPblobstotal.dat$Pheno)

#Select only <25
GFPblobstotal.dat <- subset(GFPblobstotal.dat, Volume <25)


# Extraction of number of total Herring bodies
GFPblobstotal.counts=table(GFPblobstotal.dat$Item.Name,GFPblobstotal.dat$Pheno)
GFPblobstotal.counts=as.data.frame(GFPblobstotal.counts) #Rearrange data
GFPblobstotal.counts=GFPblobstotal.counts[GFPblobstotal.counts$Freq>0,] #Remove values with zeroes created by TABLE command


#Counts analysis
boxplot(Freq ~ Var2 , data = GFPblobstotal.counts , ylab = "# Axonal swellings")


kruskal.test(Freq ~ Var2 , data = GFPblobstotal.counts)
totalGFPHB.counts.anova=aov(Freq~Var2,data=GFPblobstotal.counts)   
summary(totalGFPHB.counts.anova)
totalGFPHB.counts.anova.tukey=TukeyHSD(totalGFPHB.counts.anova)
totalGFPHB.counts.anova.tukey


# Save GFP HB counts data
names(GFPblobstotal.counts)=c("Fish ID","Age","No of GFP HB")
write.csv(GFPblobstotal.counts,file="Results_Counts_Total No of GFP HB.csv",row.names=F)


################

#Total Oxt blobs
Oxtblobstotal.dat=read.csv("oxt total Transformed.csv")
Oxtblobstotal.dat$Pheno <- factor(Oxtblobstotal.dat$Pheno, levels = c("Ctrl", "20minsSalt", "60minsSalt" , "Recovery"))
Oxtblobstotal.dat$Pheno=as.factor(Oxtblobstotal.dat$Pheno)

#Select only <25
Oxtblobstotal.dat <- subset(Oxtblobstotal.dat, Volume <25)

# Extraction of number of total Herring bodies
Oxtblobstotal.counts=table(Oxtblobstotal.dat$Item.Name,Oxtblobstotal.dat$Pheno)
Oxtblobstotal.counts=as.data.frame(Oxtblobstotal.counts) #Rearrange data
Oxtblobstotal.counts=Oxtblobstotal.counts[Oxtblobstotal.counts$Freq>0,] #Remove values with zeroes created by TABLE command


#Counts analysis
boxplot(Freq ~ Var2 , data = Oxtblobstotal.counts , ylab = "# Oxt blobs")


kruskal.test(Freq ~ Var2 , data = Oxtblobstotal.counts)
Oxtblobstotal.counts.anova=aov(Freq~Var2,data=Oxtblobstotal.counts)   
summary(Oxtblobstotal.counts.anova)
Oxtblobstotal.counts.anova.tukey=TukeyHSD(Oxtblobstotal.counts.anova)
Oxtblobstotal.counts.anova.tukey


# Save Oxt blobs counts data
names(Oxtblobstotal.counts)=c("Fish ID","Age","No of Oxt blobs")
write.csv(Oxtblobstotal.counts,file="Results_Counts_Total No of Oxt blobs.csv",row.names=F)


###############


#Read HB with Oxt data

GFPblobsdat=read.csv("GFP blobs with oxt Transformed.csv")
GFPblobsdat$Pheno <- factor(GFPblobsdat$Pheno, levels = c("Ctrl", "20minsSalt", "60minsSalt" , "Recovery" ))
GFPblobsdat$Pheno=as.factor(GFPblobsdat$Pheno)
GFPblobsdat <- subset(GFPblobsdat, Volume <25)


names(GFPblobsdat)
summary(GFPblobsdat)


# Extraction of number of Herring bodies
GFPblobscounts=table(GFPblobsdat$Item.Name,GFPblobsdat$Pheno)
GFPblobscounts=as.data.frame(GFPblobscounts) #Rearrange data
GFPblobscounts=GFPblobscounts[GFPblobscounts$Freq>0,] #Remove values with zeroes created by TABLE command


#Counts analysis
boxplot(Freq ~ Var2 , data = GFPblobscounts , ylab = "# Oxt+ Axonal swellings" )


kruskal.test(GFPblobscounts$Freq ~ GFPblobscounts$Var2 , data = GFPblobscounts)
counts.anova=aov(Freq~Var2,data=GFPblobscounts)   
summary(counts.anova)
counts.anova.tukey=TukeyHSD(counts.anova)
counts.anova.tukey


# Save GFP HB counts data
names(GFPblobscounts)=c("Fish ID","Age","No of GFP HB with Oxt")
write.csv(GFPblobscounts,file="Results_Counts_No of GFP HB with Oxt.csv",row.names=F)


############Total oxt in HB counts

oxtinHB.dat=read.csv("oxt in HB Transformed.csv")
oxtinHB.dat$Pheno <- factor(oxtinHB.dat$Pheno, levels = c("Ctrl", "20minsSalt", "60minsSalt" , "Recovery"))
oxtinHB.dat$Pheno=as.factor(oxtinHB.dat$Pheno)

#Select only <25
oxtinHB.dat <- subset(oxtinHB.dat, Volume <25)


oxtinHB.counts=table(oxtinHB.dat$Item.Name,oxtinHB.dat$Pheno)
oxtinHB.counts=as.data.frame(oxtinHB.counts) #Rearrange data
oxtinHB.counts=oxtinHB.counts[oxtinHB.counts$Freq>0,] #Remove values with zeroes created by TABLE command


#Counts analysis
boxplot(Freq ~ Var2 , data = oxtinHB.counts , ylab = "# AS+ Oxt" )


kruskal.test(oxtinHB.counts$Freq ~ oxtinHB.counts$Var2 , data = oxtinHB.counts)
counts.anova=aov(Freq~Var2,data=oxtinHB.counts)   
summary(counts.anova)
counts.anova.tukey=TukeyHSD(counts.anova)
counts.anova.tukey


# Save GFP HB without Oxt counts data
names(oxtinHB.counts)=c("Fish ID","Age","No of HBpositive Oxt")
write.csv(oxtinHB.counts,file="Results_Counts_No of Oxt blobs in HB.csv",row.names=F)


##############


#Volume analysis


#Volume analysis for total HB


#Calc individual means & plot
logGFPHB_total_means <- aggregate(logVolume ~ Pheno + Item.Name , data=GFPblobstotal.dat, mean)
boxplot(logVolume ~ Pheno , data = logGFPHB_total_means, ylab = "Mean Total HB volume (Scale: log10)")

kruskal.test(logVolume ~ Pheno , data = logGFPHB_total_means)
logGFPHB_total_means.anova <- aov(logVolume ~ Pheno , data = logGFPHB_total_means)
summary(logGFPHB_total_means.anova )

logGFPHB_total_means.anova.tukey=TukeyHSD(logGFPHB_total_means.anova)
logGFPHB_total_means.anova.tukey


logGFPHB_total_means$backTransformedVolume <- 10^(logGFPHB_total_means$logVolume)


write.csv(logGFPHB_total_means,file="Results_MeanVolumes_HB_total.csv",row.names=F)


###############


#HB with Oxt

#Calc individual means & plot
logGFPHBmeans <- aggregate(logVolume ~ Pheno + Item.Name , data=GFPblobsdat, mean)
boxplot(logVolume ~ Pheno , data = logGFPHBmeans, ylab = "Mean Oxt+ AS volume (Scale: log10)")

kruskal.test(logVolume ~ Pheno , data = logGFPHBmeans)
logGFPHBmeans.anova <- aov(logVolume ~ Pheno , data = logGFPHBmeans)
summary(logGFPHBmeans.anova )

logGFPHBmeans.anova.tukey=TukeyHSD(logGFPHBmeans.anova)
logGFPHBmeans.anova.tukey


logGFPHBmeans$backTransformedVolume <- 10^(logGFPHBmeans$logVolume)


write.csv(logGFPHBmeans,file="Results_MeanVolumes_HB_with_Oxt.csv",row.names=F)


####################


#Oxt Volume total  analysis


#Calc individual means & plot
log_total_oxt_volmeans <- aggregate(logVolume ~ Pheno + Item.Name , data=Oxtblobstotal.dat, mean)
boxplot(logVolume ~ Pheno , data = log_total_oxt_volmeans, ylab = "Mean total Oxt blob volume (Scale: log10)")

kruskal.test(logVolume ~ Pheno , data = log_total_oxt_volmeans)
log_total_oxt_volmeans.anova <- aov(logVolume ~ Pheno , data = log_total_oxt_volmeans)
summary(log_total_oxt_volmeans.anova )

log_total_oxt_volmeans.anova.tukey=TukeyHSD(log_total_oxt_volmeans.anova)
log_total_oxt_volmeans.anova.tukey


log_total_oxt_volmeans$backTransformedVolume <- 10^(log_total_oxt_volmeans$logVolume)


write.csv(log_total_oxt_volmeans,file="Results_MeanVolumes_Oxt_total.csv",row.names=F)


###################


#Oxt in HB Volume analysis


#### oxt in HB volume analysis

#Calc individual means & plot
logOxtVolmeans <- aggregate(logVolume ~ Pheno + Item.Name , data=oxtinHB.dat, mean)
boxplot(logVolume ~ Pheno , data = logOxtVolmeans, ylab = "Mean AS+ Oxt blob volume (Scale: log10)")

kruskal.test(logVolume ~ Pheno , data = logOxtVolmeans)
logOxtVolmeans.anova <- aov(logVolume ~ Pheno , data = logOxtVolmeans)
summary(logOxtVolmeans.anova )

logOxtVolmeans.anova.tukey=TukeyHSD(logOxtVolmeans.anova)
logOxtVolmeans.anova.tukey


logOxtVolmeans$backTransformedVolume <- 10^(logOxtVolmeans$logVolume)


write.csv(logOxtVolmeans,file="Results_MeanVolumes_Oxt_in_HB.csv",row.names=F)
